# Supplementary material for: Developing a medication adherence technologies repository: proposed structure and protocol for an online real-time Delphi study
Source: PubMed Central journal article supplement — BMJ Open. 2022 Apr 22;12(4):e059674. doi: 10.1136/bmjopen-2021-059674 (PMC9074304; doi:10.1136/bmjopen-2021-059674), 2022-04-22

## Welcome to the ENABLE-R real time Delphi survey!

**ENABLE** is a European Cooperation In Science and Technology (COST) project ([“CA19132 - European Network to Advance Best practices & technoLogY on medication adherencE”](#)) that aims to raise awareness of medication adherence technologies and best practices, and to foster and extend multidisciplinary knowledge on medication adherence at patient, treatment and system levels. COST is supported by the EU Framework Programme Horizon 2020. ENABLE currently has members from 39 European countries.

**ENABLE-R** will be an **online repository of medication adherence technologies (ENABLE-R)**, which will describe a wide range of technologies relevant for different potential users: patients, healthcare professionals, managers of healthcare organisations, policy makers, researchers. The aim is to develop a user-friendly repository, where users will be able to search technologies with specific attributes, that would fit their context and needs.

**This Delphi survey aims to explore the level of agreement with the proposed scope and structure of the repository.** A steering committee has been working since October 2020 to define medication adherence technologies and propose a repository structure that considers many aspects of such technologies and their use in different settings. To ensure that the scope and structure is in line with stakeholders' needs and expectations, we created this Delphi survey to consult with stakeholders across Europe on several key elements of the proposed scope and structure. The study obtained ethical approval and positive data protection assessment. Please consult the survey information letter or contact us at [wg2costenable@gmail.com](mailto:wg2costenable@gmail.com) if you have any questions.

***You were recognized as a stakeholder in the area of medication adherence and are invited to participate in this Delphi survey. Thank you for taking time to complete this survey. We value your contribution.***

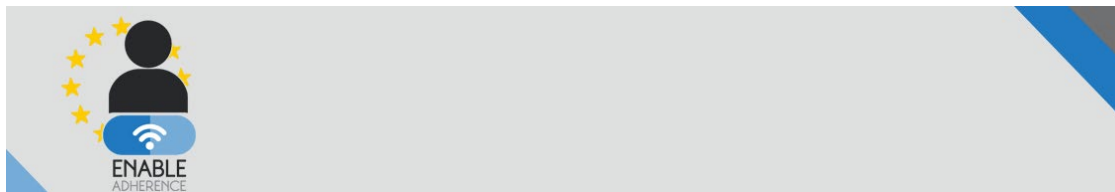

## Instruction for the Delphi survey

### The content and structure of the survey

The survey includes **23 questions** related to repository structure, each presented on a separate page. Before starting the survey, we request some **basic information** about you and your experience in medication adherence.

- We present the proposed **definition of the medication adherence technologies (MATEch)** for your consideration.
- We invite you to take some time **to explore the full framework of attributes**. It consists of **three domains** (D1. Product & provider information; D2. Medication adherence descriptors; D3. Evaluation & implementation) with underlying attribute groups. Each attribute group branches further in sublevels with related labels and definitions and is labeled with domain number and consecutive number according to the level it represents (e.g. D2.1 or D2.1.1). The complete framework is presented in an interactive graph and in a Excel document detailing proposed structure, labels, definitions and justifications; you may open these documents in separate windows so that you can consult them throughout the survey. After familiarizing yourself with the framework, we ask you to **provide general comments about any missing attributes** relevant for a future MATEch repository.
- We describe each domain on one page and present each attribute group and respective sublevels for your consideration on separate pages and ask you to rate **their overall relevance and clarity** and provide **comments or suggestions for improvement** of attribute labels or definitions, and any specific thoughts about any missing attributes in this particular group.

---

### The real time Delphi approach

This survey uses a **real-time approach**, which means that, once you answer a question, you will immediately see other's responses and comments and aggregated feedback on your screen. The strength of the Delphi approach lies in participants having the opportunity to revisit their answers based on other's answers and comments. Hence, it is very important that you **visit the survey two or more times during the study period and reconsider your answers based on the aggregated results and discussions in the comments section**. You are also encouraged to engage in the discussion by explaining the reasons for your responses and making suggestions for improvement. These will also appear in real-time and allow (anonymous) exchanges among stakeholders.

We will regularly check the platform, send updates on the study progress and reminders to (re)visit the survey.

---

### Completing the survey

It should take you **45 to 60 minutes** to complete the survey the first time, and approximately **30 to 60 minutes** for revisiting your answers at a later moment (depending on the level of engagement in discussions you prefer).

You can **navigate across pages** in the survey by clicking on the **blue arrow above the page number**. An index window opens and you can choose which questions you would like to answer. For the first

visit to the survey, we recommend following the order provided. You can **log in and out of the survey** and upon return continue answering where you stopped the last time.

---

### Format of the questions

For each attribute, an **interactive 2D grid with two axes** (*see below*) will appear:

- the **horizontal (X) axis** represents **RELEVANCE** of the proposed attribute group for the repository structure on a scale from **1-9 (left-right)**, where 1 indicates extremely not relevant (*far left*) and 9 indicates extremely relevant (*far right*). By relevance, we mean **the extent to which these attributes are important in order to make informed choices regarding their adoption and use**.
- the **vertical (Y) axis** represents **CLARITY** of the attribute group labels and definitions on a scale from **1-9 (bottom-top)**, where 1 indicates extremely not clear (*bottom*) and 9 indicates extremely clear (*top*). By clarity, we mean **the extent to which the labels and definitions of these attributes are easy to understand and apply by repository users**.
- after deciding on your rating on both axes, you can mark your answer in the grid and a **blinking dot** will appear representing both your ratings. **One dot for two ratings: left-right RELEVANCE, bottom-up CLARITY.**
- the scale is continuous, which means you can click anywhere in the grid and thus rate using decimal values (e.g. 4.7)
- after providing your answer, you will be able **to see other participants' ratings represented as dots on the same grid**, and aggregated feedback on the right side of the 2D grid.
- You can change your ratings any time during the study period, by **moving the blinking dot on the grid**. Moreover, you are **encouraged to revisit your answers** on multiple occasions in light of other participants' answers.

Each attribute page also contains a **comments section**. Below the 2D grid you can find open text fields to provide comments or suggestions on the attribute and related sublevels. All comments are displayed anonymously. Please provide your comments in the relevant pre-defined category:

- revisions of attribute labels and definitions
- missing attributes in this group

There you can also see other participants' comments and suggestions and respond to them. Please remember to **save your comments** before leaving a page so that they can be recorded and displayed.

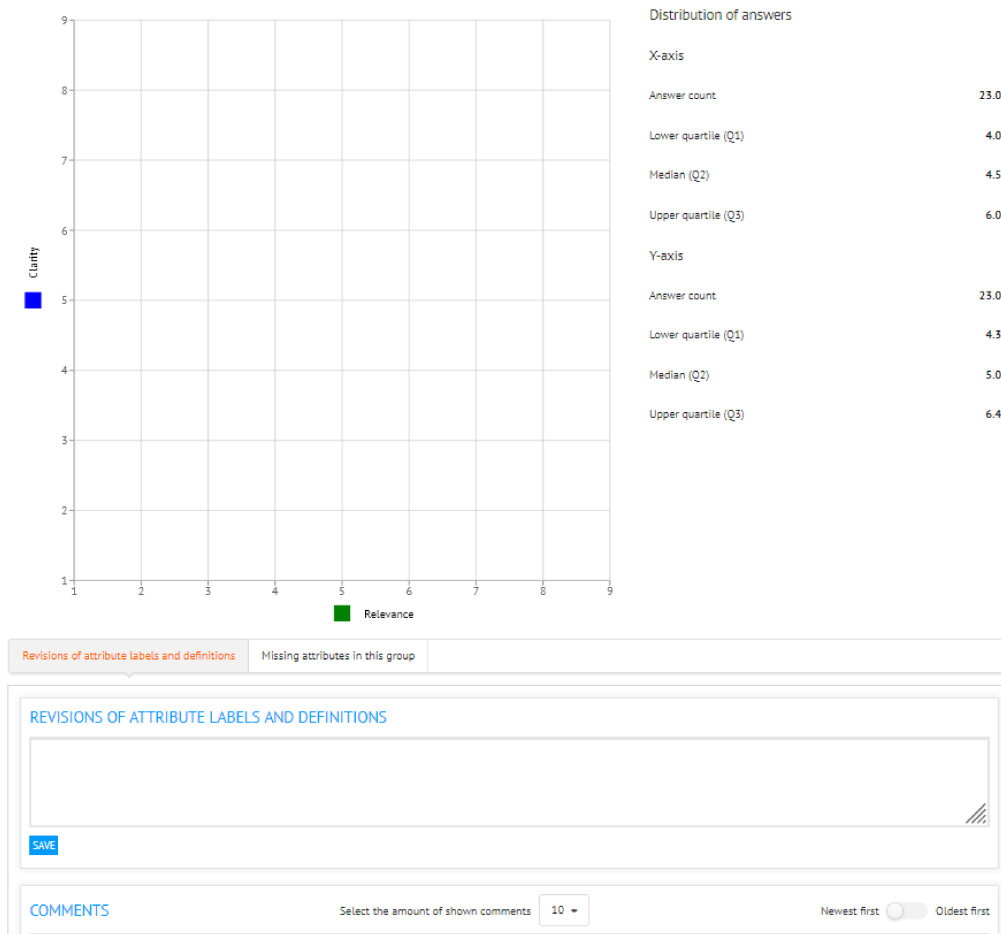

Supplement: bmjopen-2021-059674supp006.pdf [file bmjopen-2021-059674supp006.pdf]
