# Supplementary material for: Developing a medication adherence technologies repository: proposed structure and protocol for an online real-time Delphi study
Source: PubMed Central journal article supplement — BMJ Open. 2022 Apr 22;12(4):e059674. doi: 10.1136/bmjopen-2021-059674 (PMC9074304; doi:10.1136/bmjopen-2021-059674), 2022-04-22
Supplement: bmjopen-2021-059674.draft_revisions.pdf [file bmjopen-2021-059674.draft_revisions.pdf]

# BMJ Open

BMJ Open is committed to open peer review. As part of this commitment we make the peer review history of every article we publish publicly available.

When an article is published we post the peer reviewers' comments and the authors' responses online. We also post the versions of the paper that were used during peer review. These are the versions that the peer review comments apply to.

The versions of the paper that follow are the versions that were submitted during the peer review process. They are not the versions of record or the final published versions. They should not be cited or distributed as the published version of this manuscript.

BMJ Open is an open access journal and the full, final, typeset and author-corrected version of record of the manuscript is available on our site with no access controls, subscription charges or pay-per-view fees (<http://bmjopen.bmj.com>).

If you have any questions on BMJ Open's open peer review process please email [info.bmjopen@bmj.com](mailto:info.bmjopen@bmj.com)

# BMJ Open

## Developing a medication adherence technologies repository: proposed structure and protocol for an online real-time Delphi study

|                               |                                                                                                                                                                                                                                                                                                                                                                                                                                                                                                                                                                                                                                                                                                                                                                                                                                                                                                                                                                                                                                                                                                                                                                                                                                                                                                                                                                                                                                                                                                                                                                                                                                                                                                                                                                                                                                                                                                                                                                                                                              |
|-------------------------------|------------------------------------------------------------------------------------------------------------------------------------------------------------------------------------------------------------------------------------------------------------------------------------------------------------------------------------------------------------------------------------------------------------------------------------------------------------------------------------------------------------------------------------------------------------------------------------------------------------------------------------------------------------------------------------------------------------------------------------------------------------------------------------------------------------------------------------------------------------------------------------------------------------------------------------------------------------------------------------------------------------------------------------------------------------------------------------------------------------------------------------------------------------------------------------------------------------------------------------------------------------------------------------------------------------------------------------------------------------------------------------------------------------------------------------------------------------------------------------------------------------------------------------------------------------------------------------------------------------------------------------------------------------------------------------------------------------------------------------------------------------------------------------------------------------------------------------------------------------------------------------------------------------------------------------------------------------------------------------------------------------------------------|
| Journal:                      | <i>BMJ Open</i>                                                                                                                                                                                                                                                                                                                                                                                                                                                                                                                                                                                                                                                                                                                                                                                                                                                                                                                                                                                                                                                                                                                                                                                                                                                                                                                                                                                                                                                                                                                                                                                                                                                                                                                                                                                                                                                                                                                                                                                                              |
| Manuscript ID                 | bmjopen-2021-059674                                                                                                                                                                                                                                                                                                                                                                                                                                                                                                                                                                                                                                                                                                                                                                                                                                                                                                                                                                                                                                                                                                                                                                                                                                                                                                                                                                                                                                                                                                                                                                                                                                                                                                                                                                                                                                                                                                                                                                                                          |
| Article Type:                 | Protocol                                                                                                                                                                                                                                                                                                                                                                                                                                                                                                                                                                                                                                                                                                                                                                                                                                                                                                                                                                                                                                                                                                                                                                                                                                                                                                                                                                                                                                                                                                                                                                                                                                                                                                                                                                                                                                                                                                                                                                                                                     |
| Date Submitted by the Author: | 30-Nov-2021                                                                                                                                                                                                                                                                                                                                                                                                                                                                                                                                                                                                                                                                                                                                                                                                                                                                                                                                                                                                                                                                                                                                                                                                                                                                                                                                                                                                                                                                                                                                                                                                                                                                                                                                                                                                                                                                                                                                                                                                                  |
| Complete List of Authors:     | <p>Naberogj Makovec , Urska; Univerza v Ljubljani Fakulteta za farmacijo, Faculty of Pharmacy</p> <p>Goetzinger, Catherine ; Luxembourg Institute of Health, Deep Digital Phenotyping Research Unit, Department of Population Health; University of Luxembourg Faculty of Science Technology and Medicine</p> <p>Ribaut, Janette; University of Basel Faculty of Medicine, Institute of Nursing Science, Department Public Health; University Hospital Basel, Department of Theragnostic, Hematology</p> <p>Barnestein-Fonseca, Pilar; CUDECA Institute for Training and Research in Palliative Care, CUDECA Hospice Foundation, Málaga; Instituto de Investigación Biomédica de Málaga-IBIMA , Group C08: Pharma economy: Clinical and economic evaluation of medication and Palliative Care</p> <p>Hauptenthal, Frederik; Medical University of Vienna Department of Medicine II, Division of Nephrology and Dialysis</p> <p>Herdeiro, Maria; University of Aveiro, Institute of Biomedicine, Medical Sciences Department</p> <p>Grant, Sean; Indiana University Richard M Fairbanks School of Public Health, Department of Social &amp; Behavioral Sciences,</p> <p>Jácome, Cristina; University of Porto Faculty of Medicine, Department of Community Medicine, Information and Health Decision Sciences (MEDCIDS); University of Porto Faculty of Medicine, Center for Health Technology and Services Research (CINTESIS)</p> <p>Marques Roque, Fatima; Polytechnic Institute of Guarda Research Unit for Inland Development, Research Unit for Inland Development</p> <p>Smits, Dins; Riga Stradins University, Faculty of Public Health and Social Welfare, Department of Public Health and Epidemiology</p> <p>Tadic, Ivana; University of Belgrade Faculty of Pharmacy, Department of Social Pharmacy and Pharmaceutical Legislation</p> <p>Dima, Alexandra; Université Claude Bernard Lyon 1, , Research on Healthcare Performance (RESHAPE), INSERM U1290 ENABLE, Collaborators; COST Action ENABLE (CA19132)</p> |
| Keywords:                     | Health informatics < BIOTECHNOLOGY & BIOINFORMATICS, PUBLIC HEALTH, SOCIAL MEDICINE                                                                                                                                                                                                                                                                                                                                                                                                                                                                                                                                                                                                                                                                                                                                                                                                                                                                                                                                                                                                                                                                                                                                                                                                                                                                                                                                                                                                                                                                                                                                                                                                                                                                                                                                                                                                                                                                                                                                          |
|                               |                                                                                                                                                                                                                                                                                                                                                                                                                                                                                                                                                                                                                                                                                                                                                                                                                                                                                                                                                                                                                                                                                                                                                                                                                                                                                                                                                                                                                                                                                                                                                                                                                                                                                                                                                                                                                                                                                                                                                                                                                              |

1  
2  
3  
4  
5  
6  
7  
8  
9  
10  
11  
12  
13  
14  
15  
16  
17  
18  
19  
20  
21  
22  
23  
24  
25  
26  
27  
28  
29  
30  
31  
32  
33  
34  
35  
36  
37  
38  
39  
40  
41  
42  
43  
44  
45  
46  
47  
48  
49  
50  
51  
52  
53  
54  
55  
56  
57  
58  
59  
60

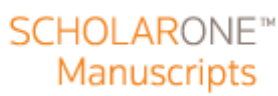

## Developing a medication adherence technologies repository: proposed structure and protocol for an online real-time Delphi study

**Urska Nabergoj Makovec** (ORCID ID: 0000-0001-5194-3314)

*University of Ljubljana, Faculty of Pharmacy, Department of Social Pharmacy, Ljubljana, Slovenia*

[urska.nabergoj.makovec@ffa.uni-lj.si](mailto:urska.nabergoj.makovec@ffa.uni-lj.si)

**Catherine Goetzinger** (ORCID ID :0000-0002-6377-1078)

*Deep Digital Phenotyping Research Unit, Department of Population Health, Luxembourg Institute of Health, Strassen, Luxembourg.*

*University of Luxembourg, Faculty of Science, Technology and Medicine, Luxembourg*

[catherine.goetzinger@lih.lu](mailto:catherine.goetzinger@lih.lu)

**Janette Ribaut** (ORCID ID: 0000-0003-0654-4052)

*Institute of Nursing Science, Department Public Health, Faculty of Medicine, University of Basel, Switzerland & Department of Theragnostic, Hematology, University Hospital of Basel, Switzerland*

[janette.ribaut@unibas.ch](mailto:janette.ribaut@unibas.ch)

**Pilar Barnestein-Fonseca** (ORCID ID 0000-0003-2767-8017)

*CUDECA Institute for Training and Research in Palliative Care, CUDECA Hospice Foundation, Málaga, Spain.*

*Instituto de Investigación Biomédica de Málaga-IBIMA Group C08: Pharma economy: Clinical and economic evaluation of medication and Palliative Care, Málaga, Spain.*

[pilar.barnestein@ibima.eu](mailto:pilar.barnestein@ibima.eu)

**Frederik Haupenthal** (ORCID ID: 0000-0002-7708-9045)

*Division of Nephrology and Dialysis, Department of Medicine II, Medical University of Vienna, Austria*

[frederik.haupenthal@meduniwien.ac.at](mailto:frederik.haupenthal@meduniwien.ac.at)

**Maria Teresa Herdeiro** (ORCID ID: 0000-0002-0500-4049)

*Institute of Biomedicine, Medical Sciences Department, University of Aveiro, Aveiro, Portugal.*

[teresaherdeiro@ua.pt](mailto:teresaherdeiro@ua.pt)

**Sean Patrick Grant** (ORCID: 0000-0002-7775-3022)

*Department of Social & Behavioral Sciences, Richard M. Fairbanks School of Public Health, Indiana University, Indianapolis, United States of America*

[spgrant@iu.edu](mailto:spgrant@iu.edu)

**Cristina Jácome** (ORCID ID: 0000-0002-1151-8791)

*Department of Community Medicine, Information and Health Decision Sciences (MEDCIDS), Faculty of Medicine, University of Porto, Porto, Portugal*

*Center for Health Technology and Services Research (CINTESIS), Faculty of Medicine, University of Porto, Porto, Portugal*

[cristinajacome.ft@gmail.com](mailto:cristinajacome.ft@gmail.com)

**Fátima Roque** (ORCID ID: 0000-0003-0169-3788)

*Research Unit for Inland Development, Polytechnic of Guarda, Guarda, Portugal.*

[froque@ipg.pt](mailto:froque@ipg.pt)

**Dins Smits** (ORCID: 0000-0001-5514-7374)

*Faculty of Public Health and Social Welfare, Department of Public Health and Epidemiology, Riga Stradins University, Riga, Latvia*

[dins.smits@rsu.lv](mailto:dins.smits@rsu.lv)

**Ivana Tadic** (ORCID: 0000-0001-5488-9261)

*University of Belgrade, Faculty of Pharmacy, Department of Social Pharmacy and Pharmaceutical Legislation, Belgrade, Serbia*

[ivana.tadic@pharmacy.bg.ac.rs](mailto:ivana.tadic@pharmacy.bg.ac.rs)

**Alexandra Lelia Dima** (ORCID: 0000-0002-3106-2242)

1  
2  
3 *Université Claude Bernard Lyon 1, Research on Healthcare Performance (RESHAPE), INSERM U1290, Lyon, France*  
4 [alexandra.dima@univ-lyon1.fr](mailto:alexandra.dima@univ-lyon1.fr)  
5

6  
7 and **European Network to Advance Best Practices and Technology on Medication Adherence**  
8 **(ENABLE)**  
9

10  
11 **Corresponding author:**  
12

13 Urska Nabergoj Makovec  
14 *ORCID ID: 0000-0001-5194-3314*  
15 *University of Ljubljana, Faculty of Pharmacy, Department of Social Pharmacy,*  
16 *Askerceva 7*  
17 *1000 Ljubljana, Slovenia*  
18 Telephone: +386 1 4769 565  
19 [urska.nabergoj.makovec@ffa.uni-lj.si](mailto:urska.nabergoj.makovec@ffa.uni-lj.si)  
20  
21  
22  
23

24 **Key words:** health technology, medication adherence, Delphi study, stakeholder engagement, digital  
25 health, behavioural science, implementation science  
26  
27  
28  
29

30  
31 **Word count:**  
32

33 Number of words: 4052

34 Abstract: 249

35 Strengths and limitations: 153  
36  
37  
38  
39  
40  
41  
42  
43  
44  
45  
46  
47  
48  
49  
50  
51  
52  
53  
54  
55  
56  
57  
58  
59  
60

## Article Summary

### Abstract

**Introduction:** An online interactive repository of available technologies may facilitate their selection and adoption by different stakeholders. Developing a repository is among the main objectives of the ENABLE COST Action (CA19132). However, meeting the needs of diverse stakeholders requires careful consideration of the repository structure.

**Methods and analysis:** A real-time online Delphi study by stakeholders from 39 countries with research, practice, policy, patient representation and technology development backgrounds will be conducted. Eleven ENABLE members from 9 European countries formed an interdisciplinary steering committee to develop the repository structure, prepare study protocol and perform it. Definitions of medication adherence technologies and their attributes were developed iteratively through literature review, discussions within the steering committee and ENABLE Action members, following ontology development recommendations. Three domains (*product and provider information (D1)*, *medication adherence descriptors (D2)* and *evaluation and implementation (D3)*) branching in 13 attribute groups are proposed: *product and provider information, target use scenarios, target health conditions, medication regimen, medication adherence management components, monitoring/measurement methods and targets, intervention modes of delivery, target behaviour determinants, behaviour change techniques, intervention providers, intervention settings, quality indicators and implementation indicators*. Stakeholders will evaluate the proposed definition and attributes' relevance, clarity and completeness and have multiple opportunities to reconsider their evaluations based on aggregated feedback in real-time. Data collection will stop when the predetermined response rate will be achieved. We will quantify agreement and perform analyses of process indicators on the whole sample and per stakeholder group.

**Ethics and dissemination:** Ethical approval for the COST ENABLE activities was granted by the Malaga Regional Research Ethics Committee. The Delphi protocol was considered compliant regarding data protection and security by the Data Protection Officer from University of Basel. Findings from the Delphi study will form the basis for the ENABLE repository structure and related activities.

### Strengths and limitations of this study

- The diverse expertise and geographical spread of the ENABLE COST Action members (39 European countries) and their wider professional network represents a unique and timely opportunity to develop a repository of medication adherence technologies that meets the needs of a diverse audience.
- The scope and content of the Delphi survey represent the work of extensive literature review combined with multidisciplinary expertise of the steering committee.
- The real-time Delphi approach provides improved efficiency of the process, shortens the time of study completion and is particularly suitable for managing larger groups and including people from different geographic locations.
- The Delphi protocol will use state of the art methodology to measure agreement and predetermine agreement/consensus criteria as well as stability of responses.
- The real-time approach requires specialized software, which limits the range of possible survey configurations and raw data availability for detailed process analyses and requires relatively elaborate instructions for participants, which may increase participation burden.

## Introduction

Taking medication as prescribed often proves difficult for people when managing their health, particularly in the long term.<sup>1</sup> Medication adherence is suboptimal in numerous chronic conditions<sup>2 3</sup> and has a negative impact on chronic disease management, patient's general health status, quality of life, working ability and health care costs.<sup>2 4 5</sup> Research on medication adherence has expanded and contributed to raised awareness of the prevalence of suboptimal adherence and how it affects health outcomes. Digital technologies have increasingly gained interest as new interventions for supporting medication adherence have been developed. A diversity of technologies has been proposed, from electronic monitoring devices to mobile applications, to support medication adherence measurements and empower patients with their disease management. However, the rapidly expanding offer of medication adherence technologies (MATech) makes it increasingly difficult to access, evaluate, and compare different technologies to make informed decisions and select appropriate tools for specific clinical or research needs. In a 2018 review by Ahmed et al.<sup>6</sup>, 5881 medication adherence apps were identified on Google Play and Apple App Stores. However, most of them lacked evidence of effectiveness and didn't involve healthcare professionals (HCPs) during their development.<sup>6</sup> Lack of collaboration between stakeholders results in a limited number of developed MATech actually being implemented into the healthcare systems and used daily by HCPs and/or patients.<sup>7</sup> Furthermore, due to differences in healthcare systems across countries, healthcare organisations and reimbursement processes, harmonization of implementation strategies are lagging behind, which further delays adoption of best practices across countries.<sup>4 7</sup>

The ENABLE COST Action ('European Network to Advance Best practices & technoLOGY on medication adherence', CA19132)<sup>8</sup> was initiated by experts in medication adherence and digital technologies to fill these gaps regarding evidence and implementation of MATech within healthcare systems. ENABLE aims to raise awareness of available technologies, expand multidisciplinary knowledge on medication adherence at multiple levels, accelerate knowledge translation to clinical practice, and collaborate towards economically viable implementation of best practices and technologies across European healthcare systems. These objectives are being pursued within a 4-year period (2020-2023), by three distinct and interrelated working groups (WGs) that map best practices available (WG1), identify and showcase adherence technologies (WG2), and identify suitable reimbursement strategies for implementation in healthcare systems (WG3), supported transversally by a WG4 coordinating communication and dissemination. At present, the ENABLE Action includes a large interdisciplinary network of experts in medication adherence from 39 European countries.<sup>8</sup>



1  
2  
3 Effective implementation of technology-supported healthcare has been facilitated by centralisation of  
4 information in public repositories or 'solution showrooms', where users can search for technologies  
5 that meet their specific requirements.<sup>9</sup> Several such repositories already exist in the field of digital  
6 health, including medication adherence (e.g. NHS app Library<sup>10</sup>, MyHealthApps<sup>11</sup>, InterventieNet<sup>12</sup>,  
7 GGD AppStore<sup>13</sup>, DIGA<sup>14</sup>, Weisse Liste<sup>15</sup>), but are limited to single countries or types of technology and  
8 none represents a comprehensive resource to facilitate adoption of appropriate MATech across health  
9 systems. Therefore, ENABLE sets out to develop and maintain a public online repository of MATech  
10 where patients, HCPs, researchers, and healthcare managers would be able to access and select  
11 technologies for adoption in their adherence management activities.<sup>8</sup> To meet this goal, the ENABLE  
12 repository would need to represent a flexible knowledge management system that would include  
13 information relevant to the needs of different stakeholders in a user-friendly format. In medical  
14 informatics, knowledge management relies on standardized terminologies, classifications and  
15 ontologies to record, share and use data on healthcare research and practice. These standards specify  
16 the types of information to encode in the form of distinct 'entities' representing objects or phenomena  
17 in the real world and their properties ('attributes'), thus enabling knowledge generation through  
18 inference and learning.<sup>16</sup> Adoption of evidence-based health innovations is also facilitated by these  
19 common standards, as new technologies need to interact with existing ecosystems in terms of both  
20 data interoperability and communicating with potential users in appropriate domain-specific  
21 language.<sup>17</sup>

22  
23  
24  
25  
26  
27  
28  
29  
30  
31  
32  
33  
34  
35  
36  
37 The field of medication adherence is highly interdisciplinary, therefore a useful repository would cross  
38 multiple knowledge domains and align with several standards, whether medical (e.g., World Health  
39 Organisation International Classification of Disease; WHO ICD<sup>18</sup>), behavioural (e.g., the Behaviour  
40 Change Intervention Ontology; BCIO<sup>19 20</sup>), or technical (e.g., WHO Classification of Digital Health  
41 Interventions; WHO DHIs<sup>21</sup>). Moreover, stakeholder involvement would need to be at the core of this  
42 development process, to ensure its content is relevant, clear and complete, and meets community  
43 needs.<sup>22</sup> The diverse and geographically spread ENABLE membership and their wider professional  
44 network represents a unique and timely opportunity to conduct this work. Considering these quality  
45 standards and following methodological recommendations,<sup>22-24</sup> the initial version of the repository  
46 structure was prepared and a stakeholder consultation process is proposed to explore their views and  
47 level of agreement on the relevance, clarity and completeness of the initial version.<sup>22 23</sup> The resulting  
48 improved version would represent the structure of the ENABLE repository, which will be tested and  
49 populated in subsequent steps with users and developers of available technologies.

## Methods and analysis

### Steering committee

A steering committee (SC) was established within the COST ENABLE WG2 to coordinate and perform the work. The committee includes 11 ENABLE members from 9 countries in the following areas of expertise: adherence research and education, clinical practice, policy making and technology development. Members are responsible for: (i) determination of the repository scope and framework of attributes defining repository structure, (ii) preparation of the Delphi protocol, (ii) configuration and piloting the Delphi survey, (iv) selection and invitation of stakeholders to participate in the study, (v) moderating study performance via the online tool and (vi) analysis and interpretation of results.

### Determining the repository scope and framework of attributes defining its structure

The determination of scope and development of the attributes' labels with definitions aimed to align with ontology development procedures as described by Wright et al.<sup>24</sup> and follow a stakeholder engagement methodology as described by Norris et al.<sup>22</sup> and Khodyakov et al.<sup>25</sup>. The principles of ontology development, actions taken when generating the framework of attributes and examples of how these principles are applied in the ENABLE project are presented in Table 1. Stakeholder engagement is primarily achieved through the proposed real-time Delphi study, which is described in more detail in the next sections.

*Table 1. Principles of ontology development after Wright et al.<sup>24</sup> and actions taken in the ENABLE project.*

| Principles                                                                | How they have been applied in the ENABLE project                                                                                                                     |
|---------------------------------------------------------------------------|----------------------------------------------------------------------------------------------------------------------------------------------------------------------|
| <i>Have specified scope and scientifically sound and relevant content</i> | Selection of established definitions for delimiting the scope, consultation of stakeholders, piloting for data input and platform search.                            |
| <i>Meet the needs of community of users</i>                               | Consultation of stakeholders, steering committee and Action members sampled from the user community and including diverse areas of expertise.                        |
| <i>Enabling users to understand the meaning of entities</i>               | Naming examples of existing ontologies, piloting Delphi survey, technology description form, user form and platform use.                                             |
| <i>Be logically consistent</i>                                            | Using the methodology recommended for attribute description, checking consistency via Ontology Web Language (OWL).                                                   |
| <i>Be interoperable with existing ontologies</i>                          | Adopting attributes and labels available in existing ontologies and classifications, expert input on additional attributes and recommendations for interoperability. |
| <i>Reflect changes in scientific consensus</i>                            | Repository in open access, sustainability plan developed                                                                                                             |

---

*and remain accurate over time*

with Action members and stakeholders.

---

### Scope and definition of MATech

Four established definitions were used to define the scope of repository and set the framework of attributes: (i) *WHO definition of health technologies*<sup>26</sup>; (ii) *the ABC definition of medication adherence*<sup>1</sup>; (iii) *the WHO definition of adherence to long-term therapies*<sup>2</sup> to highlight the importance of shared decision-making between the patient and the healthcare team and (iv) *the definition of best practice in healthcare proposed by the European Commission* to guide improvements in European health systems.<sup>27</sup> The information in this definition denotes evidence on safety, efficacy, effectiveness, cost-effectiveness, appropriateness, social and ethical values, and quality of the health care interventions.

Therefore, we propose to define ***Medication Adherence Technologies (MATech) as devices, procedures or systems developed based on evidence to support patients to take their medications as agreed with healthcare providers (i.e., to initiate, implement, and persist with the medication regimen).***

- **devices, procedures or systems** emphasize the inclusion of all technologies, irrespective of their mode of delivery (whether based on electronic or printed supports, delivered through human interaction, or a combination of these) with the aim to construct a comprehensive repository in which users can identify diverse technologies to fit their potentially diverse needs.
- **developed based on evidence** encompass the requirement of evidence/research that supports at least a potential contribution to either measurement or intervention on medication adherence (e.g., validation or pilot studies). Thus, technologies that are not (yet) supported by evidence (e.g., development and testing stages), or clinical practice protocols without an evidence base on at least one aspect (safety, efficacy, effectiveness, cost-effectiveness, appropriateness, social and ethical values or quality), will not be (yet) included in the repository until such evidence is produced and reported.
- **support patients to take their medications as agreed with the healthcare providers (i.e. to initiate, implement, and persist with the medication regimen)** encompass the contribution of the technology to medication adherence management – either directly in patients' self-management, or by supporting professionals to offer such services to patients through all phases of medication adherence. Thus, technologies that focus on other medication management goals, but do not target adherence specifically would be out of scope for this repository.

1  
2  
3 Furthermore, the technologies included would need to be described in terms of their technical  
4 characteristics and validation, their behaviour change content, format, and context, as well as the  
5 characteristics facilitating appropriate implementation in care processes. Hence, evidence from  
6 behaviour,<sup>19 28</sup> implementation<sup>29 30</sup> and computer sciences<sup>18 21 31 32</sup> informed the initial scope and  
7 attributes framework to ensure key features, such as user-centeredness, trustworthiness/credibility,  
8 accuracy & relevance of the presented information, tailoring to the needs of different users and  
9 interoperability with existing evidence and other sources of information on healthcare technologies.  
10  
11  
12  
13  
14

### 15 16 **Framework of attributes**

17  
18 An initial list of attributes was developed based on a literature review and knowledge from the ENABLE  
19 members activities such as (i) an ongoing systematic review of e-health interventions on medication  
20 adherence for chronic conditions,<sup>33</sup> (ii) a checklist of e-health quality criteria under development,<sup>34</sup> (iii)  
21 Interventienet.nl - platform showcasing evidence-based medication adherence interventions in the  
22 Netherlands<sup>12</sup> and (iv) the ABC taxonomy – consensus-based terminology and definitions of  
23 medication adherence<sup>1</sup>.  
24  
25  
26  
27  
28  
29

30 The initial list was presented to the SC and discussed via several videoconferences to generate a more  
31 detailed list of attributes grouped on several themes. Each theme was further elaborated by a  
32 subgroup of 2 SC members following a standard format including labels and adherence-related  
33 definitions. We adopted the approach from BCIO<sup>19</sup>, where related attributes were searched in topic  
34 relevant ontologies/taxonomies/classifications and original definitions and codes were added. The  
35 reasons for the choice of certain attributes and labels were detailed for each attribute group. The  
36 proposed framework of attributes is graphically presented in Figure 1, while rationale and sources  
37 used to define the labels for the MATech repository are presented in Table 2.  
38  
39  
40  
41  
42  
43  
44

45 The final proposed framework consists of three domains (i) **product and provider information (D1)**,  
46 (ii) **medication adherence descriptors (D2)** and (iii) **evaluation and implementation (D3)** aligning with  
47 the three elements of the Donabedian health care model (i) structure, (ii) process and (iii) outcomes.<sup>35</sup>  
48 The domains branch in 13 attributes groups, which then branch further to up to four sublevels of  
49 attributes. Each attribute is described with a label and related definition.  
50  
51  
52  
53  
54

55 *Figure 1. The interactive graph showing framework of attributes for MATech (“the MATech Tree”).*  
56  
57  
58  
59  
60

1  
2  
3 Table 2. The proposed framework of attributes used in the MATEch repository. Each group is presented with the core question it is addressing, rationale and  
4  
5  
6  
7  
8  
9  
10  
11  
12  
13  
14  
15  
16  
17  
18  
19  
20  
21  
22  
23  
24  
25  
26  
27  
28  
29  
30  
31  
32  
33  
34  
35  
36  
37  
38  
39  
40  
41  
42  
43  
44  
45  
46

2 sources used to create labels within the group.

| Domain and attribute group                             | Core question                                                                                                         | Rationale                                                                                                                                                                                                                                                                                                                                                                                                                                                                                                                                                        | Existing ontology/ taxonomy/ classification used and adapted                                                                                                                                                                                                                                             |
|--------------------------------------------------------|-----------------------------------------------------------------------------------------------------------------------|------------------------------------------------------------------------------------------------------------------------------------------------------------------------------------------------------------------------------------------------------------------------------------------------------------------------------------------------------------------------------------------------------------------------------------------------------------------------------------------------------------------------------------------------------------------|----------------------------------------------------------------------------------------------------------------------------------------------------------------------------------------------------------------------------------------------------------------------------------------------------------|
| <b>D1 (D1.1)</b> Product and provider information      | <b>What product does the entry refer to, who provides it, who entered its description in the repository and when?</b> | Each entry in the ENABLE repository will refer to a unique product, which will be identified with a unique ID, provided by a unique organisation (manufacturer, developer) with its own unique ID and related metadata (e.g., date of entry, verification process, etc.) to present the identity of the described MATEch and its provider.                                                                                                                                                                                                                       | <ul style="list-style-type: none"> <li>Ontology for medical technology innovation in healthcare centres by ITEMAS<sup>36</sup> – only concepts referring to products and their providers were used and adapted.</li> </ul>                                                                               |
| <b>D2.1</b> Target use scenario                        | <b>What use scenarios and types of users is the technology intended for?</b>                                          | We can distinguish two general categories of users and their characteristics that might influence the choice of technology: (i) <i>self-management use</i> (patients and caregivers) - labels describing patients' characteristics or their condition (age, functional status, (health) literacy, etc.); (ii) <i>adherence support use</i> by healthcare or social care providers and health system managers, who can initiate a search for MATEch to integrate in their practice. The provider and the setting are also the focus of separate attribute groups. | <ul style="list-style-type: none"> <li>Systematized Nomenclature of Medicine, Clinical Terms (SNOMED-CT)<sup>32</sup>,</li> <li>WHO International Classification of Functioning, Disability and Health (ICF)<sup>37</sup></li> <li>The WHO DHI<sup>21</sup></li> <li>ABC Taxonomy<sup>1</sup></li> </ul> |
| <b>D2.2</b> Target health conditions                   | <b>Which health conditions could the technology be used for as part of adherence support?</b>                         | MATEch are usually developed and validated to be used in one or several clinical domains and potential users may search for technologies applicable to the health condition(s) they aim to manage. Since our stakeholders also include lay individuals, special focus was put on using simplified language to avoid misunderstandings and knowledge gaps.                                                                                                                                                                                                        | <ul style="list-style-type: none"> <li>The International Classification of Disease (ICD-11)<sup>18</sup></li> <li>The Health Research Classification System (HRCS) from the UK clinical research association<sup>38</sup></li> </ul>                                                                     |
| <b>D2.3</b> Medication regimen                         | <b>What type of medication regimen(s) is the technology intended for?</b>                                             | Medication regimen can take different schematic forms and be of varying complexity, which may influence the complexity and extent of medication adherence. MATEch may be developed for medications with different characteristics, hence the repository users should be able to indicate the type of regimen to find a MATEch that fits its specific characteristics.                                                                                                                                                                                            | <ul style="list-style-type: none"> <li>SNOMED-CT<sup>32</sup></li> <li>National Cancer Institute Thesaurus (NCIT)<sup>39</sup></li> <li>Medical Subject Headings (MeSH)<sup>40</sup></li> </ul>                                                                                                          |
| <b>D2.4</b> Medication adherence management components | <b>What adherence management types and phases does the technology target?</b>                                         | Management of adherence entails two management type, e.g., monitoring/measurement (D2.4.2.A) and support/intervention (D2.4.2.B) by any stakeholder, including the patient himself. Both elements may require different approaches depending on the targeted phase of adherence (D2.4.1).                                                                                                                                                                                                                                                                        | <ul style="list-style-type: none"> <li>ABC Taxonomy<sup>1</sup></li> </ul>                                                                                                                                                                                                                               |

|                                                                              |                                                                                                                                                                                     |                                                                                                                                                                                                                                                                                                                                                                                                                                                                                                                                                      |                                                                                                                                                                                                                                                                                                                                                                                                                |
|------------------------------------------------------------------------------|-------------------------------------------------------------------------------------------------------------------------------------------------------------------------------------|------------------------------------------------------------------------------------------------------------------------------------------------------------------------------------------------------------------------------------------------------------------------------------------------------------------------------------------------------------------------------------------------------------------------------------------------------------------------------------------------------------------------------------------------------|----------------------------------------------------------------------------------------------------------------------------------------------------------------------------------------------------------------------------------------------------------------------------------------------------------------------------------------------------------------------------------------------------------------|
| <p><b>D2.4.2.A</b><br/><i>Monitoring/measurement methods and targets</i></p> | <p><b><i>If measurement is a component, what measurement methods does the technology use and what do they measure?</i></b></p>                                                      | <p>A broad range of measurement methods for adherence are available. In addition to adherence behaviours, measurement can also target adherence determinants, other self-management behaviours and outcome measures (e.g., HRQoL). Therefore, we have selected a range of measurement models as well as a selection of self-management behaviours to offer the possibility to describe technologies from a measurement perspective.</p>                                                                                                              | <ul style="list-style-type: none"> <li>• SNOMED-CT<sup>32</sup></li> <li>• extensive existing literature<sup>2 3 41</sup> and own (SC's) methodological know how</li> <li>• Train4Health (T4H) behaviour change competency framework<sup>42</sup></li> <li>• BCIO<sup>19</sup></li> </ul>                                                                                                                      |
| <p><b>D2.4.2.B.1</b><br/><i>Intervention modes of delivery</i></p>           | <p><b><i>If intervention is a component, how is it delivered to its users?</i></b></p>                                                                                              | <p>Mode of delivery is <i>'physical or informational medium through which a given behaviour change intervention is provided'</i><sup>19</sup>, can affect the intervention effectiveness. Although digitalization has entered in all aspects of everyday life, the analogue mode is still very relevant. This is especially true within the elderly, who on one hand require more support in medication adherence<sup>43</sup> and are on the other hand less digitally-literate.<sup>44</sup> Hence, the repository should encompass all modes.</p> | <ul style="list-style-type: none"> <li>• BCIO<sup>19</sup>; specifically a taxonomy of modes of delivery of BCI<sup>45</sup></li> </ul>                                                                                                                                                                                                                                                                        |
| <p><b>D2.4.2.B.2</b> <i>Target behaviour determinants</i></p>                | <p><b><i>If intervention is a component, what reasons for non-adherence can the technology help address?</i></b></p>                                                                | <p>The MATech can address different reasons for non-adherence, defined as determinants of behaviour, which can be non-modifiable or modifiable.<sup>2 19 46</sup> Individual-level and modifiable determinants are encompassed as capability (psychological and physical), opportunity (social and physical), and motivation (reflective and automatic), also known as the COM-B model.<sup>47</sup></p>                                                                                                                                             | <ul style="list-style-type: none"> <li>• Capability, Opportunity, Motivation and Behaviour (COM-B) model and Behaviour Change Wheel<sup>47</sup></li> <li>• Theoretical Domains Framework (TDF)<sup>48</sup></li> <li>• BCIO<sup>19</sup>, specifically The Mechanisms of Action (MoA) Ontology<sup>49 50</sup></li> <li>• International Classification of Health Interventions (ICHI)<sup>31</sup></li> </ul> |
| <p><b>D2.4.2.B.3</b><br/><i>Behaviour change techniques</i></p>              | <p><b><i>If intervention is a component, what are the 'active ingredients' present in the technology that may trigger change in the reasons for non-adherence targeted?</i></b></p> | <p>To trigger/support change in a health behaviour interventions act by generating change in determinants of the targeted behaviour. The 'active ingredients' in these interventions are labelled <i>'behaviour change techniques'</i> (BCTs). We included only user-level BCTs (i.e., BCTs that provide support to medication users) and mapped them according to the COM-B model and across domains.<sup>48</sup> If considered relevant, HCPs level or system-level BCT can be included in the future</p>                                         | <ul style="list-style-type: none"> <li>• Behaviour change technique (BCT) taxonomy<sup>28 51</sup></li> <li>• Train4Health (T4H) behaviour change competency framework<sup>42</sup></li> <li>• Cards for Change (C4C)<sup>52 53</sup></li> </ul>                                                                                                                                                               |
| <p><b>D2.4.2.B.4</b><br/><i>Intervention providers</i></p>                   | <p><b><i>If intervention is a component, who delivers the intervention to users?</i></b></p>                                                                                        | <p>The provider of intervention is a role played by a person, population or organization that provides/delivers an intervention. This includes their occupational role and type of relatedness. In medication adherence, the provider is often HCP, hence the quality of the <i>HCP-patient</i> relationships (communication skills, collaborative decision making, trust in the HCP, HCPs' cultural competences) correlate with patients' adherence.<sup>54</sup></p>                                                                               | <ul style="list-style-type: none"> <li>• BCIO<sup>19</sup>, specifically Intervention Source Ontology<sup>55</sup></li> <li>• Gender, Sex, and Sexual Orientation ontology (GSSO)<sup>56</sup></li> </ul>                                                                                                                                                                                                      |



|                                                                      |                                                                                                                                          |                                                                                                                                                                                                                                                                                                                                                                                                                                                                                                                                                                                                                                                                                                                                                                                                                  |                                                                                                                                                                                                                                                                                                                                                                                                                              |
|----------------------------------------------------------------------|------------------------------------------------------------------------------------------------------------------------------------------|------------------------------------------------------------------------------------------------------------------------------------------------------------------------------------------------------------------------------------------------------------------------------------------------------------------------------------------------------------------------------------------------------------------------------------------------------------------------------------------------------------------------------------------------------------------------------------------------------------------------------------------------------------------------------------------------------------------------------------------------------------------------------------------------------------------|------------------------------------------------------------------------------------------------------------------------------------------------------------------------------------------------------------------------------------------------------------------------------------------------------------------------------------------------------------------------------------------------------------------------------|
| <p><b>D2.4.2.B.5</b><br/><i>Intervention settings</i></p>            | <p><b><i>If intervention is a component, where is the service for improving adherence delivered?</i></b></p>                             | <p>Setting is the social and physical environment in which the technology is used to manage medication adherence. Implementation<sup>29</sup> and behavioural<sup>19</sup> science emphasize the importance of understanding and describing the environment in which a certain intervention is delivered as it can significantly influence its outcomes. In addition, not every intervention is applicable or transferable to every setting. We can distinguish between physical and virtual settings as well as the possibility of applying the intervention in any setting.</p>                                                                                                                                                                                                                                | <ul style="list-style-type: none"> <li>• BCIO<sup>19</sup>, specifically Intervention Setting Ontology<sup>57</sup></li> <li>• Consolidated framework for advancing implementation science (CFIR)<sup>29</sup></li> </ul>                                                                                                                                                                                                    |
| <p><b>D3.1</b> <i>Quality indicators</i></p>                         | <p><b>How does the technology meet key quality indicators from different perspectives?</b></p>                                           | <p>Quality indicators (QI) are standardized, evidence-based, and measurable items for monitoring and evaluating the quality of healthcare performance.<sup>58</sup> They describe the structure, process and outcomes of care<sup>35</sup> and based on them the standards and review criteria are developed. The target audience of the repository is very diverse and with specific individual needs related to MATech. Thus, we decided to group quality indicators according to their different purposes of use (e.g., general, research, decision making, use).</p>                                                                                                                                                                                                                                         | <ul style="list-style-type: none"> <li>• A checklist of e-health quality criteria (under development)<sup>34</sup></li> <li>• Mobile Application Rating Scale (MARS)<sup>59</sup></li> <li>• Consort-EHEALTH guideline<sup>60</sup></li> <li>• Health Technology Assessment (HTA) Core Model, version 3.0<sup>61</sup></li> <li>• O'Rourke et al. The new definition of health technology assessment<sup>62</sup></li> </ul> |
| <p><b>D3.2</b><br/><i>Implementation outcomes and strategies</i></p> | <p><b>What implementation outcomes and strategies are needed and available for adopting this technology in the intended setting?</b></p> | <p>Implementation sciences provides knowledge on how to facilitate the adoption and use of technologies in real-world settings. The development of MATech often starts without considering the actual use in real-world setting, which prevents successful adoption and scaling up into clinical care.<sup>63</sup> Three implementation outcomes were selected for ENABLE repository: acceptability; feasibility and sustainability to target early, mid and late implementation phases. In addition, eight implementation strategies were selected and adapted to present information on training users for working with MATech, availability of education materials, expertise needed to use the MATech previous implementation experiences, financial, accreditation and other legal aspects of the use.</p> | <ul style="list-style-type: none"> <li>• Proctor et al. Outcomes for Implementation Research<sup>64</sup></li> <li>• Consolidated framework for advancing implementation science (CFIR)<sup>29</sup></li> <li>• The Expert Recommendations for Implementing Change (ERIC)<sup>65</sup></li> <li>• Interventienet.nl<sup>12</sup></li> </ul>                                                                                  |

## 4 Choice and description of the study design

5 We will perform an online real-time Delphi (RT-Delphi) survey to explore the level of agreement on the  
6 MATech definition and relevance, clarity and completeness of the proposed framework of attributes  
7 defining the repository structure and gain a deeper insight into stakeholders' distinct needs and  
8 requirements. The Delphi process is a flexible iterative process to consult and/or reach consensus  
9 among a group of people on a particular topic.<sup>66 67</sup> The key characteristics of a Delphi study are  
10 anonymity, iteration, controlled feedback, and statistical description of group response.<sup>68</sup> The RT-  
11 Delphi approach was developed by Gordon and Pease to improve efficiency of the process and shorten  
12 the time of performance.<sup>69</sup> Since then, several online tools have been developed to facilitate the RT-  
13 Delphi design<sup>70</sup> and literature describing the use of RT-Delphi and comparison with the traditional  
14 multi-round Delphi approach is growing.<sup>23 71-74</sup> In contrast to the traditional Delphi, the RT approach is  
15 round-less and offers a constant iteration by providing immediate (real-time) individual and  
16 aggregated feedback. Based on new information participants can re-think and modify their answers,  
17 which could lead to reconciliation of opinions and eventually to consensus. Participants are  
18 encouraged to re-visit and engage in the survey several times during the study period.<sup>69 70 72 74</sup> In  
19 comparison with the traditional approach, the RT approach encompasses all key Delphi features<sup>73</sup> and  
20 is similar from all key perspectives.<sup>23 71 73 74</sup> Furthermore, the RT approach is particularly suitable for  
21 managing larger groups, decreases moderators' workload, simplifies inclusion of people from different  
22 geographic locations and can be leaner in costs.<sup>23 69 74</sup> On the other hand, the approach requires specific  
23 software, which can sometimes be rigid in terms of survey configuration and analysis, contributes to  
24 increases study costs and requires specific instructions for participants.<sup>70 74</sup> Acknowledging the  
25 potential challenges, the advantages of the approach outweighed them and supported a decision to  
26 adopt the RT approach for our Delphi study.

## 28 Sampling and sample size

29 We aim to include stakeholders from the 39 countries, participating in the COST ENABLE covering 5  
30 different backgrounds per country: (i) adherence and eHealth research (measurement, intervention  
31 development, implementation science, health economics), (ii) clinical care (specialist and primary care  
32 practitioners providing medication adherence support), (iii) patient representation (age > 18 years),  
33 (iv) policy making and (v) technology development. Hence the targeted sample size is at least 195  
34 panellists to be invited in the study.

36 Purposive sampling will be applied to identify potential panellists. First, requests will be sent through  
37 the ENABLE Cost Action membership list to identify suitable candidates from all countries. ENABLE



1  
2  
3 38 members will provide the name, background, and e-mail for every potential candidate. Participants'  
4 39 e-mails will be entered in the online platform (eDelphi.org – Delphi method software<sup>75</sup>), which will  
5 40 enable anonymity in further steps, i.e., participant's activities and or/answers given on the platform  
6 41 will not be linked to personal data. All communication with the panellists (invitation, reminders, etc.)  
7 42 will be performed through the platform. If more candidates from the same background and country  
8 43 will be suggested, we will invite all candidates to increase the likelihood of achieving the planned  
9 44 sample size. If the expressed interest exceeds the planned sample size, purposeful sampling will be  
10 45 performed to ensure variation in expertise, country, and balance other characteristics (e.g., years of  
11 46 expertise, gender). To reach simple size and variation in sample characteristics, key international  
12 47 organizations from the field (e.g., ESPACOMP, PCNE, ESCP, WONCA, EMA, EPF, EARTO, EuroDURG etc.)  
13 48 will be contacted to fill any missing gaps, if needed.  
14  
15  
16  
17  
18  
19  
20  
21  
22

49

## 50 Patient and Public Involvement

51 The goal of this Delphi consultation is to involve stakeholders (patient representatives among them)  
52 in decisions regarding the development of ENABLE repository and is part of the broader approach to  
53 Patient and Public Involvement followed in the ENABLE Action. Results will be communicated to all  
54 stakeholders and they will be listed and acknowledged among ENABLE collaborators.  
55

## 56 Data collection

57 We will use an online platform, eDelphi.org (Metodix Ltd, Helsinki, Finland<sup>75</sup>), for data collection. All  
58 survey activities - distribution, reminders, communication with and between the panellists and interim  
59 analysis of the process will be performed through the tool. The survey will be conducted in autumn  
60 and winter 2021 in three stages:

- 61 1. **Pilot stage** - at least 10 members of the COST ENABLE Action, specifically members of the WG2,  
62 will be asked to test the survey (including instructions for participants) and to provide feedback on  
63 face validity as well as user experience.
- 64 2. **First stage phase** – invitation of 20 purposefully selected stakeholders (aiming for variation in  
65 expertise, geographical location, and gender) to create initial aggregated feedback of the RT-  
66 Delphi.
- 67 3. **Full scale RT-Delphi** - all remaining stakeholders will be invited to participate in the study.

68

69 Stakeholders will receive an email invitation via the eDelphi platform with personalized link to the  
70 survey. Detailed instructions describing survey aims, rules of engagement and how to use the platform  
71 will be available on the platform.

72

73 At the beginning of the survey, participants will be encouraged to think of a hypothetical situation in  
74 which they would search for MATech applicable to their own setting/role and to assess the proposed  
75 attributes from this perspective throughout the survey. First, panellists will be asked to familiarize with  
76 the proposed structure and provide general feedback on the completeness. Further, they will be asked  
77 to rate **agreement** with and **clarity** of the MATech definition and **relevance and clarity** of each  
78 proposed attribute group on a 9-points Likert scale, where 1 represents extremely irrelevant/unclear  
79 and 9 represents extremely relevant/clear. We will use the Live 2D format<sup>75</sup>, where each outcome  
80 represents one of the two dimensions, i.e., the x axis stands for relevance and the y axis stands for  
81 clarity. Additionally, an open text field will be provided for panellists to comment on completeness of  
82 each attribute group, i.e., proposing additional attributes or revising definitions. We will moderate the  
83 discussion in the following ways: (i) address technical issues with the platform by responding to the  
84 comment when the issues will be solved or provide instructions how to manage the issue and (ii)  
85 outline the progress of the study and the most commented questions in bulletins send through the  
86 platform once a week. Delphi survey materials, including all attributes' labels and definitions as well  
87 as participant instructions, are shown in the *Supplementary Materials*.

88

89 For sample description purposes, participants will be requested to provide information on their  
90 expertise (profession, years of experience, relevant professional experiences) and demographic  
91 characteristics (age, gender, country of practice). These data will be presented in aggregated form and  
92 not linked to the individual's activity or answers. Re-visiting and re-rating will be encouraged by weekly  
93 reminders.

94

95 Data collection will be stopped upon reaching adequate sample size and characteristics to achieve  
96 sufficient representability and generalizability of the opinions gathered. Therefore, we propose  
97 stopping the Delphi, when 3 criteria will be met: (i) the total response rate to the survey is  $\geq 30\%$   
98 (number of participants completing the survey, of the total number of stakeholders invited)<sup>76</sup>; (ii) a  
99 minimum of 10 panellists in each stakeholder group completed the survey; (iii) a minimum of 1  
100 stakeholder from at least 2/3 of the COST ENABLE countries has completed the survey. We will  
101 operationalize survey completion as providing background data and answering at least 75% of the  
102 repository structure questions.

103

## 104 Data analysis

105 Descriptive statistics will be used to characterize the sample of panellists and each stakeholder  
106 subgroup regarding profession, years of experience, age, gender and country.

107 Several measures can be used to determine when consensus is reached, with the percentage of  
108 agreement being the most common.<sup>77</sup> Pre-specification of the consensus measure and criteria for  
109 consensus increases trustworthiness of findings.<sup>78</sup>

### 110 Level of agreement on relevance, clarity and completeness

111 Stakeholder agreement on the proposed definition and attributes will guide decisions on the  
112 repository structure. Therefore, we selected set of criteria representing different levels of agreement  
113 and consequently carrying different weights in these decisions. The level of agreement on every  
114 attribute for both outcomes (e.g., relevance and clarity) will be quantified using the Interpercentile  
115 Range Adjusted for Symmetry (IPRAS) analysis technique from the RAND/UCLA Appropriateness  
116 Method (RAM).<sup>79</sup> Firstly, the disagreement index (DI) will be calculated as a ratio between the  
117 Interpercentile Range (IPR) and IPRAS. A  $DI > 1$  (i.e.,  $IPR > IPRAS$ ) indicates disagreement exist. IPR is  
118 calculated using the 30th to 70th percentile. IPRAS for the 9-points Likert scale is calculated according  
119 to the formula presented in the RAM User Manual.<sup>79</sup>

120 Secondly, the median and DI will define different levels of agreement and steer the decisions about  
121 the repository structure. For the relevance:

- 122 i. items with the median of 7-9 and no disagreement will be considered as *relevant and mandatory*.
- 123 ii. items with the median of 4-6 or disagreement will be considered as *optional*.
- 124 iii. items with the median of 1-3 and no disagreement, will be considered *not relevant* and candidates  
125 for *exclusion*.

126 For an even number of participants, median ratings of e.g., 6.5 or 3.5 will be assigned to the higher  
127 level.<sup>79</sup> Stakeholders' responses per question will be summarized using descriptive statistics.

128 For clarity ratings, the above criteria will be applied as (i) sufficiently clear to remain unchanged; (ii)  
129 optional changes and (iii) candidates for rephrasing.

130 Panellist comments in the open text fields will be analysed qualitatively, using content analysis.  
131 Findings will be used to rephrase and improve clarity of certain attributes or to add additional  
132 attributes proposed by stakeholders.

### 133 Subgroup analysis

134 Following the primary analysis on the whole sample, a subgroup analysis per stakeholder group will be  
135 conducted to examine variation in opinions and potential differences among subgroups. The same  
136 agreement criteria will be applied and descriptive statistics will be stratified by stakeholder group. In

1  
2  
3 137 addition, we will determine the reliability of ratings per question within stakeholder group by  
4  
5 138 calculating the *intraclass correlation coefficient (ICC)*. The ICC calculation is based on the two-way  
6  
7 139 random model, considering type (average measures) and definition of relationship (consistency) and  
8  
9 140 is presented in Equation 1. ICC > 0.70 will indicate moderate to good reliability.<sup>80 81</sup>

10  
11 141 *Equation 1. Calculation of the intraclass correlation coefficient (ICC), expressed in %. MS<sub>R</sub> stands for*  
12  
13 142 *mean square for rows and MS<sub>E</sub> stands for mean square for error.*

$$14 143 \quad ICC = \frac{MS_R - MS_E}{MS_R} \times 100 \text{ [\%]}$$

15  
16  
17 144

### 18 19 20 145 **Analysis of process indicators**

21  
22 146 By analysing process data from the online tool, we will describe in more detail how stakeholders  
23  
24 147 responses evolved through iterations and how consensus or certain level of agreement has formed.<sup>25</sup>  
25  
26 148 <sup>82</sup>

27 149 **Stability of response** presents the consistency of responses within the study period and between  
28  
29 150 respondent group stability, which is considered a necessary precondition for determining the level of  
30  
31 151 agreement or if consensus was achieved.<sup>83-85</sup> Different measures of dispersion (e.g., median,  
32  
33 152 interquartile range) and statistical approaches (e.g. descriptive, inferential) can be used<sup>74 85</sup> to measure  
34  
35 153 stability, which can be calculated between rounds (traditional Delphi) or at the end of the study (RT-  
36  
37 154 Delphi).<sup>71 74</sup>

38  
39 155 We will use the *coefficient of quartile variation (CQV)* as descriptive measure of response stability. CQV  
40  
41 156 will be calculated over all participants (CQV<sub>total</sub>) and within the same stakeholder group (CQV<sub>sub</sub>) to  
42  
43 157 account for expected higher variation in response between different stakeholder groups. A CQV<sub>total</sub> <  
44  
45 158 30% and CQV<sub>sub</sub> < 15% will be considered as stable response. CQV calculation is shown in *Equation 2*.  
46  
47 159 <sup>84 86</sup>

48  
49 160 *Equation 2. Calculation of the coefficient of quartile variation (CQV), expressed in %. Q3 stands for value*  
50  
51 161 *of the 3<sup>rd</sup> quartile and Q1 for 1<sup>st</sup> quartile.*

$$52 162 \quad CQV = \frac{Q3 - Q1}{Q3 + Q1} \times 100 \text{ [\%]}$$

53  
54  
55 163

### 56 164 **Final repository structure**

57  
58 165 After conducting the analyses described above, results suggesting modifications to the proposed  
59  
60 166 structure will be considered for adoption by the Steering Committee in a subsequent version, which

1  
2  
3 167 will represent the final structure of the ENABLE repository implemented on the initial ENABLE  
4  
5 168 repository version. Further work will be considered to address results that might suggest ongoing  
6  
7 169 debates in the field about certain attribute groups or the need for more in-depth consultation and  
8  
9 170 evidence generation. This work will accompany the iterative improvement of the repository during the  
10  
11 171 ENABLE Action.

## 12 172 Ethics and dissemination

### 13 173 Ethical considerations and consent to publish

14  
15  
16 174 The study is designed to ensure participants' anonymity and to manage personal data in line with EU  
17  
18 175 regulation. Before starting the survey, every participant will provide an informed consent electronically  
19  
20 176 on the study entry page. Participants will be asked to carefully read through the statement regarding  
21  
22 177 the study aim and nature as well as the data handling procedures and to mark their understanding and  
23  
24 178 agreement. The results will only be published in an aggregated form and no personal details will be  
25  
26 179 revealed.

27 180 An ethical approval for the activities of the COST ENABLE Action, including this Delphi study, was  
28  
29 181 granted by the Malaga Regional Research Ethics Committee ("Comite de Etica de la Investigacion  
30  
31 182 Provincial de Malaga") on 29th April 2021. In addition, a data protection assessment was carried out  
32  
33 183 by the Data Protection Officer at the University of Basel. According to this instance the Delphi study  
34  
35 184 protocol was determined as compliant regarding data protection and security. Both approvals are  
36  
37 185 presented in the *Supplementary Materials*.

38 186

### 39 187 Dissemination

40  
41 188 The proposed scope and framework of attributes together with findings from this Delphi study will  
42  
43 189 represent the first steps on the pathway to create an evidence-based, interoperable and user-friendly  
44  
45 190 MATEch repository. Following the Delphi consultation and integration of the repository module on the  
46  
47 191 ENABLE website<sup>87</sup>, providers of MATEch (public or private) would be invited to upload information on  
48  
49 192 their products via a MATEch description form based on the final repository structure. The accuracy of  
50  
51 193 the information would be verified by an independent review panel through a procedure yet to be  
52  
53 194 established. The repository will be publicly accessible for interested parties. Moreover, the use of the  
54  
55 195 repository will be promoted and supported by dissemination meetings, workshops, and training  
56  
57 196 schools. The findings of the study will be presented via publications (reports and manuscripts in open  
58  
59 197 access peer-reviewed journals) and oral presentations to different stakeholders in conferences and  
60  
198 meetings. The spirit of COST Actions is networking and dissemination of ideas; hence the action is open  
199  
200 199 for anybody who would wish to join or would like to be informed about its activities.

## 200 Acknowledgement

201 The authors would like to thank the ENABLE members for their feedback on the development of the  
202 ENABLE repository and early versions of this work, and the ENABLE Core Team for leadership and  
203 coordination of ENABLE activities, of which this work is part of.

## 204 Contributorship statement

205 All authors contributed to the work and formation of this manuscript. The first draft was prepared by  
206 UNM, CG, JR and ALD. All other members of the steering committee (PBF, FH, MTH, CJ, FR, DS, and IT)  
207 reviewed and upgraded the first version. All steering committee members (CG, JR, PBF, FH, MTH, CJ,  
208 FR, DS, IT) worked on development of the scope and framework of the attribute groups, UNM and ALD  
209 coordinated the work. SPG was consulted as the expert in Delphi methodology, specifically the  
210 RAND/UCLA Appropriateness Method. The final version of the protocol was prepared by UNM and  
211 reviewed by all other authors (CG, JR, PBF, SPG, FH, MTH, CJ, FR, DS, IT, ALD). All authors have read  
212 and approve the final version of the manuscript.

## 213 Competing interests

214 SPG is a research team member for ExpertLens (an online platform and methodology for conducting  
215 modified-Delphi studies). SG's spouse is a salaried employee of, and owns stock in, Eli Lilly and  
216 Company.  
217 All other authors declare no conflict of interests.

## 218 Funding

219 This work was supported by COST Action ENABLE - European Network to Advance Best practices &  
220 technoLogY on medication adherence', number CA19132. Funders had no role in the study design,  
221 content work and preparation or writing of the manuscript.  
222 CG was supported by a PhD grant financed by the Action LIONS Vaincre le Cancer.  
223 The work of IT was partially supported by the Ministry of Education, Science and Technological  
224 Development of the Republic of Serbia (project No. 451-03-9/2021-14/200161).  
225 ALD was supported by an IDEXLYON grant (16-IDEX-0005; 2018-2021) during the preparation of this  
226 manuscript.

1  
2  
3 228 **Data sharing statement**  
4

5 229 Documents detailing the development of the present protocol and the data collection planned are  
6  
7 230 shared as supplementary materials. The data, analyses and results of this study will be shared in open  
8  
9 231 access according to the COST open access policy.

10  
11 232 **Supplementary materials**  
12

13 233 **Delphi survey materials:**  
14

- 15 234 1. Medication Adherence Technology tree in Excel (outlining the whole proposed structure with  
16  
17 235 corresponding labels and definitions).  
18  
19 236 2. Delphi information letter to participants  
20  
21 237 3. Instructions for Delphi participants  
22  
23 238 4. Summary of the Delphi survey  
23  
24 239 5. Ethical approval by Malaga Regional Research Ethics Committee  
25  
26 240 6. Data protection assessment by the Data Protection Officer at the University of Basel  
27  
28 241 7. General data protection statement  
29  
30  
31  
32  
33  
34  
35  
36  
37  
38  
39  
40  
41  
42  
43  
44  
45  
46  
47  
48  
49  
50  
51  
52  
53  
54  
55  
56  
57  
58  
59  
60



## 243 References

- 244 1. Vrijens B, De Geest S, Hughes DA, et al. A new taxonomy for describing and defining adherence to  
245 medications. *Br J Clin Pharmacol* 2012;73(5):691-705. doi: 10.1111/j.1365-2125.2012.04167.x  
246 [published Online First: 2012/04/11]
- 247 2. Sabate E. Adherence to long-term therapies: evidence for action. Geneva: World Health  
248 Organization., 2003.
- 249 3. Osterberg L, Blaschke T. Adherence to medication. *N Engl J Med* 2005;353(5):487-97. doi:  
250 10.1056/NEJMra050100 [published Online First: 2005/08/05]
- 251 4. Ruddy K, Mayer E, Partridge A. Patient adherence and persistence with oral anticancer treatment.  
252 *CA: A Cancer Journal for Clinicians* 2009;59(1):56-66. doi: <https://doi.org/10.3322/caac.20004>
- 253 5. MEDI-VOICE Project. A Low Cost, Environmentally Friendly, Smart Packaging Technology to  
254 Differentiate European SME Suppliers to Service the Needs of the Blind, Illiterate and Europe's Aging  
255 Population.: MEDI-VOICE (Project No. FP6-017893), 2008.
- 256 6. Ahmed I, Ahmad NS, Ali S, et al. Medication Adherence Apps: Review and Content Analysis. *JMIR*  
257 *Mhealth Uhealth* 2018;6(3):e62. doi: 10.2196/mhealth.6432 [published Online First: 2018/03/20]
- 258 7. Clyne W, McLachlan S. A mixed-methods study of the implementation of medication adherence  
259 policy solutions: how do European countries compare? *Patient Prefer Adherence* 2015;9:1505-15. doi:  
260 10.2147/ppa.S85408 [published Online First: 2015/11/26]
- 261 8. van Boven JF, Tsiligianni I, Potočnjak I, et al. European Network to Advance Best Practices and  
262 Technology on Medication Adherence: Mission Statement. *Front Pharmacol* 2021;12(2620) doi:  
263 10.3389/fphar.2021.748702
- 264 9. Costello RW DA, Ryan D, Mclvor RA, Boycott K, Chisholm A, Price D, Blakey JD. Effective deployment  
265 of technology-supported management of chronic respiratory conditions: a call for stakeholder  
266 engagement. . *Pragmat Obs Res* 2017;8:119-28. doi: <https://doi.org/10.2147/POR.S132316>
- 267 10. NHS Apps Library, National Health Service, United Kingdom [Available from:  
268 <https://www.nhs.uk/apps-library/> accessed 01-07-2021 2021.
- 269 11. My Health Apps: Patient View; 2021 [Available from: <https://myhealthapps.net/> accessed 01-07-  
270 2021.
- 271 12. InterventieNet; Nederland [Available from: <https://interventienet.nl/> accessed 01-07-2021.
- 272 13. GGD AppStore: GGD GHOR Nederland; [Available from:  
273 <https://www.ggdappstore.nl/Appstore/Homepage/Sessie,Medewerker,Button> accessed 01-07-2021.
- 274 14. DIGA: Federal Institute for Drugs and Medical Devices, Germany[Available from:  
275 <https://diga.bfarm.de/de> accessed 01-07-2021.



- 1  
2  
3 276 15. Weisse Liste, Germany [Available from: <https://www.trustedhealthapps.org/de> accessed 01-07-  
4 277 2021.  
5  
6 278 16. Bansal A, Iqbal Khan, J., Kaiser Alam, S. Introduction to Computational Health Informatics. 1st ed:  
7 279 Chapman and Hall/CRC 2020.  
8  
9 280 17. Liyanage H, Krause P, de Lusignan S. Using ontologies to improve semantic interoperability in health  
10 281 data. *BMJ Health & Care Informatics* 2015;22(2):309-15. doi: 10.14236/jhi.v22i2.159  
11  
12 282 18. WHO. International Statistical Classification of Diseases and Related Health Problems (ICD-11):  
13 283 World Health Organization (WHO), 2021.  
14  
15 284 19. Human Behaviour Change Project. The Behaviour Change Intervention Ontology. Ontology Lookup  
16 285 Service (OLS), 2021.  
17  
18 286 20. Malone Jea, ed. A new Ontology Lookup Service at EMBL-EBI. Proceedings of SWAT4LS  
19 287 International Conference; 2015 01-07-2021.  
20  
21 288 21. WHO. Classification of digital health interventions v1.0 (DHI): World Health Organisation (WHO),  
22 289 2018.  
23  
24 290 22. Norris E, Hastings J, Marques MM, et al. Why and how to engage expert stakeholders in ontology  
25 291 development: insights from social and behavioural sciences. *J Biomed Semantics* 2021;12(1):4. doi:  
26 292 10.1186/s13326-021-00240-6 [published Online First: 2021/03/25]  
27  
28 293 23. Geist MR. Using the Delphi method to engage stakeholders: A comparison of two studies.  
29 294 *Evaluation and Program Planning* 2010;33(2):147-54. doi:  
30 295 <https://doi.org/10.1016/j.evalprogplan.2009.06.006>  
31  
32 296 24. Wright A, Norris E, Finnerty AN, Marques MM, Johnston M, Kelly MP, Hastings J, West R, Michie  
33 297 S. Ontologies relevant to behaviour change interventions: a method for their development [version 3;  
34 298 peer review: 2 approved, 1 approved with reservations]. *Wellcome Open Res* 2020;5(126) doi:  
35 299 <https://doi.org/10.12688/wellcomeopenres.15908.3>  
36  
37 300 25. Khodyakov D, Savitsky TD, Dalal S. Collaborative learning framework for online stakeholder  
38 301 engagement. *Health Expectations* 2016;19(4):868-82. doi: <https://doi.org/10.1111/hex.12383>  
39  
40 302 26. Health Technologies. 60th World Health Assembly; 2007; Geneva, Switzerland. WHO.  
41  
42 303 27. Perleth M, Jakubowski E, Busse R. What is 'best practice' in health care? State of the art and  
43 304 perspectives in improving the effectiveness and efficiency of the European health care systems. *Health*  
44 305 *Policy* 2001;56(3):235-50. doi: 10.1016/s0168-8510(00)00138-x [published Online First: 2001/06/12]  
45  
46 306 28. Michie S, Wood CE, Johnston M, et al. Behaviour change techniques: the development and  
47 307 evaluation of a taxonomic method for reporting and describing behaviour change interventions (a suite  
48 308 of five studies involving consensus methods, randomised controlled trials and analysis of qualitative  
49 309 data). *Health Technol Assess* 2015;19(99):1-188. doi: 10.3310/hta19990 [published Online First:  
50 310 2015/12/01]

- 1  
2  
3 311 29. Damschroder LJ, Aron DC, Keith RE, et al. Fostering implementation of health services research  
4 312 findings into practice: a consolidated framework for advancing implementation science. *Implement Sci*  
5 313 2009;4:50. doi: 10.1186/1748-5908-4-50 [published Online First: 2009/08/12]  
6  
7 314 30. Glasgow RE, Harden SM, Gaglio B, et al. RE-AIM Planning and Evaluation Framework: Adapting to  
8 315 New Science and Practice With a 20-Year Review. *Front Public Health* 2019;7:64-64. doi:  
9 316 10.3389/fpubh.2019.00064  
10  
11 317 31. WHO. International Classification of Health Interventions (ICHI): World Health Organization (WHO),  
12 318 2021.  
13  
14 319 32. SNOMED International. SNOMED Clinical Terminology: SNOMED International; [Available from:  
15 320 <https://www.snomed.org/snomed-ct/why-snomed-ct> accessed 01-07-2021.  
16  
17 321 33. Goetzinger C et al. Ehealth technologies to improve medication adherence in patients with chronic  
18 322 diseases: a systematic review. PROSPERO - International prospective register of systematic reviews,  
19 323 2019.  
20  
21 324 34. Ribaut J et al. Development of an evaluation tool to assess and evaluate the characteristics and  
22 325 quality of eHealth applications: a systematic review and consensus finding: PROSPERO - International  
23 326 prospective register of systematic reviews, 2021.  
24  
25 327 35. Donabedian A. Evaluating the quality of medical care. 1966. *Milbank Q* 2005;83(4):691-729. doi:  
26 328 10.1111/j.1468-0009.2005.00397.x [published Online First: 2005/11/11]  
27  
28 329 36. Moreno-Conde A, Parra-Calderón CL, Sánchez-Seda S, et al. ITEMAS ontology for healthcare  
29 330 technology innovation. *Health Research Policy and Systems* 2019;17(1):47. doi: 10.1186/s12961-019-  
30 331 0453-y  
31  
32 332 37. WHO. International Classification of Functioning, Disability and Health (ICF): World Health  
33 333 Organisation (WHO), 2001.  
34  
35 334 38. UKCRC Health Research Analysis Forum UK Health Research Classification System (UKHRCS) -  
36 335 Health Categories; United Kingdom, 2021 [Available from: <https://hrcsonline.net/health-categories/>  
37 336 accessed 01-07-2021.  
38  
39 337 39. National Cancer Institute Thesaurus (NCIT), Cancer Biomedical Informatics Grid, Unified Medical  
40 338 Language System, 2021.  
41  
42 339 40. MeSH. Medical Subject Headings (MeSH): US National Library of Medicine (NIH), 2021.  
43  
44 340 41. Nieuwlaat R, Wilczynski N, Navarro T, et al. Interventions for enhancing medication adherence.  
45 341 *Cochrane Database of Systematic Reviews* 2014(11) doi: 10.1002/14651858.CD000011.pub4  
46  
47 342 42. Guerreiro MP, Strawbridge J, Cavaco AM, et al. Development of a European competency  
48 343 framework for health and other professionals to support behaviour change in persons self-managing  
49 344 chronic disease. *BMC Med Educ* 2021;21(1):287. doi: 10.1186/s12909-021-02720-w  
50  
51  
52  
53  
54  
55  
56  
57  
58  
59  
60

- 1  
2  
3 345 43. Cross AJ, Elliott RA, Petrie K, et al. Interventions for improving medication-taking ability and  
4 346 adherence in older adults prescribed multiple medications. *Cochrane Database of Systematic Reviews*  
5 347 2020(5) doi: 10.1002/14651858.CD012419.pub2  
6  
7  
8 348 44. Levy H, Janke AT, Langa KM. Health Literacy and the Digital Divide Among Older Americans. *J Gen*  
9 349 *Intern Med* 2015;30(3):284-89. doi: 10.1007/s11606-014-3069-5  
10  
11 350 45. Carey R, Jenkins, E., Williams, P., Evans, F., Horan, M., Johnston, M., West, R., Michie, S. A taxonomy  
12 351 of modes of delivery of behaviour change  
13 352 interventions: . European Health Psychology Society Conference. Padova, Italy: European Health  
14 353 Psychology Society (EHPS), 2017.  
15  
16 354 46. Kardas P, Lewek P, Matyjaszczyk M. Determinants of patient adherence: a review of systematic  
17 355 reviews. *Front Pharmacol* 2013;4:91. doi: 10.3389/fphar.2013.00091 [published Online First:  
18 356 2013/07/31]  
19  
20 357 47. Michie S, van Stralen MM, West R. The behaviour change wheel: A new method for characterising  
21 358 and designing behaviour change interventions. *Implementation Science* 2011;6(1):42. doi:  
22 359 10.1186/1748-5908-6-42  
23  
24 360 48. Cane J, O'Connor D, Michie S. Validation of the theoretical domains framework for use in behaviour  
25 361 change and implementation research. *Implementation Science* 2012;7(1):37. doi: 10.1186/1748-5908-  
26 362 7-37  
27  
28 363 49. Carey RN, Connell LE, Johnston M, et al. Behavior Change Techniques and Their Mechanisms of  
29 364 Action: A Synthesis of Links Described in Published Intervention Literature. *Ann Behav Med*  
30 365 2018;53(8):693-707. doi: 10.1093/abm/kay078  
31  
32 366 50. Schenk PM, Michie, S., West, R., Hastings, J., Lorencatto, F., Moore, C., Hayes, E., Wright, A.  
33 367 Mechanism of Action Ontology v1 OSF, 2021.  
34  
35 368 51. Michie S, Richardson M, Johnston M, et al. The behavior change technique taxonomy (v1) of 93  
36 369 hierarchically clustered techniques: building an international consensus for the reporting of behavior  
37 370 change interventions. *Ann Behav Med* 2013;46(1):81-95. doi: 10.1007/s12160-013-9486-6 [published  
38 371 Online First: 2013/03/21]  
39  
40 372 52. Pearson E, Byrne-Davis L, Bull E, et al. Behavior change techniques in health professional training:  
41 373 developing a coding tool. *Transl Behav Med* 2018;10(1):96-102. doi: 10.1093/tbm/iby125  
42  
43 374 53. Byrne-Davis L, Bull, E., Hart, J. Cards for Change: Manchester Implementation Science Collaboration  
44 375 (MCRIMPSCI), 2019.  
45  
46 376 54. Conn VS, Ruppap TM, Enriquez M, et al. Healthcare provider targeted interventions to improve  
47 377 medication adherence: systematic review and meta-analysis. *International Journal of Clinical Practice*  
48 378 2015;69(8):889-99. doi: <https://doi.org/10.1111/ijcp.12632>  
49  
50  
51  
52  
53  
54  
55  
56  
57  
58  
59  
60

- 1  
2  
3 379 55. Norris E, Wright, A., et al. Development of an Intervention Source Ontology: Specifying who delivers  
4 380 behaviour change interventions.  
5  
6 381 56. Kronk CA, Dexheimer JW. Development of the Gender, Sex, and Sexual Orientation ontology:  
7 382 Evaluation and workflow. *Journal of the American Medical Informatics Association* 2020;27(7):1110-  
8 383 15. doi: 10.1093/jamia/ocaa061  
9  
10  
11 384 57. Norris E, Marques et al. Development of a Setting Ontology for behaviour change interventions:  
12 385 Specifying where interventions take place, 2021.  
13  
14 386 58. Campbell SM, Braspenning J, Hutchinson A, et al. Research methods used in developing and  
15 387 applying quality indicators in primary care. *Qual Saf Health Care* 2002;11(4):358-64. doi:  
16 388 10.1136/qhc.11.4.358 [published Online First: 2002/12/07]  
17  
18 389 59. Stoyanov SR, Hides L, Kavanagh DJ, et al. Mobile app rating scale: a new tool for assessing the  
19 390 quality of health mobile apps. *JMIR Mhealth Uhealth* 2015;3(1):e27. doi: 10.2196/mhealth.3422  
20 391 [published Online First: 2015/03/12]  
21  
22 392 60. Eysenbach G. et al. CONSORT-EHEALTH: improving and standardizing evaluation reports of Web-  
23 393 based and mobile health interventions. *J Med Internet Res* 2011;13(4):e126. doi: 10.2196/jmir.1923  
24 394 [published Online First: 2012/01/03]  
25  
26 395 61. European Network for Health Technology Assessment (EUnetHTA Joint). EUnetHTA Joint Action 2  
27 396 WP. HTA Core Model<sup>®</sup> version 3.0 (Pdf), 2016.  
28  
29 397 62. O'Rourke B, Oortwijn W, Schuller T. The new definition of health technology assessment: A  
30 398 milestone in international collaboration. *Int J Technol Assess Health Care* 2020;36(3):187-90. doi:  
31 399 10.1017/S0266462320000215 [published Online First: 2020/05/13]  
32  
33 400 63. Zullig LL, Deschodt M, Liska J, et al. Moving from the Trial to the Real World: Improving Medication  
34 401 Adherence Using Insights of Implementation Science. *Annu Rev Pharmacol Toxicol* 2019;59(1):423-45.  
35 402 doi: 10.1146/annurev-pharmtox-010818-021348  
36  
37 403 64. Proctor E, Silmere H, Raghavan R, et al. Outcomes for implementation research: conceptual  
38 404 distinctions, measurement challenges, and research agenda. *Adm Policy Ment Health* 2011;38(2):65-  
39 405 76. doi: 10.1007/s10488-010-0319-7 [published Online First: 2010/10/20]  
40  
41 406 65. Powell BJ, Waltz TJ, Chinman MJ, et al. A refined compilation of implementation strategies: results  
42 407 from the Expert Recommendations for Implementing Change (ERIC) project. *Implementation Science*  
43 408 2015;10(1):21. doi: 10.1186/s13012-015-0209-1  
44  
45 409 66. Iqbal S, Pison-Young, L. . The Delphi method: a step by step guide. *The Psychologist* 2009;22(7):598-  
46 410 601.  
47  
48 411 67. Okoli C, Pawlowski SD. The Delphi method as a research tool: an example, design considerations  
49 412 and applications. *Information & Management* 2004;42(1):15-29. doi: 10.1016/j.im.2003.11.002  
50  
51  
52  
53  
54  
55  
56  
57  
58  
59  
60

- 1  
2  
3 413 68. Rowe G WG, Bolger F. Delphi: A Reevaluation of Research and Theory. *Technological Forecasting*  
4 414 *and Social Change* 1991;39:235-51.
- 5  
6 415 69. Gordon T, Pease A. RT Delphi: An efficient, "round-less" almost real time Delphi method.  
7 416 *Technological Forecasting and Social Change* 2006;73(4):321-33. doi:  
8 417 <https://doi.org/10.1016/j.techfore.2005.09.005>
- 9  
10 418 70. Aengenheyster S, Cuhls, K., Gerhold, L., Heiskanen-Schüttler, M., Huck, J., Muszynska, M. Real-Time  
11 419 Delphi in practice — A comparative analysis of existing software-based tools. *Technological*  
12 420 *Forecasting and Social Change* 2017;118:15-27. doi: <https://doi.org/10.1016/j.techfore.2017.01.023>
- 13  
14 421 71. Gnatzy T, Warth J, von der Gracht H, et al. Validating an innovative real-time Delphi approach - A  
15 422 methodological comparison between real-time and conventional Delphi studies. *Technological*  
16 423 *Forecasting and Social Change* 2011;78(9):1681-94. doi:  
17 424 <https://doi.org/10.1016/j.techfore.2011.04.006>
- 18  
19 425 72. Quirke FA, Healy P, Bhraonáin EN, et al. Multi-Round compared to Real-Time Delphi for consensus  
20 426 in core outcome set (COS) development: a randomised trial. *Trials* 2021;22(1):142. doi:  
21 427 [10.1186/s13063-021-05074-2](https://doi.org/10.1186/s13063-021-05074-2)
- 22  
23 428 73. Thiebes S, Scheidt D, Schmidt-Kraepelin M, et al. Paving the Way for Real-Time Delphi in  
24 429 Information Systems Research: A Synthesis of Survey Instrument Designs and Feedback  
25 430 Mechanisms2018.
- 26  
27 431 74. Varndell W, Fry M, Elliott D. Applying real-time Delphi methods: development of a pain  
28 432 management survey in emergency nursing. *BMC Nursing* 2021;20(1):149. doi: [10.1186/s12912-021-](https://doi.org/10.1186/s12912-021-00661-9)  
29 433 [00661-9](https://doi.org/10.1186/s12912-021-00661-9)
- 30  
31 434 75. eDelphi.org - Delphi Method Software [program]: Metodix Ltd, Helsinki, Finland, 2021.
- 32  
33 435 76. Edwards PJ, Roberts I, Clarke MJ, et al. Methods to increase response to postal and electronic  
34 436 questionnaires. *Cochrane Database Syst Rev* 2009(3):Mr000008. doi:  
35 437 [10.1002/14651858.MR000008.pub4](https://doi.org/10.1002/14651858.MR000008.pub4) [published Online First: 2009/07/10]
- 36  
37 438 77. Diamond IR, Grant RC, Feldman BM, et al. Defining consensus: A systematic review recommends  
38 439 methodologic criteria for reporting of Delphi studies. *J Clin Epidemiol* 2014;67(4):401-09. doi:  
39 440 [10.1016/j.jclinepi.2013.12.002](https://doi.org/10.1016/j.jclinepi.2013.12.002)
- 40  
41 441 78. Grant S, Booth M, Khodyakov D. Lack of preregistered analysis plans allows unacceptable data  
42 442 mining for and selective reporting of consensus in Delphi studies. *J Clin Epidemiol* 2018;99:96-105. doi:  
43 443 <https://doi.org/10.1016/j.jclinepi.2018.03.007>
- 44  
45 444 79. Fitch K, Bernstein SJ, Aguilar MD, et al. The RAND/UCLA Appropriateness Method User's Manual:  
46 445 RAND Corporation 2001.
- 47  
48  
49  
50  
51  
52  
53  
54  
55  
56  
57  
58  
59  
60

- 1  
2  
3 446 80. Koo TK, Li MY. A Guideline of Selecting and Reporting Intraclass Correlation Coefficients for  
4 Reliability Research. *J Chiropr Med* 2016;15(2):155-63. doi: 10.1016/j.jcm.2016.02.012 [published  
5 447 Online First: 2016/06/23]  
6 448  
7  
8 449 81. McGraw K, Wong S. Forming inferences about some intraclass correlation coefficients. *Psychol*  
9 450 *Methods* 1996;1:30-46.  
10  
11 451 82. Khodyakov D, Chen C. Nature and Predictors of Response Changes in Modified-Delphi Panels. *Value*  
12 452 *in Health* 2020;23(12):1630-38. doi: <https://doi.org/10.1016/j.jval.2020.08.2093>  
13  
14 453 83. Dajani JS SM, Talley WK. Stability and agreement criteria for the termination of Delphi studies.  
15 454 *Technol Forecast Soc Chang* 1979;13:83-90.  
16  
17 455 84. Scheibe M SM, Schofer J. Experiments in Delphi methodology. In: Linstone HA TM, ed. *The Delphi*  
18 456 *Method — Techniques and Applications*: Addison-Wesley, Reading, 1975:262-87.  
19  
20 457 85. von der Gracht HA. Consensus measurement in Delphi studies: Review and implications for future  
21 458 quality assurance. *Technological Forecasting and Social Change* 2012;79(8):1525-36. doi:  
22 459 <https://doi.org/10.1016/j.techfore.2012.04.013>  
23  
24 460 86. Trevelyan EG, Robinson PN. Delphi methodology in health research: how to do it? *European Journal*  
25 461 *of Integrative Medicine* 2015;7(4):423-28. doi: <https://doi.org/10.1016/j.eujim.2015.07.002>  
26  
27 462 87. COST Action ENABLE 2020-2023 [Available from: <https://enableadherence.eu/> accessed  
28 463 25.11.2021].  
29  
30  
31  
32  
33  
34  
35  
36  
37  
38  
39  
40  
41  
42  
43  
44  
45  
46  
47  
48  
49  
50  
51  
52  
53  
54  
55  
56  
57  
58  
59  
60

1  
2  
3  
4  
5  
6  
7  
8  
9  
10  
11  
12  
13  
14  
15  
16  
17  
18  
19  
20  
21  
22  
23  
24  
25  
26  
27  
28  
29  
30  
31  
32  
33  
34  
35  
36  
37  
38  
39  
40  
41  
42  
43  
44  
45  
46  
47  
48  
49  
50  
51  
52  
53  
54  
55  
56  
57  
58  
59  
60

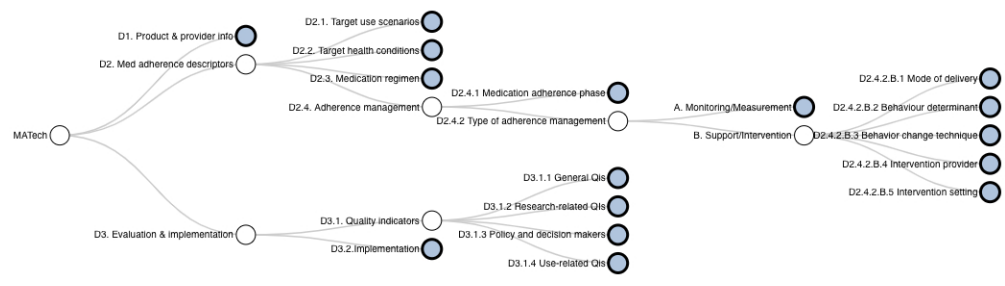

Figure 1. The interactive graph showing framework of attributes for MATEch (“the MATEch Tree”).

945x263mm (28 x 28 DPI)

1  
2  
3  
4  
5  
6  
7  
8  
9  
10  
11  
12  
13  
14  
15  
16  
17  
18  
19  
20  
21  
22  
23  
24  
25  
26  
27  
28  
29  
30  
31  
32  
33  
34  
35  
36  
37  
38  
39  
40  
41  
42  
43  
44  
45  
46  
47  
48  
49  
50  
51  
52  
53  
54  
55  
56  
57  
58  
59  
60



1  
2  
3  
4  
5  
6  
7  
8  
9  
10  
11  
12  
13  
14  
15  
16  
17  
18  
19  
20  
21  
22  
23  
24  
25  
26  
27  
28  
29  
30  
31  
32  
33  
34  
35  
36  
37  
38  
39  
40  
41  
42  
43  
44  
45  
46  
47  
48  
49  
50  
51  
52  
53  
54  
55  
56  
57  
58  
59  
60

## Presentation of the ENABLE repository framework of attributes

This document presents the framework of attributes developed for the ENABLE repository by the WG2 task force. ENABLE is a COST action aiming to enhance collaboration between stakeholders across Europe for adoption of best practice and technologies supporting medication adherence. To this end, ENABLE develops an online repository of medication adherence technologies. This repository will showcase a diverse range of technologies and describe them in detail so that repository users can search and select technologies that are most appropriate to their contexts and needs. Thus, the repository would need to include information relevant for this specific use.

Information about technologies can be coded/represented via a collection of various attributes. This coding is driven by a user perspective where a user (HCP, regulator, client/patient, researcher) will be willing to learn more about (or select) a technology based on their specific interests or needs, and therefore is looking for specific types of information where attributes of technologies correspond to attributes of the solutions envisaged by users. Attributes may apply to adherence-related goals, target user characteristics, health conditions, product characteristics, etc., each represented as distinct attribute groups. Such modular ("LEGO") approach allows describing a very diverse landscape of existing and future technologies.

The repository is supposed to include all potential attributes for all technologies so that they allow the descriptions of any medication adherence technology in detailed way to enable informed decision-making. The goal of the present work therefore is to create a framework of such attributes, each with their own unique labels (short names of attributes) and definitions (longer explanations of what the attributes refer to).

Once the repository is created using this framework of attributes, we will be able to describe and group available adherence technologies. If a new attribute is subsequently identified, it will be added to the list -as part of an existing attribute or by creating a new one- aiming to ensure the evolution of this repository with changes in the field, as well as backward compatibility.

1  
2  
3  
4  
5  
6  
7  
8  
9  
10  
11  
12  
13  
14  
15  
16  
17  
18  
19  
20  
21  
22  
23  
24  
25  
26  
27  
28  
29  
30  
31  
32  
33  
34  
35  
36  
37  
38  
39  
40  
41  
42  
43  
44  
45  
46  
47  
48  
49  
50  
51  
52  
53  
54  
55  
56  
57  
58  
59  
60

**Product & provider information** D1.1

**Medication adherence descriptors** D2.1 target use scenarios

D2.2 target health conditions

D2.3 medication regimen

D2.4 medication adherence management components

D2.4.2.A Monitoring/measurement methods and tar

D2.4.2.B.1 intervention modes of delivery

D2.4.2.B.2 target behaviour determinants

D2.4.2.B.3 behaviour change techniques

D2.4.2.B.4 intervention providers

D2.4.2.B.5 intervention settings

**Evaluation & implementation** D3.1 quality indicators

D3.2 implementation indicators

Each entry in the ENABLE repository will refer to a unique product, which will be identified with a unique ID, provided by a unique organisation (manufacturer, developer) with its own unique ID and related metadata (e.g., date of entry, verification process, etc.) to present the identity of the described MATech and its provider.

The type of common adherence management activities that the technology is intended to be used for.

The type of diseases or health problems the technology is intended for.

The prescribed schematic form/therapeutic plan of medication therapy that the technology is intended for.

The type of procedures and time periods the technology facilitates to achieve the best use by patients of appropriately prescribed medicines.

What measurement methods are used and what is being measured (measurement targets).

The modes used to deliver the medication adherence intervention

Causal influences on medication adherence that can be modifiable (amenable to intervention with a medication adherence technology).

Options/activities included in the technology that aim to influence barriers and facilitators of medication adherence

Role played by a person who uses the technology to assist the patients in their self-management of medication adherence

The social and physical environment in which the technology is used to manage adherence to medication

Quality indicators are standardized, evidence-based, and measurable items for monitoring and evaluating the quality of healthcare performance.

Outcomes and strategies that help implement medication adherence measurement / intervention within its target setting

What product does the entry refer to, who provides it, who entered its description in the repository and when?

What use scenarios and types of users is the technology intended for?

Which health conditions could the technology be used for as part of adherence support?

What type of medication regimen(s) (treatment intention, route of administration, number of medications, and recommended dosing) is the technology intended for?

What adherence management types and phases does the technology target?

If measurement is a component, what measurement methods does the technology use and what do they measure?

If intervention is a component, how is it delivered to its users?

If intervention is a component, what reasons for non-adherence can the technology help address?

If intervention is a component, what are the 'active ingredients' present in the technology that may trigger change in the reasons for non-adherence targeted?

If intervention is a component, who delivers the intervention to users?

If intervention is a component, where is the service for improving adherence delivered?

How does the technology meet key quality indicators from different perspectives?

What implementation outcomes and strategies are needed and available for adopting this technology in the intended setting?

1  
2  
3  
4  
5  
6  
7  
8  
9  
10  
11  
12  
13  
14  
15  
16  
17  
18  
19  
20  
21  
22  
23  
24  
25  
26  
27  
28  
29  
30  
31  
32  
33  
34  
35  
36  
37  
38  
39  
40  
41  
42  
43  
44  
45  
46

| Upper Level           | Sub-Level 1                 | Sub-level 2                               |
|-----------------------|-----------------------------|-------------------------------------------|
| Product               |                             |                                           |
|                       | Product ID                  |                                           |
|                       | Product Name                |                                           |
|                       | Brief product description   |                                           |
|                       | Date of release             |                                           |
|                       | Date of most recent update  |                                           |
|                       | Product type                |                                           |
|                       |                             | Hardware                                  |
|                       |                             | Software                                  |
|                       |                             | Service                                   |
|                       |                             | Material                                  |
|                       | Product Brand               |                                           |
|                       | Product integration         |                                           |
|                       |                             | stand-alone component                     |
|                       | Language(s)                 |                                           |
|                       | Country(ies)                |                                           |
|                       | Terms & Conditions of use   |                                           |
|                       | Cost                        |                                           |
| Provider Organisation |                             |                                           |
|                       | Provider ID                 |                                           |
|                       | Provider Name               |                                           |
|                       | Provider type               |                                           |
|                       |                             | Privately-owned / for profit organisation |
|                       |                             | Public / state-owned organisation         |
|                       |                             | Not-for-profit organisation               |
|                       | Provider domain of activity |                                           |



























































| Definition                                                                                                                                             |
|--------------------------------------------------------------------------------------------------------------------------------------------------------|
| health technology (device, procedure or system) that could be used to manage adherence to medication                                                   |
| random alphanumeric code given to the product at first entry in the database                                                                           |
| name given by the technology provider to designate the product itself                                                                                  |
| text (max 500 characters including spaces) that provides a short summary of the main functionality and attributes of the technology                    |
| date when the technology first became available                                                                                                        |
| date when the technology had the most recent update                                                                                                    |
| type of support on which (components of) the product (are) is implemented                                                                              |
| product (component) consisting of physical components of electronic systems                                                                            |
| product (component) consisting of programs or other operating information for electronic systems                                                       |
| product (component) consisting of actions to support someone manage adherence to medication                                                            |
| product (component) consisting of physical substances or equipment other than electronic                                                               |
| name used by the technology provider to designate the group to which the product belongs                                                               |
| manner in which the product is intended to be integrated in an adherence support process                                                               |
| product integration in which the technology is intended to function unrelated to other products                                                        |
| product integration in which the technology is intended to link to other products as component of a wider system                                       |
| languages in which the technology is available for use                                                                                                 |
| name of country/countries where technology is in available                                                                                             |
| written rules which two or more parties engage to respect and meet to apply the technology in a setting; may include intellectual property, copyright. |
| amount paid, charged, or engaged to be paid, for purchasing the technology                                                                             |
| organisation that produces and/or makes the product available for users                                                                                |
| random alphanumeric code given at first entry of a product from a provider in the database                                                             |
| name of the provider organisation                                                                                                                      |
| administrative form in which the organisation is registered                                                                                            |
| organisation that operates to generate financial profit                                                                                                |
| organisation that is owned by a government                                                                                                             |
| organisation not intended to make a profit but to provide or support a service that people need                                                        |
| general field in which the organisation is active                                                                                                      |





























































1  
2  
3  
4  
5  
6  
7  
8  
9  
10  
11  
12  
13  
14  
15  
16  
17  
18  
19  
20  
21  
22  
23  
24  
25  
26  
27  
28  
29  
30  
31  
32  
33  
34  
35  
36  
37  
38  
39  
40  
41  
42  
43  
44  
45  
46

**DEVELOPMENT AND JUSTIFICATION**

A repository entry represents any contribution from an author describing a medication adherence technology using the ENABLE template, which they then upload on the platform. Each entry in the ENABLE repository will be stored individually. It will have a unique entry ID, and metadata such as the date of entry, date of most recent modification, and whether the information was verified by another manner (validation process to be developed). It will refer to a unique product, which will be identified with a unique ID, provided by a unique organisation (manufacturer, developer) with its own unique ID. Multiple entries can refer to the same product ID (the reconciliation of entries for the same product will be part of the validation procedures, i.e. by recency or merging of the entries), and an organisation may provide multiple products.

No ontology, taxonomy or classification could be identified in the BioPortal repository or in the literature that provides a formal description of product characteristics used for medication adherence technologies in particular. However, a related ontology was identified that refers to medical technology innovation in healthcare centers. This ontology, developed by members of the Platform for Innovation in Medical and Health Technologies (ITEMAS; a network of healthcare centers aiming to foster innovation in the Spanish healthcare system), includes relevant concepts on the development and adoption of technologies in healthcare and therefore it is an appropriate source of descriptors for the ENABLE repository. The ITEMAS concepts were consulted and concepts referring to products themselves and their providers were selected, since ENABLE aims to describe the technologies and not cover as well the process of developing and integrating them in healthcare systems. This choice of concepts makes the repository interoperable with organisations that would adopt ITEMAS for their activities. Additional constructs were generated after discussion with SC members.

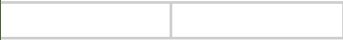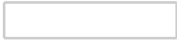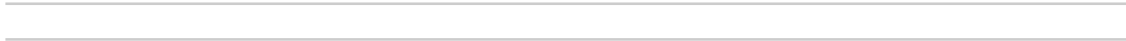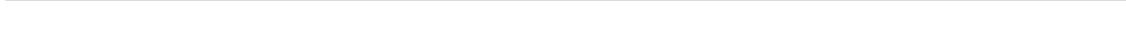

1  
2  
3  
4  
5  
6  
7  
8  
9  
10  
11  
12  
13  
14  
15  
16  
17  
18  
19  
20  
21  
22  
23  
24  
25  
26  
27  
28  
29  
30  
31  
32  
33  
34  
35  
36  
37  
38  
39  
40  
41  
42  
43  
44  
45  
46

---

---

---

---

For peer review only

1  
2  
3  
4  
5  
6  
7  
8  
9  
10  
11  
12  
13  
14  
15  
16  
17  
18  
19  
20  
21  
22  
23  
24  
25  
26  
27  
28  
29  
30  
31  
32  
33  
34  
35  
36  
37  
38  
39  
40  
41  
42  
43  
44  
45  
46

For peer review only

1  
2  
3  
4  
5  
6  
7  
8  
9  
10  
11  
12  
13  
14  
15  
16  
17  
18  
19  
20  
21  
22  
23  
24  
25  
26  
27  
28  
29  
30  
31  
32  
33  
34  
35  
36  
37  
38  
39  
40  
41  
42  
43  
44  
45  
46

For peer review only

1  
2  
3  
4  
5  
6  
7  
8  
9  
10  
11  
12  
13  
14  
15  
16  
17  
18  
19  
20  
21  
22  
23  
24  
25  
26  
27  
28  
29  
30  
31  
32  
33  
34  
35  
36  
37  
38  
39  
40  
41  
42  
43  
44  
45  
46

For peer review only

1  
2  
3  
4  
5  
6  
7  
8  
9  
10  
11  
12  
13  
14  
15  
16  
17  
18  
19  
20  
21  
22  
23  
24  
25  
26  
27  
28  
29  
30  
31  
32  
33  
34  
35  
36  
37  
38  
39  
40  
41  
42  
43  
44  
45  
46

For peer review only



1  
2  
3  
4  
5  
6  
7  
8  
9  
10  
11  
12  
13  
14  
15  
16  
17  
18  
19  
20  
21  
22  
23  
24  
25  
26  
27  
28  
29  
30  
31  
32  
33  
34  
35  
36  
37  
38  
39  
40  
41  
42  
43  
44  
45  
46

For peer review only

1  
2  
3  
4  
5  
6  
7  
8  
9  
10  
11  
12  
13  
14  
15  
16  
17  
18  
19  
20  
21  
22  
23  
24  
25  
26  
27  
28  
29  
30  
31  
32  
33  
34  
35  
36  
37  
38  
39  
40  
41  
42  
43  
44  
45  
46

For peer review only

1  
2  
3  
4  
5  
6  
7  
8  
9  
10  
11  
12  
13  
14  
15  
16  
17  
18  
19  
20  
21  
22  
23  
24  
25  
26  
27  
28  
29  
30  
31  
32  
33  
34  
35  
36  
37  
38  
39  
40  
41  
42  
43  
44  
45  
46

For peer review only

1  
2  
3  
4  
5  
6  
7  
8  
9  
10  
11  
12  
13  
14  
15  
16  
17  
18  
19  
20  
21  
22  
23  
24  
25  
26  
27  
28  
29  
30  
31  
32  
33  
34  
35  
36  
37  
38  
39  
40  
41  
42  
43  
44  
45  
46

For peer review only

1  
2  
3  
4  
5  
6  
7  
8  
9  
10  
11  
12  
13  
14  
15  
16  
17  
18  
19  
20  
21  
22  
23  
24  
25  
26  
27  
28  
29  
30  
31  
32  
33  
34  
35  
36  
37  
38  
39  
40  
41  
42  
43  
44  
45  
46

For peer review only

1  
2  
3  
4  
5  
6  
7  
8  
9  
10  
11  
12  
13  
14  
15  
16  
17  
18  
19  
20  
21  
22  
23  
24  
25  
26  
27  
28  
29  
30  
31  
32  
33  
34  
35  
36  
37  
38  
39  
40  
41  
42  
43  
44  
45  
46

For peer review only

1  
2  
3  
4  
5  
6  
7  
8  
9  
10  
11  
12  
13  
14  
15  
16  
17  
18  
19  
20  
21  
22  
23  
24  
25  
26  
27  
28  
29  
30  
31  
32  
33  
34  
35  
36  
37  
38  
39  
40  
41  
42  
43  
44  
45  
46

For peer review only

1  
2  
3  
4  
5  
6  
7  
8  
9  
10  
11  
12  
13  
14  
15  
16  
17  
18  
19  
20  
21  
22  
23  
24  
25  
26  
27  
28  
29  
30  
31  
32  
33  
34  
35  
36  
37  
38  
39  
40  
41  
42  
43  
44  
45  
46

For peer review only



1  
2  
3  
4  
5  
6  
7  
8  
9  
10  
11  
12  
13  
14  
15  
16  
17  
18  
19  
20  
21  
22  
23  
24  
25  
26  
27  
28  
29  
30  
31  
32  
33  
34  
35  
36  
37  
38  
39  
40  
41  
42  
43  
44  
45  
46

For peer review only

1  
2  
3  
4  
5  
6  
7  
8  
9  
10  
11  
12  
13  
14  
15  
16  
17  
18  
19  
20  
21  
22  
23  
24  
25  
26  
27  
28  
29  
30  
31  
32  
33  
34  
35  
36  
37  
38  
39  
40  
41  
42  
43  
44  
45  
46

For peer review only

1  
2  
3  
4  
5  
6  
7  
8  
9  
10  
11  
12  
13  
14  
15  
16  
17  
18  
19  
20  
21  
22  
23  
24  
25  
26  
27  
28  
29  
30  
31  
32  
33  
34  
35  
36  
37  
38  
39  
40  
41  
42  
43  
44  
45  
46

For peer review only

1  
2  
3  
4  
5  
6  
7  
8  
9  
10  
11  
12  
13  
14  
15  
16  
17  
18  
19  
20  
21  
22  
23  
24  
25  
26  
27  
28  
29  
30  
31  
32  
33  
34  
35  
36  
37  
38  
39  
40  
41  
42  
43  
44  
45  
46

For peer review only

1  
2  
3  
4  
5  
6  
7  
8  
9  
10  
11  
12  
13  
14  
15  
16  
17  
18  
19  
20  
21  
22  
23  
24  
25  
26  
27  
28  
29  
30  
31  
32  
33  
34  
35  
36  
37  
38  
39  
40  
41  
42  
43  
44  
45  
46

For peer review only

1  
2  
3  
4  
5  
6  
7  
8  
9  
10  
11  
12  
13  
14  
15  
16  
17  
18  
19  
20  
21  
22  
23  
24  
25  
26  
27  
28  
29  
30  
31  
32  
33  
34  
35  
36  
37  
38  
39  
40  
41  
42  
43  
44  
45  
46

For peer review only

1  
2  
3  
4  
5  
6  
7  
8  
9  
10  
11  
12  
13  
14  
15  
16  
17  
18  
19  
20  
21  
22  
23  
24  
25  
26  
27  
28  
29  
30  
31  
32  
33  
34  
35  
36  
37  
38  
39  
40  
41  
42  
43  
44  
45  
46

For peer review only

1  
2  
3  
4  
5  
6  
7  
8  
9  
10  
11  
12  
13  
14  
15  
16  
17  
18  
19  
20  
21  
22  
23  
24  
25  
26  
27  
28  
29  
30  
31  
32  
33  
34  
35  
36  
37  
38  
39  
40  
41  
42  
43  
44  
45  
46

For peer review only



1  
2  
3  
4  
5  
6  
7  
8  
9  
10  
11  
12  
13  
14  
15  
16  
17  
18  
19  
20  
21  
22  
23  
24  
25  
26  
27  
28  
29  
30  
31  
32  
33  
34  
35  
36  
37  
38  
39  
40  
41  
42  
43  
44  
45  
46

For peer review only

1  
2  
3  
4  
5  
6  
7  
8  
9  
10  
11  
12  
13  
14  
15  
16  
17  
18  
19  
20  
21  
22  
23  
24  
25  
26  
27  
28  
29  
30  
31  
32  
33  
34  
35  
36  
37  
38  
39  
40  
41  
42  
43  
44  
45  
46

For peer review only

1  
2  
3  
4  
5  
6  
7  
8  
9  
10  
11  
12  
13  
14  
15  
16  
17  
18  
19  
20  
21  
22  
23  
24  
25  
26  
27  
28  
29  
30  
31  
32  
33  
34  
35  
36  
37  
38  
39  
40  
41  
42  
43  
44  
45  
46

For peer review only

1  
2  
3  
4  
5  
6  
7  
8  
9  
10  
11  
12  
13  
14  
15  
16  
17  
18  
19  
20  
21  
22  
23  
24  
25  
26  
27  
28  
29  
30  
31  
32  
33  
34  
35  
36  
37  
38  
39  
40  
41  
42  
43  
44  
45  
46

For peer review only

1  
2  
3  
4  
5  
6  
7  
8  
9  
10  
11  
12  
13  
14  
15  
16  
17  
18  
19  
20  
21  
22  
23  
24  
25  
26  
27  
28  
29  
30  
31  
32  
33  
34  
35  
36  
37  
38  
39  
40  
41  
42  
43  
44  
45  
46

For peer review only

1  
2  
3  
4  
5  
6  
7  
8  
9  
10  
11  
12  
13  
14  
15  
16  
17  
18  
19  
20  
21  
22  
23  
24  
25  
26  
27  
28  
29  
30  
31  
32  
33  
34  
35  
36  
37  
38  
39  
40  
41  
42  
43  
44  
45  
46

For peer review only

|  |  |  |  |  |  |  |  |  |  |  |
|--|--|--|--|--|--|--|--|--|--|--|
|  |  |  |  |  |  |  |  |  |  |  |
|--|--|--|--|--|--|--|--|--|--|--|

1  
2  
3  
4  
5  
6  
7  
8  
9  
10  
11  
12  
13  
14  
15  
16  
17  
18  
19  
20  
21  
22  
23  
24  
25  
26  
27  
28  
29  
30  
31  
32  
33  
34  
35  
36  
37  
38  
39  
40  
41  
42  
43  
44  
45  
46

For peer review only

1  
2  
3  
4  
5  
6  
7  
8  
9  
10  
11  
12  
13  
14  
15  
16  
17  
18  
19  
20  
21  
22  
23  
24  
25  
26  
27  
28  
29  
30  
31  
32  
33  
34  
35  
36  
37  
38  
39  
40  
41  
42  
43  
44  
45  
46

For peer review only



1  
2  
3  
4  
5  
6  
7  
8  
9  
10  
11  
12  
13  
14  
15  
16  
17  
18  
19  
20  
21  
22  
23  
24  
25  
26  
27  
28  
29  
30  
31  
32  
33  
34  
35  
36  
37  
38  
39  
40  
41  
42  
43  
44  
45  
46

For peer review only

1  
2  
3  
4  
5  
6  
7  
8  
9  
10  
11  
12  
13  
14  
15  
16  
17  
18  
19  
20  
21  
22  
23  
24  
25  
26  
27  
28  
29  
30  
31  
32  
33  
34  
35  
36  
37  
38  
39  
40  
41  
42  
43  
44  
45  
46

For peer review only

1  
2  
3  
4  
5  
6  
7  
8  
9  
10  
11  
12  
13  
14  
15  
16  
17  
18  
19  
20  
21  
22  
23  
24  
25  
26  
27  
28  
29  
30  
31  
32  
33  
34  
35  
36  
37  
38  
39  
40  
41  
42  
43  
44  
45  
46

For peer review only

1  
2  
3  
4  
5  
6  
7  
8  
9  
10  
11  
12  
13  
14  
15  
16  
17  
18  
19  
20  
21  
22  
23  
24  
25  
26  
27  
28  
29  
30  
31  
32  
33  
34  
35  
36  
37  
38  
39  
40  
41  
42  
43  
44  
45  
46

For peer review only

1  
2  
3  
4  
5  
6  
7  
8  
9  
10  
11  
12  
13  
14  
15  
16  
17  
18  
19  
20  
21  
22  
23  
24  
25  
26  
27  
28  
29  
30  
31  
32  
33  
34  
35  
36  
37  
38  
39  
40  
41  
42  
43  
44  
45  
46

For peer review only

1  
2  
3  
4  
5  
6  
7  
8  
9  
10  
11  
12  
13  
14  
15  
16  
17  
18  
19  
20  
21  
22  
23  
24  
25  
26  
27  
28  
29  
30  
31  
32  
33  
34  
35  
36  
37  
38  
39  
40  
41  
42  
43  
44  
45  
46

For peer review only

1  
2  
3  
4  
5  
6  
7  
8  
9  
10  
11  
12  
13  
14  
15  
16  
17  
18  
19  
20  
21  
22  
23  
24  
25  
26  
27  
28  
29  
30  
31  
32  
33  
34  
35  
36  
37  
38  
39  
40  
41  
42  
43  
44  
45  
46

For peer review only

1  
2  
3  
4  
5  
6  
7  
8  
9  
10  
11  
12  
13  
14  
15  
16  
17  
18  
19  
20  
21  
22  
23  
24  
25  
26  
27  
28  
29  
30  
31  
32  
33  
34  
35  
36  
37  
38  
39  
40  
41  
42  
43  
44  
45  
46

For peer review only



1  
2  
3  
4  
5  
6  
7  
8  
9  
10  
11  
12  
13  
14  
15  
16  
17  
18  
19  
20  
21  
22  
23  
24  
25  
26  
27  
28  
29  
30  
31  
32  
33  
34  
35  
36  
37  
38  
39  
40  
41  
42  
43  
44  
45  
46

For peer review only

1  
2  
3  
4  
5  
6  
7  
8  
9  
10  
11  
12  
13  
14  
15  
16  
17  
18  
19  
20  
21  
22  
23  
24  
25  
26  
27  
28  
29  
30  
31  
32  
33  
34  
35  
36  
37  
38  
39  
40  
41  
42  
43  
44  
45  
46

For peer review only

1  
2  
3  
4  
5  
6  
7  
8  
9  
10  
11  
12  
13  
14  
15  
16  
17  
18  
19  
20  
21  
22  
23  
24  
25  
26  
27  
28  
29  
30  
31  
32  
33  
34  
35  
36  
37  
38  
39  
40  
41  
42  
43  
44  
45  
46

For peer review only

1  
2  
3  
4  
5  
6  
7  
8  
9  
10  
11  
12  
13  
14  
15  
16  
17  
18  
19  
20  
21  
22  
23  
24  
25  
26  
27  
28  
29  
30  
31  
32  
33  
34  
35  
36  
37  
38  
39  
40  
41  
42  
43  
44  
45  
46

For peer review only

1  
2  
3  
4  
5  
6  
7  
8  
9  
10  
11  
12  
13  
14  
15  
16  
17  
18  
19  
20  
21  
22  
23  
24  
25  
26  
27  
28  
29  
30  
31  
32  
33  
34  
35  
36  
37  
38  
39  
40  
41  
42  
43  
44  
45  
46

For peer review only

1  
2  
3  
4  
5  
6  
7  
8  
9  
10  
11  
12  
13  
14  
15  
16  
17  
18  
19  
20  
21  
22  
23  
24  
25  
26  
27  
28  
29  
30  
31  
32  
33  
34  
35  
36  
37  
38  
39  
40  
41  
42  
43  
44  
45  
46

For peer review only

1  
2  
3  
4  
5  
6  
7  
8  
9  
10  
11  
12  
13  
14  
15  
16  
17  
18  
19  
20  
21  
22  
23  
24  
25  
26  
27  
28  
29  
30  
31  
32  
33  
34  
35  
36  
37  
38  
39  
40  
41  
42  
43  
44  
45  
46

For peer review only

1  
2  
3  
4  
5  
6  
7  
8  
9  
10  
11  
12  
13  
14  
15  
16  
17  
18  
19  
20  
21  
22  
23  
24  
25  
26  
27  
28  
29  
30  
31  
32  
33  
34  
35  
36  
37  
38  
39  
40  
41  
42  
43  
44  
45  
46

For peer review only



1  
2  
3  
4  
5  
6  
7  
8  
9  
10  
11  
12  
13  
14  
15  
16  
17  
18  
19  
20  
21  
22  
23  
24  
25  
26  
27  
28  
29  
30  
31  
32  
33  
34  
35  
36  
37  
38  
39  
40  
41  
42  
43  
44  
45  
46

For peer review only

1  
2  
3  
4  
5  
6  
7  
8  
9  
10  
11  
12  
13  
14  
15  
16  
17  
18  
19  
20  
21  
22  
23  
24  
25  
26  
27  
28  
29  
30  
31  
32  
33  
34  
35  
36  
37  
38  
39  
40  
41  
42  
43  
44  
45  
46

For peer review only

1  
2  
3  
4  
5  
6  
7  
8  
9  
10  
11  
12  
13  
14  
15  
16  
17  
18  
19  
20  
21  
22  
23  
24  
25  
26  
27  
28  
29  
30  
31  
32  
33  
34  
35  
36  
37  
38  
39  
40  
41  
42  
43  
44  
45  
46

For peer review only

1  
2  
3  
4  
5  
6  
7  
8  
9  
10  
11  
12  
13  
14  
15  
16  
17  
18  
19  
20  
21  
22  
23  
24  
25  
26  
27  
28  
29  
30  
31  
32  
33  
34  
35  
36  
37  
38  
39  
40  
41  
42  
43  
44  
45  
46

For peer review only

1  
2  
3  
4  
5  
6  
7  
8  
9  
10  
11  
12  
13  
14  
15  
16  
17  
18  
19  
20  
21  
22  
23  
24  
25  
26  
27  
28  
29  
30  
31  
32  
33  
34  
35  
36  
37  
38  
39  
40  
41  
42  
43  
44  
45  
46

For peer review only

1  
2  
3  
4  
5  
6  
7  
8  
9  
10  
11  
12  
13  
14  
15  
16  
17  
18  
19  
20  
21  
22  
23  
24  
25  
26  
27  
28  
29  
30  
31  
32  
33  
34  
35  
36  
37  
38  
39  
40  
41  
42  
43  
44  
45  
46

For peer review only

1  
2  
3  
4  
5  
6  
7  
8  
9  
10  
11  
12  
13  
14  
15  
16  
17  
18  
19  
20  
21  
22  
23  
24  
25  
26  
27  
28  
29  
30  
31  
32  
33  
34  
35  
36  
37  
38  
39  
40  
41  
42  
43  
44  
45  
46

For peer review only

1  
2  
3  
4  
5  
6  
7  
8  
9  
10  
11  
12  
13  
14  
15  
16  
17  
18  
19  
20  
21  
22  
23  
24  
25  
26  
27  
28  
29  
30  
31  
32  
33  
34  
35  
36  
37  
38  
39  
40  
41  
42  
43  
44  
45  
46

For peer review only



1  
2  
3  
4  
5  
6  
7  
8  
9  
10  
11  
12  
13  
14  
15  
16  
17  
18  
19  
20  
21  
22  
23  
24  
25  
26  
27  
28  
29  
30  
31  
32  
33  
34  
35  
36  
37  
38  
39  
40  
41  
42  
43  
44  
45  
46

For peer review only

|  |  |  |  |  |  |
|--|--|--|--|--|--|
|  |  |  |  |  |  |
|--|--|--|--|--|--|

| upper level                   | Sub-level 1                                                                                                                                                                  | Sub-level 2                                                                                                                                                                                                       | Sub-level 3                                                                                                                                         |
|-------------------------------|------------------------------------------------------------------------------------------------------------------------------------------------------------------------------|-------------------------------------------------------------------------------------------------------------------------------------------------------------------------------------------------------------------|-----------------------------------------------------------------------------------------------------------------------------------------------------|
| adherence self-management use | Person in the healthcare environment<br><br>Patient age group<br><br>Patient functional status<br><br>Patient literacy<br><br>Patient polypharmacy<br>Patient multimorbidity | Patient<br>Caregiver<br><br>Adult<br><br>Adolescent<br>Child<br>Infant<br><br>Mental functions<br><br>Sensory functions<br><br>Neuromusculoskeletal and movement-related functions<br><br>Patient health literacy | Older adult<br><br>Memory functions<br><br>Perceptual functions<br><br>Seeing functions<br><br>Hearing functions<br><br>Patient medication literacy |
| adherence support service use |                                                                                                                                                                              |                                                                                                                                                                                                                   |                                                                                                                                                     |

For peer review only

1  
2  
3  
4  
5  
6  
7  
8  
9  
10  
11  
12  
13  
14  
15  
16  
17  
18  
19  
20  
21  
22  
23  
24  
25  
26  
27  
28  
29  
30  
31  
32  
33  
34  
35  
36  
37  
38  
39  
40  
41  
42  
43  
44  
45  
46

Professional health and social  
care providers  
Health (system) manager

For peer review only

**Definition**

Scenario in which the technology is used for adherence self-management activities

Person who interacts with the technology within the process of self-management

Person who uses the technology for self-management of their own adherence

Person who uses the technology to assist the patient in their self-management of adherence

Age group of the person for which the medical technology is appropriate for use

Person aged over 18 years

Adult aged over 66 years

Person aged between 12 and 18 years

Person aged between 1 and 12 years

Person aged less than 1 year

The level of functioning of the person for which the technology is appropriate

Patient status regarding functions of the brain involved in adherence self-management

Functions regarding registering, storing, retrieving information for adherence self-management and/or using technology for this purpose

Functions regarding recognizing and interpreting sensory stimuli necessary for adherence self-management and/or using technology for this purpose

Functions regarding recognizing and interpreting visual stimuli (light, form, shape, size, color)

Functions regarding recognizing and interpreting auditive stimuli (presence, location, pitch, loudness and quality of sounds)

Functions regarding movement and mobility (of joints, bones, reflexes and muscles)

The patient's ability to read and write needed to manage adherence

The patient's capacity to obtain, process and understand basic health information and services needed to self-manage adherence

The patient's ability to understand and act on medication-related information

The use of multiple drugs (5+) administered to the same patient

complex interactions of several (2+) co-existing diseases occurring in the same patient

Scenario in which the technology is used for activities supporting taking medication in an health/social care provision setting

1  
2  
3  
4  
5  
6  
7  
8  
9  
10  
11  
12  
13  
14  
15  
16  
17  
18  
19  
20  
21  
22  
23  
24  
25  
26  
27  
28  
29  
30  
31  
32  
33  
34  
35  
36  
37  
38  
39  
40  
41  
42  
43  
44  
45  
46

Members of the health and social care workforce who deliver adherence support services

Persons involved in the administration and oversight of public health systems delivering adherence support services

For peer review only

### DEVELOPMENT AND JUSTIFICATION

Among the various use scenarios for medication adherence management, we can distinguish two general categories in what concerns the potential types of users and their characteristics that might influence the choice of technology: self-management use, and adherence support use. In the first scenario, it is either the patient or the caregiver who might be interested in searching the repository for technologies the patient can use themselves, or the couple patient-caregiver can use in the shared management of medication intake, for example at home. In the second scenario, a healthcare (or social care) provider may be interested in technologies they can use themselves to facilitate adherence support. A technology can apply to both use scenarios, for example when a monitoring technology is used by both patients/caregivers and the professionals who accompany them in their treatment and information can be transmitted from one to another (each having their own interface). Thus, the set of descriptors regarding target users operates this basic distinction.

The use of medication adherence technologies may be influenced by several characteristics of the patients, such as their age group, functional status regarding mental functions (e.g. memory and perception), sensory functions (e.g. vision and hearing), and movement-related functions, as well as characteristics of their health condition or treatment (e.g. multimorbidity and polypharmacy). Literacy and health literacy (and specifically medication literacy) are also central to the appropriateness and effectiveness of self-management support. Thus, descriptors related to these characteristics were identified in available ontologies (e.g. SNOMED-CT, WHO International Classification of Function) and included in the list of descriptors.

According to the WHO client classification (regarding Digital Health Interventions; DHI), there are two categories of potential clients of digital health technologies in addition to patients and caregivers: healthcare providers and health system managers. These were included as sub-categories of the adherence support use scenario, since both types of professionals (including here social care organisations and providers) can initiate a search for technologies to integrate in their practice. No characteristics of these types of users/clients were considered relevant for the choice of the tool in this initial version of the list. The provider of an adherence support intervention and the setting in which this can be performed are the focus of separate descriptor sets, since they can be different from the user who initiates the search (who can perform this for an entire team, including the patient and their caregiver).

| Upper level                    | Definition                                                                                                                                                                                                 |
|--------------------------------|------------------------------------------------------------------------------------------------------------------------------------------------------------------------------------------------------------|
| Blood                          | Health condition category that refers to haematological diseases, anaemia, clotting (including thromboses and venous embolisms)                                                                            |
| Cancer and neoplasms           | Health condition category that refers to all types of neoplasms, including benign, potentially malignant, or malignant (cancer) cancer growths (including leukaemia and mesothelioma).                     |
| Cardiovascular                 | Health condition category that refers to coronary heart disease, diseases of the vasculature and circulation including the lymphatic system                                                                |
| Congenital disorder            | Health condition category that refers to physical abnormalities and syndromes that are not associated with a single type of disease or condition, including Down's syndrome and cystic fibrosis            |
| Ear                            | Health condition category that refers to diseases of the ear, such as deafness                                                                                                                             |
| Eye                            | Health condition category that refers to diseases of the eye                                                                                                                                               |
| Infection                      | Health condition category that refers to diseases caused by pathogens, acquired immune deficiency syndrome, sexually transmitted infections                                                                |
| Inflammatory and immune system | Health condition category that refers to rheumatoid arthritis, connective tissue diseases, autoimmune diseases, allergies. (includes transplants)                                                          |
| Injuries and accidents         | Fractures, poisoning and burns.                                                                                                                                                                            |
| Mental health                  | Health condition category that refers to depression, schizophrenia, psychosis and personality disorders, addiction, suicide, anxiety, eating disorders, learning disabilities, autistic spectrum disorders |
| Metabolic and endocrine        | Health condition category that refers to metabolic disorders (including diabetes, and diseases of the pineal, thyroid, parathyroid, pituitary and adrenal glands).                                         |
| Musculoskeletal                | Health condition category that refers to osteoporosis, osteoarthritis, muscular and skeletal disorders                                                                                                     |

|    |                                    |                                                                              |
|----|------------------------------------|------------------------------------------------------------------------------|
| 1  |                                    |                                                                              |
| 2  | Neurological                       | Health condition category that refers to dementias, transmissible            |
| 3  |                                    | spongiform encephalopathies, Parkinson's disease, neurodegenerative          |
| 4  |                                    | diseases, Alzheimer's disease, epilepsy, multiple sclerosis                  |
| 5  |                                    |                                                                              |
| 6  | Oral and gastrointestinal          | Health condition category that refers to inflammatory bowel disease,         |
| 7  |                                    | Crohn's disease, diseases of the mouth, teeth, oesophagus, digestive         |
| 8  |                                    | system including liver and colon                                             |
| 9  | Renal and urogenital               | Health condition category that refers to kidney disease, pelvic              |
| 10 |                                    | inflammatory disease, renal and genital disorders                            |
| 11 | Reproductive health and childbirth | Health condition category that refers to fertility, contraception, abortion, |
| 12 |                                    | in vitro fertilisation, pregnancy, mammary gland development,                |
| 13 |                                    | menstruation and menopause, breast feeding, antenatal care, childbirth       |
| 14 |                                    | and complications of newborns                                                |
| 15 |                                    |                                                                              |
| 16 | Respiratory                        | Health condition category that refers to asthma, chronic obstructive         |
| 17 |                                    | pulmonary disease, and other respiratory diseases                            |
| 18 | Skin                               | Health condition category that refers to dermatological conditions           |
| 19 | Stroke                             | Health condition category that refers to ischaemic stroke (caused by         |
| 20 |                                    | blood clots) and haemorrhagic stroke (caused by cerebral/intercranial        |
| 21 |                                    | haemorrhage).                                                                |
| 22 |                                    |                                                                              |
| 23 | Generic health relevance           | Health condition category that refers to technologies applicable to all      |
| 24 |                                    | diseases and conditions                                                      |
| 25 |                                    |                                                                              |
| 26 |                                    |                                                                              |
| 27 |                                    |                                                                              |
| 28 |                                    |                                                                              |
| 29 |                                    |                                                                              |
| 30 |                                    |                                                                              |
| 31 |                                    |                                                                              |
| 32 |                                    |                                                                              |
| 33 |                                    |                                                                              |
| 34 |                                    |                                                                              |
| 35 |                                    |                                                                              |
| 36 |                                    |                                                                              |
| 37 |                                    |                                                                              |
| 38 |                                    |                                                                              |
| 39 |                                    |                                                                              |
| 40 |                                    |                                                                              |
| 41 |                                    |                                                                              |
| 42 |                                    |                                                                              |
| 43 |                                    |                                                                              |
| 44 |                                    |                                                                              |
| 45 |                                    |                                                                              |
| 46 |                                    |                                                                              |



**DEVELOPMENT AND JUSTIFICATION**

Depending on the health conditions for which medication is prescribed, adherence behaviours may be influenced by different factors and therefore require condition-specific interventions. Adherence technologies are therefore usually developed and validated to be used in one or several clinical domains and potential users may search for technologies applicable to the health condition(s) they aim to manage.

The International Classification of Disease (ICD-11) is a global standard for diagnostic purposes, and groups diseases in over 17000 categories ([icd.who.int](http://icd.who.int)). In ICD-11, 21 groups of codes (chapters) are proposed to describe health conditions, among other groups of codes for related diagnostic purposes. While ICD-11 is an elaborate classification used for clinical documentation and monitoring globally, a simpler classification has been developed by the UK Clinical Research Collaboration for research purposes: the Health Research Classification System (HRCS) (<https://hrcsonline.net/health-categories>). The HRCS is inspired by ICD and includes 21 separate disease categories, 19 of which are disease specific whereas the other 2 have a broader focus (e.g. general health and epidemiology, conditions of unknown aetiology). Of the 20 HRCS categories, 18 correspond broadly to ICD-11 chapters (merging 3 chapters into one category for reproductive health and childbirth, and omitting sleep-wake disorders), while the 19th refers to stroke as a distinct group of conditions. For the purpose of the present repository, we have therefore selected HRCS as 1) it is likely that research on adherence technologies will increasingly use these codes to record the type of health conditions studies are performed on and thus would map easier on these categories, and 2) the labels and descriptions used are relatively less technical and therefore easier to understand by stakeholders with diverse backgrounds. We considered that the last category ('Disputed aetiology and other') is less relevant for medication adherence and thus we excluded it from our descriptors list. The HRCS classification system, based on the ICD classification, would allow repository users to quickly and efficiently identify the type of health condition of their interest.

| Upper level             | Sub-level 1                     | Definition                                                                                                                                                                                                                  |
|-------------------------|---------------------------------|-----------------------------------------------------------------------------------------------------------------------------------------------------------------------------------------------------------------------------|
| type of intention       | preventive                      | The purpose for which the medication is prescribed.<br>Medication are prescribed as prevention/prophylaxis against the occurrence of diseases or disease-related adverse events (e.g. exacerbations, organ rejections etc.) |
|                         | therapeutic                     | Medication is prescribed as treatment of a disease and its associated symptoms.                                                                                                                                             |
|                         | duration of treatment           | The duration of treatment presents the intended interval of treatment and relates to the clinical course and disease conditions.                                                                                            |
|                         | short-term                      | treatment is prescribed over a limited time-period, mostly to treat an acute disease of sudden-onset and predictable end.                                                                                                   |
|                         | long-term                       | treatment is prescribed as a prolonged and persistently indicated therapy as it is the case in chronic, latent-progressive disease conditions.                                                                              |
| route of administration | oral                            | path by which medication is brought into contact with the body to unfold pharmacological effects.<br>Medications are administered as oral forms (tablets etc.) for drug reception via the mouth or gastro-intestinal tract. |
|                         | inhaled                         | Medications are administered as inhalation of aerosols, powders or gas via the respiratory tract.                                                                                                                           |
|                         | injections/subcutaneous         | Medications are administered as injection in subcutaneous layer for a relative slow drug release.                                                                                                                           |
|                         | infusion/parenteral             | Medications are administered as parenteral infusion for direct intra-venous application.                                                                                                                                    |
|                         | patches                         | Medications are administered as a dermal layer (e.g. patch) to achieve systemic drug-concentration and -efficacy.                                                                                                           |
|                         | topical                         | Medications are administered as topical forms for local effects on dermal or mucous surfaces/layers.                                                                                                                        |
|                         | number of monitored medications | how many distinct medications are monitored by the technology, if applicable                                                                                                                                                |
|                         | single medication               | Only treatment of a single medication is monitored.                                                                                                                                                                         |
|                         | multiple medication             | A combination therapy of two or more medications is monitored.                                                                                                                                                              |

1  
2  
3  
4  
5  
6  
7  
8  
9  
10  
11  
12  
13  
14  
15  
16  
17  
18  
19  
20  
21  
22  
23  
24  
25  
26  
27  
28  
29  
30  
31  
32  
33  
34  
35  
36  
37  
38  
39  
40  
41  
42  
43  
44  
45  
46

|                             |                                             |                                                                                                                                                    |
|-----------------------------|---------------------------------------------|----------------------------------------------------------------------------------------------------------------------------------------------------|
| prescribed dosing frequency |                                             | dose-taking patterns recommended for medicines administration, in which doses should be taken at defined time intervals over a defined time period |
|                             | once-daily dosing                           | Only one dose is prescribed at a certain time during the day.                                                                                      |
|                             | multiple daily dosing at fixed intervals    | Multiple doses are prescribed in a certain interval during the day.                                                                                |
|                             | once per week dosing                        | Only one dose is prescribed at a certain day during the week.                                                                                      |
|                             | multiple dosing per week in fixed intervals | Multiple doses are prescribed in a certain interval during the week.                                                                               |
|                             | dose adjustment recommendations             | The frequency or amount of a certain dose is adjusted to the newly prescribed treatment regimen.                                                   |
|                             |                                             |                                                                                                                                                    |
|                             |                                             |                                                                                                                                                    |
|                             |                                             |                                                                                                                                                    |
|                             |                                             |                                                                                                                                                    |
|                             |                                             |                                                                                                                                                    |
|                             |                                             |                                                                                                                                                    |
|                             |                                             |                                                                                                                                                    |
|                             |                                             |                                                                                                                                                    |
|                             |                                             |                                                                                                                                                    |
|                             |                                             |                                                                                                                                                    |
|                             |                                             |                                                                                                                                                    |
|                             |                                             |                                                                                                                                                    |
|                             |                                             |                                                                                                                                                    |
|                             |                                             |                                                                                                                                                    |
|                             |                                             |                                                                                                                                                    |
|                             |                                             |                                                                                                                                                    |
|                             |                                             |                                                                                                                                                    |
|                             |                                             |                                                                                                                                                    |
|                             |                                             |                                                                                                                                                    |
|                             |                                             |                                                                                                                                                    |
|                             |                                             |                                                                                                                                                    |
|                             |                                             |                                                                                                                                                    |
|                             |                                             |                                                                                                                                                    |
|                             |                                             |                                                                                                                                                    |
|                             |                                             |                                                                                                                                                    |
|                             |                                             |                                                                                                                                                    |
|                             |                                             |                                                                                                                                                    |
|                             |                                             |                                                                                                                                                    |





















|    |  |
|----|--|
| 1  |  |
| 2  |  |
| 3  |  |
| 4  |  |
| 5  |  |
| 6  |  |
| 7  |  |
| 8  |  |
| 9  |  |
| 10 |  |
| 11 |  |
| 12 |  |
| 13 |  |
| 14 |  |
| 15 |  |
| 16 |  |
| 17 |  |
| 18 |  |
| 19 |  |
| 20 |  |
| 21 |  |
| 22 |  |
| 23 |  |
| 24 |  |
| 25 |  |
| 26 |  |
| 27 |  |
| 28 |  |
| 29 |  |
| 30 |  |
| 31 |  |
| 32 |  |
| 33 |  |
| 34 |  |
| 35 |  |
| 36 |  |
| 37 |  |
| 38 |  |
| 39 |  |
| 40 |  |
| 41 |  |
| 42 |  |
| 43 |  |
| 44 |  |
| 45 |  |
| 46 |  |

For peer review only



|    |  |
|----|--|
| 1  |  |
| 2  |  |
| 3  |  |
| 4  |  |
| 5  |  |
| 6  |  |
| 7  |  |
| 8  |  |
| 9  |  |
| 10 |  |
| 11 |  |
| 12 |  |
| 13 |  |
| 14 |  |
| 15 |  |
| 16 |  |
| 17 |  |
| 18 |  |
| 19 |  |
| 20 |  |
| 21 |  |
| 22 |  |
| 23 |  |
| 24 |  |
| 25 |  |
| 26 |  |
| 27 |  |
| 28 |  |
| 29 |  |
| 30 |  |
| 31 |  |
| 32 |  |
| 33 |  |
| 34 |  |
| 35 |  |
| 36 |  |
| 37 |  |
| 38 |  |
| 39 |  |
| 40 |  |
| 41 |  |
| 42 |  |
| 43 |  |
| 44 |  |
| 45 |  |
| 46 |  |

For peer review only









|    |  |
|----|--|
| 1  |  |
| 2  |  |
| 3  |  |
| 4  |  |
| 5  |  |
| 6  |  |
| 7  |  |
| 8  |  |
| 9  |  |
| 10 |  |
| 11 |  |
| 12 |  |
| 13 |  |
| 14 |  |
| 15 |  |
| 16 |  |
| 17 |  |
| 18 |  |
| 19 |  |
| 20 |  |
| 21 |  |
| 22 |  |
| 23 |  |
| 24 |  |
| 25 |  |
| 26 |  |
| 27 |  |
| 28 |  |
| 29 |  |
| 30 |  |
| 31 |  |
| 32 |  |
| 33 |  |
| 34 |  |
| 35 |  |
| 36 |  |
| 37 |  |
| 38 |  |
| 39 |  |
| 40 |  |
| 41 |  |
| 42 |  |
| 43 |  |
| 44 |  |
| 45 |  |
| 46 |  |

For peer review only



|    |  |
|----|--|
| 1  |  |
| 2  |  |
| 3  |  |
| 4  |  |
| 5  |  |
| 6  |  |
| 7  |  |
| 8  |  |
| 9  |  |
| 10 |  |
| 11 |  |
| 12 |  |
| 13 |  |
| 14 |  |
| 15 |  |
| 16 |  |
| 17 |  |
| 18 |  |
| 19 |  |
| 20 |  |
| 21 |  |
| 22 |  |
| 23 |  |
| 24 |  |
| 25 |  |
| 26 |  |
| 27 |  |
| 28 |  |
| 29 |  |
| 30 |  |
| 31 |  |
| 32 |  |
| 33 |  |
| 34 |  |
| 35 |  |
| 36 |  |
| 37 |  |
| 38 |  |
| 39 |  |
| 40 |  |
| 41 |  |
| 42 |  |
| 43 |  |
| 44 |  |
| 45 |  |
| 46 |  |

For peer review only



|    |  |
|----|--|
| 1  |  |
| 2  |  |
| 3  |  |
| 4  |  |
| 5  |  |
| 6  |  |
| 7  |  |
| 8  |  |
| 9  |  |
| 10 |  |
| 11 |  |
| 12 |  |
| 13 |  |
| 14 |  |
| 15 |  |
| 16 |  |
| 17 |  |
| 18 |  |
| 19 |  |
| 20 |  |
| 21 |  |
| 22 |  |
| 23 |  |
| 24 |  |
| 25 |  |
| 26 |  |
| 27 |  |
| 28 |  |
| 29 |  |
| 30 |  |
| 31 |  |
| 32 |  |
| 33 |  |
| 34 |  |
| 35 |  |
| 36 |  |
| 37 |  |
| 38 |  |
| 39 |  |
| 40 |  |
| 41 |  |
| 42 |  |
| 43 |  |
| 44 |  |
| 45 |  |
| 46 |  |

For peer review only

















**DEVELOPMENT AND JUSTIFICATION**

Factors related to the medication regimen are among the 5 main groups of determinants influencing medication adherence (WHO, 2003). The medication regimen for which adherence is to be managed can take different schematic forms and be of varying complexity, which may influence the complexity and extent of medication adherence. Medication adherence technologies may be developed for medications with different attributes, therefore ENABLE repository users should be able to indicate what type of medication regimen they are aiming to manage and how a technology fits these specific attributes.

We distinguished five descriptors relevant for medication adherence that refer to properties of medication regimens. The type of intention refers to the purpose of treatment as prevention or therapy, while the duration of treatment is related to the clinical course (e.g., acute/sudden-onset or chronic /latent-progressive course). Both depend on disease conditions and determine the purpose and duration of adherence management. The route of administration, the number of medications and the prescribed dosing frequency are the main components of the variability and complexity of prescribed regimens. Thus, descriptors related to these medication regimen attributes were identified in available ontologies (e.g., NCIT, MeSH and SNOMED-CT) and included in the list of descriptors.

It is important to note that we have selected, from among a broader range of routes of administration and types of dosing frequency, the ones we considered relevant for adherence to medication; for example, we have excluded 'as needed' dosing as it cannot be subject to a comparison between actual and prescribed dosing histories (the definition of adherence), and routes of administration likely to require a healthcare professional and thus be less influenced by adherence as a patient behavior.

| Upper Level                         | Sub-Level 1                   | Definition                                                                                                                                                                                                                        |
|-------------------------------------|-------------------------------|-----------------------------------------------------------------------------------------------------------------------------------------------------------------------------------------------------------------------------------|
| D2.4.1 Medication adherence phase   |                               | Time interval between the prescription start and end dates that is behaviorally distinct (i.e. linked with specific determinants)                                                                                                 |
|                                     | Initiation                    | Phase of adherence that covers the start of a prescribed treatment, i.e. the period from when the prescription is issued to the first dose taken (i.e. the initiation event)                                                      |
|                                     | Implementation                | Phase of adherence from the initiation until the last dose taken during which one can estimate the extent to which the patient's dose taking and timing are linked to the prescribed dosing                                       |
|                                     | Discontinuation (Persistence) | Phase of adherence that refers to the end of treatment execution and covers the period until last dose is taken, e.g. end of therapy or termination by patient. Persistence is the period between initiation and discontinuation. |
| D2.4.2 Type of adherence management |                               | The goal of adherence management that the technology is designed to address.                                                                                                                                                      |
|                                     | Monitoring/Measurement        | Type of adherence management that refers to estimating (repeatedly) medication adherence behaviours, determinants, and/or outcomes                                                                                                |
|                                     | Support/Intervention          | Type of adherence management that refers to generating change in medication adherence determinants and thus behaviours and outcomes.                                                                                              |
|                                     |                               |                                                                                                                                                                                                                                   |
|                                     |                               |                                                                                                                                                                                                                                   |
|                                     |                               |                                                                                                                                                                                                                                   |
|                                     |                               |                                                                                                                                                                                                                                   |
|                                     |                               |                                                                                                                                                                                                                                   |
|                                     |                               |                                                                                                                                                                                                                                   |
|                                     |                               |                                                                                                                                                                                                                                   |
|                                     |                               |                                                                                                                                                                                                                                   |
|                                     |                               |                                                                                                                                                                                                                                   |
|                                     |                               |                                                                                                                                                                                                                                   |
|                                     |                               |                                                                                                                                                                                                                                   |
|                                     |                               |                                                                                                                                                                                                                                   |
|                                     |                               |                                                                                                                                                                                                                                   |
|                                     |                               |                                                                                                                                                                                                                                   |
|                                     |                               |                                                                                                                                                                                                                                   |

1  
2  
3  
4  
5  
6  
7  
8  
9  
10  
11  
12  
13  
14  
15  
16  
17  
18  
19  
20  
21  
22  
23  
24  
25  
26  
27  
28  
29  
30  
31  
32  
33  
34  
35  
36  
37  
38  
39  
40  
41  
42  
43  
44  
45  
46































































1  
2  
3  
4  
5  
6  
7  
8  
9  
10  
11  
12  
13  
14  
15  
16  
17  
18  
19  
20  
21  
22  
23  
24  
25  
26  
27  
28  
29  
30  
31  
32  
33  
34  
35  
36  
37  
38  
39  
40  
41  
42  
43  
44  
45  
46

|  |  |
|--|--|
|  |  |
|  |  |
|  |  |
|  |  |
|  |  |
|  |  |
|  |  |

For peer review only

### DEVELOPMENT AND JUSTIFICATION

Technologies described in the ENABLE repository will be used either for self-management use by patients themselves or for supporting this process by health and social care providers within healthcare institutions or systems. The general term that describes both these use scenarios, according to the ABC taxonomy (Vrijens 2012), is “management of adherence”, i.e., “the process of monitoring and supporting patients' adherence to medications by health care systems, providers, patients, and or their social networks”. Thus, in this definition, a distinction is made between ‘monitoring’ (or measuring, which can target the behaviors themselves, their determinants, and/or their relevant outcomes), and ‘supporting’ adherence (or intervening to achieve best use of appropriately prescribed medicines by patients). As technologies may focus on one or both these goals, we have given the possibility for users to search for each goal/type of management (for example in situations when they would like to combine technologies into a broader adherence management solution). As both metrics and intervention may require different approaches depending on what phase of adherence is of concern, we have also given the possibility for users (and technologies) to specify which adherence phase they target, i.e.:

- 1) initiation, which “occurs when the patient takes the first dose of a prescribed medication”
- 2) implementation, which “is the extent to which a patient's actual dosing corresponds to the prescribed dosing regimen, from initiation until the last dose”

| Upper Level        | Sub-Level 1                  | Sub-level 2              | Sub-level 3   | Definition                                                                                                                                                                      |
|--------------------|------------------------------|--------------------------|---------------|---------------------------------------------------------------------------------------------------------------------------------------------------------------------------------|
| measurement method |                              |                          |               | the way in which information is gathered and summarized by the technology about the patient's medication adherence                                                              |
|                    | direct observation method    |                          |               | measurement method consisting in observing medication intake directly                                                                                                           |
|                    | pill count method            |                          |               | measurement method consisting in calculating left over pills in containers/blisters at a specific time point                                                                    |
|                    | self report method           |                          |               | measurement method using data reported by patients or caregivers about themselves                                                                                               |
|                    |                              | diary                    |               | self-report method in which the respondent records information about their current behaviors, determinants or outcomes at regular intervals                                     |
|                    |                              | questionnaire            |               | self-report method in which the respondent answers a set of pre-designed questions about their behaviors, determinants or outcomes                                              |
|                    |                              | interview / consultation |               | self-report method in which the respondent answers questions, either pre-defined or spontaneous, from another individual as part of a structured conversation                   |
|                    | Electronic monitoring method |                          |               | measurement method using data from devices that record medication taking events electronically                                                                                  |
|                    |                              | smart package            |               | electronic monitoring method that uses data from a container/dispenser in which the medication is packaged                                                                      |
|                    |                              |                          | smart box     | smart package that includes a method to record the opening and closing of the box in which the medication is stored for use                                                     |
|                    |                              |                          | smart inhaler | smart package that includes a method to record the use of the inhaler device in which medication is stored for use                                                              |
|                    |                              |                          | smart tube    | smart package that includes a method to record the use of the tube in which medication in ointment or liquid form is stored for use                                             |
|                    |                              |                          | smart button  | smart package that includes a device attached to private pillbox where medication is stored for use and includes a button on which the person can press to record a dose intake |
|                    |                              | smart pill               |               | electronic monitoring method that uses data from a mechanism integrated in the medication itself that records the ingestion of the medication                                   |

1  
2  
3  
4  
5  
6  
7  
8  
9  
10  
11  
12  
13  
14  
15  
16  
17  
18  
19  
20  
21  
22  
23  
24  
25  
26  
27  
28  
29  
30  
31  
32  
33  
34  
35  
36  
37  
38  
39  
40  
41  
42  
43  
44  
45  
46

|                    |                                       |                             |                           |                                                                                                                                                                            |
|--------------------|---------------------------------------|-----------------------------|---------------------------|----------------------------------------------------------------------------------------------------------------------------------------------------------------------------|
|                    |                                       | digital event record system |                           | digital technologies recording taking events (App, other devices)                                                                                                          |
|                    | Electronic Healthcare Database method |                             |                           | measurement method using routinely collected data as part of a longitudinal healthcare process                                                                             |
|                    |                                       | Electronic medical records  |                           | EHD method using data recorded in patients' medical records                                                                                                                |
|                    |                                       | Claims / dispensing         |                           | EHD method using data recorded for insurance claims purposes based on medication dispensed as part of the patients' care process                                           |
|                    |                                       | Record linkage system       |                           | EHD method using data recorded in several linked databases                                                                                                                 |
|                    | Laboratory method                     |                             |                           | measurement method based on clinical assessment through invasive procedure (e.g. body fluids samples)                                                                      |
|                    |                                       | drug concentration          |                           | laboratory methods consisting in the detection of sufficient drug levels in blood                                                                                          |
|                    |                                       |                             | intra patient variability | laboratory method indicating the fluctuation of drug concentration levels over a specific time period                                                                      |
|                    |                                       | biomarker                   |                           | laboratory method representing a surrogate for drug intake                                                                                                                 |
|                    |                                       | treatment response          |                           | laboratory method assessing clinical status as a proxy for adherence behaviours, e.g. habitus, lab results (blood glucose, Hba1c,) vital signs (blood pressure)            |
| measurement target |                                       |                             |                           | the component of the adherence causal (logic) model measured by the technology                                                                                             |
|                    | determinant measure                   |                             |                           | measurement targeting causal influences on the behaviour that can be modifiable (amenable to intervention with a medication adherence technology)                          |
|                    | behaviour measure                     |                             |                           | measurement targeting a self-management behaviour                                                                                                                          |
|                    |                                       | adherence measure           |                           | behaviour measure assessing to the patient's medication intake as compared to the prescribed regimen                                                                       |
|                    |                                       | alcohol intake measure      |                           | behaviour measure assessing the patient's intake of alcohol (frequency, type) on its own or in relation to treatment recommendations                                       |
|                    |                                       | diet measure                |                           | behaviour measure assessing the patient's intake of food (frequency, type) on its own or in relation to treatment recommendations                                          |
|                    |                                       | physical activity measure   |                           | behaviour measure assessing the patient's musculo-skeletal movements requiring energy expenditure (frequency, type) on its own or in relation to treatment recommendations |
|                    |                                       | tobacco use measure         |                           | behaviour measure assessing the patient's use of tobacco products                                                                                                          |































































1  
2  
3  
4  
5  
6  
7  
8  
9  
10  
11  
12  
13  
14  
15  
16  
17  
18  
19  
20  
21  
22  
23  
24  
25  
26  
27  
28  
29  
30  
31  
32  
33  
34  
35  
36  
37  
38  
39  
40  
41  
42  
43  
44  
45  
46

|  |  |  |
|--|--|--|
|  |  |  |
|  |  |  |
|  |  |  |
|  |  |  |
|  |  |  |
|  |  |  |
|  |  |  |
|  |  |  |
|  |  |  |
|  |  |  |

For peer review only

### DEVELOPMENT AND JUSTIFICATION

Throughout the last decades of medication adherence research, the mode of medication adherence measurement has evolved.

If a technology aims to monitor or measure adherence as part of the adherence management process it aims to facilitate, a broad range of options opens in terms of the measurement methods it can adopt, and which elements it targets, among those included in the causal (logic) model at the 'scientific core' of this process. To measure medication adherence, numerous methods have been developed: observing patients' medication intake directly, counting the remaining medication after a period of treatment, as well as various methods using self-report, electronic monitoring, electronic healthcare databases or laboratory tests. Moreover, measurement can target not only adherence behaviours but also adherence determinants, other self-management behaviours common in chronic care interventions (as described by Train4Health, a recent competency framework for the management of chronic conditions), and outcome measures such as health and quality of life. Users of the ENABLE repository may be interested to search for technologies that implement one type of measurement method, depending on the specificities of the setting in which they work (resources, acceptability, local expertise), or of the medication (e.g., mode of administration, pre-packaging). They may also be interested not only in measuring adherence behaviours, but also in technologies that integrate other elements of the causal model of self-management specific to the health condition they need to manage. Therefore, we have selected a range of measurement models (some of them with corresponding codes in SNOMED-CT, some based on methodological work in relevant domains), and followed the BCIO ontology and the Train4Health selection of self-management behaviours to offer the possibility to describe technologies from a measurement perspective.

1  
2  
3  
4  
5  
6  
7  
8  
9  
10  
11  
12  
13  
14  
15  
16  
17  
18  
19  
20  
21  
22  
23  
24  
25  
26  
27  
28  
29  
30  
31  
32  
33  
34  
35  
36  
37  
38  
39  
40  
41  
42  
43  
44  
45  
46

For peer review only

1  
2  
3  
4  
5  
6  
7  
8  
9  
10  
11  
12  
13  
14  
15  
16  
17  
18  
19  
20  
21  
22  
23  
24  
25  
26  
27  
28  
29  
30  
31  
32  
33  
34  
35  
36  
37  
38  
39  
40  
41  
42  
43  
44  
45  
46

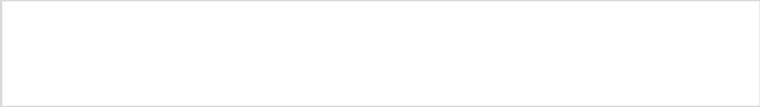

For peer review only

1  
2  
3  
4  
5  
6  
7  
8  
9  
10  
11  
12  
13  
14  
15  
16  
17  
18  
19  
20  
21  
22  
23  
24  
25  
26  
27  
28  
29  
30  
31  
32  
33  
34  
35  
36  
37  
38  
39  
40  
41  
42  
43  
44  
45  
46

| Upper level       | Sub-level 1                | Sub-level 2       | Sub-level 3                   | Definition                                                                                                                                                                                                                               |
|-------------------|----------------------------|-------------------|-------------------------------|------------------------------------------------------------------------------------------------------------------------------------------------------------------------------------------------------------------------------------------|
| Printed material  | Brochure                   |                   |                               | Mode of delivery that involves use of printed material                                                                                                                                                                                   |
|                   |                            |                   |                               | Printed material mode of delivery that involves use of a printed publication within a brochure                                                                                                                                           |
|                   | Printed media              |                   |                               | Printed material mode of delivery that uses formats of printed media to communicate and share information                                                                                                                                |
|                   |                            | Poster            |                               | Printed media mode of delivery that involves display of a poster in a public location.                                                                                                                                                   |
|                   |                            | Newspaper/leaflet |                               | Printed media mode of delivery that involves use of a printed publication in a newspaper or leaflet.                                                                                                                                     |
| Human interaction |                            |                   |                               | Mode of delivery that involves a person as intervention source who interacts with an intervention recipient                                                                                                                              |
|                   | Face to face consultations |                   |                               | Human interactional mode of delivery that involves an intervention source and recipient being together in the same location and communicating directly.                                                                                  |
|                   | Networks/patient groups    |                   |                               | are groups that meet in person to discuss their 'issues' or experiences related to their health condition and or medication                                                                                                              |
| Electronic        | Smart phone/tablet         |                   |                               | Mode of delivery that involves electronic technology in the presentation of information or the mode of motivation to an intervention recipient                                                                                           |
|                   |                            | Call              |                               | Electronic mode of delivery that involves communication processes                                                                                                                                                                        |
|                   |                            |                   | interactive messaging or chat | Electronic mode of delivery that involves a communication process in which a signal is sent by a caller to a recipient to alert them of the communication intent, giving the recipient the opportunity to engage with the communication. |
|                   |                            |                   | sms -short text message       | Call mode of delivery that involves textual information in the communication through interactive messaging or chat                                                                                                                       |
|                   |                            |                   | audio                         | Call mode of delivery that involves textual information in the communication.                                                                                                                                                            |
|                   |                            |                   | video                         | Call mode of delivery that involves only audio information in the communication                                                                                                                                                          |
|                   |                            |                   | email                         | Call mode of delivery that involves video and audio information in the communication                                                                                                                                                     |
|                   |                            |                   | application                   | Electronic mode of delivery that involves communication by email.                                                                                                                                                                        |
|                   |                            |                   |                               | Electronic mode of delivery that involves the intervention recipient interacting with a mobile application                                                                                                                               |

1  
2  
3  
4  
5  
6  
7  
8  
9  
10  
11  
12  
13  
14  
15  
16  
17  
18  
19  
20  
21  
22  
23  
24  
25  
26  
27  
28  
29  
30  
31  
32  
33  
34  
35  
36  
37  
38  
39  
40  
41  
42  
43  
44  
45  
46

|  |                            |                 |                                                                                                                                                                                                                                                                                      |
|--|----------------------------|-----------------|--------------------------------------------------------------------------------------------------------------------------------------------------------------------------------------------------------------------------------------------------------------------------------------|
|  |                            | interactivity   | Application mode of delivery that is interactive                                                                                                                                                                                                                                     |
|  |                            | diary           | Application mode of delivery that uses a diary to delivery a medication adherence intervention                                                                                                                                                                                       |
|  |                            | reminder system | Application mode of delivery that uses a reminder system to delivery a medication adherence intervention                                                                                                                                                                             |
|  |                            | gaming          | Application mode of delivery that uses gaming features to delivery a medication adherence intervention                                                                                                                                                                               |
|  | Wearable electronic device |                 | Electronic mode of delivery that includes medication related devices to support users to adhere to their treatment                                                                                                                                                                   |
|  | smart box                  |                 | smart package that records the opening and closing of the box in which the medication is stored for use                                                                                                                                                                              |
|  | smart inhaler              |                 | smart package that records the use of the inhaler device in which medication is stored for use                                                                                                                                                                                       |
|  | smart tube                 |                 | smart package that includes a method to record the use of the tube in which medication in ointment or liquid form is stored for use                                                                                                                                                  |
|  | smart button               |                 | smart package that includes a device attached to private pillbox where medication is stored for use and includes a button on which the person can press to record a dose intake                                                                                                      |
|  | digital media              |                 | Electronic mode of delivery that includes the use of electronic devices commonly used for mass-media communication                                                                                                                                                                   |
|  | Internet                   |                 | Electronic mode of delivery that involves presentation of information through the internet                                                                                                                                                                                           |
|  |                            | patient portals | Internet mode of delivery that allows patients to interact and communicate with other patients having the same health condition, treatment, and so on. these patient portals are not controlled on the quality of information shared and are available on the Internet at all hours. |
|  |                            | website         | Electronic mode of delivery that involves the intervention recipient interacting with a website.                                                                                                                                                                                     |
|  | social media               |                 | Electronic mode of delivery defined as online communication channels disseminate information to a huge audience world wide                                                                                                                                                           |
|  | broadcast media            |                 | Electronic mode of delivery that involves presentation of information through different mediums of media through a radio, television or billboard receiver.                                                                                                                          |
|  |                            | Radio           | Electronic mode of delivery that involves presentation of audio information that is broadcast and received by a radio receive                                                                                                                                                        |



1  
2  
3  
4  
5  
6  
7  
8  
9  
10  
11  
12  
13  
14  
15  
16  
17  
18  
19  
20  
21  
22  
23  
24  
25  
26  
27  
28  
29  
30  
31  
32  
33  
34  
35  
36  
37  
38  
39  
40  
41  
42  
43  
44  
45  
46

TV

Electronic mode of delivery that involves presentation of information that is broadcast and displayed by television

Billboard

Electronic mode of delivery that involves presentation of information by an electronic screen positioned in a public location.

|  |  |
|--|--|
|  |  |
|  |  |
|  |  |
|  |  |
|  |  |
|  |  |
|  |  |
|  |  |
|  |  |
|  |  |

For peer review only

### DEVELOPMENT AND JUSTIFICATION

Effective behaviour change interventions depend on a thorough evaluation and thoughtful selection of the mode of delivery of that specific intervention. The mode of delivery is defined as the 'physical or informational medium through which a given behaviour change intervention is provided'. To date, no ontology or other classification systems exist, to our knowledge, that categorize the mode of delivery of a medication adherence interventions. The Human Behaviour Change project, a collaborative research project aiming to create a 'Knowledge System' for using existing behaviour change interventions, is in process of creating ontologies to generate new insights about behaviour change. Within this project, scientists develop the Behaviour Change Intervention Ontology (BCIO), which is 'a set of definitions for entities and relationships used to describe behaviour change interventions, their contexts, effects and evaluations'. The modes of delivery attributes for the present repository were inspired from BCIO.

1  
2  
3  
4  
5  
6  
7  
8  
9  
10  
11  
12  
13  
14  
15  
16  
17  
18  
19  
20  
21  
22  
23  
24  
25  
26  
27  
28  
29  
30  
31  
32  
33  
34  
35  
36  
37  
38  
39  
40  
41  
42  
43  
44  
45  
46

|  |
|--|
|  |
|  |
|  |
|  |
|  |

For peer review only

|  |
|--|
|  |
|  |

1  
2  
3  
4  
5  
6  
7  
8  
9  
10  
11  
12  
13  
14  
15  
16  
17  
18  
19  
20  
21  
22  
23  
24  
25  
26  
27  
28  
29  
30  
31  
32  
33  
34  
35  
36  
37  
38  
39  
40  
41  
42  
43  
44  
45  
46

|  |  |
|--|--|
|  |  |
|  |  |
|  |  |

For peer review only

1  
2  
3  
4  
5  
6  
7  
8  
9  
10  
11  
12  
13  
14  
15  
16  
17  
18  
19  
20  
21  
22  
23  
24  
25  
26  
27  
28  
29  
30  
31  
32  
33  
34  
35  
36  
37  
38  
39  
40  
41  
42  
43  
44  
45  
46

For peer review only

1  
2  
3  
4  
5  
6  
7  
8  
9  
10  
11  
12  
13  
14  
15  
16  
17  
18  
19  
20  
21  
22  
23  
24  
25  
26  
27  
28  
29  
30  
31  
32  
33  
34  
35  
36  
37  
38  
39  
40  
41  
42  
43  
44  
45  
46

For peer review only

|  |  |  |
|--|--|--|
|  |  |  |
|  |  |  |

1  
2  
3  
4  
5  
6  
7  
8  
9  
10  
11  
12  
13  
14  
15  
16  
17  
18  
19  
20  
21  
22  
23  
24  
25  
26  
27  
28  
29  
30  
31  
32  
33  
34  
35  
36  
37  
38  
39  
40  
41  
42  
43  
44  
45  
46

|  |  |  |  |
|--|--|--|--|
|  |  |  |  |
|  |  |  |  |
|  |  |  |  |
|  |  |  |  |

For peer review only

| Upper Level                            | Sub-level 1 | Sub-level 2                                                     | Sub-level 3                 |
|----------------------------------------|-------------|-----------------------------------------------------------------|-----------------------------|
| individual-level behaviour determinant |             |                                                                 |                             |
|                                        | Capability  |                                                                 |                             |
|                                        |             | psychological capability                                        |                             |
|                                        |             |                                                                 | knowledge                   |
|                                        |             |                                                                 | psychological skills        |
|                                        |             |                                                                 | memory, attention, decision |
|                                        |             |                                                                 |                             |
|                                        |             |                                                                 | behavioral regulation       |
|                                        |             | physical capability/skills                                      |                             |
|                                        | Opportunity |                                                                 |                             |
|                                        |             | social opportunity/influences                                   |                             |
|                                        |             | physical opportunity/<br>environmental context and<br>resources |                             |
|                                        | Motivation  |                                                                 |                             |
|                                        |             | reflective motivation                                           |                             |
|                                        |             |                                                                 | role & identity             |

For peer review only



1  
2  
3  
4  
5  
6  
7  
8  
9  
10  
11  
12  
13  
14  
15  
16  
17  
18  
19  
20  
21  
22  
23  
24  
25  
26  
27  
28  
29  
30  
31  
32  
33  
34  
35  
36  
37  
38  
39  
40  
41  
42  
43  
44  
45  
46

beliefs about capabilities

optimism

beliefs about consequences

intentions

goals

automatic motivation

reinforcement

emotion

For peer review only

**Definition**

modifiable causal influences on medication adherence that reside within an individual person

behaviour determinant referring to what an individual can do themselves to take medication as agreed

behaviour determinant referring to the mental capabilities that help individuals themselves take medication as agreed

psychological capability referring to what an individual knows about taking medication as agreed for their condition

psychological capability referring to what an individual is good at doing to take medication as agreed

psychological capability referring to the individual's abilities to retain information, to focus on specific things, and to choose between different things that help individuals take medication as agreed

psychological capability referring to what an individual can do themselves to keep track of taking medication and change their habitual ways of doing this

behaviour determinant referring to the physical capabilities that help the individual take medication as agreed

behaviour determinant referring to the conditions in the individual's external environment that can facilitate medication adherence

behaviour determinant referring to the conditions in the social environment

behaviour determinant referring to the conditions in the physical environment

behaviour determinant referring to what extent the individual feels driven/willing/energised to take medication as agreed

behaviour determinant referring to the extent of feeling motivated to take medication as agreed by thinking about it

reflective motivation referring to how the individual perceives what they need to do and how they are in their social personal and/or professional environment

1  
2 reflective motivation referring to how the individual thinks about  
3 whether they can take their medication as agreed in various  
4 situations

5 reflective motivation referring to the confidence that the individual  
6 will succeed in their efforts to take medication and manage their  
7 condition

8 reflective motivation referring to what the individual thinks about  
9 the effects of taking medication on their health and/or other life  
10 goals

11 reflective motivation referring to whether the individual has taken a  
12 conscious decision to take medication as agreed

13 reflective motivation referring to how the individual represents in  
14 their mind the fact of taking medication as agreed, or other life goals  
15 related to their treatment

16 behaviour determinant referring to the extent of feeling motivated  
17 to take medication as agreed by emotions and impulses occurring  
18 automatically

19 automatic motivation referring to how taking medication as agreed  
20 is associated repeatedly to external stimuli that make it more likely  
21 to happen

22 automatic motivation referring to how taking medication as agreed  
23 is associated to individual's reactions to cope with personally  
24 significant stimuli

## DEVELOPMENT AND JUSTIFICATION

Numerous factors influencing medication adherence have been identified in the research literature. The term commonly employed in research is 'determinants of behaviour', and an important distinction is made between modifiable and non-modifiable determinants, depending on whether these are amenable to change by an intervention within the specific context. Modifiable determinants are also named 'mechanisms of action' when they are part of a behaviour change intervention scenario as a process through which change is affected on a behaviour. Among the determinants studied and targeted by adherence support interventions/technologies, most are patient-related, although several may be related to the therapy/medication, condition, socio-economic context, or the healthcare system. Patient-related adherence determinants include for example the individual's beliefs about the medication, their health condition, their habits and ways of coping with changes in routine.

A substantial body of research has been conducted using a diverse range of concepts, theories and frameworks from health psychology and behavioural medicine. This research resulted in a vast number of constructs, not all relevant for adherence. Therefore, a selection was necessary for the purposes of the ENABLE repository. Recently, these have been systematized via literature review and expert consensus in the Capability, Opportunity, Motivation and Behaviour (COM-B) model, Behaviour Change Wheel and the Theoretical Domains framework, a group of related tools aimed to facilitate the description and development of interventions and the synthesis of scientific evidence on behaviour change. These tools have been increasingly used in health research, including in supporting medication adherence. Three main categories of individual determinants are proposed in the COM-B model, each with two subcategories: Capability (psychological and physical), Opportunity (social and physical), and Motivation (reflective and automatic). For each subcategory, up to six theoretical domains of behaviour determinants have been identified by grouping similar constructs from different sources, resulting in a total of 14 distinct domains.

The terminology of behaviour determinants is currently evolving. Recently, 12 new categories have been added to the 14 TDF domains resulting in 26 mechanisms of action mapped onto the current classification of behaviour change techniques for evidence synthesis purposes. The Mechanisms of Action (MoA) Ontology is currently under development. Some determinant categories are named and structured differently in the MoA ontology version 1 as compared with COM-B and TDF structures, and the terminology is likely to continue to evolve in the following years. Therefore, we have adopted the COM-B/TDF classification, as it has been in use for research for the last years. Some simplifications have been applied from the structure proposed by Cane et al. (2012) to avoid duplication (i.e., the categories of role and identity and optimism were considered only in the reflective motivation category, although they can pertain also to automatic motivation); we kept the distinction between psychological skills and physical skills, as these are likely to be targeted separately in adherence technologies.

1  
2  
3  
4  
5  
6  
7  
8  
9  
10  
11  
12  
13  
14  
15  
16  
17  
18  
19  
20  
21  
22  
23  
24  
25  
26  
27  
28  
29  
30  
31  
32  
33  
34  
35  
36  
37  
38  
39  
40  
41  
42  
43  
44  
45  
46

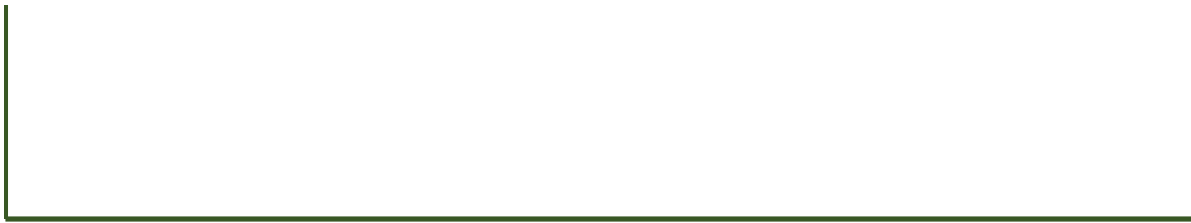

For peer review only

| Upper Level          | Sub-Level 1               | Sub-Level 2                              | Definition                                                                                                                                                                            |                                                                                                                                                                                                                              |                                                                                                                                                                                                                                                |
|----------------------|---------------------------|------------------------------------------|---------------------------------------------------------------------------------------------------------------------------------------------------------------------------------------|------------------------------------------------------------------------------------------------------------------------------------------------------------------------------------------------------------------------------|------------------------------------------------------------------------------------------------------------------------------------------------------------------------------------------------------------------------------------------------|
| Acting on Capability | Feedback and monitoring   |                                          | Group of behaviour change techniques aiming to influence what an individual can do themselves to take medication as agreed with the healthcare provider                               |                                                                                                                                                                                                                              |                                                                                                                                                                                                                                                |
|                      |                           |                                          | The technology includes options to record medication intake and its effects, and feed this information back to the user                                                               |                                                                                                                                                                                                                              |                                                                                                                                                                                                                                                |
|                      |                           | Biofeedback                              | The technology includes an option/activity to record physiological/biochemical effects of taking medication as agreed with the healthcare provider.                                   |                                                                                                                                                                                                                              |                                                                                                                                                                                                                                                |
|                      |                           | Feedback or self-monitoring on behaviour | The technology includes an option/activity to monitor and feedback on adherence behaviours (by the medication users themselves or other people who can relay the information to them) |                                                                                                                                                                                                                              |                                                                                                                                                                                                                                                |
|                      | Repetition & substitution |                                          | Feedback or self-monitoring on outcomes                                                                                                                                               | The technology includes an option/activity to monitor and feedback on a positive outcome of adherence behaviours (by the medication users themselves or other people who can relay the information to them)                  |                                                                                                                                                                                                                                                |
|                      |                           |                                          |                                                                                                                                                                                       | The technology includes options/activities to perform certain actions repeatedly and systematically in order to enforce medication adherence behaviours and replace other behaviours not beneficial for medication adherence |                                                                                                                                                                                                                                                |
|                      |                           |                                          | habit formation                                                                                                                                                                       | The technology includes ways to prompt rehearsal and repetition of medication intake in the same context repeatedly at the planned time for intake, so that the context elicits adherence                                    |                                                                                                                                                                                                                                                |
|                      |                           | Shaping knowledge                        |                                                                                                                                                                                       | behavioral practice/ rehearsal                                                                                                                                                                                               | The technology includes ways to prompt practice or rehearsal of medication intake in a context or at a time when it may not be necessary, in order to increase adherence habit and skill                                                       |
|                      |                           |                                          |                                                                                                                                                                                       | graded tasks                                                                                                                                                                                                                 | The technology includes options to set easy-to-perform tasks related to medication intake, making them increasingly difficult until adherence becomes achievable in all situations                                                             |
|                      |                           |                                          |                                                                                                                                                                                       |                                                                                                                                                                                                                              | The technology includes options for the user to learn about how to take medication as agreed with the healthcare provider, what they can do themselves to stick to the schedule in difficult situations, and test different ways of doing this |

1  
2  
3  
4  
5  
6  
7  
8  
9  
10  
11  
12  
13  
14  
15  
16  
17  
18  
19  
20  
21  
22  
23  
24  
25  
26  
27  
28  
29  
30  
31  
32  
33  
34  
35  
36  
37  
38  
39  
40  
41  
42  
43  
44  
45  
46

Acting on Opportunity

Demonstration of behaviour

Prompts & cues

Restructuring the physical environment & adding objects

Identity

Acting on Motivation

Goals and planning

Action planning

Discrepancy between current behaviour and goals

Goal setting & reviewing (behaviour)

Goal setting & reviewing (outcome)

Problem solving

pros & cons

Group of behaviour change techniques aiming to influence the conditions in the individual's external environment that can facilitate medication adherence

The technology includes an observable sample of how to take medication as agreed, directly in person or indirectly (video, pictures, drawings)

The technology includes ways to prompt medication intake at the agreed time

The technology includes advice on how to change the environment to make it easier to take medication as agreed with the healthcare provider.

The technology includes ways of strengthening a positive identity that includes taking medication as agreed with the healthcare provider.

Group of behaviour change techniques aiming to influence to what extent the individual feels driven/willing/energised to take medication as agreed with the healthcare provider.

The technology includes options to encourage setting goals related to adherence and planning to achieve them

The technology includes an option/activity for the user to plan concretely how they will take the medication.

The technology includes an option/activity to compare the user's adherence-related goals with their current adherence behaviour

The technology includes an option/activity to set or agree on a goal in terms of an adherence behaviour, and review this goal in light of achievement

The technology includes an option/activity to set or agree on a goal in terms of an outcome of adherence, and review this goal in light of achievement

The technology includes an option/activity to identify barriers & facilitators of their own adherence and propose solutions to overcome / increase them

The technology includes ways to identify and compare reasons for wanting or not wanting to take medication as agreed with the healthcare provider.

|    |                       |                             |                                                                      |
|----|-----------------------|-----------------------------|----------------------------------------------------------------------|
| 1  |                       |                             |                                                                      |
| 2  |                       | Regulation                  | The technology includes advice and/or options/activities aiming to   |
| 3  |                       |                             | keep motivation for medication adherence within a range favourable   |
| 4  |                       |                             | for performing adherence-related behaviours.                         |
| 5  |                       | conserving mental resources | The technology includes advice on how to make taking medication      |
| 6  |                       |                             | less demanding for the person                                        |
| 7  |                       | reducing negative emotions  | The technology includes ways of reducing negative emotions in        |
| 8  |                       |                             | relation to taking medication                                        |
| 9  |                       | Self-belief                 | The technology includes ways of increasing the person's confidence   |
| 10 |                       |                             | they can take medication as agreed with the healthcare provider.     |
| 11 |                       |                             |                                                                      |
| 12 |                       | Imaginary reward            | The technology includes advice on how to imagine correct             |
| 13 |                       |                             | performance of medication intake                                     |
| 14 | Acting across domains |                             | Group of behaviour change techniques aiming to influence             |
| 15 |                       |                             | determinants from more than one determinant group (capability,       |
| 16 |                       |                             | opportunity, motivation)                                             |
| 17 |                       |                             |                                                                      |
| 18 |                       | Social support (emotional   | The technology includes options to advise, arrange or provide social |
| 19 |                       | and practical)              | support (practical, emotional, other), or praise/reward taking       |
| 20 |                       |                             | medication as agreed with the healthcare provider.                   |
| 21 |                       | Social reward               | The technology includes verbal/non-verbal rewards when the patient   |
| 22 |                       |                             | shows effort and/or progress in taking medication as agreed with the |
| 23 |                       |                             | healthcare provider.                                                 |
| 24 |                       |                             |                                                                      |
| 25 |                       | Information about           | The technology includes information about consequences (health-      |
| 26 |                       | consequences                | related, emotional, social, environmental) of medication adherence   |
| 27 |                       |                             | (or non-adherence), and emphasise their relevance for the person     |
| 28 |                       |                             |                                                                      |
| 29 |                       |                             |                                                                      |
| 30 |                       |                             |                                                                      |
| 31 |                       |                             |                                                                      |
| 32 |                       |                             |                                                                      |
| 33 |                       |                             |                                                                      |
| 34 |                       |                             |                                                                      |
| 35 |                       |                             |                                                                      |
| 36 |                       |                             |                                                                      |
| 37 |                       |                             |                                                                      |
| 38 |                       |                             |                                                                      |
| 39 |                       |                             |                                                                      |
| 40 |                       |                             |                                                                      |
| 41 |                       |                             |                                                                      |
| 42 |                       |                             |                                                                      |
| 43 |                       |                             |                                                                      |
| 44 |                       |                             |                                                                      |
| 45 |                       |                             |                                                                      |
| 46 |                       |                             |                                                                      |



---

## DEVELOPMENT AND JUSTIFICATION

To trigger/support change in a health behaviour like medication adherence, interventions (whether mediated by technologies or not) act by generating change in determinants of the target behaviour. They do so in the same way that medications act on improving health outcomes by triggering changes in pathophysiological mechanisms of the health condition they aim to treat. The 'active ingredients' for behavioural health interventions have been labelled behaviour change techniques (BCT). For example, a reminder set within a medication adherence app on the user's smartphone to prompt medication intake at the agreed time is an application of a BCT in the category 'Prompts & cues', that acts on the 'Opportunity' group of determinants as it modifies the conditions in the user's environment that can facilitate medication adherence.

Evidence on effects of these BCTs on different behaviours has been accumulating and has been recently systematized based on the BCT taxonomy, a consensus classification of 93 BCTs that organizes theoretical constructs in this field (ref). The BCT taxonomy is currently part of the Human Behaviour Change Project and interoperable with the models and ontologies used in the other descriptor groups. It has been used extensively in the last decade in intervention description, development, validation and implementation, as well as in evidence synthesis and training of healthcare professionals.

However, not all techniques included in this taxonomy are relevant for medication adherence support. The ENABLE repository would need to include only BCTs relevant for adherence support technologies and be compatible with other tools used for behaviour change training and practice in healthcare systems.

Two applications of the BCT taxonomy to healthcare professional training on behaviour change simplify the structure and provide solutions for the ENABLE repository. The first, Cards for Change, is a simplified version of the taxonomy for development of training content for HCP behaviour change that has been used already in several countries as part of the Change Exchange Initiative (ref). It builds on a tool developed for coding training sessions in healthcare professional continuous education (ref) and includes the most used techniques in healthcare settings with examples of possible training activities. The second is the Train4health competency framework, a consensus-based framework for professionals who support self-management of chronic conditions in Europe developed by the Train4Health project, funded via the Erasmus+ programme (ref). The framework identified a set of 12 foundational competencies and 14 behaviour change competencies, including knowledge and abilities to identify relevant behaviours, intervention models, BCTs and apply these collaboratively to develop and implement self-management programmes. A panel of experts selected the most relevant BCTs for the 5 priority behaviours, including medication adherence support, physical activity, diet, smoking cessation and symptom monitoring and management.

We have therefore selected 24 categories of BCTs consistent with the selections operated by the Train4Health consortium and the Cards for Change team, to align the terminology with healthcare professionals training programmes that are currently using or will be developed in the future using these tools. Some BCT categories were merged due to common co-occurrence (e.g., feedback and monitoring; shaping knowledge techniques), and some BCTs are present in C4C but not in T4H since the former is more comprehensive than the latter. The initial ENABLE descriptor list includes only user-level BCTs (i.e., BCTs that can be included in technologies that provide support to medication users); if considered relevant, future versions can include HCP-level interventions (e.g., training programmes) or organisation/system-level BCTs. To align this set of descriptors with the ones referring to adherence determinants, we have grouped the 24 categories into 4 dimensions (i.e., acting on Capability, Opportunity, Motivation, cross domains), using the theoretical mapping described by Cane et al. and previously applied in evidence synthesis in health behaviour change. Mapping work is ongoing and likely to be updated with further iterations of these ontologies. We have therefore chosen the terms most used currently and expect back-compatibility in future versions.

It is important to note that a new classification by WHO is currently under development for health interventions which includes terminology for behavioural interventions: International Classification of Health Interventions (ICHI). Currently, ICHI is designed to be interoperable with the COM-B model via a series of extension codes. However, for describing categories of health interventions, the ICHI classification uses over 20 terms, different from the behaviour change literature, that cover measurement (Assessment, Testing), several broader categories on individual-level intervention

1 from the behaviour change literature, that cover measurement (Assessment, Testing), several broader categories on individual-level intervention  
2 (Training, Education, Advising, Counselling, Emotional support, Provision of products to support, Provision of peer support), as well as health system and  
3 societal level interventions (Providing opportunities for participation, Advocacy, Building partnerships, Public facilities, Environment modification,  
4 Capacity building, Awareness raising, Public health surveillance, Health alerts, Enactment and enforcement of legislation, Economic and non-economic  
5 incentives, Policy change, Other). Ensuring interoperability between ICHI and the BCIO ontologies is under discussion.  
6  
7  
8  
9  
10  
11  
12  
13  
14  
15  
16  
17  
18  
19  
20  
21  
22  
23  
24  
25  
26  
27  
28  
29  
30  
31  
32  
33  
34  
35  
36  
37  
38  
39  
40  
41  
42  
43  
44  
45  
46

For peer review only

1  
2  
3  
4  
5  
6  
7  
8  
9  
10  
11  
12  
13  
14  
15  
16  
17  
18  
19  
20  
21  
22  
23  
24  
25  
26  
27  
28  
29  
30  
31  
32  
33  
34  
35  
36  
37  
38  
39  
40  
41  
42  
43  
44  
45  
46

| Upper level              | Sub-level 1                    | Sub-level 2                                          |
|--------------------------|--------------------------------|------------------------------------------------------|
| health care professional |                                |                                                      |
|                          | medical doctor                 |                                                      |
|                          |                                | generalist medical practitioner                      |
|                          |                                | specialist medical practitioner                      |
|                          | nursing professional           |                                                      |
|                          | midwifery professional         |                                                      |
|                          | pharmacist                     |                                                      |
|                          |                                | community pharmacist<br>hospital/clinical pharmacist |
|                          | dentist                        |                                                      |
|                          | associated health professional |                                                      |
|                          |                                | community healthcare worker                          |

For peer review only

1  
2  
3  
4  
5  
6  
7  
8  
9  
10  
11  
12  
13  
14  
15  
16  
17  
18  
19  
20  
21  
22  
23  
24  
25  
26  
27  
28  
29  
30  
31  
32  
33  
34  
35  
36  
37  
38  
39  
40  
41  
42  
43  
44  
45  
46

health care assistant

psychosocial care professional

psychologist

Personal care worker

Personal provider

family member

parent or guardian

spouse or partner

other

carer

friend

peer

For peer review only

**Definition**

An intervention provider that applies scientific knowledge in medicine, nursing, midwifery, pharmacy, dentistry and/or health promotion to support patients in

A health professional that studies, diagnoses, treats and prevents illness, disease, injury and other physical and mental impairments.

A medical doctor that does not limit their practice to certain disease categories or methods of treatment, and may assume responsibility for the provision of continuing and comprehensive medical care to individuals, families and communities

A medical doctor that specializes in certain disease categories, types of patients or methods of treatment and may conduct medical education and research in their chosen areas of specialization.

A health professional that provides treatment, support and care services for people who are in need of nursing care due to the effects of ageing, injury, illness or other physical or mental impairment, or potential risks to health.

A health professional that plans, manages, provides and evaluates midwifery care services before, during and after pregnancy and childbirth.

A health professional that stores, preserves, compounds and dispenses medicinal products and counsel on the proper use and adverse effects of drugs and medicines following prescriptions issued by medical doctors and other health professionals.

A pharmacist that practices in primary care/ community settings.

A pharmacist that practices in secondary care / hospital settings.

A health professional that diagnoses treats and prevents diseases, injuries and abnormalities of the teeth, mouth, jaws and associated tissues.

A health professional that performs technical and practical tasks to support diagnosis and treatment of illness, disease, injuries and impairments, and supports the implementation of health care usually established by medical, nursing and other health professionals

Associated health professional that provides health education, referral and follow-up, case management, basic preventive health care and home visiting services to specific communities.

1  
2 Associated health professional that provides basic care services for the  
3 prevention and treatment of diseases and disorders, according to care plans  
4 and procedures established by medical, nursing or other health professionals.  
5

6 An intervention provider that applies scientific knowledge in psychology,  
7 sociology and other social sciences to support individuals and families in a  
8 community in their well-being and life goals  
9

10 A social professional that studies the mental processes and behaviour of human  
11 beings as individuals or in groups, and applies this knowledge to promote  
12 personal, social, educational or occupational adjustment and development  
13

14 An intervention provider that delivers care, supervision and assistance for  
15 children, patients and elderly, convalescent or disabled persons in institutional  
16 and residential settings.  
17

18 an intervention provider that is related to the person to whom the intervention  
19 is targeted through aspects of their personal lives.

20 A personal provider who is related to another person as they are descended  
21 from a common progenitor, related by marriage or other legal tie, or by a  
22 feeling of closeness.

23 A family member that is a mother, father or legal carer of the person to whom  
24 the intervention is targeted

25 A family member that is an individual who is married or in a committed  
26 relationship with the person to whom the intervention is targeted

27 A family member that is a child, sibling or in the extended family (e.g. uncle,  
28 aunt, nephew) with the person to whom the intervention is targeted  
29

30  
31 A personal provider who is an individual who cares, unpaid, for a friend or  
32 family member who is the person to whom the intervention is targeted

33 A personal provider who is an individual who is known, liked and trusted by the  
34 person to whom the intervention is targeted, typically exclusive of sexual or  
35 family relations

36 A personal provider who is described as similar to the person to whom the  
37 intervention is targeted on the basis of similarities in age, social status, gender,  
38 experience, health status  
39  
40  
41  
42  
43  
44  
45  
46

1  
2  
3  
4  
5  
6  
7  
8  
9  
10  
11  
12  
13  
14  
15  
16  
17  
18  
19  
20  
21  
22  
23  
24  
25  
26  
27  
28  
29  
30  
31  
32  
33  
34  
35  
36  
37  
38  
39  
40  
41  
42  
43  
44  
45  
46

**DEVELOPMENT AND JUSTIFICATION**

The provider or source of intervention is a role played by a person, population or organization that provides/delivers a given intervention. This includes their occupational role, education, sociodemographic, knowledge, skills and any relatedness between them and the target population. In terms of medication adherence, the provider is often HCP. The quality of the HCP-patient relationships, especially communication skills, collaborative decision making, trust in the HCP and HCPs' cultural competences, are in correlation with patients' adherence. Several different professions of intervention providers were recognized as the most influential OR relevant in relation to medication adherence of patients using the Intervention Source Ontology Coding Guidelines and Gender, Sex, and Sexual Orientation (GSSO) ontology.

For peer review only

| Upper level      | Sub-level 1          | Sub-level 2                      | Sub-level 3                         | Definition                                                                                                                                                                                                  |
|------------------|----------------------|----------------------------------|-------------------------------------|-------------------------------------------------------------------------------------------------------------------------------------------------------------------------------------------------------------|
| Physical setting |                      |                                  |                                     | Intervention setting that consists in a physical environment where the medication adherence technology is used.                                                                                             |
|                  | Residential facility |                                  |                                     | A physical setting that has at least one housing unit as part in which a person to whom the intervention is targeted lives.                                                                                 |
|                  |                      | Household residence              |                                     | Residential facility where a person to whom the intervention is targeted lives alone or with one or more persons.                                                                                           |
|                  |                      |                                  | Residential care or assisted living | Household residence where many vulnerable persons live.                                                                                                                                                     |
|                  |                      |                                  | Student residence                   | Household residence where many students live.                                                                                                                                                               |
|                  | Healthcare facility  |                                  |                                     | A physical setting that is administered by a health care organisation for the purpose of providing health care to a patient population.                                                                     |
|                  |                      | Hospital facility                |                                     | healthcare facility that is run by a hospital organisation and is the bearer of a hospital function.                                                                                                        |
|                  |                      | Doctor-led primary care facility |                                     | A healthcare facility led by doctors                                                                                                                                                                        |
|                  |                      | Care home facility               |                                     | A healthcare facility that is run by a care home organization and is the bearer of a care home function                                                                                                     |
|                  |                      | Hospice facility                 |                                     | A healthcare facility that bears a function to provide healthcare to the sick or terminally ill                                                                                                             |
|                  |                      | Pharmacy facility                |                                     | A healthcare facility whose function is to store, prepare, dispense and monitor the usage of pharmaceutical drugs among patients in a given area or encountered in a given healthcare provider organization |
|                  |                      | Psychiatric facility             |                                     | A healthcare facility designed and staffed to house and treat individuals that need assistance with mental health                                                                                           |
|                  |                      | Community healthcare facility    |                                     | A healthcare facility providing healthcare services to people in a certain area.                                                                                                                            |
|                  | Educational facility | Dentist facility                 |                                     | A healthcare facility where dental healthcare is provided                                                                                                                                                   |
|                  |                      |                                  |                                     | A physical setting in which formal education is provided to a student population                                                                                                                            |



1  
2  
3  
4  
5  
6  
7  
8  
9  
10  
11  
12  
13  
14  
15  
16  
17  
18  
19  
20  
21  
22  
23  
24  
25  
26  
27  
28  
29  
30  
31  
32  
33  
34  
35  
36  
37  
38  
39  
40  
41  
42  
43  
44  
45  
46

Community facility

A physical setting used by a group of people living in the same area or having a particular characteristic in common

Social centre or Community Hall facility

A community facility used for socialising by those living in a given area.

Virtual setting

Intervention setting that consists in a virtual environment where the medication adherence technology is used.

Telemedicine

Virtual setting through which healthcare services are delivered by medical doctors

Telepharmacy

Virtual setting through which healthcare services are delivered by pharmacists

For peer review only

#### DEVELOPMENT AND JUSTIFICATION

Implementation and behavioral science emphasize the importance of understanding and describing the environment in which a certain intervention is delivered as it can significantly influence its outcomes. In addition, not every intervention is applicable or transferable to every setting. Similar to the mode of delivery, we can distinguish between physical and virtual settings. Healthcare services may be provided in different healthcare facilities using different technologies and adherence intervention models. Thus, the efficacy of direct in-person models of adherence intervention may be different than indirect interventions such as electronic strategies. Some interventions may be applicable in both types of settings, or require a combination of physical and virtual settings in order to be performed. The classification was made using the Intervention Setting Ontology, which is a component of the Behaviour Change Interventions Ontology (BCIO).

For peer review only

1  
2  
3  
4  
5  
6  
7  
8  
9  
10  
11  
12  
13  
14  
15  
16  
17  
18  
19  
20  
21  
22  
23  
24  
25  
26  
27  
28  
29  
30  
31  
32  
33  
34  
35  
36  
37  
38  
39  
40  
41  
42  
43  
44  
45  
46  
47  
48  
49  
50  
51  
52  
53  
54  
55  
56  
57  
58  
59  
60

| Upper Level                       | Sub-Level 1                         | Sub-Level 2                     |
|-----------------------------------|-------------------------------------|---------------------------------|
| D3.1.1 General quality indicators | ISO certification                   | Research base on development    |
|                                   | Evidence from scientific evaluation | Research base on effectiveness  |
|                                   |                                     | Ethical and legal aspects       |
|                                   | Development standards               | Development process             |
|                                   |                                     | User-centered design process    |
|                                   |                                     | Conflict of Interest            |
|                                   |                                     | Updating of information sources |
|                                   | Technological standards             | Performance                     |
|                                   |                                     | Data protection                 |

1  
2  
3  
4  
5  
6  
7  
8  
9  
10  
11  
12  
13  
14  
15  
16  
17  
18  
19  
20  
21  
22  
23  
24  
25  
26  
27  
28  
29  
30  
31  
32  
33  
34  
35  
36  
37  
38  
39  
40  
41  
42  
43  
44  
45  
46  
47  
48  
49  
50  
51  
52  
53  
54  
55  
56  
57  
58  
59  
60

D3.1.2 Research-related quality indicators

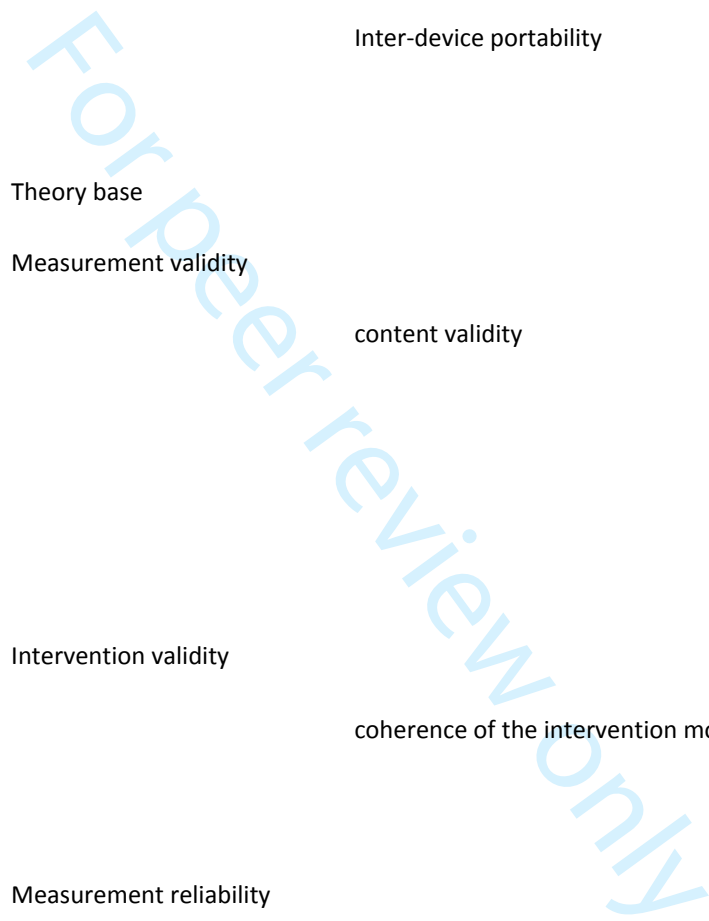

System integration testing

Inter-device portability

Theory base

Measurement validity

content validity

Intervention validity

coherence of the intervention model

Measurement reliability

Internal consistency

Inter-rater reliability

Test-retest reliability

D3.1.3 Policy-related quality indicators

Cost and economic evaluation

Cost-effectiveness

1  
2  
3  
4  
5  
6  
7  
8  
9  
10  
11  
12  
13  
14  
15  
16  
17  
18  
19  
20  
21  
22  
23  
24  
25  
26  
27  
28  
29  
30  
31  
32  
33  
34  
35  
36  
37  
38  
39  
40  
41  
42  
43  
44  
45  
46  
47  
48  
49  
50  
51  
52  
53  
54  
55  
56  
57  
58  
59  
60

- Cost-utility
- Cost-consequence
- Cost-benefit
- Cost-minimisation
- Budget impact
- Country(ies) where evaluation performed
- Current use of the technology
- Regulatory status
- Usability
- Simplicity
- Cleanliness
- Intuitiveness
- Reliability

D3.1.4 Use-related quality indicators

1  
2  
3  
4  
5  
6  
7  
8  
9  
10  
11  
12  
13  
14  
15  
16  
17  
18  
19  
20  
21  
22  
23  
24  
25  
26  
27  
28  
29  
30  
31  
32  
33  
34  
35  
36  
37  
38  
39  
40  
41  
42  
43  
44  
45  
46  
47  
48  
49  
50  
51  
52  
53  
54  
55  
56  
57  
58  
59  
60

Satisfaction

Satisfaction test

Customisation

Customisation of language

Aesthetics

Readability

For peer review only

1  
2  
3  
4  
5  
6  
7  
8  
9  
10  
11  
12  
13  
14  
15  
16  
17  
18  
19  
20  
21  
22  
23  
24  
25  
26  
27  
28  
29  
30  
31  
32  
33  
34  
35  
36  
37  
38  
39  
40  
41  
42  
43  
44  
45  
46  
47  
48  
49  
50  
51  
52  
53  
54  
55  
56  
57  
58  
59  
60

**Sub-Level 3**      **Sub-Level 4**

Quality of evidence on development

Quality of evidence on effectiveness

Usability tests

Reliability of interactive components  
Design scalability of the technology

For peer review only

1  
2 Data encryption  
3

4  
5 Antivirus with supported  
6 maintenance  
7

8  
9 Data storage place  
10

11 Data storage capacity  
12 Protection against theft  
13 or physical attacks  
14  
15  
16  
17  
18  
19  
20  
21  
22  
23  
24  
25  
26  
27

28  
29 face validity  
30

31  
32 language validation  
33

34 target population  
35 validation  
36  
37  
38  
39  
40  
41  
42  
43  
44  
45  
46  
47  
48  
49  
50  
51  
52  
53  
54  
55  
56  
57  
58  
59  
60

For peer review only



1  
2 vs no intervention  
3  
4 vs other interventions  
5

6  
7  
8  
9  
10  
11  
12  
13  
14  
15  
16  
17  
18  
19  
20  
21  
22  
23  
24  
25  
26  
27  
28  
29  
30  
31  
32

33  
34  
35 Authorisation status  
36  
37 Country(ies) where  
38 approved  
39 Approval body(ies)  
40  
41 Indication(s) approved  
42

43 Reimbursement status  
44  
45  
46 Country(ies) where  
47 Indication(s) reimbursed  
48  
49  
50  
51  
52  
53  
54  
55  
56  
57  
58  
59  
60

For peer review only

1  
2  
3  
4  
5  
6  
7  
8  
9  
10  
11  
12  
13  
14  
15  
16  
17  
18  
19  
20  
21  
22  
23  
24  
25  
26  
27  
28  
29  
30  
31  
32  
33  
34  
35  
36  
37  
38  
39  
40  
41  
42  
43  
44  
45  
46  
47  
48  
49  
50  
51  
52  
53  
54  
55  
56  
57  
58  
59  
60

For peer review only

**Definition**

Quality indicators that evaluate MATech characteristics relevant for all stages of the technology development, adoption and use.

General QI referring to whether the MATech has obtained one or more ISO certification labels relevant for its content and purpose.

General QI referring to whether the MATech has been evaluated through the systematic, rigorous, and meticulous application of scientific methods, and the evidence obtained

Evidence from scientific evaluation is available to support the design of the MATech.

Attribute of the research base on development referring to the "grade (or strength) of recommendation", decided based on levels of evidence (sometimes called hierarchy of evidence) assigned to studies based on the methodological quality of their design, validity, and applicability to patient care.

Evidence from scientific evaluation is available to support the effectiveness of the MATech (excluding cost-effectiveness, outlined in section D2.1.3 and implementation outcomes, outlined in section D3.2).

Attribute of the research base on effectiveness referring to the "grade (or strength) of recommendation", decided based on levels of evidence (sometimes called hierarchy of evidence) assigned to studies based on the methodological quality of their design, validity, and applicability to patient care.

Attribute of the scientific evaluation of the MATech referring to whether the research has ethical approval, has considered and addressed any risks for the target population, complies with the current laws on research on humans and data privacy and safety, and has shared information about how it meets these requirements.

General QI referring to whether the MATech has been developed according to standards established in the development of health technologies.

All development activities undertaken with respect to MATech are clearly described, such as activities related to preparation, development and optimization of product components as well as the manufacturing, validation and distribution process.

The MATech was developed in an iterative design process in which designers involved the target users and their needs in each phase of the design process. The users' requirements, objectives, and feedback were taken into account during the development process.

Usability tests were performed and the results are available (e.g., described or available on a link) with a statement, how the findings influenced the MATech.

The provider's conflicts of interest are clearly described, if any, to ensure trust and transparency.

Information sources are periodically verified (proven to still be correct and accurate) and updated (new information added or design changed).

General QI referring to whether a MATech corresponds to criteria commonly used to assess the technical functioning of electronic components, if applicable.

The MATech works fast and accurately without bugs or errors.

The interactive components (e.g. alarm system) are secure and these characteristics are maintained even when the system grows.

The MATech shows efficiency even with a large volume of users / data.

Collected data are properly protected to prevent sensible data leakage.

1  
2 Encrypting takes a part of the data and translates it into a new form so that only  
3 people with access to the key can read it, in order to protect the confidentiality of  
4 digital data.

5 The MATEch has software installed for data protection against online theft and  
6 attacks, and regularly revised to fulfil the function of acting against malicious code or  
7 programs.

8 Data storage on MATEch devices is not connected to network to further ensure data  
9 safety against network attacks.

10 How much storage space is provided by the MATEch to contain data.

11 The MATEch has measures in place for protection against burglary, theft, vandalism  
12 and terrorism.

13 The developed MATEch conforms to the requirements in terms of technical, privacy  
14 and security requirements of health care systems.

15 The MATEch can be connected with several other devices.

16 Quality indicators that evaluate if the research on the MATEch has been performed  
17 according to standards established in measurement and intervention research.

18 The MATEch is developed based on theory, evidence, and/or theoretical frameworks.

19 The MATEch measurement components measure exactly what they propose to  
20 measure (the used measure represents the intended variable)

21 Type of validity referring to the extent to which a measure in the MATEch “covers” the  
22 construct of interest

23 Type of content validity referring to the extent to which a measurement method in the  
24 MATEch appears “on its face” to measure the construct of interest.

25 Type of content validity referring to whether the MATEch and corresponding materials  
26 were validated for the available languages.

27 Type of content validity referring to the whether the MATEch was tested and validated  
28 for the target population.

29 The MATEch intervention components have the potential to influence the  
30 behaviour determinants they target.

31 The use of behaviour change techniques in the intervention components of the  
32 MATEch is evidence based, i.e. there is scientific evidence that the chosen techniques  
33 are likely to be effective in influencing the chosen behaviour determinants.

34 The MATEch measurement components reproduce a measurement result consistently  
35 in time and space.

36 Type of measurement reliability referring to the consistency across items or indicators  
37 of the same construct

38 Type of measurement reliability referring to consistency across different researchers

39 Type of measurement reliability referring to the consistency over time

40 Quality indicators related to Health Technology Assessment (HTA) procedures and  
41 concepts that inform decision-making regarding implementation and use of health  
42 technologies.

43 an economic analysis has been performed to inform value-for-money judgements  
44 about the MATEch with information about costs, health-related outcomes and  
45 economic efficiency

46 CEE that examines the costs and health outcomes of one or more interventions, to  
47 estimate how much it costs to gain a unit of a health outcome, like a life year gained or  
48 a death prevented.

1  
2 Cost-effectiveness analysis where the control group is represented by a population  
3 receiving no intervention (treatment as usual)  
4 Cost-effectiveness analysis where the control group is represented by a  
5 population receiving other interventions.  
6 CEE in which the incremental cost of a technology from a particular point of view is  
7 compared to the incremental health improvement expressed in the unit of quality  
8 adjusted life years (QALYs)  
9  
10 CEE in which a wide range of costs and consequences (effects) of the technology is  
11 assessed and reported separately. It includes all types of effects, including health, non-  
12 health, negative and positive effects, both to patients and other parties (e.g.,  
13 caregivers).  
14 CEE consisting of a systematic process to sum the potential rewards expected from the  
15 technology and then subtract the total costs associated with that technology; some  
16 analysts also build models to assign a monetary value on intangible items.  
17  
18 CEE consisting of applying basic rules to determine what mix of labor and capital  
19 produces output at the lowest cost, i.e., what the most cost-effective method of  
20 delivering goods and services would be while maintaining a desired level of quality.  
21  
22  
23 CEE that estimates the financial consequences of adopting a new technology which is  
24 usually performed in addition to a cost-effectiveness analysis; it evaluates whether the  
25 high-value intervention is affordable.  
26  
27 Healthcare system or country where the economic evaluation has been performed  
28  
29 Specifies the regulatory status (authorization and reimbursement) of the technology.  
30 These information are country or system specific, thus the repository also needs to  
31 specify where these indicators apply.  
32 The stage in which the MATech is in the process of obtaining necessary authorisations  
33 and being considered for reimbursement by authorities in order to be adopted in  
34 routine practice in a health system or country.  
35 HTA CUR indicator specifying whether the technology is approved for clinical use by an  
36 appropriate local regulator via marketing authorisation and/or CE marking.  
37 Healthcare system or country where the technology has received authorization.  
38  
39 Name of the body which has issued the technology approval for clinical use in the  
40 respective country (eg., NICE)  
41 Diagnoses, clinical conditions or social conditions for which the MATech has been  
42 approved for clinical use  
43 HTA CUR indicator specifying whether the technology cost is fully or partially covered  
44 for the patient by a reimbursement authority (eg., NHS, insurance company)  
45 Healthcare system or country where the technology is reimbursed.  
46 Diagnoses, clinical conditions or social conditions for which the technology is  
47 reimbursed  
48  
49 Quality indicators that evaluate if the MATech meets users expectations and provides  
50 a pleasurable experience of interaction with the technology.  
51 The MATech is easy to use, and easy to learn or understand, as assessed in objective  
52 ways (as opposed to user-friendliness, which is subjective).  
53 The interface is not overly complex, but instead is straightforward, providing quick  
54 access to common features or commands.  
55 The interface is well-organized, making it easy to locate different tools and options.  
56  
57  
58 The interface makes sense to the average user, requires minimal explanation for use,  
59 and provides clear explanations for how to use it.  
60 The MATech is reliable and does not malfunction or crash.

1  
2 The level of satisfaction of the end user with the MATEch has been explored and found  
3 appropriate.

4 The manner in which the level of satisfaction from the patient with the MATEch was  
5 assessed, e.g. online or telephone survey about satisfaction made by research staff.  
6

7 The MATEch or some parts of it can be customized to the needs of the individual user.  
8

9 The MATEch gives the option to customize language to adapt to different users.

10 The MATEch has been evaluated as aesthetic (size, layout, graphic, font size etc.  
11 support the use of MATEch) in a research project or external review.  
12

13 The text included in the MATEch is written in a style easy to understand, i.e. readers  
14 are able to recognize (decode) the words as well as comprehend the meaning of the  
15 text.  
16  
17  
18  
19  
20  
21  
22  
23  
24  
25  
26  
27  
28  
29  
30  
31  
32  
33  
34  
35  
36  
37  
38  
39  
40  
41  
42  
43  
44  
45  
46  
47  
48  
49  
50  
51  
52  
53  
54  
55  
56  
57  
58  
59  
60

For peer review only

---

### DEVELOPMENT AND JUSTIFICATION

Quality indicators are standardized, evidence-based, and measurable items for monitoring and evaluating the quality of healthcare performance. With their statement about the structure, process, or outcomes of care, review criteria and standards can be developed to help operationalize quality indicators.

No classification or list of criteria could be identified in the literature that provides a formal description of quality indicators specific to medication adherence technologies. However, several related sets of criteria refer to ehealth applications in general -such as the Mobile Application Rating Scale (MARS)- or guide reporting of research on ehealth applications -such as the Consort-EHEALTH guideline. These checklists and guidelines include relevant concepts of technology quality but are neither comprehensive nor specific to medication adherence technologies. MATech represent an important type of health technology and therefore should adopt HTA procedures and concepts to inform decision-making regarding their implementation and use. Two HTA domains were considered relevant for MATech: (i) Cost and economic evaluation (ECO) informs value-for-money appraisal with information about costs, health-related outcomes and economic efficiency; (ii) Current use of technology (CUR), specifies the authorization and reimbursement status of the technology. The indicators in both domains are often country or system specific, thus the repository also needs to specify where these indicators apply. Other HTA domains include assessment elements that are either captured in other attribute groups or not applicable to MATech. Therefore, we decided to develop a checklist for assessing the quality of ehealth applications, building on the work of an ongoing project involving a systematic review of existing items and criteria in the literature. We synthesized the quality indicators identified in this work into a comprehensive list and adapted the items to be appropriate for medication adherence technologies for the ENABLE repository. This new list of items was discussed, adjusted, concretized, and refined in several rounds with SC members, and additional constructs were generated until consensus was reached.

As MATech follow different stages of development and implementation and need to meet quality standards specific or common to all stages, from research to adoption by decision-makers to routine use in specific settings, we decided to group quality indicators according to their relevance to these stages. We considered some indicators relevant to all stages, while others would be likely to be more research-related, policy-related, or use-related.

1  
2  
3  
4  
5  
6  
7  
8  
9  
10  
11  
12  
13  
14  
15  
16  
17  
18  
19  
20  
21  
22  
23  
24  
25  
26  
27  
28  
29  
30  
31  
32  
33  
34  
35  
36  
37  
38  
39  
40  
41  
42  
43  
44  
45  
46  
47  
48  
49  
50  
51  
52  
53  
54  
55  
56  
57  
58  
59  
60

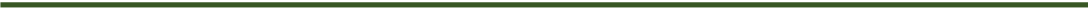

For peer review only



1  
2  
3  
4  
5  
6  
7  
8  
9  
10  
11  
12  
13  
14  
15  
16  
17  
18  
19  
20  
21  
22  
23  
24  
25  
26  
27  
28  
29  
30  
31  
32  
33  
34  
35  
36  
37  
38  
39  
40  
41  
42  
43  
44  
45  
46  
47  
48  
49  
50  
51  
52  
53  
54  
55  
56  
57  
58  
59  
60

For peer review only

1  
2  
3  
4  
5  
6  
7  
8  
9  
10  
11  
12  
13  
14  
15  
16  
17  
18  
19  
20  
21  
22  
23  
24  
25  
26  
27  
28  
29  
30  
31  
32  
33  
34  
35  
36  
37  
38  
39  
40  
41  
42  
43  
44  
45  
46  
47  
48  
49  
50  
51  
52  
53  
54  
55  
56  
57  
58  
59  
60

For peer review only

1  
2  
3  
4  
5  
6  
7  
8  
9  
10  
11  
12  
13  
14  
15  
16  
17  
18  
19  
20  
21  
22  
23  
24  
25  
26  
27  
28  
29  
30  
31  
32  
33  
34  
35  
36  
37  
38  
39  
40  
41  
42  
43  
44  
45  
46  
47  
48  
49  
50  
51  
52  
53  
54  
55  
56  
57  
58  
59  
60

For peer review only

1  
2  
3  
4  
5  
6  
7  
8  
9  
10  
11  
12  
13  
14  
15  
16  
17  
18  
19  
20  
21  
22  
23  
24  
25  
26  
27  
28  
29  
30  
31  
32  
33  
34  
35  
36  
37  
38  
39  
40  
41  
42  
43  
44  
45  
46  
47  
48  
49  
50  
51  
52  
53  
54  
55  
56  
57  
58  
59  
60

For peer review only

1  
2  
3  
4  
5  
6  
7  
8  
9  
10  
11  
12  
13  
14  
15  
16  
17  
18  
19  
20  
21  
22  
23  
24  
25  
26  
27  
28  
29  
30  
31  
32  
33  
34  
35  
36  
37  
38  
39  
40  
41  
42  
43  
44  
45  
46  
47  
48  
49  
50  
51  
52  
53  
54  
55  
56  
57  
58  
59  
60

For peer review only

1  
2  
3  
4  
5  
6  
7  
8  
9  
10  
11  
12  
13  
14  
15  
16  
17  
18  
19  
20  
21  
22  
23  
24  
25  
26  
27  
28  
29  
30  
31  
32  
33  
34  
35  
36  
37  
38  
39  
40  
41  
42  
43  
44  
45  
46  
47  
48  
49  
50  
51  
52  
53  
54  
55  
56  
57  
58  
59  
60

For peer review only

1  
2  
3  
4  
5  
6  
7  
8  
9  
10  
11  
12  
13  
14  
15  
16  
17  
18  
19  
20  
21  
22  
23  
24  
25  
26  
27  
28  
29  
30  
31  
32  
33  
34  
35  
36  
37  
38  
39  
40  
41  
42  
43  
44  
45  
46  
47  
48  
49  
50  
51  
52  
53  
54  
55  
56  
57  
58  
59  
60

For peer review only

1  
2  
3  
4  
5  
6  
7  
8  
9  
10  
11  
12  
13  
14  
15  
16  
17  
18  
19  
20  
21  
22  
23  
24  
25  
26  
27  
28  
29  
30  
31  
32  
33  
34  
35  
36  
37  
38  
39  
40  
41  
42  
43  
44  
45  
46  
47  
48  
49  
50  
51  
52  
53  
54  
55  
56  
57  
58  
59  
60

For peer review only



1  
2  
3  
4  
5  
6  
7  
8  
9  
10  
11  
12  
13  
14  
15  
16  
17  
18  
19  
20  
21  
22  
23  
24  
25  
26  
27  
28  
29  
30  
31  
32  
33  
34  
35  
36  
37  
38  
39  
40  
41  
42  
43  
44  
45  
46  
47  
48  
49  
50  
51  
52  
53  
54  
55  
56  
57  
58  
59  
60

For peer review only

| Upper Level             | Sub-Level 1           | Definition                                                                                                                                                                            |
|-------------------------|-----------------------|---------------------------------------------------------------------------------------------------------------------------------------------------------------------------------------|
| implementation outcome  |                       | characteristic of the technology regarding its implementability in clinical practice, as supported by evidence                                                                        |
|                         | Acceptability         | Implementation outcome referring to whether stakeholders reported satisfaction with various features of the technology and the experience of using it to support medication adherence |
|                         | Feasibility           | Implementation outcome referring to whether stakeholders perceived the technology as practical and fit for use in supporting medication adherence                                     |
| implementation strategy | Sustainability        | Implementation outcome referring to whether stakeholders perceived the technology as appropriate for routine sustained use in supporting medication adherence                         |
|                         |                       | characteristic of the technology that facilitate implementation and maintenance of the technology in a setting                                                                        |
|                         | training              | Implementation strategy referring to activities to teach stakeholders about the technology and how to use it and integrate in the medication adherence support processes              |
|                         | educational materials | Implementation strategy referring to materials stakeholders may consult to learn about the technology and how to use it and integrate in the medication adherence support processes   |
|                         | funding               | Implementation strategy referring to financial strategies and/or additional costs to facilitate adoption of the technology into medication adherence support practice                 |
|                         | expertise sharing     | Implementation strategy referring to information from previous implementations on what helped adopt the technology into medication adherence support practice                         |
|                         | technical assistance  | Implementation strategy referring to systems to support implementation of the technology into medication support practice                                                             |
|                         | consultation          | Implementation strategy referring to accessing direct support from experts for the implementation of the technology into medication support practice                                  |

1  
2  
3  
4  
5  
6  
7  
8  
9  
10  
11  
12  
13  
14  
15  
16  
17  
18  
19  
20  
21  
22  
23  
24  
25  
26  
27  
28  
29  
30  
31  
32  
33  
34  
35  
36  
37  
38  
39  
40  
41  
42  
43  
44  
45  
46

|                                 |                                                                                                                                                                                                      |
|---------------------------------|------------------------------------------------------------------------------------------------------------------------------------------------------------------------------------------------------|
| accreditation & legal approvals | Implementation strategy referring to credentials and/or licensing to acquire or prove to be able to use the technology in a setting in the conditions necessary for optimal safety and effectiveness |
| collaborations                  | Implementation strategy referring to involving multiple institutions in delivering the medication adherence support solution that uses the technology                                                |
| access to additional resources  | Implementation strategy referring to access to data, space, laboratory facilities                                                                                                                    |

For peer review only

## DEVELOPMENT AND JUSTIFICATION

Medication adherence support technologies (as medications themselves) work only if they are adopted by individual users or by a group of healthcare providers and users in a healthcare setting, if their use is maintained for the duration in which they are designed to be used to bring about the expected benefits, and if they are used as intended for this duration. Evidence in implementation sciences is accumulating in recent years on how to facilitate the adoption and use of technologies (or interventions) in real-world settings. This question needs to be addressed separately, as most interventions are developed in contexts not representative for real-world situations and many additional challenges occur, particularly when scaling-up such interventions within care delivery. To move from research/development settings into clinical care, researchers need to consider implementation challenges already from the technology development stage.

The field of implementation sciences is relatively new, and only recently efforts have been made to structure terminology and propose concepts to be used in a standardized way. To ascertain whether the implementation of an intervention has been successful, specific consideration needs to be given to implementation outcomes, i.e., “the effects of deliberate and purposive actions to implement new treatments, practices, and services”, which are intermediary to the service and client outcomes envisaged by an intervention. Among the 8 outcomes proposed in the taxonomy of Proctor et al (2011) following literature review and expert panel discussions, some refer primarily to the process of implementation and use (e.g. adoption, penetration, fidelity) and to the application of the technology in a specific setting (appropriateness, implementation cost), others can be construed as mostly referring to the technology itself across settings and were selected for the ENABLE repository. The Expert Recommendations for Implementing Change (ERIC) project has compiled a list of 73 implementation strategies, i.e., “methods or techniques used to enhance the adoption, implementation, and sustainability of a clinical program or practice”. This taxonomy, the result of a Delphi expert consensus process with input from numerous stakeholders, achieves a similar goal of aligning language and provides a comprehensive range of options from which implementers may choose strategies to boost the scaling-up of their innovation in a clinical setting. As for implementation outcomes, many of these strategies refer to the process of implementation itself and are highly dependent on the setting; thus, an implementation team may decide to start with assessing local needs, to conduct iterative tests of change, to create new clinical teams, to develop and implement tools for quality monitoring, etc. in response to barriers or facilitators identified during project planning. However, some implementation strategies are also dependent on the technology itself and can be addressed at least partly in the development and implementation of the technology across settings; we have therefore examined the ERIC compilation and selected strategies that could be technology-specific and addressed across settings. The conceptual structuring of this field is in constant evolution; however, these two classifications have already gained notoriety and are likely to be used by stakeholders to generate and use evidence on medication adherence technologies.

Following this preliminary work on the ENABLE repository, three implementation outcomes were selected and adapted from the taxonomy of implementation outcomes to target early-, mid-, and late-implementation phases. They refer to whether stakeholders are satisfied with the technology and using it (acceptability), whether they perceive it as practical and fit for use (feasibility) and appropriate for routine use on the long term (sustainability). Eight implementation strategies were selected and adapted from the ERIC compilation of implementation strategies, following the [interventienet.nl](http://www.interventienet.nl) format. Thus, the ENABLE repository will aim to collect information on whether there is any information available, any benefit/need, and any support already provided for the following topics: training stakeholders and users for working with the technology, accessing education materials about the technology, any financial strategies or additional costs applicable, any expertise to share from previous implementations, any consultation to access for support in implementation/use, any accreditation or legal approvals necessary, and whether the involvement of multiple institutions is needed for implementing the technology into clinical care.

1  
2  
3  
4  
5  
6  
7  
8  
9  
10  
11  
12  
13  
14  
15  
16  
17  
18  
19  
20  
21  
22  
23  
24  
25  
26  
27  
28  
29  
30  
31  
32  
33  
34  
35  
36  
37  
38  
39  
40  
41  
42  
43  
44  
45  
46

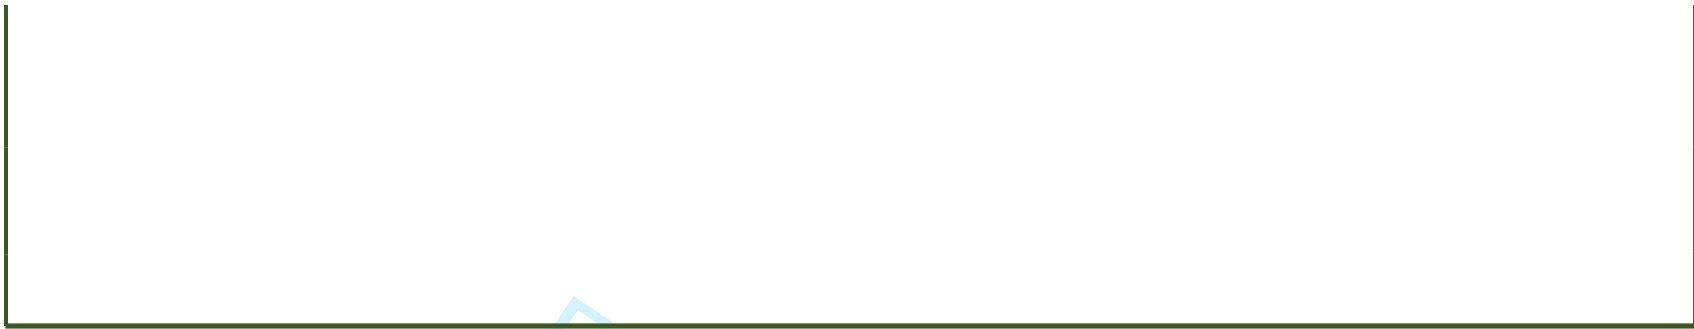

For peer review only

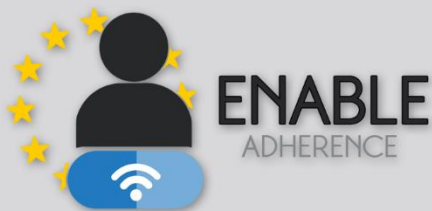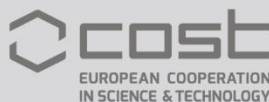

## ENABLE Repository Delphi survey - study information letter

### *What is this study about?*

Adherence to medication has been found to be suboptimal in numerous chronic conditions and to have a negative impact on chronic disease management, patient's general health status, quality of life and working abilities as well as health care costs and waste. Numerous technologies exist to support medication adherence, yet few are implemented into practice. An online interactive repository of available technologies may facilitate their selection and adoption by different stakeholders. Developing such repository is among the main tasks of the ENABLE COST Action (CA19132), within the remit of Working Group 2. To meet this challenge the ENABLE Action includes a large interdisciplinary network of experts in medication adherence from 39 European countries and has initiated several activities towards these goals. A definition of medication adherence technologies and a framework of attributes were developed. The framework was structured into three domains (product and provider information, medication adherence descriptors and evaluation and implementation) branching in attribute groups, which branch further into sublevels with related labels and definitions.

### *What to expect from study participation?*

The proposed definition and framework will be evaluated in a real-time online Delphi study by stakeholders from 39 countries with research, practice, policy, patient representation and technology development backgrounds. It is expected that you and other invited stakeholders evaluate the proposed the relevance, clarity and completeness of the definition and repository attributes. All participants have multiple opportunities to reconsider their evaluations based on aggregated feedback updated in real-time.

Participants are invited to rate the degree of relevance and clarity of the proposed definition of medication adherence technologies, and of each attribute group, by placing a dot on a 2D-grid; the position of the dot on the vertical axis indicates clarity (low to high = bottom to top), and its position on the horizontal axis indicates relevance (low to high = left to right). Participants are encouraged to provide their comments and suggestions (anonymously) on the comments section and engage with other participants' comments.

We will stop the survey when a predefined number of participants will respond, and when stability of responses will be reached. We will summarize the results descriptively and compare evaluations across stakeholder groups and countries. We will quantify agreement among stakeholders on proposed attribute groups using the IPRAS analysis technique from RAND/UCLA Appropriateness Method.

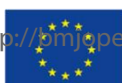

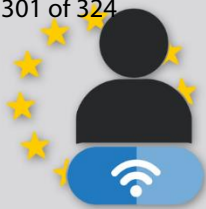

**ENABLE**  
ADHERENCE

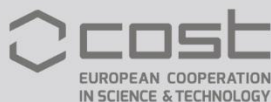

### ***How to participate?***

Firstly, by this email we extended our invitation to you and are asking for authorization to use your email within the scope of this study. If after considering this information you agree to participate, please access directly the link provided in the email sent from the eDelphi.org. You will be formally asked about your consent to participate when you will access the survey after a brief introduction, and the questions will appear only once you will consent to this study.

### ***How are data collected and stored?***

For this study it is necessary to collect some personal data. This includes your name and email address, as well as your age, gender, field of work/expertise, country, education level and the role of your participation with years of experience in it (researcher/academic; healthcare practitioner; policy/decision maker; patient representation; eHealth/IT specialist). Your name and email address are not linked to other data you provide by answering the survey. The personal data will not be visible to other respondents. The personal data used for conducting this study will be stored until the end of the COST Action ENABLE (October 2024) and then erased.

### ***Ethical and data protection approvals***

This study obtained ethics approval from Malaga Regional Research Ethics Committee in April 2021. In addition, the Delphi protocol was determined as compliant regarding data protection and security by Data Protection Officer from University of Basel.

For more information about your rights on data processing, and further questions about the project please contact the ENABLE-R Delphi at [wg2enablecost@gmail.com](mailto:wg2enablecost@gmail.com).

On behalf of the ENABLE WG2 Steering Committee,

Alex Dima and Urska Nabergoj Makovec

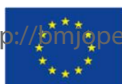

Welcome to the ENABLE-R real time Delphi survey!

**ENABLE** is a European Cooperation In Science and Technology (COST) project ("[CA19132 - European Network to Advance Best practices & technology on medication adherence](#)") that aims to raise awareness of medication adherence technologies and best practices, and to foster and extend multidisciplinary knowledge on medication adherence at patient, treatment and system levels. COST is supported by the EU Framework Programme Horizon 2020. ENABLE currently has members from 39 European countries.

**ENABLE-R** will be an online repository of medication adherence technologies (**ENABLE-R**), which will describe a wide range of technologies relevant for different potential users: patients, healthcare professionals, managers of healthcare organisations, policy makers, researchers. The aim is to develop a user-friendly repository, where users will be able to search technologies with specific attributes, that would fit their context and needs.

**This Delphi survey aims to explore the level of agreement with the proposed scope and structure of the repository.** A steering committee has been working since October 2020 to define medication adherence technologies and propose a repository structure that considers many aspects of such technologies and their use in different settings. To ensure that the scope and structure is in line with stakeholders' needs and expectations, we created this Delphi survey to consult with stakeholders across Europe on several key elements of the proposed scope and structure. The study obtained ethical approval and positive data protection assessment. Please consult the survey information letter or contact us at [wg2costenable@gmail.com](mailto:wg2costenable@gmail.com) if you have any questions.

*You were recognized as a stakeholder in the area of medication adherence and are invited to participate in this Delphi survey. Thank you for taking time to complete this survey. We value your contribution.*

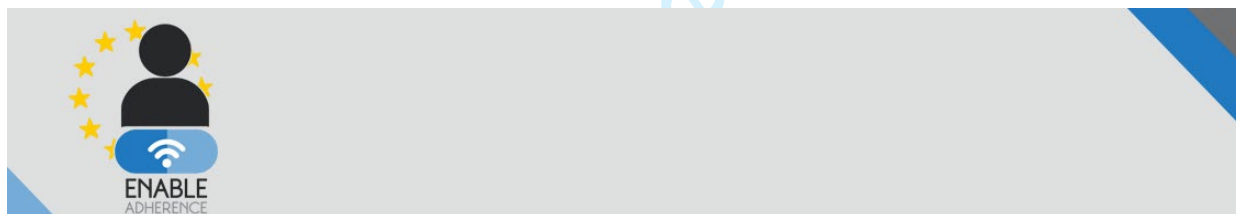



## Instruction for the Delphi survey

### The content and structure of the survey

The survey includes **23 questions** related to repository structure, each presented on a separate page. Before starting the survey, we request some **basic information** about you and your experience in medication adherence.

- We present the proposed **definition of the medication adherence technologies (MATech)** for your consideration.
- We invite you to take some time **to explore the full framework of attributes**. It consists of **three domains** (D1. Product & provider information; D2. Medication adherence descriptors; D3. Evaluation & implementation) with underlying attribute groups. Each attribute group branches further in sublevels with related labels and definitions and is labeled with domain number and consecutive number according to the level it represents (e.g. D2.1 or D2.1.1). The complete framework is presented in an interactive graph and in a Excel document detailing proposed structure, labels, definitions and justifications; you may open these documents in separate windows so that you can consult them throughout the survey. After familiarizing yourself with the framework, we ask you to **provide general comments about any missing attributes** relevant for a future MATech repository.
- We describe each domain on one page and present each attribute group and respective sublevels for your consideration on separate pages and ask you to rate **their overall relevance and clarity** and provide **comments or suggestions for improvement** of attribute labels or definitions, and any specific thoughts about any missing attributes in this particular group.

---

### The real time Delphi approach

This survey uses a **real-time approach**, which means that, once you answer a question, you will immediately see other's responses and comments and aggregated feedback on your screen. The strength of the Delphi approach lies in participants having the opportunity to revisit their answers based on other's answers and comments. Hence, it is very important that you **visit the survey two or more times during the study period and reconsider your answers based on the aggregated results and discussions in the comments section**. You are also encouraged to engage in the discussion by explaining the reasons for your responses and making suggestions for improvement. These will also appear in real-time and allow (anonymous) exchanges among stakeholders.

We will regularly check the platform, send updates on the study progress and reminders to (re)visit the survey.

---

### Completing the survey

It should take you **45 to 60 minutes** to complete the survey the first time, and approximately **30 to 60 minutes** for revisiting your answers at a later moment (depending on the level of engagement in discussions you prefer).

You can **navigate across pages** in the survey by clicking on the **blue arrow above the page number**. An index window opens and you can choose which questions you would like to answer. For the first

1  
2  
3 visit to the survey, we recommend following the order provided. You can **log in and out of the survey**  
4 and upon return continue answering where you stopped the last time.  
5  
6

---

## 7 8 **Format of the questions** 9

10 For each attribute, an **interactive 2D grid with two axes** (*see below*) will appear:

- 11 • the **horizontal (X) axis** represents **RELEVANCE** of the proposed attribute group for the  
12 repository structure on a scale from **1-9 (left-right)**, where 1 indicates extremely not relevant  
13 (*far left*) and 9 indicates extremely relevant (*far right*). By relevance, we mean **the extent to**  
14 **which these attributes are important in order to make informed choices regarding their**  
15 **adoption and use.**
- 16 • **the vertical (Y) axis** represents **CLARITY** of the attribute group labels and definitions on a scale  
17 from **1-9 (bottom-top)**, where 1 indicates extremely not clear (*bottom*) and 9 indicates  
18 extremely clear (*top*). By clarity, we mean **the extent to which the labels and definitions of**  
19 **these attributes are easy to understand and apply by repository users.**
- 20 • after deciding on your rating on both axes, you can mark your answer in the grid and a **blinking**  
21 **dot** will appear representing both your ratings. **One dot for two ratings: left-right RELEVANCE,**  
22 **bottom-up CLARITY.**
- 23 • the scale is continuous, which means you can click anywhere in the grid and thus rate using  
24 decimal values (e.g. 4.7)
- 25 • after providing your answer, you will be able **to see other participants' ratings represented**  
26 **as dots on the same grid**, and aggregated feedback on the right side of the 2D grid.
- 27 • You can change your ratings any time during the study period, by **moving the blinking dot on**  
28 **the grid**. Moreover, you are **encouraged to revisit your answers** on multiple occasions in light  
29 of other participants' answers.

30 Each attribute page also contains a **comments section**. Below the 2D grid you can find open text fields  
31 to provide comments or suggestions on the attribute and related sublevels. All comments are  
32 displayed anonymously. Please provide your comments in the relevant pre-defined category:

- 33 • revisions of attribute labels and definitions
- 34 • missing attributes in this group

35  
36  
37 There you can also see other participants' comments and suggestions and respond to them. Please  
38 remember to **save your comments** before leaving a page so that they can be recorded and displayed.  
39  
40  
41  
42  
43  
44  
45  
46  
47  
48  
49  
50  
51  
52  
53  
54  
55  
56  
57  
58  
59  
60

1  
2  
3  
4  
5  
6  
7  
8  
9  
10  
11  
12  
13  
14  
15  
16  
17  
18  
19  
20  
21  
22  
23  
24  
25  
26  
27  
28  
29  
30  
31  
32  
33  
34  
35  
36  
37  
38  
39  
40  
41  
42  
43  
44  
45  
46  
47  
48  
49  
50  
51  
52  
53  
54  
55  
56  
57  
58  
59  
60

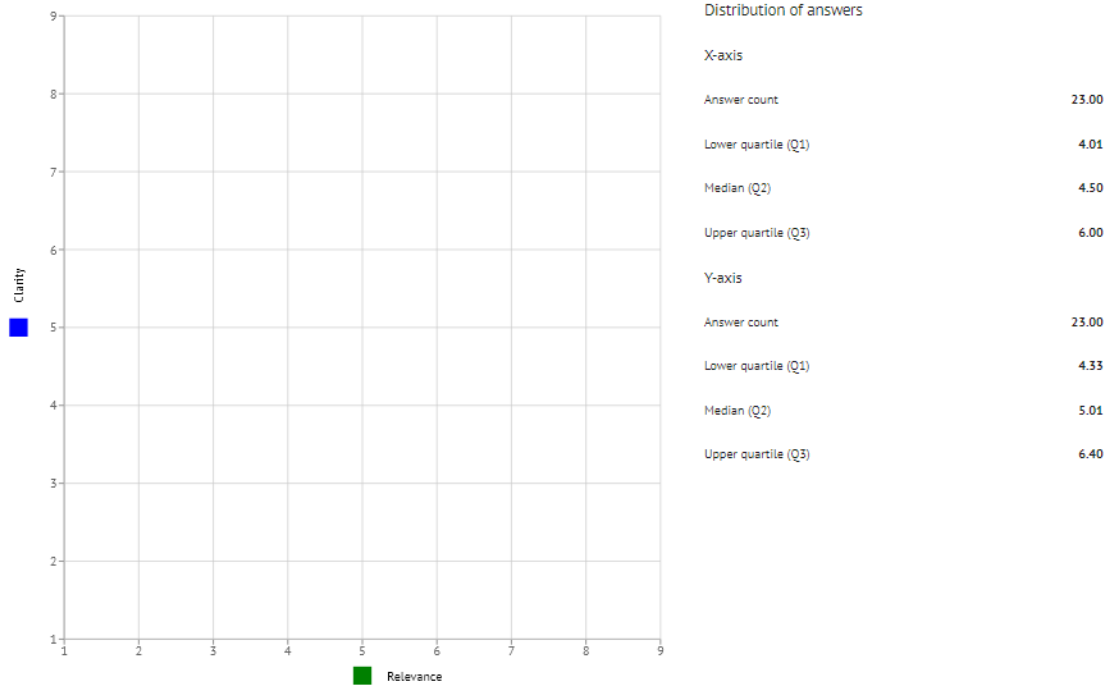

Revisions of attribute labels and definitions | Missing attributes in this group

### REVISIONS OF ATTRIBUTE LABELS AND DEFINITIONS

### COMMENTS

Select the amount of shown comments:  Newest first  Oldest first

ew only

## Summary of the Delphi survey

### Welcome

### Instructions for the Delphi survey (2 pages)

### Agreement with the GDPR statement

### Demographic information (gender, age, country, education, professional field)

### Through which perspective are you answering today?

|                               | Research/education professional | Healthcare practitioner | Policy/decision makers | Patient perspective | eHealth/ IT specialist |
|-------------------------------|---------------------------------|-------------------------|------------------------|---------------------|------------------------|
| Less than 5 years experience  |                                 |                         |                        |                     |                        |
| 10 to <15 years experience    |                                 |                         |                        |                     |                        |
| 15 to <20 years experience    |                                 |                         |                        |                     |                        |
| 20 to <30 years experience    |                                 |                         |                        |                     |                        |
| More than 30 years experience |                                 |                         |                        |                     |                        |

## What is a "medication adherence technology"?

*For the purpose of this repository, we propose the following definition: "Medication Adherence Technologies (MATech) are devices, procedures or systems developed based on evidence to support patients to take their medications as agreed with the healthcare providers (i.e. to initiate, implement, and persist with the medication regimen)."*

**1) Please rate your level of agreement with the proposed MATech definition (X axis).**

**2) Please rate the CLARITY of the MATech definition (Y axis).**

Detailed explanation of the definition and repository scope:

- **devices, procedures or systems** emphasize the inclusion of all technologies, irrespective of their mode of delivery (whether based on electronic or printed supports, delivered through human interaction, or a combination of these) with the aim to construct a comprehensive repository in which users can identify diverse technologies to fit their potentially diverse needs.
- **developed based on evidence** encompass the requirement of evidence/research that supports at least a potential contribution to either measurement or intervention on medication adherence (e.g., validation study on measurement of medication adherence, or pilot study with medication adherence among outcomes). Thus, technologies that are not (yet) supported by evidence (e.g., are in earlier stages of development and testing), or clinical practice protocols without an evidence base on at least one aspect (safety, efficacy, effectiveness, cost-effectiveness, appropriateness, social and ethical values or quality), will not be (yet) included in the repository until such evidence is produced and reported.
- **support patients to take their medications as agreed with the healthcare providers (i.e., to initiate, implement, and persist with the medication regimen)** encompass the contribution of the technology to medication adherence management – either directly in patients' self-management, or by supporting professionals to offer such services to patients through all phases of medication adherence. Thus, technologies that focus on other medication management goals, but do not target adherence specifically would be out of scope for this repository.

*The MATech definition and scope of the repository is based on the WHO definition of health technologies, the WHO publication "Adherence to long-term therapies: evidence for action", the ABC taxonomy and the European Commission definition of best practice.*

### D1.1 Product and provider information

The product and provider domain entails basic information about the product and provider organization as well as the description of the repository entry and source of information.

1) Please rate the **RELEVANCE** of this attribute group (X axis).

2) Please rate the **CLARITY** of this attribute group (Y axis).

#### Further explanation:

Domain 1 consists of one attribute group and includes the attributes for the description of basic product and manufacturer/developer information, as follows:

1. **Product** is a device, procedure or system, that could be used to manage adherence to medication described by its name, brand, type, release date, ...
2. **Provider organization** is the organization that produces and/or makes the product available for users described by its name, type, domain activity, contact details...
3. **Repository entry** is a description of a health technology by a repository author account (ID, date of entry, update, verification).
4. **Author of the product description** is a person or group of persons who enters information about at least one MATEch in the ENABLE-R database (ID, name, date, contact details).

*The definitions of domain 1 are based on the ITEMAS ontology. For a more detailed view of the respective sub-levels with labels and definitions please check the interactive graph or the Excel file under supporting information.*

## Table of contents for Domain 2 – medication adherence descriptors

### D2.1 Target use scenario

Target use scenario is the type of common adherence management activities that the technology is intended to be used for (i.e., for self-management of adherence or support service use).

1. Please rate the **RELEVANCE** of this attribute group (X axis).
2. Please rate the **CLARITY** of this attribute group (Y axis).

#### Further explanation:

Target use scenario entails:

1. **Adherence self-management** is the scenario in which the technology is used for adherence self-management activities and can be further defined by:
  - Person in the healthcare environment (*patient or caregiver*)
  - Patient age group (*adult, adolescent, child, infant*)
  - Patient functional status (*mental functions, sensory functions, movement-related functions*)
  - Patient literacy (health literacy, including medication literacy)
  - Patient polypharmacy
  - Patient multimorbidity
2. **Adherence support use** is the scenario in which the technology is used for activities supporting taking medication in a health/social care provision setting and can be further specified by the following user types:
  - Professional health and social care provider
  - Health (system) manager

*The definitions of target use scenarios are based on several taxonomies -SNOMED-CT, and WHO International Classification of Functioning, Disability and Health (ICF), and Digital Health Interventions (DHI)- and research literature sources. For a more detailed view of the respective sub-levels with labels and definitions please check the interactive graph or the Excel file under supporting information.*

### D2.2 Target health conditions

Target health conditions are the type of diseases or health problems the technology is intended for.

1. Please rate the **RELEVANCE** of this attribute group (X axis).
2. Please rate the **CLARITY** of this attribute group (Y axis).

#### Further explanation:

Target health conditions entail:

1. Blood
2. Cancer and neoplasms
3. Cardiovascular
4. Congenital disorder
5. Ear
6. Eye
7. Infection

8. Inflammatory and immune system
9. Injuries and accidents
10. Mental health
11. Metabolic and endocrine
12. Musculoskeletal
13. Neurological
14. Oral and gastrointestinal
15. Renal and urogenital
16. Reproductive health and childbirth
17. Respiratory
18. Skin
19. Stroke
20. Generic health relevance

*The definitions of target health conditions are based on The International Classification of Disease (ICD-11) and The Health Research Classification System (HRCS) from the UK clinical research association. For a more detailed view of the respective sub-levels with labels and definitions please check the interactive graph or the Excel file under supporting information.*

### D2.3. Medication regimen

**Medication regimen attributes are the prescribed schematic form/therapeutic plan of medication therapy that the technology is intended for.**

1. Please rate the **RELEVANCE** of this attribute group (X axis).
2. Please rate the **CLARITY** of this attribute group (Y axis).

#### Further explanation:

Medication regimen attributes entail:

1. **Type of intention** as the purpose for which the medication is prescribed (*e.g., preventive or therapeutic*).
2. **Duration of treatment** presents the intended interval of treatment and relates to the clinical course and disease conditions (*e.g., short or long-term*).
3. **Route of administration** is the route in which medications/doses are administered to unfold pharmacological effects (*e.g., oral, inhaled, injections/subcutaneous, infusion/parenteral, patches, topical*).
4. **Number of monitored medications** defines how many distinct medications are monitored by the technology, if applicable (*e.g., single medication, multiple medication*).
5. **Prescribed dosing frequency** defines the dose-taking patterns recommended for medicines administration, in which doses should be taken at defined time intervals over a defined time period (*e.g., once-daily, multiple daily dosing at fixed intervals, once per week dosing, multiple dosing per week in fixed intervals, dose adjustment recommendations*).

*The definitions of medication regimen attributes are based on several taxonomies: SNOMED-CT; National Cancer Institute Thesaurus (NCIT) and Medical Subject Headings (MeSH). For a more detailed view of the respective sub-levels with labels and definitions please check the interactive graph or the Excel file under supporting information.*

#### D2.4.1. Phase of medication adherence

**A medication adherence phase is a time interval between the prescription start and end dates that is behaviourally (i.e., linked with specific determinants and outcomes) and metrically (i.e., requires specific estimation methods) distinct.**



1. Please rate the **RELEVANCE** of this attribute group (X axis).
2. Please rate the **CLARITY** of this attribute group (Y axis).

#### Further explanation

Medication adherence phases include

1. **Initiation** is the phase of adherence that covers the start of a prescribed treatment, i.e., the period from when the prescription is issued to the first dose taken (i.e., the initiation event)
2. **Implementation** is the phase of adherence from the initiation until the last dose taken during which one can estimate the extent to which the patient's dose taking and timing are linked to the prescribed dosing regimen.
3. **Discontinuation (Persistence)** is the phase of adherence that refers to the end of treatment execution and covers the period until last dose is taken, e.g. end of therapy or termination by patient. Persistence is the period between initiation and discontinuation.

*The definitions of adherence management are based on the ABC Taxonomy. For a more detailed view of the respective sub-levels with labels and definitions please check the interactive graph or the Excel file under supporting information.*

#### D2.4.2.A Monitoring/measurement type of management

**Medication adherence monitoring, or measurement, is type of adherence management that refers to estimating (repeatedly) medication adherence behaviours, determinants, and/or outcomes.**

1. Please rate the **RELEVANCE** of this attribute group (X axis).
2. Please rate the **CLARITY** of this attribute group (Y axis).

#### Further explanation

Medication adherence monitoring/measurement entails:

1. **Measurement method** is a way in which information is gathered and summarized by the technology about the patient's medication adherence. It is further specified into the following:
  - **Direct observation method** is a measurement method consisting in observing medication intake directly.
  - **Pill count method** is a measurement method consisting in calculating left over pills in containers/blisters at a specific time point.
  - **Self-report method** is a measurement method using data reported by patients or caregivers about themselves (*e.g., diary, questionnaire, interview/consultation*).
  - **Electronic monitoring method** is a measurement method using data from devices that record medication taking events electronically (*e.g., smart packages, smart pill, digital event record system*).
  - **Electronic healthcare database method** is a measurement method using routinely collected data as part of a longitudinal healthcare process (*e.g., electronic medical records, claims/dispensing, record linkage system*).
  - **Laboratory method** is a measurement method based on clinical assessment through invasive procedure (*e.g., measuring drug concentration, biomarker or treatment response in samples from body fluids*).
2. **Measurement target** is a component of the adherence causal (logic) model measured by the technology. It is further defined by:
  - **Determinant measure** is measurement targeting causal influences on the behaviour that can be modifiable (amenable to intervention with a medication adherence technology).

- **Behaviour measure** is measurement targeting a self-management behaviour (e.g., adherence, diet, physical activity, tobacco use, symptom monitoring and management).
- **Outcome measure** is the measurement targeting the effects of the behaviour or change of behaviour on the patient's status (e.g., health outcome, quality of life).

The definition of adherence monitoring/measurement is based on the ABC Taxonomy. The definitions of measurement methods and targets are based on several taxonomies -SNOMED-CT, the Train4Health (T4H) behaviour change competency framework and the behaviour change intervention ontology (BCIO)-, as well as scientific literature and the methodological expertise of the repository Steering Committee. For a more detailed view of the respective sub-levels with labels and definitions please check the interactive graph or the Excel file under supporting information.

#### D2.4.2.B Support/intervention type of management

**Medication adherence support and/or intervention is a type of adherence management that refers to generating change in medication adherence determinants and thus behaviours and outcomes.**

1. Please rate the **RELEVANCE** of this attribute (X axis).
2. Please rate the **CLARITY** of this attribute (Y axis).

Attribute groups further describing medication adherence support/intervention type of management are presented for your review in the next pages.

The definitions of adherence management types are based on the ABC Taxonomy.

##### D2.4.2.B.1 Intervention modes of delivery

**Intervention modes of delivery are the ways used to deliver a medication adherence intervention.**

1. Please rate the **RELEVANCE** of this attribute group (X axis).
2. Please rate the **CLARITY** of this attribute group (Y axis).

##### Further explanation

Intervention modes of delivery entails:

1. **Printed material** is the mode of delivery involving use of printed material (e.g., brochure or printed media such as poster, newspaper/leaflet)
2. **Human interaction** is the mode of delivery involving a person as intervention source who interacts with an intervention recipient (e.g., face to face consultations or network/patient groups)
3. **Electronic mode** is the mode involving electronic technology in the presentation of information or the mode of motivation to an intervention recipient (e.g., smartphone/tablet, wearable electronic device like smart box, smart inhaler, smart tube, smart button or digital media like internet, social media, broadcast media, billboard).

The definitions of intervention modes of delivery are based on the Behaviour Change Intervention Ontology (BCIO), specifically a taxonomy of mode of delivery of behaviour change interventions (BCI). For a more detailed view of the respective sub-levels with labels and definitions please check the interactive graph or the Excel file under supporting information.

### D2.4.2.B.2 Target behaviour determinants

Target behaviour determinants are causal influences on medication adherence that can be modifiable (amenable to intervention with a medication adherence technology).

1. Please rate the **RELEVANCE** of this attribute group (X axis).
2. Please rate the **CLARITY** of this attribute group (Y axis).

#### Further explanation

Target behaviour determinants entails:

1. **Capability** is a group of determinants referring to what an individual can do themselves to take medication as agreed with the healthcare provider (e.g., *psychological/cognitive capability or physical capability/skills*)
2. **Opportunity** is a group of determinants referring to the conditions in the individual's external environment that can facilitate medication adherence (e.g., *social opportunity/influences or physical opportunity/environmental context and resources*)
3. **Motivation** is a group of determinants referring to what extent the individual feels driven/willing/energized to take medication as agreed with the healthcare provider (e.g., *reflective motivation or automatic motivation*)

*The definitions of target behaviour determinants are based on the Capability, Opportunity, Motivation and Behaviour (COM-B) model, the Theoretical Domains Framework (TDF) and the Behaviour Change Intervention Ontology (BCIO), specifically The Mechanisms of Action (MoA) Ontology currently in development. For a more detailed view of the respective sub-levels with labels and definitions please check the interactive graph or the Excel file under supporting information.*

### D2.4.2.B.3 Behaviour change techniques

Behaviour change techniques (BCTs) are options/activities included in the technology that aim to influence determinants (barriers and facilitators) of medication adherence behaviours.

1. Please rate the **RELEVANCE** of this attribute group (X axis).
2. Please rate the **CLARITY** of this attribute group (Y axis).

#### Further explanation

BCTs entails:

1. **BCTs acting on capability:**
  - **feedback and monitoring** means the technology includes options to record medication intake and its effects and feed this info back to the user (e.g., *biofeedback, feedback or self-monitoring on behaviour, feedback or self-monitoring on outcomes*).
  - **repetition and substitution** means the technology includes options/activities to perform certain actions repeatedly and systematically in order to enforce medication adherence behaviours and replace other behaviours not beneficial for medication adherence (e.g., *habit formation, behavioural practice, graded tasks*).
  - **shaping knowledge** means the technology includes options for the user to learn about how to take medication as agreed with the healthcare provider, what they can do themselves to stick to the schedule in difficult situations, and test different ways of doing this.

1  
2  
3  
4  
5  
6  
7  
8  
9  
10  
11  
12  
13  
14  
15  
16  
17  
18  
19  
20  
21  
22  
23  
24  
25  
26  
27  
28  
29  
30  
31  
32  
33  
34  
35  
36  
37  
38  
39  
40  
41  
42  
43  
44  
45  
46  
47  
48  
49  
50  
51  
52  
53  
54  
55  
56  
57  
58  
59  
60

## 2. BCTs acting on opportunity:

- **demonstration of behaviour** means the technology includes an observable sample of how to take medication as agreed with the healthcare provider, directly in person or indirectly (video, pictures, drawings).
- **prompts & cues** means the technology includes ways to prompt medication intake at the agreed time. restructuring the physical environment & adding objects means the technology includes advice on how to change the environment to make it easier to take medication as agreed with the healthcare provider.
- **identity** means the technology includes ways of strengthening a positive identity that includes taking medications agreed with the healthcare provider.

## 3. BCTs acting on motivation:

- **goals and planning** means the technology includes options to encourage setting goals related to adherence and planning to achieve them (*e.g., action planning, discrepancy between behaviour and goals, goals setting and reviewing, problem solving*).
- **pros & cons** means the technology includes ways to identify and compare reasons for wanting or not wanting to take medication as agreed with the healthcare provider.
- **regulation** means the technology includes advice and/or options/activities aiming to keep motivation for medication adherence within a range favourable for performing adherence-related behaviours (*e.g., conserving mental resources, reducing negative emotions*).
- **self-belief means** the technology includes ways of increasing the person's confidence they can take medication as agreed with the healthcare provider.
- **imaginary reward** means the technology includes advice on how to imagine correct performance of medication intake.

## 4. BCTs acting across all three determinant groups:

- **social support** means the technology includes options to advise, arrange or provide social support (practical, emotional, other), or praise/reward taking medication as agreed with the healthcare provider. social reward means the technology includes verbal/non-verbal rewards when the patient shows effort and/or progress in taking medication as agreed with the healthcare provider.
- **information about consequences** means the technology includes information about consequences (health-related, emotional, social, environmental) of medication adherence (or non-adherence) and emphasize their relevance for the person.

*The definitions of behaviour change techniques are based on the Capability, Opportunity, Motivation and Behaviour (COM-B) model, the Theoretical Domains Framework (TDF), the Behaviour Change Techniques (BCT) taxonomy v1, and the Behaviour Change Intervention Ontology (BCIO). For a more detailed view of the respective sub-levels with labels and definitions please check the interactive graph or the Excel file under supporting information.*

#### D2.4.2.B.4 Intervention provider

Intervention provider is a role played by a person who uses the technology to assist the patient in their self-management of medication adherence.

1. Please rate the **RELEVANCE** of this attribute group (X axis).
2. Please rate the **CLARITY** of this attribute group (Y axis).

##### Further explanation

Intervention provider entails:

1. **Health care professional** is an intervention provider that applies scientific knowledge in medicine, nursing, midwifery, pharmacy, dentistry and/or health promotion to support patients in managing their health (e.g., *medical doctor, nursing professional, pharmacist, dentist, associated health professional*).
2. **Psychosocial care professional** is an intervention provider that applies scientific knowledge in psychology, sociology and other social sciences to support individual and families in a community in their well-being and life goals (e.g., *psychologist*).
3. **Personal care worker** is an intervention provider that delivers care, supervision and assistance for children, patients and elderly, convalescent or disabled persons in institutional and residential settings.
4. **Personal provider** is an intervention provider that is related to the person to whom the intervention is targeted through aspects of their personal lives (e.g., *family member, carer, friend, peer*).

*The definitions of the intervention provider attributes are based on several taxonomies: BCIO, in particular the Intervention Source Ontology, and Gender, Sex and Sexual Orientation Ontology (GSSO). For a more detailed view of the respective sub-levels with labels and definitions please check the interactive graph or the Excel file under supporting information.*

#### D2.4.2.B.5 Intervention setting

Intervention setting is the social and physical environment in which the technology is or can be used to manage medication adherence.

1. Please rate the **RELEVANCE** of this attribute group (X axis).
2. Please rate the **CLARITY** of this attribute group (Y axis).

##### Further explanation

Intervention setting entails:

**Physical setting** is an intervention setting that consists in a physical environment where the medication adherence technology is used (e.g., *residential facility, healthcare facility, educational facility, community facility*).

**Virtual setting** is an intervention setting that consists in a virtual environment where the medication adherence technology is used (e.g., *telemedicine, telepharmacy*).

An intervention can be applied or applicable to one type of settings, or to both.

*The definitions of the intervention setting attributes group are based on the BCIO, in particular the Intervention Setting Ontology. For a more detailed view of the respective sub-levels with labels and definitions please check the interactive graph or the Excel file under supporting information.*

## Table of contents for Domain 3 – evaluation and implementation

### D3.1.1.A ISO certification

ISO certification is a general quality indicator referring to whether the MATEch has obtained one or more ISO certification labels relevant for its content and purpose.

1. Please rate the **RELEVANCE** of this attribute (X axis).
2. Please rate the **CLARITY** of this attribute (Y axis).

*The definitions of quality indicators are based on a checklist of e-health quality criteria (under development), Mobile Application Rating Scale (MARS), and the Consort-EHEALTH guideline.*

### D3.1.1.B Evidence from scientific evaluation

Evidence from scientific evaluation is a group of general quality indicators referring to whether the evaluation of MATEch has been performed through the systematic, rigorous, and meticulous application of scientific methods, and the evidence obtained.

1. Please rate the **RELEVANCE** of this attribute group (X axis).
2. Please rate the **CLARITY** of this attribute group (Y axis).

#### Further explanation

The evidence from scientific evaluation entails:

1. **Research on development** means evidence from scientific evaluation is available to support the design of the MATEch. This also encompasses the classification of quality of the presented evidence.
2. **Research on effectiveness** means evidence from scientific evaluation is available to support the effectiveness of the MATEch (excluding cost-effectiveness, outlined in section D2.1.3 and implementation outcomes, outlined in section D3.2). This also encompasses the classification of quality of the presented evidence.
3. **Ethical and legal aspects** means the MATEch research has ethical approval, has considered and addressed any risks for the target population, complies with the current laws on research on humans and data privacy and safety, and has shared information about how it meets these requirements.

*The definitions of quality indicators are based on a checklist of e-health quality criteria (under development), the Mobile Application Rating Scale (MARS), and the Consort-EHEALTH guidelines. For a more detailed view of the respective sub-levels with labels and definitions please check the interactive graph or the Excel file under supporting information.*

### D3.1.1.C Development standards

Development standards are a group of general quality indicators referring to whether the MATEch has been developed according to standards established in the development of health technologies.

1. Please rate the **RELEVANCE** of this attribute group (X axis).
2. Please rate the **CLARITY** of this attribute group (Y axis).

### Further explanation

The development standards entail:

1. **Development process** means all development activities undertaken with respect to MATEch are clearly described, such as activities related to preparation, development and optimization of product components as well as the manufacturing, validation and distribution process of the MATEch.
2. **User-centred design process** means the MATEch was developed in an iterative design process in which designers involved the target users and their needs in each phase of the design process. The users' requirements, objectives, and feedback were taken into account during the development process.
3. **Conflict of interest** means the provider's conflict of interests are clearly described to assure trust and transparency.
4. **Updates of information sources** means information sources are periodically verified (proven to still be correct and accurate) and updated (new information added or design changed).

*The definitions of quality indicators are based on a checklist of e-health quality criteria (under development), Mobile Application Rating Scale (MARS), Consort-EHEALTH guideline. For a more detailed view of the respective sub-levels with labels and definitions please check the interactive graph or the Excel file under supporting information.*

#### D3.1.1.D Technological standards

**Technological standards are a group of general quality indicators referring to whether a MATEch corresponds to criteria commonly used to assess the technical functioning of electronic/digital components, if applicable.**

1. **Please rate the RELEVANCE of this attribute group (X axis).**
2. **Please rate the CLARITY of this attribute group (Y axis).**

### Further explanation

The technological standards entail:

1. **Performance** - the MATEch works fast and accurately without bugs or errors (*e.g., reliability of the interactive components, design scalability*).
2. **Data protection** - collected data is properly protected to prevent sensible data leakage (*e.g., data encryptions, antivirus supported maintenance, data storage place and capacity and protection against theft or physical attacks*).
3. **System integration** - evidence of MATEch meeting the technical, privacy and security requirements of health care systems.
4. **Inter-devices portability** - the MATEch can be connected with several devices.

*The definitions of quality indicators are based on a checklist of e-health quality criteria (under development), Mobile Application Rating Scale (MARS), Consort-EHEALTH guideline. For a more detailed view of the respective sub-levels with labels and definitions please check the interactive graph or the Excel file under supporting information.*

#### D3.1.2 Research-related quality indicators

**Quality indicators that evaluate if the research on the MATEch has been performed according to standards established in measurement and intervention research.**

1. **Please rate the RELEVANCE of this attribute group (X axis).**
2. **Please rate the CLARITY of this attribute group (Y axis).**



### Further explanation

The research-related quality indicators entail:

1. **Theory base** means the MATech is developed based on theory, evidence, theoretical framework.
2. **Validity of measurement** means the MATech is valid for certain conditions, populations, etc. (content validity)
3. **Validity of intervention** means the use of BCTs in the MATech is evidence based, i.e., there is scientific evidence that the chosen BCTs are likely to be effective in influencing the chosen behaviour determinants.
4. **Reliability of measurement** means the MATech shows a high test-retest reliability, internal consistency, and inter-rater reliability.

*The definitions of quality indicators are based on a checklist of e-health quality criteria (under development), Mobile Application Rating Scale (MARS), Consort-EHEALTH guideline. For a more detailed view of the respective sub-levels with labels and definitions please check the interactive graph or the Excel file under supporting information.*

### D3.1.3 Policy-related quality indicators

**Quality indicators related to Health Technology Assessment (HTA) procedures and concepts that inform decision-making regarding implementation and use of health technologies.**

1. Please rate the **RELEVANCE** of this attribute group (X axis).
2. Please rate the **CLARITY** of this attribute group (Y axis).

### Further explanation

The policy-related quality indicators entail:

1. **Economic and cost evaluation (ECO)** means an economic analysis has been performed to inform value-for-money judgements about the MATech with information about costs, health-related outcomes and economic efficiency. It entails several types of analysis (e.g., cost-effectiveness, cost-utility, cost-benefit, budget impact), which can be country or system specific, thus the repository also needs to specify where these indicators apply.
2. **Current use of technology (CUR)** specifies the regulatory status (authorization and reimbursement) of the technology. These information are country or system specific, thus the repository also needs to specify where these indicators apply.

*The definitions of policy-related quality indicators are based on Health Technology Assessment (HTA) Core Model, version 3.0 and O'Rourke et al. (2020). "The new definition of health technology assessment". For a more detailed view of the respective sub-levels with labels and definitions please check the interactive graph or the Excel file under supporting information.*

### D3.1.4 Use-related quality indicators

**Quality indicators that evaluate if the MATech use meets users' expectations and provides a pleasurable experience of interaction with the technology.**

1. Please rate the **RELEVANCE** of this attribute group (X axis).
2. Please rate the **CLARITY** of this attribute group (Y axis).



### Further explanation

The use-related quality indicators entail:

1. **Usability** means MATech qualities such as simplicity, organization, intuitiveness and reliability. High usability is indicated when MATech is simple, well organized, intuitive and reliable.
2. **Satisfaction** means satisfaction with MATech assessments were performed to control the level of satisfaction of the end user.
3. **Customization** means the MATech or some parts of it can be customized to the needs of the individual user.
4. **Aesthetics** is the perception of the product, which can be described as aesthetic (size, layout, graphic, font size etc.) as this was evaluated in a research project or external review.
5. **Readability** means the ease of understanding or comprehension achieved by the style of writing. The reader must be able to recognize (decode) the words in the medical device patient labelling as well as comprehend the meaning of the text.

*The definitions of quality indicators are based on a checklist of e-health quality criteria (under development), the Mobile Application Rating Scale (MARS), and the Consort-EHEALTH guideline. For a more detailed view of the respective sub-levels with labels and definitions please check the interactive graph or the Excel file under supporting information.*

### D3.2.1 Implementation outcomes

**Implementation outcomes are characteristics of the technology regarding its implementability in clinical practice, as supported by evidence.**

1. Please rate the **RELEVANCE** of this attribute group (X axis).
2. Please rate the **CLARITY** of this attribute group (Y axis).

### Further explanation

Implementation outcomes entail:

**Acceptability** means whether stakeholders reported satisfaction with various features of the technology and the experience of using it to support medication adherence

**Feasibility** means whether stakeholders perceived the technology as practical and fit for use in supporting medication adherence

**Sustainability** means whether stakeholders perceived the technology as appropriate for routine sustained use in supporting medication adherence

*Definitions of implementation outcomes and strategies are based on Proctor et al. (2011) "Outcomes for Implementation Research: Conceptual Distinctions, Measurement Challenges, and Research Agenda", the Consolidated framework for advancing implementation science (CFIR), the Expert Recommendations for Implementing Change (ERIC) and the Interventienet.nl website. For a more detailed view of the respective sub-levels with labels and definitions please check the interactive graph or the Excel file under supporting information.*

### D3.2.2 Implementation strategies

**Implementation strategies are characteristics of the technology that facilitate implementation and maintenance of the technology in a setting.**

1. Please rate the **RELEVANCE** of this attribute group (X axis).
2. Please rate the **CLARITY** of this attribute group (Y axis).

### Further explanation

Implementation strategies entail:

1. **Training** are activities to teach stakeholders about the technology and how to use it and integrate in the medication adherence support processes.
2. **Educational materials** are materials stakeholders may consult to learn about the technology and how to use it and integrate in the medication adherence support processes.
3. **Funding** are financial strategies and/or additional costs to facilitate adoption of the technology into medication adherence support practice.
4. **Expertise sharing** are information from previous implementations on what helped adopt the technology into medication adherence support practice.
5. **Technical assistance** are systems to support implementation of the technology into medication support practice
6. **Consultation** means accessing direct support from experts for the implementation of the technology into medication support practice.
7. **Accreditation & legal approvals** are credentials and/or licensing to acquire or prove to be able to use the technology in a setting in the conditions necessary for optimal safety and effectiveness.
8. **Collaborations** means involving multiple institutions in delivering the medication adherence support solution that uses the technology.
9. **Access to additional resources** means access to data, space, laboratory facilities.

*Definitions of implementation outcomes and strategies are based on Proctor et al. (2011) "Outcomes for Implementation Research: Conceptual Distinctions, Measurement Challenges, and Research Agenda", the Consolidated framework for advancing implementation science (CFIR), the Expert Recommendations for Implementing Change (ERIC) and the Interventienet.nl website. For a more detailed view of the respective sub-levels with labels and definitions please check the interactive graph or the Excel file under supporting information.*

1  
2  
3 **Thank you and see you soon!**  
4

5 Dear panellist,  
6

7 you have made it to the end of the survey. We appreciate your effort and valuable contribution to  
8 development of the ENABLE repository of medication adherence technologies.  
9

10 **Please remember to visit the survey several times during the study period** to reconsider your  
11 answers based on the aggregated feedback and discussions with the other anonymous panellists.  
12 Reminders will be sent every 2 weeks to remind you to log in and participate again.  
13

14  
15 Please don't hesitate to contact us on [wg2costenable@gmail.com](mailto:wg2costenable@gmail.com) in case of any questions.  
16

17 Best wishes,  
18

19 The ENABLE WG2 Steering Committee  
20

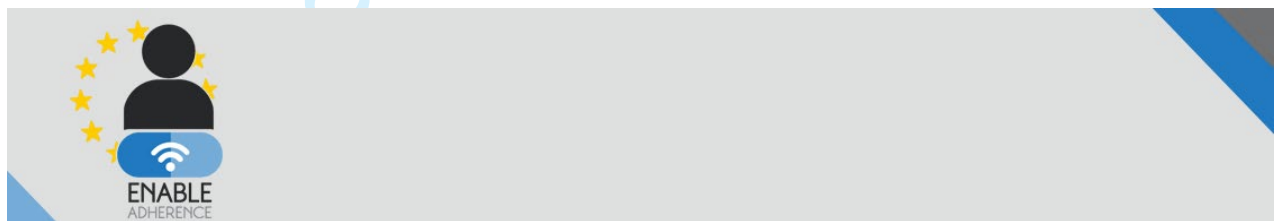



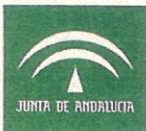

1  
2  
3 Dra. Dña. Gloria Luque Fernández, Secretaria del CEI Provincial de Málaga

4  
5 CERTICA:

6  
7 Que en la sesión de CEI de fecha: 29/04/2021 ha evaluado la propuesta de D/Dña.: Pilar Barnestein Fonseca, referido a la MS1 del  
8 Proyecto de Investigación: "COST Action "European Network to Advance Best practices & technoLogY on medication adherencE"  
9 (ENABLE) ".  
10

11 Este Comité lo considera ética y metodológicamente correcto.

12  
13 La composición del CEI en esta sesión es la siguiente:

14  
15  
16  
17 Dra. Ana Alonso Torres (UGC Neurociencias) Dra. Elena Sánchez Yáñez  
18 Dra. Encarnación Blanco Reina (Farmacología Clínica) Dr. Antonio López Téllez (Médico de Familia)  
19 Dra. Begoña Jiménez Rodríguez (UGC Oncología)  
20 Dra. Marta Blasco Alonso (Obst. y Ginecología)  
21 Dr. Rafael Carvia Ponsaille (Anatomía Patológica)  
22 D<sup>a</sup>. Ana Díaz Ruíz (Licenciada en Derecho)  
23 Dr. José C. Fernández García (UGC Endocrinología y Nutrición)  
24 Dr. Manuel Herrera Gutiérrez (UGC UCI)  
25 Dra. M<sup>a</sup>. Victoria de la Torre Prados (UMA)  
26 Dr. José Leiva Fernández (Médico Familia)  
27 Dra. M<sup>a</sup> Dolores López Carmona (Medicina Interna)  
28 Dr. Jesús López del Peral (Esp. Protec. Datos)  
29 Dña. Carmen López Gálvez del Postigo (Miembro Lego)  
30 D<sup>a</sup>. Inmaculada Doña Díaz (Alergología)  
31 Dra. Gloria Luque Fernández (Investigación)  
32 Dra. Cristobalina Mayorga Mayorga (Laboratorio)  
33 Dra. M<sup>a</sup> Angeles Rosado Souvirón (UGC Farmacia)  
34 Dra. Leonor Ruíz Sicilia (UGC Salud Menta.)  
35  
36  
37  
38  
39  
40  
41  
42  
43  
44  
45  
46  
47  
48  
49

50 Lo que firmo en Málaga, a 29 de abril de 2021

51  
52  
53  
54  
55  
56  
57  
58  
59  
60

Fdo.: Dra. Gloria Luque Fernández  
Secretaria del CEI



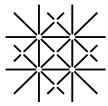

Universität  
Basel

Verwaltungsdirektion

Universität Basel, Verwaltungsdirektion, Postfach, 4001 Basel

Mrs Janette Ribaut  
Bernoullistrasse 28  
4056 Basel

Basel, 25. Mai 2021

**Data Protection Assessment of your project “Developing a medication adherence technologies repository: an online real-time Delphi survey protocol”**

Dear Ms. Ribaut

I would like to confirm, that we have reviewed your project with regard to data protection and data security. Based on the documents provided to us, we can confirm that data protection is complied with in your project. In particular, since you collect the survey responses exclusively anonymously and no conclusions can be drawn about individual persons.

Yours sincerely,

Danielle Kaufmann  
Data Protection Officer

Seite 1/2

Universität Basel  
Verwaltungsdirektion  
Petersgraben 35, Postfach 2148  
4001 Basel, Switzerland

Danielle Kaufmann, lic. iur.  
Datenschutzbeauftragte  
T +41 61 207 30 22  
M +41 79 381 20 72  
Danielle.kaufmann@unibas.ch

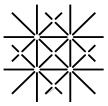

Universität  
Basel

Verwaltungsdirektion

1  
2  
3  
4  
5  
6  
7  
8  
9  
10  
11  
12  
13  
14  
15  
16  
17  
18  
19  
20  
21  
22  
23  
24  
25  
26  
27  
28  
29  
30  
31  
32  
33  
34  
35  
36  
37  
38  
39  
40  
41  
42  
43  
44  
45  
46  
47  
48  
49  
50  
51  
52  
53  
54  
55  
56  
57  
58  
59  
60

For peer review only

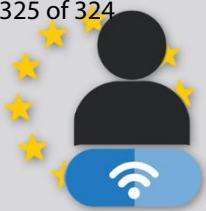

**ENABLE**  
ADHERENCE



## General data protection statement (GDPR)

By continuing the survey, you declare that you have read, understood and agreed with the following statements:

- 1. This Delphi survey is performed by the COST Action ENABLE (CA19132) Working group 2 with principal investigators Alexandra Lelia Dima and Urska Nabergoj Makovec.*
- 2. The aim of the study is to explore the level of agreement on the proposed structure for a repository of medication adherence technologies*
- 3. Participation in the survey is voluntary and the study is designed to ensure participants' anonymity as one of the key features of the Delphi approach.*
- 4. The collected personal data will be used exclusively for conducting the study and analysing and reporting results in an aggregated form.*
- 5. In order to illustrate some study findings, we might quote statements provided by individual respondents in open text fields; however, the Delphi platform ensures that no personal data can linked to such statements.*
- 6. A data protection assessment was carried out by the Data Protection Officer at the University of Basel. According to this instance the Delphi study protocol was determined as compliant with data protection and security standards.*
- 7. The personal data used for conducting this study will be stored until the end of the COST Action ENABLE (October 2024). You can address your rights regarding access to, correction of or limitation of use of your personal data through the email [wq2enablecost@gmail.com](mailto:wq2enablecost@gmail.com) anytime during that time period.*



# BMJ Open

## Developing a medication adherence technologies repository: proposed structure and protocol for an online real-time Delphi study

|                                 |                                                                                                                                                                                                                                                                                                                                                                                                                                                                                                                                                                                                                                                                                                                                                                                                                                                                                                                                                                                                                                                                                                                                                                                                                                                                                                                                                                                                                                                                                                                                                                                                                                                                                                                                                                                                                                                                                                                                                                                                                              |
|---------------------------------|------------------------------------------------------------------------------------------------------------------------------------------------------------------------------------------------------------------------------------------------------------------------------------------------------------------------------------------------------------------------------------------------------------------------------------------------------------------------------------------------------------------------------------------------------------------------------------------------------------------------------------------------------------------------------------------------------------------------------------------------------------------------------------------------------------------------------------------------------------------------------------------------------------------------------------------------------------------------------------------------------------------------------------------------------------------------------------------------------------------------------------------------------------------------------------------------------------------------------------------------------------------------------------------------------------------------------------------------------------------------------------------------------------------------------------------------------------------------------------------------------------------------------------------------------------------------------------------------------------------------------------------------------------------------------------------------------------------------------------------------------------------------------------------------------------------------------------------------------------------------------------------------------------------------------------------------------------------------------------------------------------------------------|
| Journal:                        | <i>BMJ Open</i>                                                                                                                                                                                                                                                                                                                                                                                                                                                                                                                                                                                                                                                                                                                                                                                                                                                                                                                                                                                                                                                                                                                                                                                                                                                                                                                                                                                                                                                                                                                                                                                                                                                                                                                                                                                                                                                                                                                                                                                                              |
| Manuscript ID                   | bmjopen-2021-059674.R1                                                                                                                                                                                                                                                                                                                                                                                                                                                                                                                                                                                                                                                                                                                                                                                                                                                                                                                                                                                                                                                                                                                                                                                                                                                                                                                                                                                                                                                                                                                                                                                                                                                                                                                                                                                                                                                                                                                                                                                                       |
| Article Type:                   | Protocol                                                                                                                                                                                                                                                                                                                                                                                                                                                                                                                                                                                                                                                                                                                                                                                                                                                                                                                                                                                                                                                                                                                                                                                                                                                                                                                                                                                                                                                                                                                                                                                                                                                                                                                                                                                                                                                                                                                                                                                                                     |
| Date Submitted by the Author:   | 14-Mar-2022                                                                                                                                                                                                                                                                                                                                                                                                                                                                                                                                                                                                                                                                                                                                                                                                                                                                                                                                                                                                                                                                                                                                                                                                                                                                                                                                                                                                                                                                                                                                                                                                                                                                                                                                                                                                                                                                                                                                                                                                                  |
| Complete List of Authors:       | <p>Naberogj Makovec , Urska; Univerza v Ljubljani Fakulteta za farmacijo, Faculty of Pharmacy</p> <p>Goetzinger, Catherine ; Luxembourg Institute of Health, Deep Digital Phenotyping Research Unit, Department of Population Health; University of Luxembourg Faculty of Science Technology and Medicine</p> <p>Ribaut, Janette; University of Basel Faculty of Medicine, Institute of Nursing Science, Department Public Health; University Hospital Basel, Department of Theragnostic, Hematology</p> <p>Barnestein-Fonseca, Pilar; CUDECA Institute for Training and Research in Palliative Care, CUDECA Hospice Foundation, Málaga; Instituto de Investigación Biomédica de Málaga-IBIMA , Group C08: Pharma economy: Clinical and economic evaluation of medication and Palliative Care</p> <p>Hauptenthal, Frederik; Medical University of Vienna Department of Medicine II, Division of Nephrology and Dialysis</p> <p>Herdeiro, Maria; University of Aveiro, Institute of Biomedicine, Medical Sciences Department</p> <p>Grant, Sean; Indiana University Richard M Fairbanks School of Public Health, Department of Social &amp; Behavioral Sciences,</p> <p>Jácome, Cristina; University of Porto Faculty of Medicine, Department of Community Medicine, Information and Health Decision Sciences (MEDCIDS); University of Porto Faculty of Medicine, Center for Health Technology and Services Research (CINTESIS)</p> <p>Marques Roque, Fatima; Polytechnic Institute of Guarda Research Unit for Inland Development, Research Unit for Inland Development</p> <p>Smits, Dins; Riga Stradins University, Faculty of Public Health and Social Welfare, Department of Public Health and Epidemiology</p> <p>Tadic, Ivana; University of Belgrade Faculty of Pharmacy, Department of Social Pharmacy and Pharmaceutical Legislation</p> <p>Dima, Alexandra; Université Claude Bernard Lyon 1, , Research on Healthcare Performance (RESHAPE), INSERM U1290 ENABLE, Collaborators; COST Action ENABLE (CA19132)</p> |
| <b>Primary Subject Heading</b>: | Global health                                                                                                                                                                                                                                                                                                                                                                                                                                                                                                                                                                                                                                                                                                                                                                                                                                                                                                                                                                                                                                                                                                                                                                                                                                                                                                                                                                                                                                                                                                                                                                                                                                                                                                                                                                                                                                                                                                                                                                                                                |
| Secondary Subject Heading:      | Health informatics, Patient-centred medicine, Public health                                                                                                                                                                                                                                                                                                                                                                                                                                                                                                                                                                                                                                                                                                                                                                                                                                                                                                                                                                                                                                                                                                                                                                                                                                                                                                                                                                                                                                                                                                                                                                                                                                                                                                                                                                                                                                                                                                                                                                  |
| Keywords:                       | Health informatics < BIOTECHNOLOGY & BIOINFORMATICS, PUBLIC HEALTH, SOCIAL MEDICINE                                                                                                                                                                                                                                                                                                                                                                                                                                                                                                                                                                                                                                                                                                                                                                                                                                                                                                                                                                                                                                                                                                                                                                                                                                                                                                                                                                                                                                                                                                                                                                                                                                                                                                                                                                                                                                                                                                                                          |



1  
2  
3  
4  
5  
6  
7  
8  
9  
10  
11  
12  
13  
14  
15  
16  
17  
18  
19  
20  
21  
22  
23  
24  
25  
26  
27  
28  
29  
30  
31  
32  
33  
34  
35  
36  
37  
38  
39  
40  
41  
42  
43  
44  
45  
46  
47  
48  
49  
50  
51  
52  
53  
54  
55  
56  
57  
58  
59  
60

|                                                                                                                                                         |
|---------------------------------------------------------------------------------------------------------------------------------------------------------|
|                                                                                                                                                         |
| Note: The following files were submitted by the author for peer review, but cannot be converted to PDF. You must view these files (e.g. movies) online. |
| Fig 1.tiff                                                                                                                                              |

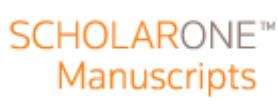

# 1 Developing a medication adherence technologies repository: 2 proposed structure and protocol for an online real-time Delphi study

3  
4 **Urška Nabergoj Makovec** (ORCID ID: 0000-0001-5194-3314)

5 *University of Ljubljana, Faculty of Pharmacy, Department of Social Pharmacy, Ljubljana, Slovenia*

6 [urska.nabergoj.makovec@ffa.uni-lj.si](mailto:urska.nabergoj.makovec@ffa.uni-lj.si)

7 **Catherine Goetzinger** (ORCID ID :0000-0002-6377-1078)

8 *Deep Digital Phenotyping Research Unit, Department of Precision Health, Luxembourg Institute of Health, Strassen, Luxembourg.*

9 *University of Luxembourg, Faculty of Science, Technology and Medicine, Luxembourg*

10 [catherine.goetzinger@lih.lu](mailto:catherine.goetzinger@lih.lu)

11 **Janette Ribaut** (ORCID ID: 0000-0003-0654-4052)

12 *Institute of Nursing Science, Department Public Health, Faculty of Medicine, University of Basel, Switzerland & Department of Theragnostic, Hematology, University Hospital of Basel, Switzerland*

13 [janette.ribaut@unibas.ch](mailto:janette.ribaut@unibas.ch)

14 **Pilar Barnestein-Fonseca** (ORCID ID 0000-0003-2767-8017)

15 *CUDECA Institute for Training and Research in Palliative Care, CUDECA Hospice Foundation, Málaga, Spain.*

16 *Instituto de Investigación Biomédica de Málaga-IBIMA Group C08: Pharma economy: Clinical and economic evaluation of medication and Palliative Care, Málaga, Spain*

17 [pilar.barnestein@ibima.eu](mailto:pilar.barnestein@ibima.eu)

18 **Frederik Haupenthal** (ORCID ID: 0000-0002-7708-9045)

19 *Division of Nephrology and Dialysis, Department of Medicine II, Medical University of Vienna, Austria*

20 [frederik.haupenthal@meduniwien.ac.at](mailto:frederik.haupenthal@meduniwien.ac.at)

21 **Maria Teresa Herdeiro** (ORCID ID: 0000-0002-0500-4049)

22 *Institute of Biomedicine, Medical Sciences Department, University of Aveiro, Aveiro, Portugal*

23 [teresaherdeiro@ua.pt](mailto:teresaherdeiro@ua.pt)

24 **Sean Patrick Grant** (ORCID: 0000-0002-7775-3022)

25 *Department of Social & Behavioral Sciences, Richard M. Fairbanks School of Public Health, Indiana University, Indianapolis, United States of America*

26 [spgrant@iu.edu](mailto:spgrant@iu.edu)

27 **Cristina Jácome** (ORCID ID: 0000-0002-1151-8791)

28 *Department of Community Medicine, Information and Health Decision Sciences (MEDCIDS), Faculty of Medicine, University of Porto, Porto, Portugal*

29 *Center for Health Technology and Services Research (CINTESIS), Faculty of Medicine, University of Porto, Porto, Portugal*

30 [cristinajacome.ft@gmail.com](mailto:cristinajacome.ft@gmail.com)

31 **Fátima Roque** (ORCID ID: 0000-0003-0169-3788)

32 *Research Unit for Inland Development, Polytechnic of Guarda, Guarda, Portugal*

33 [froque@ipg.pt](mailto:froque@ipg.pt)

34 **Dins Smits** (ORCID: 0000-0001-5514-7374)

35 *Faculty of Public Health and Social Welfare, Department of Public Health and Epidemiology, Riga Stradins University, Riga, Latvia*

36 [dins.smits@rsu.lv](mailto:dins.smits@rsu.lv)

37 **Ivana Tadic** (ORCID: 0000-0001-5488-9261)

38 *University of Belgrade, Faculty of Pharmacy, Department of Social Pharmacy and Pharmaceutical Legislation, Belgrade, Serbia*

39 [ivana.tadic@pharmacy.bg.ac.rs](mailto:ivana.tadic@pharmacy.bg.ac.rs)

1  
2  
3 48 **Alexandra Lelia Dima** (ORCID: 0000-0002-3106-2242)  
4 49 *Université Claude Bernard Lyon 1, Research on Healthcare Performance (RESHAPE), INSERM U1290, Lyon, France*  
5 50 [alexandra.dima@univ-lyon1.fr](mailto:alexandra.dima@univ-lyon1.fr)  
6 51

7 52 **and European Network to Advance Best Practices and Technology on Medication Adherence**  
8 53 **(ENABLE)**  
9 54

10 55  
11 56 **Corresponding author:**

12 57 Urska Nabergoj Makovec

13 58 *ORCID ID: 0000-0001-5194-3314*

14 59 University of Ljubljana, Faculty of Pharmacy, Department of Social Pharmacy,

15 60 Askerceva 7

16 61 1000 Ljubljana, Slovenia

17 62 Telephone: +386 1 4769 565

18 63 [urska.nabergoj.makovec@ffa.uni-lj.si](mailto:urska.nabergoj.makovec@ffa.uni-lj.si)  
19 64  
20 65

21 66 **Key words:** health technology, medication adherence, Delphi study, stakeholder engagement, digital  
22 67 health, behavioural science, implementation science  
23 68  
24 69

25 70 **Word count:**

26 71 Number of words: 4242

27 72 Abstract: 297

28 73 Strengths and limitations: 158  
29  
30  
31  
32  
33  
34  
35  
36  
37  
38  
39  
40  
41  
42  
43  
44  
45  
46  
47  
48  
49  
50  
51  
52  
53  
54  
55  
56  
57  
58  
59  
60

## 74 Article Summary

### 75 Abstract

76 **Introduction:** An online interactive repository of available medication adherence technologies may  
77 facilitate their selection and adoption by different stakeholders. Developing a repository is among the  
78 main objectives of the ENABLE COST Action (CA19132). However, meeting the needs of diverse  
79 stakeholders requires careful consideration of the repository structure.

80 **Methods and analysis:** A real-time online Delphi study by stakeholders from 39 countries with  
81 research, practice, policy, patient representation and technology development backgrounds will be  
82 conducted. Eleven ENABLE members from 9 European countries formed an interdisciplinary steering  
83 committee to develop the repository structure, prepare study protocol and perform it. Definitions of  
84 medication adherence technologies and their attributes were developed iteratively through literature  
85 review, discussions within the steering committee and ENABLE Action members, following ontology  
86 development recommendations. Three domains (*product and provider information (D1)*, *medication*  
87 *adherence descriptors (D2)* and *evaluation and implementation (D3)*) branching in 13 attribute groups  
88 are proposed: *product and provider information, target use scenarios, target health conditions,*  
89 *medication regimen, medication adherence management components, monitoring/measurement*  
90 *methods and targets, intervention modes of delivery, target behaviour determinants, behaviour*  
91 *change techniques, intervention providers, intervention settings, quality indicators and*  
92 *implementation indicators*. Stakeholders will evaluate the proposed definition and attributes'  
93 relevance, clarity and completeness and have multiple opportunities to reconsider their evaluations  
94 based on aggregated feedback in real-time. Data collection will stop when the predetermined  
95 response rate will be achieved. We will quantify agreement and perform analyses of process indicators  
96 on the whole sample and per stakeholder group.

97 **Ethics and dissemination:** Ethical approval for the COST ENABLE activities was granted by the Malaga  
98 Regional Research Ethics Committee. The Delphi protocol was considered compliant regarding data  
99 protection and security by the Data Protection Officer from University of Basel. Findings from the  
100 Delphi study will form the basis for the ENABLE repository structure and related activities.

101

## 102 **Strengths and limitations of this study**

- 103 ● The diverse expertise and geographical spread of the ENABLE COST Action members (39 European  
104 countries) and their wider professional network represents a unique and timely opportunity to  
105 develop a repository of medication adherence technologies that meets the needs of a diverse  
106 audience.
- 107 ● The scope and content of the Delphi survey represent the work of extensive literature review  
108 combined with multidisciplinary expertise of the steering committee.
- 109 ● The real-time Delphi approach provides improved efficiency of the process, shortens the time of  
110 study completion and is particularly suitable for managing larger groups and including people from  
111 different geographic locations.
- 112 ● The Delphi protocol will use state of the art methodology to measure agreement and  
113 predetermine agreement/consensus criteria as well as stability of responses.
- 114 ● The real-time approach requires specialized software, which limits the range of possible survey  
115 configurations and raw data availability for detailed process analyses and requires relatively  
116 elaborate instructions for participants, which may increase participation burden.

## 120 Introduction

121 Taking medication as prescribed often proves difficult for people when managing their health,  
122 particularly in the long term.<sup>1</sup> Medication adherence is suboptimal in numerous chronic conditions<sup>2 3</sup>  
123 and has a negative impact on chronic disease management, patient's general health status, quality of  
124 life, working ability and health care costs.<sup>2 4 5</sup> Research on medication adherence has expanded and  
125 contributed to raised awareness of the prevalence of suboptimal adherence and how it affects health  
126 outcomes. Digital technologies have increasingly gained interest as new interventions for supporting  
127 medication adherence have been developed. A diversity of technologies has been proposed, from  
128 electronic monitoring devices to mobile applications, to support medication adherence  
129 measurements and empower patients with their disease management. However, the rapidly  
130 expanding offer of medication adherence technologies (MATech) makes it increasingly difficult to  
131 access, evaluate, and compare different technologies to make informed decisions and select  
132 appropriate tools for specific clinical or research needs. In a 2018 review by Ahmed et al.<sup>6</sup>, 5881  
133 medication adherence apps were identified on Google Play and Apple App Stores. However, most of  
134 them lacked evidence of effectiveness and didn't involve healthcare professionals (HCPs) during their  
135 development.<sup>6</sup> Lack of collaboration between stakeholders results in a limited number of developed  
136 MATech actually being implemented into the healthcare systems and used daily by HCPs and/or  
137 patients.<sup>7</sup> Furthermore, due to differences in healthcare systems across countries, healthcare  
138 organisations and reimbursement processes, harmonization of implementation strategies are lagging  
139 behind, which further delays adoption of best practices across countries.<sup>4 7</sup>

141 The ENABLE COST Action ('European Network to Advance Best practices & technoLogY on medication  
142 adherencE', CA19132)<sup>8</sup> was initiated by experts in medication adherence and digital technologies to  
143 fill these gaps regarding evidence and implementation of MATech within healthcare systems. ENABLE  
144 aims to raise awareness of available technologies, expand multidisciplinary knowledge on medication  
145 adherence at multiple levels, accelerate knowledge translation to clinical practice, and collaborate  
146 towards economically viable implementation of best practices and technologies across European  
147 healthcare systems. These objectives are being pursued within a 4-year period (2020-2023), by three  
148 distinct and interrelated working groups (WGs) that map best practices available (WG1), identify and  
149 showcase adherence technologies (WG2), and identify suitable reimbursement strategies for  
150 implementation in healthcare systems (WG3), supported transversally by a WG4 coordinating  
151 communication and dissemination. At present, the ENABLE Action includes a large interdisciplinary  
152 network of experts in medication adherence from 39 European countries.<sup>8</sup>

153

1  
2  
3 154 Effective implementation of technology-supported healthcare has been facilitated by centralisation of  
4  
5 155 information in public repositories or 'solution showrooms', where users can search for technologies  
6  
7 156 that meet their specific requirements.<sup>9</sup> Several such repositories already exist in the field of digital  
8  
9 157 health, including medication adherence (e.g. NHS app Library<sup>10</sup>, MyHealthApps<sup>11</sup>, InterventieNet<sup>12</sup>,  
10 158 GGD AppStore<sup>13</sup>, DIGA<sup>14</sup>, Weisse Liste<sup>15</sup>), but are limited to single countries or types of technology and  
11  
12 159 none represents a comprehensive resource to facilitate adoption of appropriate MATech across health  
13  
14 160 systems. Therefore, ENABLE sets out to develop and maintain a public online repository of MATech  
15  
16 161 where patients, HCPs, researchers, and healthcare managers would be able to access and select  
17  
18 162 technologies for adoption in their adherence management activities.<sup>8</sup> For example, a patient may be  
19  
20 163 interested more in the practical benefits of using a MATech in their daily lives, while a researcher may  
21  
22 164 be keen to examine in detail the methodology theory and evidence base behind the MATech  
23  
24 165 development. To meet this goal, the ENABLE repository would need to represent a flexible knowledge  
25  
26 166 management system that would include information relevant to the needs of different stakeholders  
27  
28 167 in a user-friendly format. In medical informatics, knowledge management relies on standardized  
29  
30 168 terminologies, classifications and ontologies to record, share and use data on healthcare research and  
31  
32 169 practice. These standards specify the types of information to encode in the form of distinct 'entities'  
33  
34 170 representing objects or phenomena in the real world and their properties ('attributes'), thus enabling  
35  
36 171 knowledge generation through inference and learning.<sup>16</sup> Adoption of evidence-based health  
37  
38 172 innovations is also facilitated by these common standards, as new technologies need to interact with  
39  
40 173 existing ecosystems in terms of both data interoperability and communicating with potential users in  
41  
42 174 appropriate domain-specific language.<sup>17</sup>

43  
44 175  
45  
46 176 The field of medication adherence is highly interdisciplinary, therefore a useful repository would cross  
47  
48 177 multiple knowledge domains and align with several standards, whether medical (e.g., World Health  
49  
50 178 Organisation International Classification of Disease; WHO ICD<sup>18</sup>), behavioural (e.g., the Behaviour  
51  
52 179 Change Intervention Ontology; BCI<sup>19 20</sup>), or technical (e.g., WHO Classification of Digital Health  
53  
54 180 Interventions; WHO DHIs<sup>21</sup>). Stakeholder involvement would need to be at the core of this  
55  
56 181 development process, to ensure its content is relevant, clear and complete, and meets community  
57  
58 182 needs.<sup>22</sup> The diverse and geographically spread ENABLE membership and their wider professional  
59  
60 183 network represents a unique and timely opportunity to conduct this work. Considering these quality  
184  
185 standards and following methodological recommendations,<sup>22-24</sup> the initial version of the repository  
186  
187 structure was prepared. A stakeholder consultation process is proposed to explore their views and  
188  
189 level of agreement on the relevance, clarity and completeness of the initial version.<sup>22 23</sup> The resulting

187 improved version would represent the structure of the ENABLE repository, which will be tested and  
 188 populated in subsequent steps with users and developers of available technologies.

189 The present manuscript describes two elements:

- 190 1) The proposed structure for the repository
- 191 2) The protocol of the real time Delphi study to explore stakeholder views on this structure

## 192 Methods and analysis

### 193 Steering committee

194 A steering committee (SC) was established within the COST ENABLE WG2 to coordinate and perform  
 195 the work. The committee includes 11 ENABLE members from 9 countries in the following areas of  
 196 expertise: adherence research and education, clinical practice, policy making and technology  
 197 development. Members are responsible for: (i) determination of the repository scope and framework  
 198 of attributes defining repository structure, (ii) preparation of the Delphi protocol, (ii) configuration  
 199 and piloting the Delphi survey, (iv) selection and invitation of stakeholders to participate in the study,  
 200 (v) moderating study performance via the online tool and (vi) analysis and interpretation of results.

### 202 Determining the repository scope and framework of attributes defining its structure

203 The determination of scope and development of the attributes' labels with definitions aimed to align  
 204 with ontology development procedures as described by Wright et al.<sup>24</sup> and follow a stakeholder  
 205 engagement methodology as described by Norris et al<sup>22</sup> and Khodyakov et al<sup>25</sup>. The principles of  
 206 ontology development, actions taken when generating the framework of attributes and examples of  
 207 how these principles are applied in the ENABLE project are presented in Table 1. The stakeholder  
 208 engagement is primarily achieved through the proposed real-time Delphi study, which is described in  
 209 more detail in the next sections.

211 *Table 1. Principles of ontology development after Wright et al.<sup>24</sup> and actions taken in the ENABLE*  
 212 *project.*

| Principles                                                                | How they have been applied in the ENABLE project                                                                                              |
|---------------------------------------------------------------------------|-----------------------------------------------------------------------------------------------------------------------------------------------|
| <i>Have specified scope and scientifically sound and relevant content</i> | Selection of established definitions for delimiting the scope, consultation of stakeholders, piloting for data input and platform search.     |
| <i>Meet the needs of community of users</i>                               | Consultation of stakeholders, steering committee and Action members sampled from the user community and including diverse areas of expertise. |
| <i>Enabling users to understand the meaning of entities</i>               | Naming examples of existing ontologies, piloting Delphi survey, technology description form, user form and platform use.                      |



|                                                                              |                                                                                                                                                                      |
|------------------------------------------------------------------------------|----------------------------------------------------------------------------------------------------------------------------------------------------------------------|
| <i>Be logically consistent</i>                                               | Using the methodology recommended for attribute description, checking consistency via Ontology Web Language (OWL).                                                   |
| <i>Be interoperable with existing ontologies</i>                             | Adopting attributes and labels available in existing ontologies and classifications, expert input on additional attributes and recommendations for interoperability. |
| <i>Reflect changes in scientific consensus and remain accurate over time</i> | Repository in open access, sustainability plan developed with Action members and stakeholders.                                                                       |

### 213 Scope and definition of MATech

214 Four established definitions were used to define the scope of repository and set the framework of  
 215 attributes: (i) *WHO definition of health technologies*<sup>26</sup>; (ii) *the ABC definition of medication*  
 216 *adherence*<sup>1</sup>; (iii) *the WHO definition of adherence to long-term therapies*<sup>2</sup> to highlight the importance  
 217 of shared decision-making between the patient and the healthcare team and (iv) *the definition of best*  
 218 *practice in healthcare proposed by the European Commission* to guide improvements in European  
 219 health systems.<sup>27</sup> The information in this definition denotes evidence on safety, efficacy, effectiveness,  
 220 cost-effectiveness, appropriateness, social and ethical values, and quality of the health care  
 221 interventions.

222  
 223 Therefore, we propose to define ***Medication Adherence Technologies (MATech) as devices,***  
 224 ***procedures or systems developed based on evidence to support patients to take their medications***  
 225 ***as agreed with healthcare providers (i.e., to initiate, implement, and persist with the medication***  
 226 ***regimen).***

- 227 - **devices, procedures or systems** emphasize the inclusion of all technologies, irrespective of their  
 228 mode of delivery (whether based on electronic or printed supports, delivered through human  
 229 interaction, or a combination of these) with the aim to construct a comprehensive repository in  
 230 which users can identify diverse technologies to fit their potentially diverse needs.
- 231 - **developed based on evidence** encompass the requirement of evidence/research that supports  
 232 at least a potential contribution to either measurement or intervention on medication adherence  
 233 (e.g., validation or pilot studies). Thus, technologies that are not (yet) supported by evidence (e.g.,  
 234 development and testing stages), or clinical practice protocols without an evidence base on at  
 235 least one aspect (safety, efficacy, effectiveness, cost-effectiveness, appropriateness, social and  
 236 ethical values or quality), will not be (yet) included in the repository until such evidence is  
 237 produced and reported.
- 238 - **support patients to take their medications as agreed with the healthcare providers (i.e. to**  
 239 **initiate, implement, and persist with the medication regimen)** encompass the contribution of

1  
2  
3 240 the technology to medication adherence management – either directly in patients’ self-  
4  
5 241 management, or by supporting professionals to offer such services to patients through all phases  
6  
7 242 of medication adherence. Thus, technologies that focus on other medication management goals,  
8  
9 243 but do not target adherence specifically would be out of scope for this repository.

10 244

11 245 Furthermore, the technologies included would need to be described in terms of their technical  
12 246 characteristics and validation, their behaviour change content, format, and context, as well as the  
13 247 characteristics facilitating appropriate implementation in care processes. Hence, evidence from  
14 248 behaviour,<sup>19 28</sup> implementation<sup>29 30</sup> and computer sciences<sup>18 21 31 32</sup> informed the initial scope and  
15 249 attributes framework to ensure key features, such as user-centeredness, trustworthiness/credibility,  
16 250 accuracy & relevance of the presented information, tailoring to the needs of different users and  
17 251 interoperability with existing evidence and other sources of information on healthcare technologies.

### 24 252 **Framework of attributes**

25 253 An initial list of attributes was developed based on a literature review and knowledge from the ENABLE  
26 254 members activities such as (i) an ongoing systematic review of e-health interventions on medication  
27 255 adherence for chronic conditions,<sup>33</sup> (ii) a checklist of e-health quality criteria under development,<sup>34</sup> (iii)  
28 256 Interventienet.nl - platform showcasing evidence-based medication adherence interventions in the  
29 257 Netherlands<sup>12</sup> and (iv) the ABC taxonomy – consensus-based terminology and definitions of  
30 258 medication adherence<sup>1</sup>.

31 259

32 260 The initial list was presented to the SC and discussed via several videoconferences to generate a more  
33 261 detailed list of attributes grouped on several themes. Each theme was further elaborated by a  
34 262 subgroup of 2 SC members following a standard format including labels and adherence-related  
35 263 definitions. We adopted the approach from BCIO<sup>19</sup>, where related attributes were searched in topic  
36 264 relevant ontologies/taxonomies/classifications and original definitions and codes were added. The  
37 265 reasons for the choice of certain attributes and labels were detailed for each attribute group. The  
38 266 proposed framework of attributes is graphically presented in Figure 1 and Supplementary file 1, while  
39 267 rationale and sources used to define the labels for the MATech repository are presented in Table 2  
40 268 and Supplementary file 2.

41 269

42 270 The final proposed framework consists of three domains (i) **product and provider information (D1)**,  
43 271 **(ii) medication adherence descriptors (D2)** and **(iii) evaluation and implementation (D3)** aligning with  
44 272 the three elements of the Donabedian health care model (i) structure, (ii) process and (iii) outcomes.<sup>35</sup>

1  
2  
3  
4  
5  
6  
7  
8  
9  
10  
11  
12  
13  
14  
15  
16  
17  
18  
19  
20  
21  
22  
23  
24  
25  
26  
27  
28  
29  
30  
31  
32  
33  
34  
35  
36  
37  
38  
39  
40  
41  
42  
43  
44  
45  
46  
47  
48  
49  
50  
51  
52  
53  
54  
55  
56  
57  
58  
59  
60

273 The domains branch in 13 attributes groups, which then branch further to up to four sublevels of  
274 attributes. Each attribute is described with a label and related definition.

275  
276 *Figure 1. The interactive graph showing the framework of attributes for MATech (“the MATech Tree”).*  
277 *The MATech tree is available as interactive feature in the Supplementary file 1.*

278  
279

For peer review only

280 Table 2. The proposed framework of attributes used in the MATech repository. Each group is presented with the core question it is addressing, rationale and  
 281 sources used to create labels within the group. A detailed description of all attribute groups with labels and definitions is also available in the Supplementary  
 282 file 2.

| Domain and attribute group                        | Core question                                                                                                         | Rationale                                                                                                                                                                                                                                                                                                                                                                                                                                                                                                                                                        | Existing ontology/ taxonomy/ classification used and adapted                                                                                                                                                                                                                                             |
|---------------------------------------------------|-----------------------------------------------------------------------------------------------------------------------|------------------------------------------------------------------------------------------------------------------------------------------------------------------------------------------------------------------------------------------------------------------------------------------------------------------------------------------------------------------------------------------------------------------------------------------------------------------------------------------------------------------------------------------------------------------|----------------------------------------------------------------------------------------------------------------------------------------------------------------------------------------------------------------------------------------------------------------------------------------------------------|
| <b>D1 (D1.1) Product and provider information</b> | <b>What product does the entry refer to, who provides it, who entered its description in the repository and when?</b> | Each entry in the ENABLE repository will refer to a unique product, which will be identified with a unique ID, provided by a unique organisation (manufacturer, developer) with its own unique ID and related metadata (e.g., date of entry, verification process, etc.) to present the identity of the described MATech and its provider.                                                                                                                                                                                                                       | <ul style="list-style-type: none"> <li>Ontology for medical technology innovation in healthcare centres by ITEMAS<sup>36</sup> – only concepts referring to products and their providers were used and adapted.</li> </ul>                                                                               |
| <b>D2.1 Target use scenario</b>                   | <b>What use scenarios and types of users is the technology intended for?</b>                                          | We can distinguish two general categories of users and their characteristics that might influence the choice of technology: (i) <i>self-management use</i> (patients and caregivers) - labels describing patients' characteristics or their condition (age, functional status, (health) literacy, etc.); (ii) <i>adherence support use</i> by healthcare or social care providers and health system managers, who can initiate a search for MATech to integrate in their practice. The provider and the setting are also the focus of separate attribute groups. | <ul style="list-style-type: none"> <li>Systematized Nomenclature of Medicine, Clinical Terms (SNOMED-CT)<sup>32</sup>,</li> <li>WHO International Classification of Functioning, Disability and Health (ICF)<sup>37</sup></li> <li>The WHO DHI<sup>21</sup></li> <li>ABC Taxonomy<sup>1</sup></li> </ul> |
| <b>D2.2 Target health conditions</b>              | <b>Which health conditions could the technology be used for as part of adherence support?</b>                         | MATech are usually developed and validated to be used in one or several clinical domains and potential users may search for technologies applicable to the health condition(s) they aim to manage. Since our stakeholders also include lay individuals, special focus was put on using simplified language to avoid misunderstandings and knowledge gaps.                                                                                                                                                                                                        | <ul style="list-style-type: none"> <li>The International Classification of Disease (ICD-11)<sup>18</sup></li> <li>The Health Research Classification System (HRCS) from the UK clinical research association<sup>38</sup></li> </ul>                                                                     |
| <b>D2.3 Medication regimen</b>                    | <b>What type of medication regimen(s) is the technology intended for?</b>                                             | Medication regimen can take different schematic forms and be of varying complexity, which may influence the complexity and extent of medication adherence. MATech may be developed for medications with different characteristics, hence the repository users should be able to indicate the type of regimen to find a MATech that fits its specific characteristics.                                                                                                                                                                                            | <ul style="list-style-type: none"> <li>SNOMED-CT<sup>32</sup></li> <li>National Cancer Institute Thesaurus (NCIT)<sup>39</sup></li> <li>Medical Subject Headings (MeSH)<sup>40</sup></li> </ul>                                                                                                          |

|                                                                   |                                                                                                                                                                              |                                                                                                                                                                                                                                                                                                                                                                                                                                                                                                                                               |                                                                                                                                                                                                                                                                                                                                                                                                                |
|-------------------------------------------------------------------|------------------------------------------------------------------------------------------------------------------------------------------------------------------------------|-----------------------------------------------------------------------------------------------------------------------------------------------------------------------------------------------------------------------------------------------------------------------------------------------------------------------------------------------------------------------------------------------------------------------------------------------------------------------------------------------------------------------------------------------|----------------------------------------------------------------------------------------------------------------------------------------------------------------------------------------------------------------------------------------------------------------------------------------------------------------------------------------------------------------------------------------------------------------|
| <p><b>D2.4 Medication adherence management components</b></p>     | <p><b>What adherence management types and phases does the technology target?</b></p>                                                                                         | <p>Management of adherence entails two management type, e.g., monitoring/measurement (D2.4.2.A) and support/intervention (D2.4.2.B) by any stakeholder, including the patient himself. Both elements may require different approaches depending on the targeted phase of adherence (D2.4.1).</p>                                                                                                                                                                                                                                              | <ul style="list-style-type: none"> <li>• ABC Taxonomy<sup>1</sup></li> </ul>                                                                                                                                                                                                                                                                                                                                   |
| <p><b>D2.4.2.A Monitoring/measurement methods and targets</b></p> | <p><b>If measurement is a component, what measurement methods does the technology use and what do they measure?</b></p>                                                      | <p>A broad range of measurement methods for adherence are available. In addition to adherence behaviours, measurement can also target adherence determinants, other self-management behaviours and outcome measures (e.g., HRQoL). Therefore, we have selected a range of measurement models as well as a selection of self-management behaviours to offer the possibility to describe technologies from a measurement perspective.</p>                                                                                                       | <ul style="list-style-type: none"> <li>• SNOMED-CT<sup>32</sup></li> <li>• extensive existing literature<sup>2 3 41</sup> and own (SC's) methodological know how</li> <li>• Train4Health (T4H) behaviour change competency framework<sup>42</sup></li> <li>• BCIO<sup>19</sup></li> </ul>                                                                                                                      |
| <p><b>D2.4.2.B.1 Intervention modes of delivery</b></p>           | <p><b>If intervention is a component, how is it delivered to its users?</b></p>                                                                                              | <p>Mode of delivery is 'physical or informational medium through which a given behaviour change intervention is provided'<sup>19</sup>, can affect the intervention effectiveness. Although digitalization has entered in all aspects of everyday life, the analogue mode is still very relevant. This is especially true within the elderly, who on one hand require more support in medication adherence<sup>43</sup> and are on the other hand less digitally-literate.<sup>44</sup> Hence, the repository should encompass all modes.</p> | <ul style="list-style-type: none"> <li>• BCIO<sup>19</sup>; specifically a taxonomy of modes of delivery of BCI<sup>45</sup></li> </ul>                                                                                                                                                                                                                                                                        |
| <p><b>D2.4.2.B.2 Target behaviour determinants</b></p>            | <p><b>If intervention is a component, what reasons for non-adherence can the technology help address?</b></p>                                                                | <p>The MATech can address different reasons for non-adherence, defined as determinants of behaviour, which can be non-modifiable or modifiable.<sup>2 19 46</sup> Individual-level and modifiable determinants are encompassed as capability (psychological and physical), opportunity (social and physical), and motivation (reflective and automatic), also known as the COM-B model.<sup>47</sup></p>                                                                                                                                      | <ul style="list-style-type: none"> <li>• Capability, Opportunity, Motivation and Behaviour (COM-B) model and Behaviour Change Wheel<sup>47</sup></li> <li>• Theoretical Domains Framework (TDF)<sup>48</sup></li> <li>• BCIO<sup>19</sup>, specifically The Mechanisms of Action (MoA) Ontology<sup>49 50</sup></li> <li>• International Classification of Health Interventions (ICHI)<sup>31</sup></li> </ul> |
| <p><b>D2.4.2.B.3 Behaviour change techniques</b></p>              | <p><b>If intervention is a component, what are the 'active ingredients' present in the technology that may trigger change in the reasons for non-adherence targeted?</b></p> | <p>To trigger/support change in a health behaviour, interventions act by generating change in determinants of the targeted behaviour. The 'active ingredients' in these interventions are labelled 'behaviour change techniques' (BCTs). We included only user-level BCTs (i.e., BCTs that provide support to medication users) and mapped them according to the COM-B model and across domains.<sup>48</sup> If considered relevant, HCPs level or system-level BCT can be included in the future</p>                                        | <ul style="list-style-type: none"> <li>• Behaviour change technique (BCT) taxonomy<sup>28 51</sup></li> <li>• Train4Health (T4H) behaviour change competency framework<sup>42</sup></li> <li>• Cards for Change (C4C)<sup>52 53</sup></li> </ul>                                                                                                                                                               |

|                                                                      |                                                                                                                                          |                                                                                                                                                                                                                                                                                                                                                                                                                                                                                                                                                                                                                                                                                                                                                                                                                  |                                                                                                                                                                                                                                                                                                                                                                                                                              |
|----------------------------------------------------------------------|------------------------------------------------------------------------------------------------------------------------------------------|------------------------------------------------------------------------------------------------------------------------------------------------------------------------------------------------------------------------------------------------------------------------------------------------------------------------------------------------------------------------------------------------------------------------------------------------------------------------------------------------------------------------------------------------------------------------------------------------------------------------------------------------------------------------------------------------------------------------------------------------------------------------------------------------------------------|------------------------------------------------------------------------------------------------------------------------------------------------------------------------------------------------------------------------------------------------------------------------------------------------------------------------------------------------------------------------------------------------------------------------------|
| <p><b>D2.4.2.B.4</b><br/><i>Intervention providers</i></p>           | <p><b><i>If intervention is a component, who delivers the intervention to users?</i></b></p>                                             | <p>The provider of intervention is a role played by a person, population or organization that provides/delivers an intervention. This includes their occupational role and type of relatedness. In medication adherence, the provider is often HCP, hence the quality of the <i>HCP-patient</i> relationships (communication skills, collaborative decision making, trust in the HCP, HCPs' cultural competences) correlate with patients' adherence.<sup>54</sup></p>                                                                                                                                                                                                                                                                                                                                           | <ul style="list-style-type: none"> <li>● BCIO<sup>19</sup>, specifically Intervention Source Ontology<sup>55</sup></li> <li>● Gender, Sex, and Sexual Orientation ontology (GSSO)<sup>56</sup></li> </ul>                                                                                                                                                                                                                    |
| <p><b>D2.4.2.B.5</b><br/><i>Intervention settings</i></p>            | <p><b><i>If intervention is a component, where is the service for improving adherence delivered?</i></b></p>                             | <p>Setting is the social and physical environment in which the technology is used to manage medication adherence. Implementation<sup>29</sup> and behavioural<sup>19</sup> science emphasize the importance of understanding and describing the environment in which a certain intervention is delivered as it can significantly influence its outcomes. In addition, not every intervention is applicable or transferable to every setting. We can distinguish between physical and virtual settings as well as the possibility of applying the intervention in any setting.</p>                                                                                                                                                                                                                                | <ul style="list-style-type: none"> <li>● BCIO<sup>19</sup>, specifically Intervention Setting Ontology<sup>57</sup></li> <li>● Consolidated framework for advancing implementation science (CFIR)<sup>29</sup></li> </ul>                                                                                                                                                                                                    |
| <p><b>D3.1</b> <i>Quality indicators</i></p>                         | <p><b>How does the technology meet key quality indicators from different perspectives?</b></p>                                           | <p>Quality indicators (QI) are standardized, evidence-based, and measurable items for monitoring and evaluating the quality of healthcare performance.<sup>58</sup> They describe the structure, process and outcomes of care<sup>35</sup> and based on them the standards and review criteria are developed. The target audience of the repository is very diverse and with specific individual needs related to MATech. Thus, we decided to group quality indicators according to their different purposes of use (e.g., general, research, decision making, use).</p>                                                                                                                                                                                                                                         | <ul style="list-style-type: none"> <li>● A checklist of e-health quality criteria (under development)<sup>34</sup></li> <li>● Mobile Application Rating Scale (MARS)<sup>59</sup></li> <li>● Consort-EHEALTH guideline<sup>60</sup></li> <li>● Health Technology Assessment (HTA) Core Model, version 3.0<sup>61</sup></li> <li>● O'Rourke et al. The new definition of health technology assessment<sup>62</sup></li> </ul> |
| <p><b>D3.2</b><br/><i>Implementation outcomes and strategies</i></p> | <p><b>What implementation outcomes and strategies are needed and available for adopting this technology in the intended setting?</b></p> | <p>Implementation sciences provides knowledge on how to facilitate the adoption and use of technologies in real-world settings. The development of MATech often starts without considering the actual use in real-world setting, which prevents successful adoption and scaling up into clinical care.<sup>63</sup> Three implementation outcomes were selected for ENABLE repository: acceptability; feasibility and sustainability to target early, mid and late implementation phases. In addition, eight implementation strategies were selected and adapted to present information on training users for working with MATech, availability of education materials, expertise needed to use the MATech previous implementation experiences, financial, accreditation and other legal aspects of the use.</p> | <ul style="list-style-type: none"> <li>● Proctor et al. Outcomes for Implementation Research<sup>64</sup></li> <li>● Consolidated framework for advancing implementation science (CFIR)<sup>29</sup></li> <li>● The Expert Recommendations for Implementing Change (ERIC)<sup>65</sup></li> <li>● Interventienet.nl<sup>12</sup></li> </ul>                                                                                  |

## 284 Choice and description of the study design

285 We will perform an online real-time Delphi (RT-Delphi) survey to explore the level of agreement on the  
286 MATech definition and relevance, clarity and completeness of the proposed framework of attributes  
287 defining the repository structure and gain a deeper insight into stakeholders' distinct needs and  
288 requirements. The Delphi process is a flexible iterative process to consult and/or reach consensus  
289 among a group of people on a particular topic.<sup>66 67</sup> The key characteristics of a Delphi study are  
290 anonymity, iteration, controlled feedback, and statistical description of group response.<sup>68</sup> The RT-  
291 Delphi approach was developed by Gordon and Pease to improve efficiency of the process and shorten  
292 the time of performance.<sup>69</sup> Since then, several online tools have been developed to facilitate the RT-  
293 Delphi design<sup>70</sup> and literature describing the use of RT-Delphi and comparison with the traditional  
294 multi-round Delphi approach is growing.<sup>23 71-74</sup> In contrast to the traditional Delphi, the real time  
295 approach is round-less and offers a constant iteration by providing immediate (real-time) individual  
296 and aggregated feedback. Based on new information participants can re-think and modify their  
297 answers, which could lead to reconciliation of opinions and eventually to consensus. Participants are  
298 encouraged to re-visit and engage in the survey several times during the study period.<sup>69 70 72 74</sup> In  
299 comparison with the traditional approach, the real time approach encompasses all key Delphi  
300 features<sup>73</sup> and is similar from all key perspectives.<sup>23 71 73 74</sup> Furthermore, the real time approach is  
301 particularly suitable for managing larger groups, decreases moderators' workload, simplifies inclusion  
302 of people from different geographic locations and can be leaner in costs.<sup>23 69 74</sup> On the other hand, the  
303 approach requires specific software, which can sometimes be rigid in terms of survey configuration  
304 and analysis, contributes to increases study costs and requires specific instructions for participants.<sup>70</sup>  
305 <sup>74</sup> Acknowledging the potential challenges, the advantages of the approach outweighed them and  
306 supported a decision to adopt the real time approach for our Delphi study.

## 308 Sampling and sample size

309 We aim to include stakeholders from all 39 countries, participating in the COST ENABLE, covering 5  
310 different backgrounds per country: (i) adherence and eHealth research (measurement, intervention  
311 development, implementation science, health economics), (ii) clinical care (specialist and primary care  
312 practitioners providing medication adherence support), (iii) patient representation (age > 18 years,  
313 active representative in patient associations or health care facilities), (iv) policy making and (v)  
314 technology development. Hence, the targeted sample size is at least 195 panellists to be invited in the  
315 study (39 countries \* 5 stakeholders).



1  
2  
3 317 Purposive sampling will be applied to identify potential panellists. First, requests will be sent through  
4 318 the ENABLE Cost Action membership list to representatives of all 39 countries, requesting them to  
5 319 identify suitable panellists from all five backgrounds. ENABLE members will provide the steering  
6 320 committee the name, background, and e-mail for every potential panellist. Participants' e-mails will be  
7 321 entered in the online platform (eDelphi.org – Delphi method software<sup>75</sup>), which will enable anonymity  
8 322 in further steps, i.e., individual's activity and or/answers will not be linked to personal data. All  
9 323 communication with the panellists (invitation, reminders, etc.) will be performed through the  
10 324 platform. If more candidates from the same background and country will be suggested, we will invite  
11 325 all candidates to increase the likelihood of achieving the planned sample size. If the expressed interest  
12 326 exceeds the planned sample size, purposeful sampling will be performed to ensure variation in  
13 327 expertise, country, and balance other characteristics (e.g., years of expertise, gender). To reach simple  
14 328 size and variation in sample characteristics, key international organizations from the field (e.g.,  
15 329 ESPACOMP, PCNE, ESCP, WONCA, EMA, EPF, EARTO, EuroDURG etc.) will be contacted to fill any  
16 330 missing gaps, if needed.  
17  
18  
19  
20  
21  
22  
23  
24  
25  
26  
27

331

## 332 Patient and Public Involvement

333 The goal of this Delphi consultation is to involve stakeholders (patient representatives among them)  
334 in decisions regarding the development of ENABLE repository and is part of the broader approach to  
335 Patient and Public Involvement followed in the ENABLE Action. Results will be communicated to all  
336 stakeholders, and they will be listed and acknowledged among ENABLE collaborators.  
337

337

## 338 Data collection

339 We will use an online platform, eDelphi.org (Metodix Ltd, Helsinki, Finland<sup>75</sup>), for data collection. All  
340 survey activities - distribution, reminders, communication with and between the panellists and interim  
341 analysis of the process will be performed through the tool. The survey will be conducted from 1<sup>st</sup>  
342 October 2021 to 15<sup>th</sup> January 2022 in three stages:

- 343 1. **Pilot stage** - at least 10 members of the COST ENABLE Action, specifically members of the WG2,  
344 will be asked to test the survey (including instructions for participants) and to provide feedback on  
345 face validity as well as user experience.
- 346 2. **First stage phase** – invitation of 20 purposefully selected stakeholders (aiming for variation in  
347 expertise, geographical location, and gender) to create initial aggregated feedback of the RT-  
348 Delphi.
- 349 3. **Full scale RT-Delphi** - all remaining stakeholders will be invited to participate in the study.

350



1  
2  
3 351 Stakeholders will receive an email invitation via the eDelphi platform with a personalized link to the  
4  
5 352 survey. Detailed instructions describing survey aims, rules of engagement and how to use the platform  
6  
7 353 will be available on the platform.

8 354 At the beginning of the survey, participants will be encouraged to think of a hypothetical situation in  
9  
10 355 which they would search for MATech applicable to their own setting/role and to assess the proposed  
11  
12 356 attributes from this perspective throughout the survey. First, panellists will be asked to familiarize with  
13  
14 357 the proposed structure and provide general feedback on the completeness. Further, they will be asked  
15  
16 358 to rate **agreement** with and **clarity** of the MATech definition and **relevance and clarity** of each  
17  
18 359 proposed attribute group on a 9-points Likert scale, where 1 represents extremely irrelevant/unclear  
19  
20 360 and 9 represents extremely relevant/clear. We will use the Live 2D format<sup>75</sup>, where each outcome  
21  
22 361 represents one of the two dimensions; i.e., the x axis stands for relevance and the y axis stands for  
23  
24 362 clarity. Additionally, an open text field will be provided for panellists to comment on completeness of  
25  
26 363 each attribute group, i.e., proposing additional attributes or revising definitions. We will moderate the  
27  
28 364 discussion in the following ways: (i) address technical issues with the platform by responding to the  
29  
30 365 comment when the issues will be solved or provide instructions how to manage the issue and (ii)  
31  
32 366 outline the progress of the study and the most commented questions in bulletins send through the  
33  
34 367 platform once a week. We considered these strategies to encourage panellists to participate, taking  
35  
36 368 into account the length of the survey and the complexity of the concepts they are rating. Delphi survey  
37  
38 369 materials (Supplementary file 3. - Information letter, Supplementary file 4. - Summary of the Delphi  
39  
40 370 survey and Supplementary file 5. – GDPR statement), including all attributes' labels and definitions  
41  
42 371 (Supplementary file 1. and Supplementary file 2.) as well as participant instructions (Supplementary  
43  
44 372 file 6.), are shown in the Supplementary Materials.

45  
46 373  
47  
48 374 For sample description purposes, participants will be requested to provide information on their  
49  
50 375 expertise (profession, years of experience, relevant professional experiences) and demographic  
51  
52 376 characteristics (age, gender, country of practice). This information will also be used to examine  
53  
54 377 differences in participants' ratings and comments depending on their background and location. These  
55  
56 378 data will be presented in aggregated form and not linked to the individual's activity or answers. Re-  
57  
58 379 visiting and re-rating will be encouraged by weekly reminders.

59  
60 380  
61  
62 381 Data collection will be stopped upon reaching adequate sample size and characteristics to achieve  
63  
64 382 sufficient representability and generalizability of the opinions gathered. Therefore, we propose  
65  
66 383 stopping the Delphi, when 3 criteria will be met: (i) the total response rate to the survey is  $\geq 30\%$   
67  
68 384 (number of participants completing the survey, of the total number of stakeholders invited)<sup>76</sup>; (ii) a  
69  
70 385 minimum of 10 panellists in each stakeholder group completed the survey; (iii) a minimum of 1

1  
2  
3 386 stakeholder from at least 2/3 of the COST ENABLE countries has completed the survey. We will  
4  
5 387 operationalize survey completion as providing background data and answering at least 75% of the  
6  
7 388 repository structure questions.

8 389

## 10 390 Data analysis

11  
12 391 Descriptive statistics will be used to characterize the sample of panellists and each stakeholder  
13  
14 392 subgroup regarding profession, years of experience, age, gender and country.

15 393 Several measures can be used to determine when consensus is reached, with the percentage of  
16  
17 394 agreement being the most common.<sup>77</sup> Pre-specification of the consensus measure and criteria for  
18  
19 395 consensus increases trustworthiness of findings.<sup>78</sup>

### 21 396 Level of agreement on relevance, clarity and completeness

22  
23 397 Stakeholder agreement on the proposed definition and attributes will guide decisions on the  
24  
25 398 repository structure. Therefore, we selected a set of criteria representing different levels of agreement  
26  
27 399 and consequently carrying different weights in these decisions. The level of agreement on every  
28  
29 400 attribute for both outcomes (e.g., relevance and clarity) will be quantified using the Interpercentile  
30  
31 401 Range Adjusted for Symmetry (IPRAS) analysis technique from the RAND/UCLA Appropriateness  
32  
33 402 Method (RAM).<sup>79</sup> Firstly, the disagreement index (DI) will be calculated as a ratio between the  
34  
35 403 Interpercentile Range (IPR) and IPRAS. A DI > 1 (i.e., IPR > IPRAS) indicates disagreement exists. IPR is  
36  
37 404 calculated using the 30th to 70th percentile. IPRAS for the 9-points Likert scale is calculated according  
38  
39 405 to the formula presented in the RAM User Manual.<sup>79</sup>

40  
41 406 Secondly, the median and DI will define different levels of agreement and steer the decisions about  
42  
43 407 the repository structure. For the relevance:

- 44 408 i. items with the median of 7-9 and no disagreement will be considered as *relevant and mandatory*.
- 45 409 ii. items with the median of 4-6 or disagreement will be considered as *optional*.
- 46 410 iii. items with the median of 1-3 and no disagreement, will be considered *not relevant* and candidates  
47 411 for *exclusion*.

48  
49 412 For an even number of participants, median ratings of e.g., 6.5 or 3.5 will be assigned to the higher  
50  
51 413 level.<sup>79</sup> Stakeholders' responses per question will be summarized using descriptive statistics.

52 414 For clarity ratings, the above criteria will be applied as (i) sufficiently clear to remain unchanged; (ii)  
53  
54 415 optional changes and (iii) candidates for rephrasing.

55 416 Panellist comments in the open text fields will be analysed qualitatively, using content analysis.

56  
57 417 Findings will be used to rephrase and improve clarity of certain attributes or to add additional  
58  
59 418 attributes proposed by stakeholders.

### 419 Subgroup analysis

420 Following the primary analysis on the whole sample, a subgroup analysis per stakeholder group will be  
 421 conducted to examine variation in opinions and potential differences among subgroups. The same  
 422 agreement criteria will be applied and descriptive statistics will be stratified by stakeholder group. In  
 423 addition, we will determine the reliability of ratings per question within stakeholder group by  
 424 calculating the *intraclass correlation coefficient (ICC)*. The ICC calculation is based on the two-way  
 425 random model, considering type (average measures) and definition of relationship (consistency) and  
 426 is presented in Equation 1. ICC > 0.70 will indicate moderate to good reliability.<sup>80 81</sup>

427 *Equation 1. Calculation of the intraclass correlation coefficient (ICC), expressed in %. MS<sub>R</sub> stands for*  
 428 *mean square for rows and MS<sub>E</sub> stands for mean square for error.*

$$429 \quad ICC = \frac{MS_R - MS_E}{MS_R} \times 100 \text{ [%]}$$

### 431 Analysis of process indicators

432 By analysing process data from the online tool, we will describe in more detail how stakeholders'  
 433 responses evolved through iterations and how consensus or certain level of agreement has formed.<sup>25</sup>  
 434 <sup>82</sup>

435 **Stability of response** presents the consistency of responses within the study period and between  
 436 respondent group stability, which is considered a necessary precondition for determining the level of  
 437 agreement or if consensus was achieved.<sup>83-85</sup> Different measures of dispersion (e.g., median,  
 438 interquartile range) and statistical approaches (e.g. descriptive, inferential) can be used <sup>74 85</sup> to  
 439 measure stability, which can be calculated between rounds (traditional Delphi) or at the end of the  
 440 study (RT-Delphi).<sup>71 74</sup>

441 We will use the *coefficient of quartile variation (CQV)* as a descriptive measure of response stability.  
 442 CQV will be calculated over all participants (CQV<sub>total</sub>) and within the same stakeholder group (CQV<sub>sub</sub>)  
 443 to account for expected higher variation in response between different stakeholder groups. A CQV<sub>total</sub> <  
 444 30% and CQV<sub>sub</sub> < 15% will be considered as stable response. CQV calculation is shown in *Equation 2*.  
 445 <sup>84 86</sup>

446 *Equation 2. Calculation of the coefficient of quartile variation (CQV), expressed in %. Q3 stands for value*  
 447 *of the 3<sup>rd</sup> quartile and Q1 for 1<sup>st</sup> quartile.*

$$448 \quad CQV = \frac{Q3 - Q1}{Q3 + Q1} \times 100 \text{ [%]}$$

1  
2  
3 449  
4  
5

## 450 **Final repository structure**

451 After conducting the analyses described above (planned to be finalized at the end of April 2022),  
452 results suggesting modifications to the proposed structure will be considered for adoption by the  
453 Steering Committee in a subsequent version, which will represent the final structure of the ENABLE  
454 repository implemented on the initial ENABLE repository version. Further work will be considered to  
455 address results that might suggest ongoing debates in the field about certain attribute groups or the  
456 need for more in-depth consultation and evidence generation. This work will accompany the iterative  
457 improvement of the repository during the ENABLE Action.

## 458 **Ethics and dissemination**

### 459 **Ethical considerations and consent to publish**

460 The study is designed to ensure participants' anonymity and to manage personal data in line with EU  
461 regulation. Before starting the survey, every participant will provide an informed consent electronically  
462 on the study entry page. Participants will be asked to carefully read through the statement regarding  
463 the study aim and nature as well as the data handling procedures and to mark their understanding and  
464 agreement. The results will only be published in an aggregated form and no personal details will be  
465 revealed.

466 An ethical approval for the activities of the COST ENABLE Action, including this Delphi study, was  
467 granted by the Malaga Regional Research Ethics Committee ("Comite de Etica de la Investigacion  
468 Provincial de Malaga") on 29th April 2021 (Supplementary file 7.). In addition, a data protection  
469 assessment was carried out by the Data Protection Officer at the University of Basel. According to this  
470 instance the Delphi study protocol was determined as compliant regarding data protection and  
471 security (Supplementary file 8.).

472

### 473 **Future implications and challenges**

474 The proposed scope and framework of attributes together with findings from this Delphi study will  
475 represent the first steps on the pathway to create an evidence-based, interoperable and user-friendly  
476 MATEch repository. Following the Delphi consultation and integration of the repository module on the  
477 ENABLE website<sup>87</sup>, providers of MATEch (public or private) would be invited to upload information on  
478 their products via a MATEch description form based on the final repository structure. The accuracy of  
479 the information would be verified by an independent review panel through a procedure yet to be  
480 established. Important challenges lay ahead, such as how to select MATEch for inclusion in the

1  
2  
3 481 repository given the broad scope of the definitions proposed, how to ensure accurate information  
4  
5 482 about the technologies included, how to provide the information in other languages than English and  
6  
7 483 in non-technical language accessible for all, and how to maintain a representative and varied offer of  
8  
9 484 technologies in the long term. Nevertheless, the ENABLE repository promises to bring together  
10  
11 485 stakeholders from different backgrounds to build a common language which can have an important  
12  
13 486 positive impact on medication adherence research and practice.  
14

15

## 488 Dissemination

16  
17 489 The repository will be publicly accessible for interested parties. The use of the repository will be  
18  
19 490 promoted and supported by dissemination meetings, workshops, and training schools. The findings of  
20  
21 491 the study will be presented via publications (reports and manuscripts in open access peer-reviewed  
22  
23 492 journals) and oral presentations to different stakeholders in conferences and meetings. The spirit of  
24  
25 493 COST Actions is networking and dissemination of ideas; hence the action is open for anybody who  
26  
27 494 would wish to join or would like to be informed about its activities.  
28

29

## 496 Acknowledgement

30  
31  
32 497 The authors would like to thank the ENABLE members for their feedback on the development of the  
33  
34 498 ENABLE repository and early versions of this work, and the ENABLE Core Team for leadership and  
35  
36 499 coordination of ENABLE activities, of which this work is part of.  
37

## 500 Authors contribution statement

38  
39  
40 501 All authors contributed to the work and formation of this manuscript. The first draft was prepared by  
41  
42 502 UNM, CG, JR and ALD. All other members of the steering committee (PBF, FH, MTH, CJ, FR, DS, and IT)  
43  
44 503 reviewed and upgraded the first version. All steering committee members (CG, JR, PBF, FH, MTH, CJ,  
45  
46 504 FR, DS, IT) worked on development of the scope and framework of the attribute groups, UNM and ALD  
47  
48 505 coordinated the work. SPG was consulted as the expert in Delphi methodology, specifically the  
49  
50 506 RAND/UCLA Appropriateness Method. The final version of the protocol was prepared by UNM and  
51  
52 507 reviewed by all other authors (CG, JR, PBF, SPG, FH, MTH, CJ, FR, DS, IT, ALD). All authors have read  
53  
54 508 and approve the final version of the manuscript.  
55

## 509 Competing interests

56  
57 510 SPG is a research team member for ExpertLens (an online platform and methodology for conducting  
58  
59 511 modified-Delphi studies). SG's spouse is a salaried employee of, and owns stock in, Eli Lilly and  
60  
512 Company.

1  
2  
3 513 All other authors declare no conflict of interests.  
4  
5

## 6 514 Funding

7  
8 515 This work was supported by COST Action ENABLE - European Network to Advance Best practices &  
9  
10 516 technoLogY on medication adherence', number CA19132. Funders had no role in the study design,  
11 517 content work and preparation or writing of the manuscript.

12  
13 518 CG was supported by a PhD grant financed by the Action LIONS Vaincre le Cancer.

14  
15 519 The work of IT was partially supported by the Ministry of Education, Science and Technological  
16 520 Development of the Republic of Serbia (project No. 451-03-9/2021-14/200161).

17  
18 521 ALD was supported by an IDEXLYON grant (16-IDEX-0005; 2018-2021) during the preparation of this  
19  
20 522 manuscript.

## 21 22 523 Data sharing statement

23  
24 524 Documents detailing the development of the present protocol and the data collection planned are  
25  
26 525 shared as supplementary materials. The data, analyses and results of this study will be shared in open  
27  
28 526 access according to the COST open access policy.

## 29 30 527 Supplementary materials

31  
32 528 **Supplementary file 1.** Medication Adherence Technology tree as an interactive feature (graphical  
33  
34 529 representation of the proposed structure).

35  
36 530 **Supplementary file 2.** Medication Adherence Technology tree in Excel (outlining the whole proposed  
37  
38 531 structure with corresponding labels and definitions).

39 532 **Supplementary file 3.** Delphi information letter to participants

40 533 **Supplementary file 4.** Summary of the Delphi survey

41 534 **Supplementary file 5.** General data protection statement used in the Delphi survey

42 535 **Supplementary file 6.** Instructions for Delphi participants

43 536 **Supplementary file 7.** Ethical approval by Malaga Regional Research Ethics Committee

44 537 **Supplementary file 8.** Data protection assessment by the Data Protection Officer at the University of  
45  
46 538 Basel

## 47 48 539 References

49  
50  
51  
52 540 1. Vrijens B, De Geest S, Hughes DA, et al. A new taxonomy for describing and defining adherence to  
53  
54 541 medications. *Br J Clin Pharmacol* 2012;73(5):691-705. doi: 10.1111/j.1365-2125.2012. 04167.x  
55  
56 542 [published Online First: 2012/04/11]

- 1  
2  
3 543 2. Sabate E. Adherence to long-term therapies: evidence for action. Geneva: World Health  
4 544 Organization., 2003.
- 5  
6 545 3. Osterberg L, Blaschke T. Adherence to medication. *N Engl J Med* 2005;353(5):487-97. doi:  
7 546 10.1056/NEJMra050100 [published Online First: 2005/08/05]
- 8  
9 547 4. Ruddy K, Mayer E, Partridge A. Patient adherence and persistence with oral anticancer treatment.  
10 548 *CA: A Cancer Journal for Clinicians* 2009;59(1):56-66. doi: <https://doi.org/10.3322/caac.20004>
- 11  
12 549 5. MEDI-VOICE Project. A Low Cost, Environmentally Friendly, Smart Packaging Technology to  
13 550 Differentiate European SME Suppliers to Service the Needs of the Blind, Illiterate and Europe's Aging  
14 551 Population.: MEDI-VOICE (Project No. FP6-017893), 2008.
- 15  
16 552 6. Ahmed I, Ahmad NS, Ali S, et al. Medication Adherence Apps: Review and Content Analysis. *JMIR*  
17 553 *Mhealth Uhealth* 2018;6(3): e62. doi: 10.2196/mhealth.6432 [published Online First: 2018/03/20]
- 18  
19 554 7. Clyne W, McLachlan S. A mixed-methods study of the implementation of medication adherence  
20 555 policy solutions: how do European countries compare? *Patient Prefer Adherence* 2015; 9:1505-15. doi:  
21 556 10.2147/ppa.S85408 [published Online First: 2015/11/26]
- 22  
23 557 8. van Boven JF, Tsiligianni I, Potočnjak I, et al. European Network to Advance Best Practices and  
24 558 Technology on Medication Adherence: Mission Statement. *Frontiers in Pharmacology* 2021;12(2620)  
25 559 doi: 10.3389/fphar.2021.748702
- 26  
27 560 9. Costello RW DA, Ryan D, McIvor RA, Boycott K, Chisholm A, Price D, Blakey JD. Effective deployment  
28 561 of technology-supported management of chronic respiratory conditions: a call for stakeholder  
29 562 engagement. *Pragmat Obs Res* 2017; 8:119-28. doi: <https://doi.org/10.2147/POR.S132316>
- 30  
31 563 10. NHS Apps Library, National Health Service, United Kingdom [Available from:  
32 564 <https://www.nhs.uk/apps-library/> accessed 01-07-2021 2021.
- 33  
34 565 11. My Health Apps: Patient View; 2021 [Available from: <https://myhealthapps.net/> accessed 01-07-  
35 566 2021.
- 36  
37 567 12. InterventieNet; Nederland [Available from: <https://interventienet.nl/> accessed 01-07-2021.
- 38  
39 568 13. GGD AppStore: GGD GHOR Nederland; [Available from:  
40 569 <https://www.ggdappstore.nl/Appstore/Homepage/Sessie,Medewerker,Button> accessed 01-07-2021.
- 41  
42 570 14. DIGA: Federal Institute for Drugs and Medical Devices, Germany [Available from:  
43 571 <https://diga.bfarm.de/de> accessed 01-07-2021.
- 44  
45 572 15. Weisse Liste, Germany [Available from: <https://www.trustedhealthapps.org/de> accessed 01-07-  
46 573 2021.
- 47  
48 574 16. Bansal A, Iqbal Khan, J., Kaiser Alam, S. Introduction to Computational Health Informatics. 1st ed:  
49 575 Chapman and Hall/CRC 2020.
- 50  
51 576 17. Liyanage H, Krause P, de Lusignan S. Using ontologies to improve semantic interoperability in health  
52 577 data. *BMJ Health & Care Informatics* 2015;22(2):309-15. doi: 10.14236/jhi.v22i2.159



- 1  
2  
3 578 18. WHO. International Statistical Classification of Diseases and Related Health Problems (ICD-11):  
4 579 World Health Organization (WHO), 2021.  
5  
6 580 19. Human Behaviour Change Project. The Behaviour Change Intervention Ontology. Ontology Lookup  
7 581 Service (OLS), 2021.20. Malone Jea, ed. A new Ontology Lookup Service at EMBL-EBI. Proceedings of  
8 582 SWAT4LS International Conference; 2015 01-07-2021.  
9  
10 583 21. WHO. Classification of digital health interventions v1.0 (DHI): World Health Organisation (WHO),  
11 584 2018.  
12  
13 585 22. Norris E, Hastings J, Marques MM, et al. Why and how to engage expert stakeholders in ontology  
14 586 development: insights from social and behavioural sciences. *J Biomed Semantics* 2021;12(1):4. doi:  
15 587 10.1186/s13326-021-00240-6 [published Online First: 2021/03/25]  
16  
17 588 23. Geist MR. Using the Delphi method to engage stakeholders: A comparison of two studies.  
18 589 *Evaluation and Program Planning* 2010;33(2):147-54. doi:  
19 590 <https://doi.org/10.1016/j.evalprogplan.2009.06.006>  
20  
21 591 24. Wright A, Norris E, Finnerty AN, Marques MM, Johnston M, Kelly MP, Hastings J, West R, Michie S.  
22 592 Ontologies relevant to behaviour change interventions: a method for their development [version 3;  
23 593 peer review: 2 approved, 1 approved with reservations]. *Wellcome Open Res* 2020;5(126) doi:  
24 594 <https://doi.org/10.12688/wellcomeopenres.15908.3>  
25  
26 595 25. Khodyakov D, Savitsky TD, Dalal S. Collaborative learning framework for online stakeholder  
27 596 engagement. *Health Expectations* 2016;19(4):868-82. doi: <https://doi.org/10.1111/hex.12383>  
28  
29 597 26. Health Technologies. 60th World Health Assembly; 2007; Geneva, Switzerland.  
30  
31 598 27. Perleth M, Jakubowski E, Busse R. What is 'best practice' in health care? State of the art and  
32 599 perspectives in improving the effectiveness and efficiency of the European health care systems. *Health*  
33 600 *Policy* 2001;56(3):235-50. doi: 10.1016/s0168-8510(00)00138-x [published Online First: 2001/06/12]  
34  
35 601 28. Michie S, Wood CE, Johnston M, et al. Behaviour change techniques: the development and  
36 602 evaluation of a taxonomic method for reporting and describing behaviour change interventions (a suite  
37 603 of five studies involving consensus methods, randomised controlled trials and analysis of qualitative  
38 604 data). *Health Technol Assess* 2015;19(99):1-188. doi: 10.3310/hta19990 [published Online First:  
39 605 2015/12/01]  
40  
41 606 29. Damschroder LJ, Aron DC, Keith RE, et al. Fostering implementation of health services research  
42 607 findings into practice: a consolidated framework for advancing implementation science. *Implement Sci*  
43 608 2009; 4:50. doi: 10.1186/1748-5908-4-50 [published Online First: 2009/08/12]  
44  
45 609 30. Glasgow RE, Harden SM, Gaglio B, et al. RE-AIM Planning and Evaluation Framework: Adapting to  
46 610 New Science and Practice With a 20-Year Review. *Front Public Health* 2019; 7:64-64. doi:  
47 611 10.3389/fpubh.2019.00064  
48  
49  
50  
51  
52  
53  
54  
55  
56  
57  
58  
59  
60



- 1  
2  
3 612 31. WHO. International Classification of Health Interventions (ICHI): World Health Organization (WHO),  
4 613 2021.  
5  
6 614 32. SNOMED International. SNOMED Clinical Terminology: SNOMED International; [Available from:  
7 615 <https://www.snomed.org/snomed-ct/why-snomed-ct> accessed 01-07-2021.  
8  
9 616 33. Goetzinger C et al. Ehealth technologies to improve medication adherence in patients with chronic  
10 617 diseases: a systematic review. PROSPERO - International prospective register of systematic reviews,  
11 618 2019.  
12  
13 619 34. Ribaut J et al. Development of an evaluation tool to assess and evaluate the characteristics and  
14 620 quality of eHealth applications: a systematic review and consensus finding: PROSPERO - International  
15 621 prospective register of systematic reviews, 2021.  
16  
17 622 35. Donabedian A. Evaluating the quality of medical care. 1966. *Milbank Q* 2005;83(4):691-729. doi:  
18 623 10.1111/j.1468-0009.2005.00397.x [published Online First: 2005/11/11]  
19  
20 624 36. Moreno-Conde A, Parra-Calderón CL, Sánchez-Seda S, et al. ITEMAS ontology for healthcare  
21 625 technology innovation. *Health Research Policy and Systems* 2019;17(1):47. doi: 10.1186/s12961-019-  
22 626 0453-y  
23  
24 627 37. WHO. International Classification of Functioning, Disability and Health (ICF): World Health  
25 628 Organisation (WHO), 2001.  
26  
27 629 38. UKCRC Health Research Analysis Forum UK Health Research Classification System (UKHRCS) -  
28 630 Health Categories; United Kingdom, 2021 [Available from: <https://hrcsonline.net/health-categories/>  
29 631 accessed 01-07-2021.  
30  
31 632 39. National Cancer Institute Thesaurus (NCIT), Cancer Biomedical Informatics Grid, Unified Medical  
32 633 Language System, 2021.  
33  
34 634 40. MeSH. Medical Subject Headings (MeSH): US National Library of Medicine (NIH), 2021.  
35  
36 635 41. Nieuwlaat R, Wilczynski N, Navarro T, et al. Interventions for enhancing medication adherence.  
37 636 *Cochrane Database of Systematic Reviews* 2014(11) doi: 10.1002/14651858.CD000011.pub4  
38  
39 637 42. Guerreiro MP, Strawbridge J, Cavaco AM, et al. Development of a European competency  
40 638 framework for health and other professionals to support behaviour change in persons self-managing  
41 639 chronic disease. *BMC Medical Education* 2021;21(1):287. doi: 10.1186/s12909-021-02720-w  
42  
43 640 43. Cross AJ, Elliott RA, Petrie K, et al. Interventions for improving medication-taking ability and  
44 641 adherence in older adults prescribed multiple medications. *Cochrane Database of Systematic Reviews*  
45 642 2020(5) doi: 10.1002/14651858.CD012419.pub2  
46  
47 643 44. Levy H, Janke AT, Langa KM. Health Literacy and the Digital Divide Among Older Americans. *Journal*  
48 644 *of General Internal Medicine* 2015;30(3):284-89. doi: 10.1007/s11606-014-3069-5  
49  
50  
51  
52  
53  
54  
55  
56  
57  
58  
59  
60

- 1  
2  
3 645 45. Carey R, Jenkins, E., Williams, P., Evans, F., Horan, M., Johnston, M., West, R., Michie, S. A taxonomy  
4 646 of modes of delivery of behaviour change interventions: European Health Psychology Society  
5 647 Conference. Padova, Italy: European Health Psychology Society (EHPS), 2017.  
6  
7 648 46. Kardas P, Lewek P, Matyjaszczyk M. Determinants of patient adherence: a review of systematic  
8 649 reviews. *Front Pharmacol* 2013; 4:91. doi: 10.3389/fphar.2013.00091 [published Online First:  
9 650 2013/07/31]  
10 651 47. Michie S, van Stralen MM, West R. The behaviour change wheel: A new method for characterising  
11 652 and designing behaviour change interventions. *Implementation Science* 2011;6(1):42. doi:  
12 653 10.1186/1748-5908-6-42  
13 654 48. Cane J, O'Connor D, Michie S. Validation of the theoretical domains framework for use in behaviour  
14 655 change and implementation research. *Implementation Science* 2012;7(1):37. doi: 10.1186/1748-5908-  
15 656 7-37  
16 657 49. Carey RN, Connell LE, Johnston M, et al. Behavior Change Techniques and Their Mechanisms of  
17 658 Action: A Synthesis of Links Described in Published Intervention Literature. *Annals of Behavioral*  
18 659 *Medicine* 2018;53(8):693-707. doi: 10.1093/abm/kay078  
19 660 50. Schenk PM, Michie, S., West, R., Hastings, J., Lorencatto, F., Moore, C., Hayes, E., Wright, A.  
20 661 Mechanism of Action Ontology v1: OSF, 2021.  
21 662 51. Michie S, Richardson M, Johnston M, et al. The behavior change technique taxonomy (v1) of 93  
22 663 hierarchically clustered techniques: building an international consensus for the reporting of behavior  
23 664 change interventions. *Ann Behav Med* 2013;46(1):81-95. doi: 10.1007/s12160-013-9486-6 [published  
24 665 Online First: 2013/03/21]  
25 666 52. Pearson E, Byrne-Davis L, Bull E, et al. Behavior change techniques in health professional training:  
26 667 developing a coding tool. *Translational Behavioral Medicine* 2018;10(1):96-102. doi:  
27 668 10.1093/tbm/iby125  
28 669 53. Byrne-Davis L, Bull, E., Hart, J. Cards for Change: Manchester Implementation Science Collaboration  
29 670 (MCRIMPSCI), 2019.  
30 671 54. Conn VS, Ruppert TM, Enriquez M, et al. Healthcare provider targeted interventions to improve  
31 672 medication adherence: systematic review and meta-analysis. *International Journal of Clinical Practice*  
32 673 2015;69(8):889-99. doi: <https://doi.org/10.1111/ijcp.12632>  
33 674 55. Norris E, Wright, A., et al. Development of an Intervention Source Ontology: Specifying who delivers  
34 675 behaviour change interventions.  
35 676 56. Kronk CA, Dexheimer JW. Development of the Gender, Sex, and Sexual Orientation ontology:  
36 677 Evaluation and workflow. *Journal of the American Medical Informatics Association* 2020;27(7):1110-  
37 678 15. doi: 10.1093/jamia/ocaa061  
38  
39  
40  
41  
42  
43  
44  
45  
46  
47  
48  
49  
50  
51  
52  
53  
54  
55  
56  
57  
58  
59  
60

- 1  
2  
3 679 57. Norris E, Marques et al. Development of a Setting Ontology for behaviour change interventions:  
4 680 Specifying where interventions take place, 2021.  
5  
6 681 58. Campbell SM, Braspenning J, Hutchinson A, et al. Research methods used in developing and  
7  
8 682 applying quality indicators in primary care. *Qual Saf Health Care* 2002;11(4):358-64. doi:  
9  
10 683 10.1136/qhc.11.4.358 [published Online First: 2002/12/07]  
11  
12 684 59. Stoyanov SR, Hides L, Kavanagh DJ, et al. Mobile app rating scale: a new tool for assessing the  
13  
14 685 quality of health mobile apps. *JMIR Mhealth Uhealth* 2015;3(1): e27. doi: 10.2196/mhealth.3422  
15 686 [published Online First: 2015/03/12]  
16  
17 687 60. Eysenbach G. CONSORT-EHEALTH: improving and standardizing evaluation reports of Web-based  
18  
19 688 and mobile health interventions. *J Med Internet Res* 2011;13(4): e126. doi: 10.2196/jmir.1923  
20 689 [published Online First: 2012/01/03]  
21  
22 690 61. European Network for Health Technology Assessment (EUnetHTA Joint). EUnetHTA Joint Action 2  
23  
24 691 WP. HTA Core Model<sup>®</sup> version 3.0 (Pdf), 2016.  
25  
26 692 62. O'Rourke B, Oortwijn W, Schuller T. The new definition of health technology assessment: A  
27  
28 693 milestone in international collaboration. *International Journal of Technology Assessment in Health*  
29  
30 694 *Care* 2020;36(3):187-90. doi: 10.1017/S0266462320000215 [published Online First: 2020/05/13]  
31  
32 695 63. Zullig LL, Deschodt M, Liska J, et al. Moving from the Trial to the Real World: Improving Medication  
33  
34 696 Adherence Using Insights of Implementation Science. *Annual Review of Pharmacology and Toxicology*  
35  
36 697 2019;59(1):423-45. doi: 10.1146/annurev-pharmtox-010818-021348  
37  
38 698 64. Proctor E, Silmere H, Raghavan R, et al. Outcomes for implementation research: conceptual  
39  
40 699 distinctions, measurement challenges, and research agenda. *Adm Policy Ment Health* 2011;38(2):65-  
41  
42 700 76. doi: 10.1007/s10488-010-0319-7 [published Online First: 2010/10/20]  
43  
44 701 65. Powell BJ, Waltz TJ, Chinman MJ, et al. A refined compilation of implementation strategies: results  
45  
46 702 from the Expert Recommendations for Implementing Change (ERIC) project. *Implementation Science*  
47  
48 703 2015;10(1):21. doi: 10.1186/s13012-015-0209-1  
49  
50 704 66. Iqbal S, Pison-Young, L. The Delphi method: a step-by-step guide. *The Psychologist* 2009;22(7):598-  
51  
52 705 601.  
53  
54 706 67. Okoli C, Pawlowski SD. The Delphi method as a research tool: an example, design considerations  
55  
56 707 and applications. *Information & Management* 2004;42(1):15-29. doi: 10.1016/j.im.2003.11.002  
57  
58 708 68. Rowe G WG, Bolger F. Delphi: A Reevaluation of Research and Theory. *Technological Forecasting*  
59  
60 709 *and Social Change* 1991; 39:235-51.  
61  
62 710 69. Gordon T, Pease A. RT Delphi: An efficient, "round-less" almost real time Delphi method.  
63  
64 711 *Technological Forecasting and Social Change* 2006;73(4):321-33. doi:  
65  
66 712 <https://doi.org/10.1016/j.techfore.2005.09.005>

- 1  
2  
3 713 70. Aengenheyster S, Cuhls, K., Gerhold, L., Heiskanen-Schüttler, M., Huck, J., Muszynska, M. Real-Time  
4 714 Delphi in practice — A comparative analysis of existing software-based tools. *Technological*  
5 715 *Forecasting and Social Change* 2017; 118:15-27. doi: <https://doi.org/10.1016/j.techfore.2017.01.023>  
6  
7 716 71. Gnatzy T, Warth J, von der Gracht H, et al. Validating an innovative real-time Delphi approach - A  
8 717 methodological comparison between real-time and conventional Delphi studies. *Technological*  
9 718 *Forecasting and Social Change* 2011;78(9):1681-94. doi:  
10 719 <https://doi.org/10.1016/j.techfore.2011.04.006>  
11  
12 720 72. Quirke FA, Healy P, Bhraonáin EN, et al. Multi-Round compared to Real-Time Delphi for consensus  
13 721 in core outcome set (COS) development: a randomised trial. *Trials* 2021;22(1):142. doi:  
14 722 [10.1186/s13063-021-05074-2](https://doi.org/10.1186/s13063-021-05074-2)  
15  
16 723 73. Thiebes S, Scheidt D, Schmidt-Kraepelin M, et al. Paving the Way for Real-Time Delphi in  
17 724 Information Systems Research: A Synthesis of Survey Instrument Designs and Feedback  
18 725 Mechanisms2018.  
19  
20 726 74. Varndell W, Fry M, Elliott D. Applying real-time Delphi methods: development of a pain  
21 727 management survey in emergency nursing. *BMC Nursing* 2021;20(1):149. doi: [10.1186/s12912-021-](https://doi.org/10.1186/s12912-021-00661-9)  
22 728 [00661-9](https://doi.org/10.1186/s12912-021-00661-9)  
23  
24 729 75. eDelphi.org - Delphi Method Software [program]: Metodix Ltd, Helsinki, Finland, 2021.  
25  
26 730 76. Edwards PJ, Roberts I, Clarke MJ, et al. Methods to increase response to postal and electronic  
27 731 questionnaires. *Cochrane Database Syst Rev* 2009(3): Mr000008. doi:  
28 732 [10.1002/14651858.MR000008.pub4](https://doi.org/10.1002/14651858.MR000008.pub4) [published Online First: 2009/07/10]  
29  
30 733 77. Diamond IR, Grant RC, Feldman BM, et al. Defining consensus: A systematic review recommends  
31 734 methodologic criteria for reporting of Delphi studies. *Journal of Clinical Epidemiology* 2014;67(4):401-  
32 735 09. doi: [10.1016/j.jclinepi.2013.12.002](https://doi.org/10.1016/j.jclinepi.2013.12.002)  
33  
34 736 78. Grant S, Booth M, Khodyakov D. Lack of preregistered analysis plans allows unacceptable data  
35 737 mining for and selective reporting of consensus in Delphi studies. *Journal of Clinical Epidemiology* 2018;  
36 738 99:96-105. doi: <https://doi.org/10.1016/j.jclinepi.2018.03.007>  
37  
38 739 79. Fitch K, Bernstein SJ, Aguilar MD, et al. The RAND/UCLA Appropriateness Method User's Manual:  
39 740 RAND Corporation 2001.  
40  
41 741 80. Koo TK, Li MY. A Guideline of Selecting and Reporting Intraclass Correlation Coefficients for  
42 742 Reliability Research. *J Chiropr Med* 2016;15(2):155-63. doi: [10.1016/j.jcm.2016.02.012](https://doi.org/10.1016/j.jcm.2016.02.012) [published  
43 743 Online First: 2016/06/23]  
44  
45 744 81. McGraw K, Wong S. Forming inferences about some intraclass correlation coefficients.  
46 745 *Psychological Methods* 1996; 1:30-46.  
47  
48 746 82. Khodyakov D, Chen C. Nature and Predictors of Response Changes in Modified-Delphi Panels. *Value*  
49 747 *in Health* 2020;23(12):1630-38. doi: <https://doi.org/10.1016/j.jval.2020.08.2093>  
50  
51  
52  
53  
54  
55  
56  
57  
58  
59  
60

- 1  
2  
3 748 83. Dajani JS SM, Talley WK. Stability and agreement criteria for the termination of Delphi studies.  
4 749 *Technol Forecast Soc Chang* 1979; 13:83-90.  
5  
6 750 84. Scheibe M SM, Schofer J. Experiments in Delphi methodology. In: Linstone HA TM, ed. *The Delphi*  
7 751 *Method — Techniques and Applications: Addison-Wesley, Reading, 1975:262-87.*  
8  
9 752 85. von der Gracht HA. Consensus measurement in Delphi studies: Review and implications for future  
10 753 quality assurance. *Technological Forecasting and Social Change* 2012;79(8):1525-36. doi:  
11 754 <https://doi.org/10.1016/j.techfore.2012.04.013>  
12  
13 755 86. Trevelyan EG, Robinson PN. Delphi methodology in health research: how to do it? *European Journal*  
14 756 *of Integrative Medicine* 2015;7(4):423-28. doi: <https://doi.org/10.1016/j.eujim.2015.07.002>  
15  
16 757 87. COST Action ENABLE 2020-2023 [Available from: <https://enableadherence.eu/> accessed  
17 758 25.11.2021.  
18  
19  
20  
21  
22 759  
23  
24  
25  
26  
27  
28  
29  
30  
31  
32  
33  
34  
35  
36  
37  
38  
39  
40  
41  
42  
43  
44  
45  
46  
47  
48  
49  
50  
51  
52  
53  
54  
55  
56  
57  
58  
59  
60

1  
2  
3  
4  
5  
6  
7  
8  
9  
10  
11  
12  
13  
14  
15  
16  
17  
18  
19  
20  
21  
22  
23  
24  
25  
26  
27  
28  
29  
30  
31  
32  
33  
34  
35  
36  
37  
38  
39  
40  
41  
42  
43  
44  
45  
46  
47  
48  
49  
50  
51  
52  
53  
54  
55  
56  
57  
58  
59  
60

1  
2  
3  
4  
5  
6  
7  
8  
9  
10  
11  
12  
13  
14  
15  
16  
17  
18  
19  
20  
21  
22  
23  
24  
25  
26  
27  
28  
29  
30  
31  
32  
33  
34  
35  
36  
37  
38  
39  
40  
41  
42  
43  
44  
45  
46  
47  
48  
49  
50  
51  
52  
53  
54  
55  
56  
57  
58  
59  
60

## Presentation of the ENABLE repository framework of attributes

This document presents the framework of attributes developed for the ENABLE repository by the WG2 task force. ENABLE is a COST action aiming to enhance collaboration between stakeholders across Europe for adoption of best practice and technologies supporting medication adherence. To this end, ENABLE develops an online repository of medication adherence technologies. This repository will showcase a diverse range of technologies and describe them in detail so that repository users can search and select technologies that are most appropriate to their contexts and needs. Thus, the repository would need to include information relevant for this specific use.

Information about technologies can be coded/represented via a collection of various attributes. This coding is driven by a user perspective where a user (HCP, regulator, client/patient, researcher) will be willing to learn more about (or select) a technology based on their specific interests or needs, and therefore is looking for specific types of information where attributes of technologies correspond to attributes of the solutions envisaged by users. Attributes may apply to adherence-related goals, target user characteristics, health conditions, product characteristics, etc., each represented as distinct attribute groups. Such modular ("LEGO") approach allows describing a very diverse landscape of existing and future technologies.

The repository is supposed to include all potential attributes for all technologies so that they allow the descriptions of any medication adherence technology in detailed way to enable informed decision-making. The goal of the present work therefore is to create a framework of such attributes, each with their own unique labels (short names of attributes) and definitions (longer explanations of what the attributes refer to).

Once the repository is created using this framework of attributes, we will be able to describe and group available adherence technologies. If a new attribute is subsequently identified, it will be added to the list -as part of an existing attribute or by creating a new one- aiming to ensure the evolution of this repository with changes in the field, as well as backward compatibility.



1  
2  
3  
4  
5  
6  
7  
8  
9  
10  
11  
12  
13  
14  
15  
16  
17  
18  
19  
20  
21  
22  
23  
24  
25  
26  
27  
28  
29  
30  
31  
32  
33  
34  
35  
36  
37  
38  
39  
40  
41  
42  
43  
44  
45  
46  
47  
48  
49  
50  
51  
52  
53  
54  
55  
56  
57  
58  
59  
60

**Product & provider information** D1.1

**Medication adherence descriptors** D2.1

D2.2

D2.3

D2.4

D2.4.2.A

D2.4.2.B.1

D2.4.2.B.2

D2.4.2.B.3

D2.4.2.B.4

D2.4.2.B.5

**Evaluation & implementation** D3.1

D3.2

target use scenarios

target health conditions

medication regimen

medication adherence management components

Monitoring/measurement methods and tar

intervention modes of delivery

target behaviour determinants

behaviour change techniques

intervention providers

intervention settings

quality indicators

implementation indicators

Each entry in the ENABLE repository will refer to a unique product, which will be identified with a unique ID, provided by a unique organisation (manufacturer, developer) with its own unique ID and related metadata (e.g., date of entry, verification process, etc.) to present the identity of the described MATech and its provider.

The type of common adherence management activities that the technology is intended to be used for.

The type of diseases or health problems the technology is intended for.

The prescribed schematic form/therapeutic plan of medication therapy that the technology is intended for.

The type of procedures and time periods the technology facilitates to achieve the best use by patients of appropriately prescribed medicines.

What measurement methods are used and what is being measured (measurement targets).

The modes used to deliver the medication adherence intervention

Causal influences on medication adherence that can be modifiable (amenable to intervention with a medication adherence technology).

Options/activities included in the technology that aim to influence barriers and facilitators of medication adherence

Role played by a person who uses the technology to assist the patients in their self-management of medication adherence

The social and physical environment in which the technology is used to manage adherence to medication

Quality indicators are standardized, evidence-based, and measurable items for monitoring and evaluating the quality of healthcare performance.

Outcomes and strategies that help implement medication adherence measurement / intervention within its target setting

What product does the entry refer to, who provides it, who entered its description in the repository and when?

What use scenarios and types of users is the technology intended for?

Which health conditions could the technology be used for as part of adherence support?

What type of medication regimen(s) (treatment intention, route of administration, number of medications, and recommended dosing) is the technology intended for?

What adherence management types and phases does the technology target?

If measurement is a component, what measurement methods does the technology use and what do they measure?

If intervention is a component, how is it delivered to its users?

If intervention is a component, what reasons for non-adherence can the technology help address?

If intervention is a component, what are the 'active ingredients' present in the technology that may trigger change in the reasons for non-adherence targeted?

If intervention is a component, who delivers the intervention to users?

If intervention is a component, where is the service for improving adherence delivered?

How does the technology meet key quality indicators from different perspectives?

What implementation outcomes and strategies are needed and available for adopting this technology in the intended setting?

1  
2  
3  
4  
5  
6  
7  
8  
9  
10  
11  
12  
13  
14  
15  
16  
17  
18  
19  
20  
21  
22  
23  
24  
25  
26  
27  
28  
29  
30  
31  
32  
33  
34  
35  
36  
37  
38  
39  
40  
41  
42  
43  
44  
45  
46

| Upper Level           | Sub-Level 1                 | Sub-level 2                               |
|-----------------------|-----------------------------|-------------------------------------------|
| Product               |                             |                                           |
|                       | Product ID                  |                                           |
|                       | Product Name                |                                           |
|                       | Brief product description   |                                           |
|                       | Date of release             |                                           |
|                       | Date of most recent update  |                                           |
|                       | Product type                |                                           |
|                       |                             | Hardware                                  |
|                       |                             | Software                                  |
|                       |                             | Service                                   |
|                       |                             | Material                                  |
|                       | Product Brand               |                                           |
|                       | Product integration         |                                           |
|                       |                             | stand-alone component                     |
|                       | Language(s)                 |                                           |
|                       | Country(ies)                |                                           |
|                       | Terms & Conditions of use   |                                           |
|                       | Cost                        |                                           |
| Provider Organisation |                             |                                           |
|                       | Provider ID                 |                                           |
|                       | Provider Name               |                                           |
|                       | Provider type               |                                           |
|                       |                             | Privately-owned / for profit organisation |
|                       |                             | Public / state-owned organisation         |
|                       |                             | Not-for-profit organisation               |
|                       | Provider domain of activity |                                           |



























































| Definition                                                                                                                                             |
|--------------------------------------------------------------------------------------------------------------------------------------------------------|
| health technology (device, procedure or system) that could be used to manage adherence to medication                                                   |
| random alphanumeric code given to the product at first entry in the database                                                                           |
| name given by the technology provider to designate the product itself                                                                                  |
| text (max 500 characters including spaces) that provides a short summary of the main functionality and attributes of the technology                    |
| date when the technology first became available                                                                                                        |
| date when the technology had the most recent update                                                                                                    |
| type of support on which (components of) the product (are) is implemented                                                                              |
| product (component) consisting of physical components of electronic systems                                                                            |
| product (component) consisting of programs or other operating information for electronic systems                                                       |
| product (component) consisting of actions to support someone manage adherence to medication                                                            |
| product (component) consisting of physical substances or equipment other than electronic                                                               |
| name used by the technology provider to designate the group to which the product belongs                                                               |
| manner in which the product is intended to be integrated in an adherence support process                                                               |
| product integration in which the technology is intended to function unrelated to other products                                                        |
| product integration in which the technology is intended to link to other products as component of a wider system                                       |
| languages in which the technology is available for use                                                                                                 |
| name of country/countries where technology is in available                                                                                             |
| written rules which two or more parties engage to respect and meet to apply the technology in a setting; may include intellectual property, copyright. |
| amount paid, charged, or engaged to be paid, for purchasing the technology                                                                             |
| organisation that produces and/or makes the product available for users                                                                                |
| random alphanumeric code given at first entry of a product from a provider in the database                                                             |
| name of the provider organisation                                                                                                                      |
| administrative form in which the organisation is registered                                                                                            |
| organisation that operates to generate financial profit                                                                                                |
| organisation that is owned by a government                                                                                                             |
| organisation not intended to make a profit but to provide or support a service that people need                                                        |
| general field in which the organisation is active                                                                                                      |





























































1  
2  
3  
4  
5  
6  
7  
8  
9  
10  
11  
12  
13  
14  
15  
16  
17  
18  
19  
20  
21  
22  
23  
24  
25  
26  
27  
28  
29  
30  
31  
32  
33  
34  
35  
36  
37  
38  
39  
40  
41  
42  
43  
44  
45  
46

**DEVELOPMENT AND JUSTIFICATION**

A repository entry represents any contribution from an author describing a medication adherence technology using the ENABLE template, which they then upload on the platform. Each entry in the ENABLE repository will be stored individually. It will have a unique entry ID, and metadata such as the date of entry, date of most recent modification, and whether the information was verified by another manner (validation process to be developed). It will refer to a unique product, which will be identified with a unique ID, provided by a unique organisation (manufacturer, developer) with its own unique ID. Multiple entries can refer to the same product ID (the reconciliation of entries for the same product will be part of the validation procedures, i.e. by recency or merging of the entries), and an organisation may provide multiple products.

No ontology, taxonomy or classification could be identified in the BioPortal repository or in the literature that provides a formal description of product characteristics used for medication adherence technologies in particular. However, a related ontology was identified that refers to medical technology innovation in healthcare centers. This ontology, developed by members of the Platform for Innovation in Medical and Health Technologies (ITEMAS; a network of healthcare centers aiming to foster innovation in the Spanish healthcare system), includes relevant concepts on the development and adoption of technologies in healthcare and therefore it is an appropriate source of descriptors for the ENABLE repository. The ITEMAS concepts were consulted and concepts referring to products themselves and their providers were selected, since ENABLE aims to describe the technologies and not cover as well the process of developing and integrating them in healthcare systems. This choice of concepts makes the repository interoperable with organisations that would adopt ITEMAS for their activities. Additional constructs were generated after discussion with SC members.

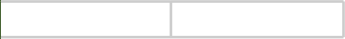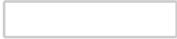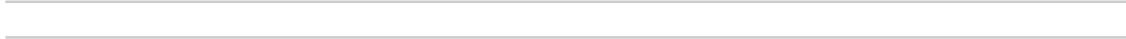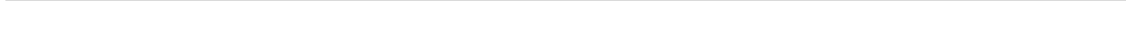

1  
2  
3  
4  
5  
6  
7  
8  
9  
10  
11  
12  
13  
14  
15  
16  
17  
18  
19  
20  
21  
22  
23  
24  
25  
26  
27  
28  
29  
30  
31  
32  
33  
34  
35  
36  
37  
38  
39  
40  
41  
42  
43  
44  
45  
46

---

---

---

---

For peer review only

1  
2  
3  
4  
5  
6  
7  
8  
9  
10  
11  
12  
13  
14  
15  
16  
17  
18  
19  
20  
21  
22  
23  
24  
25  
26  
27  
28  
29  
30  
31  
32  
33  
34  
35  
36  
37  
38  
39  
40  
41  
42  
43  
44  
45  
46

For peer review only

1  
2  
3  
4  
5  
6  
7  
8  
9  
10  
11  
12  
13  
14  
15  
16  
17  
18  
19  
20  
21  
22  
23  
24  
25  
26  
27  
28  
29  
30  
31  
32  
33  
34  
35  
36  
37  
38  
39  
40  
41  
42  
43  
44  
45  
46

For peer review only

1  
2  
3  
4  
5  
6  
7  
8  
9  
10  
11  
12  
13  
14  
15  
16  
17  
18  
19  
20  
21  
22  
23  
24  
25  
26  
27  
28  
29  
30  
31  
32  
33  
34  
35  
36  
37  
38  
39  
40  
41  
42  
43  
44  
45  
46

For peer review only

1  
2  
3  
4  
5  
6  
7  
8  
9  
10  
11  
12  
13  
14  
15  
16  
17  
18  
19  
20  
21  
22  
23  
24  
25  
26  
27  
28  
29  
30  
31  
32  
33  
34  
35  
36  
37  
38  
39  
40  
41  
42  
43  
44  
45  
46

For peer review only

1  
2  
3  
4  
5  
6  
7  
8  
9  
10  
11  
12  
13  
14  
15  
16  
17  
18  
19  
20  
21  
22  
23  
24  
25  
26  
27  
28  
29  
30  
31  
32  
33  
34  
35  
36  
37  
38  
39  
40  
41  
42  
43  
44  
45  
46

For peer review only

1  
2  
3  
4  
5  
6  
7  
8  
9  
10  
11  
12  
13  
14  
15  
16  
17  
18  
19  
20  
21  
22  
23  
24  
25  
26  
27  
28  
29  
30  
31  
32  
33  
34  
35  
36  
37  
38  
39  
40  
41  
42  
43  
44  
45  
46

For peer review only



1  
2  
3  
4  
5  
6  
7  
8  
9  
10  
11  
12  
13  
14  
15  
16  
17  
18  
19  
20  
21  
22  
23  
24  
25  
26  
27  
28  
29  
30  
31  
32  
33  
34  
35  
36  
37  
38  
39  
40  
41  
42  
43  
44  
45  
46

For peer review only

1  
2  
3  
4  
5  
6  
7  
8  
9  
10  
11  
12  
13  
14  
15  
16  
17  
18  
19  
20  
21  
22  
23  
24  
25  
26  
27  
28  
29  
30  
31  
32  
33  
34  
35  
36  
37  
38  
39  
40  
41  
42  
43  
44  
45  
46

For peer review only

1  
2  
3  
4  
5  
6  
7  
8  
9  
10  
11  
12  
13  
14  
15  
16  
17  
18  
19  
20  
21  
22  
23  
24  
25  
26  
27  
28  
29  
30  
31  
32  
33  
34  
35  
36  
37  
38  
39  
40  
41  
42  
43  
44  
45  
46

For peer review only

1  
2  
3  
4  
5  
6  
7  
8  
9  
10  
11  
12  
13  
14  
15  
16  
17  
18  
19  
20  
21  
22  
23  
24  
25  
26  
27  
28  
29  
30  
31  
32  
33  
34  
35  
36  
37  
38  
39  
40  
41  
42  
43  
44  
45  
46

For peer review only

1  
2  
3  
4  
5  
6  
7  
8  
9  
10  
11  
12  
13  
14  
15  
16  
17  
18  
19  
20  
21  
22  
23  
24  
25  
26  
27  
28  
29  
30  
31  
32  
33  
34  
35  
36  
37  
38  
39  
40  
41  
42  
43  
44  
45  
46

For peer review only

1  
2  
3  
4  
5  
6  
7  
8  
9  
10  
11  
12  
13  
14  
15  
16  
17  
18  
19  
20  
21  
22  
23  
24  
25  
26  
27  
28  
29  
30  
31  
32  
33  
34  
35  
36  
37  
38  
39  
40  
41  
42  
43  
44  
45  
46

For peer review only

1  
2  
3  
4  
5  
6  
7  
8  
9  
10  
11  
12  
13  
14  
15  
16  
17  
18  
19  
20  
21  
22  
23  
24  
25  
26  
27  
28  
29  
30  
31  
32  
33  
34  
35  
36  
37  
38  
39  
40  
41  
42  
43  
44  
45  
46

For peer review only

1  
2  
3  
4  
5  
6  
7  
8  
9  
10  
11  
12  
13  
14  
15  
16  
17  
18  
19  
20  
21  
22  
23  
24  
25  
26  
27  
28  
29  
30  
31  
32  
33  
34  
35  
36  
37  
38  
39  
40  
41  
42  
43  
44  
45  
46

For peer review only



1  
2  
3  
4  
5  
6  
7  
8  
9  
10  
11  
12  
13  
14  
15  
16  
17  
18  
19  
20  
21  
22  
23  
24  
25  
26  
27  
28  
29  
30  
31  
32  
33  
34  
35  
36  
37  
38  
39  
40  
41  
42  
43  
44  
45  
46

For peer review only

1  
2  
3  
4  
5  
6  
7  
8  
9  
10  
11  
12  
13  
14  
15  
16  
17  
18  
19  
20  
21  
22  
23  
24  
25  
26  
27  
28  
29  
30  
31  
32  
33  
34  
35  
36  
37  
38  
39  
40  
41  
42  
43  
44  
45  
46

For peer review only

1  
2  
3  
4  
5  
6  
7  
8  
9  
10  
11  
12  
13  
14  
15  
16  
17  
18  
19  
20  
21  
22  
23  
24  
25  
26  
27  
28  
29  
30  
31  
32  
33  
34  
35  
36  
37  
38  
39  
40  
41  
42  
43  
44  
45  
46

For peer review only

1  
2  
3  
4  
5  
6  
7  
8  
9  
10  
11  
12  
13  
14  
15  
16  
17  
18  
19  
20  
21  
22  
23  
24  
25  
26  
27  
28  
29  
30  
31  
32  
33  
34  
35  
36  
37  
38  
39  
40  
41  
42  
43  
44  
45  
46

For peer review only

1  
2  
3  
4  
5  
6  
7  
8  
9  
10  
11  
12  
13  
14  
15  
16  
17  
18  
19  
20  
21  
22  
23  
24  
25  
26  
27  
28  
29  
30  
31  
32  
33  
34  
35  
36  
37  
38  
39  
40  
41  
42  
43  
44  
45  
46

For peer review only

1  
2  
3  
4  
5  
6  
7  
8  
9  
10  
11  
12  
13  
14  
15  
16  
17  
18  
19  
20  
21  
22  
23  
24  
25  
26  
27  
28  
29  
30  
31  
32  
33  
34  
35  
36  
37  
38  
39  
40  
41  
42  
43  
44  
45  
46

For peer review only

1  
2  
3  
4  
5  
6  
7  
8  
9  
10  
11  
12  
13  
14  
15  
16  
17  
18  
19  
20  
21  
22  
23  
24  
25  
26  
27  
28  
29  
30  
31  
32  
33  
34  
35  
36  
37  
38  
39  
40  
41  
42  
43  
44  
45  
46

For peer review only

1  
2  
3  
4  
5  
6  
7  
8  
9  
10  
11  
12  
13  
14  
15  
16  
17  
18  
19  
20  
21  
22  
23  
24  
25  
26  
27  
28  
29  
30  
31  
32  
33  
34  
35  
36  
37  
38  
39  
40  
41  
42  
43  
44  
45  
46

For peer review only



1  
2  
3  
4  
5  
6  
7  
8  
9  
10  
11  
12  
13  
14  
15  
16  
17  
18  
19  
20  
21  
22  
23  
24  
25  
26  
27  
28  
29  
30  
31  
32  
33  
34  
35  
36  
37  
38  
39  
40  
41  
42  
43  
44  
45  
46

For peer review only

1  
2  
3  
4  
5  
6  
7  
8  
9  
10  
11  
12  
13  
14  
15  
16  
17  
18  
19  
20  
21  
22  
23  
24  
25  
26  
27  
28  
29  
30  
31  
32  
33  
34  
35  
36  
37  
38  
39  
40  
41  
42  
43  
44  
45  
46

For peer review only

1  
2  
3  
4  
5  
6  
7  
8  
9  
10  
11  
12  
13  
14  
15  
16  
17  
18  
19  
20  
21  
22  
23  
24  
25  
26  
27  
28  
29  
30  
31  
32  
33  
34  
35  
36  
37  
38  
39  
40  
41  
42  
43  
44  
45  
46

For peer review only

1  
2  
3  
4  
5  
6  
7  
8  
9  
10  
11  
12  
13  
14  
15  
16  
17  
18  
19  
20  
21  
22  
23  
24  
25  
26  
27  
28  
29  
30  
31  
32  
33  
34  
35  
36  
37  
38  
39  
40  
41  
42  
43  
44  
45  
46

For peer review only

|  |  |  |  |  |  |  |  |  |  |  |
|--|--|--|--|--|--|--|--|--|--|--|
|  |  |  |  |  |  |  |  |  |  |  |
|--|--|--|--|--|--|--|--|--|--|--|

1  
2  
3  
4  
5  
6  
7  
8  
9  
10  
11  
12  
13  
14  
15  
16  
17  
18  
19  
20  
21  
22  
23  
24  
25  
26  
27  
28  
29  
30  
31  
32  
33  
34  
35  
36  
37  
38  
39  
40  
41  
42  
43  
44  
45  
46

For peer review only

1  
2  
3  
4  
5  
6  
7  
8  
9  
10  
11  
12  
13  
14  
15  
16  
17  
18  
19  
20  
21  
22  
23  
24  
25  
26  
27  
28  
29  
30  
31  
32  
33  
34  
35  
36  
37  
38  
39  
40  
41  
42  
43  
44  
45  
46

For peer review only

1  
2  
3  
4  
5  
6  
7  
8  
9  
10  
11  
12  
13  
14  
15  
16  
17  
18  
19  
20  
21  
22  
23  
24  
25  
26  
27  
28  
29  
30  
31  
32  
33  
34  
35  
36  
37  
38  
39  
40  
41  
42  
43  
44  
45  
46

For peer review only

1  
2  
3  
4  
5  
6  
7  
8  
9  
10  
11  
12  
13  
14  
15  
16  
17  
18  
19  
20  
21  
22  
23  
24  
25  
26  
27  
28  
29  
30  
31  
32  
33  
34  
35  
36  
37  
38  
39  
40  
41  
42  
43  
44  
45  
46

For peer review only



1  
2  
3  
4  
5  
6  
7  
8  
9  
10  
11  
12  
13  
14  
15  
16  
17  
18  
19  
20  
21  
22  
23  
24  
25  
26  
27  
28  
29  
30  
31  
32  
33  
34  
35  
36  
37  
38  
39  
40  
41  
42  
43  
44  
45  
46

For peer review only

1  
2  
3  
4  
5  
6  
7  
8  
9  
10  
11  
12  
13  
14  
15  
16  
17  
18  
19  
20  
21  
22  
23  
24  
25  
26  
27  
28  
29  
30  
31  
32  
33  
34  
35  
36  
37  
38  
39  
40  
41  
42  
43  
44  
45  
46

For peer review only

1  
2  
3  
4  
5  
6  
7  
8  
9  
10  
11  
12  
13  
14  
15  
16  
17  
18  
19  
20  
21  
22  
23  
24  
25  
26  
27  
28  
29  
30  
31  
32  
33  
34  
35  
36  
37  
38  
39  
40  
41  
42  
43  
44  
45  
46

For peer review only

1  
2  
3  
4  
5  
6  
7  
8  
9  
10  
11  
12  
13  
14  
15  
16  
17  
18  
19  
20  
21  
22  
23  
24  
25  
26  
27  
28  
29  
30  
31  
32  
33  
34  
35  
36  
37  
38  
39  
40  
41  
42  
43  
44  
45  
46

For peer review only

1  
2  
3  
4  
5  
6  
7  
8  
9  
10  
11  
12  
13  
14  
15  
16  
17  
18  
19  
20  
21  
22  
23  
24  
25  
26  
27  
28  
29  
30  
31  
32  
33  
34  
35  
36  
37  
38  
39  
40  
41  
42  
43  
44  
45  
46

For peer review only

1  
2  
3  
4  
5  
6  
7  
8  
9  
10  
11  
12  
13  
14  
15  
16  
17  
18  
19  
20  
21  
22  
23  
24  
25  
26  
27  
28  
29  
30  
31  
32  
33  
34  
35  
36  
37  
38  
39  
40  
41  
42  
43  
44  
45  
46

For peer review only

1  
2  
3  
4  
5  
6  
7  
8  
9  
10  
11  
12  
13  
14  
15  
16  
17  
18  
19  
20  
21  
22  
23  
24  
25  
26  
27  
28  
29  
30  
31  
32  
33  
34  
35  
36  
37  
38  
39  
40  
41  
42  
43  
44  
45  
46

For peer review only

1  
2  
3  
4  
5  
6  
7  
8  
9  
10  
11  
12  
13  
14  
15  
16  
17  
18  
19  
20  
21  
22  
23  
24  
25  
26  
27  
28  
29  
30  
31  
32  
33  
34  
35  
36  
37  
38  
39  
40  
41  
42  
43  
44  
45  
46

For peer review only



1  
2  
3  
4  
5  
6  
7  
8  
9  
10  
11  
12  
13  
14  
15  
16  
17  
18  
19  
20  
21  
22  
23  
24  
25  
26  
27  
28  
29  
30  
31  
32  
33  
34  
35  
36  
37  
38  
39  
40  
41  
42  
43  
44  
45  
46

For peer review only

1  
2  
3  
4  
5  
6  
7  
8  
9  
10  
11  
12  
13  
14  
15  
16  
17  
18  
19  
20  
21  
22  
23  
24  
25  
26  
27  
28  
29  
30  
31  
32  
33  
34  
35  
36  
37  
38  
39  
40  
41  
42  
43  
44  
45  
46

For peer review only

1  
2  
3  
4  
5  
6  
7  
8  
9  
10  
11  
12  
13  
14  
15  
16  
17  
18  
19  
20  
21  
22  
23  
24  
25  
26  
27  
28  
29  
30  
31  
32  
33  
34  
35  
36  
37  
38  
39  
40  
41  
42  
43  
44  
45  
46

For peer review only

1  
2  
3  
4  
5  
6  
7  
8  
9  
10  
11  
12  
13  
14  
15  
16  
17  
18  
19  
20  
21  
22  
23  
24  
25  
26  
27  
28  
29  
30  
31  
32  
33  
34  
35  
36  
37  
38  
39  
40  
41  
42  
43  
44  
45  
46

For peer review only

1  
2  
3  
4  
5  
6  
7  
8  
9  
10  
11  
12  
13  
14  
15  
16  
17  
18  
19  
20  
21  
22  
23  
24  
25  
26  
27  
28  
29  
30  
31  
32  
33  
34  
35  
36  
37  
38  
39  
40  
41  
42  
43  
44  
45  
46

For peer review only

1  
2  
3  
4  
5  
6  
7  
8  
9  
10  
11  
12  
13  
14  
15  
16  
17  
18  
19  
20  
21  
22  
23  
24  
25  
26  
27  
28  
29  
30  
31  
32  
33  
34  
35  
36  
37  
38  
39  
40  
41  
42  
43  
44  
45  
46

For peer review only

1  
2  
3  
4  
5  
6  
7  
8  
9  
10  
11  
12  
13  
14  
15  
16  
17  
18  
19  
20  
21  
22  
23  
24  
25  
26  
27  
28  
29  
30  
31  
32  
33  
34  
35  
36  
37  
38  
39  
40  
41  
42  
43  
44  
45  
46

For peer review only

1  
2  
3  
4  
5  
6  
7  
8  
9  
10  
11  
12  
13  
14  
15  
16  
17  
18  
19  
20  
21  
22  
23  
24  
25  
26  
27  
28  
29  
30  
31  
32  
33  
34  
35  
36  
37  
38  
39  
40  
41  
42  
43  
44  
45  
46

For peer review only



1  
2  
3  
4  
5  
6  
7  
8  
9  
10  
11  
12  
13  
14  
15  
16  
17  
18  
19  
20  
21  
22  
23  
24  
25  
26  
27  
28  
29  
30  
31  
32  
33  
34  
35  
36  
37  
38  
39  
40  
41  
42  
43  
44  
45  
46

For peer review only

1  
2  
3  
4  
5  
6  
7  
8  
9  
10  
11  
12  
13  
14  
15  
16  
17  
18  
19  
20  
21  
22  
23  
24  
25  
26  
27  
28  
29  
30  
31  
32  
33  
34  
35  
36  
37  
38  
39  
40  
41  
42  
43  
44  
45  
46

For peer review only

1  
2  
3  
4  
5  
6  
7  
8  
9  
10  
11  
12  
13  
14  
15  
16  
17  
18  
19  
20  
21  
22  
23  
24  
25  
26  
27  
28  
29  
30  
31  
32  
33  
34  
35  
36  
37  
38  
39  
40  
41  
42  
43  
44  
45  
46

For peer review only

1  
2  
3  
4  
5  
6  
7  
8  
9  
10  
11  
12  
13  
14  
15  
16  
17  
18  
19  
20  
21  
22  
23  
24  
25  
26  
27  
28  
29  
30  
31  
32  
33  
34  
35  
36  
37  
38  
39  
40  
41  
42  
43  
44  
45  
46

For peer review only

1  
2  
3  
4  
5  
6  
7  
8  
9  
10  
11  
12  
13  
14  
15  
16  
17  
18  
19  
20  
21  
22  
23  
24  
25  
26  
27  
28  
29  
30  
31  
32  
33  
34  
35  
36  
37  
38  
39  
40  
41  
42  
43  
44  
45  
46

For peer review only

1  
2  
3  
4  
5  
6  
7  
8  
9  
10  
11  
12  
13  
14  
15  
16  
17  
18  
19  
20  
21  
22  
23  
24  
25  
26  
27  
28  
29  
30  
31  
32  
33  
34  
35  
36  
37  
38  
39  
40  
41  
42  
43  
44  
45  
46

For peer review only

1  
2  
3  
4  
5  
6  
7  
8  
9  
10  
11  
12  
13  
14  
15  
16  
17  
18  
19  
20  
21  
22  
23  
24  
25  
26  
27  
28  
29  
30  
31  
32  
33  
34  
35  
36  
37  
38  
39  
40  
41  
42  
43  
44  
45  
46

For peer review only

|  |  |  |  |  |  |
|--|--|--|--|--|--|
|  |  |  |  |  |  |
|--|--|--|--|--|--|

1  
2  
3  
4  
5  
6  
7  
8  
9  
10  
11  
12  
13  
14  
15  
16  
17  
18  
19  
20  
21  
22  
23  
24  
25  
26  
27  
28  
29  
30  
31  
32  
33  
34  
35  
36  
37  
38  
39  
40  
41  
42  
43  
44  
45  
46

| upper level                   | Sub-level 1                          | Sub-level 2       | Sub-level 3                                         |                             |  |
|-------------------------------|--------------------------------------|-------------------|-----------------------------------------------------|-----------------------------|--|
| adherence self-management use | Person in the healthcare environment | Patient           |                                                     |                             |  |
|                               |                                      | Caregiver         |                                                     |                             |  |
|                               | Patient age group                    | Adult             |                                                     | Older adult                 |  |
|                               |                                      | Adolescent        |                                                     |                             |  |
|                               |                                      | Child             |                                                     |                             |  |
|                               |                                      | Infant            |                                                     |                             |  |
|                               | Patient functional status            | Mental functions  |                                                     | Memory functions            |  |
|                               |                                      |                   |                                                     | Perceptual functions        |  |
|                               |                                      | Sensory functions |                                                     | Seeing functions            |  |
|                               |                                      |                   |                                                     | Hearing functions           |  |
|                               |                                      | Patient literacy  | Neuromusculoskeletal and movement-related functions |                             |  |
|                               |                                      |                   |                                                     | Patient health literacy     |  |
|                               |                                      |                   |                                                     | Patient medication literacy |  |
| adherence support service use | Patient polypharmacy                 |                   |                                                     |                             |  |
|                               | Patient multimorbidity               |                   |                                                     |                             |  |



1  
2  
3  
4  
5  
6  
7  
8  
9  
10  
11  
12  
13  
14  
15  
16  
17  
18  
19  
20  
21  
22  
23  
24  
25  
26  
27  
28  
29  
30  
31  
32  
33  
34  
35  
36  
37  
38  
39  
40  
41  
42  
43  
44  
45  
46

Professional health and social  
care providers  
Health (system) manager

For peer review only

**Definition**

Scenario in which the technology is used for adherence self-management activities

Person who interacts with the technology within the process of self-management

Person who uses the technology for self-management of their own adherence

Person who uses the technology to assist the patient in their self-management of adherence

Age group of the person for which the medical technology is appropriate for use

Person aged over 18 years

Adult aged over 66 years

Person aged between 12 and 18 years

Person aged between 1 and 12 years

Person aged less than 1 year

The level of functioning of the person for which the technology is appropriate

Patient status regarding functions of the brain involved in adherence self-management

Functions regarding registering, storing, retrieving information for adherence self-management and/or using technology for this purpose

Functions regarding recognizing and interpreting sensory stimuli necessary for adherence self-management and/or using technology for this purpose

Functions regarding recognizing and interpreting visual stimuli (light, form, shape, size, color)

Functions regarding recognizing and interpreting auditive stimuli (presence, location, pitch, loudness and quality of sounds)

Functions regarding movement and mobility (of joints, bones, reflexes and muscles)

The patient's ability to read and write needed to manage adherence

The patient's capacity to obtain, process and understand basic health information and services needed to self-manage adherence

The patient's ability to understand and act on medication-related information

The use of multiple drugs (5+) administered to the same patient

complex interactions of several (2+) co-existing diseases occurring in the same patient

Scenario in which the technology is used for activities supporting taking medication in an health/social care provision setting

1  
2  
3  
4  
5  
6  
7  
8  
9  
10  
11  
12  
13  
14  
15  
16  
17  
18  
19  
20  
21  
22  
23  
24  
25  
26  
27  
28  
29  
30  
31  
32  
33  
34  
35  
36  
37  
38  
39  
40  
41  
42  
43  
44  
45  
46

Members of the health and social care workforce who deliver adherence support services

Persons involved in the administration and oversight of public health systems delivering adherence support services

For peer review only

### DEVELOPMENT AND JUSTIFICATION

Among the various use scenarios for medication adherence management, we can distinguish two general categories in what concerns the potential types of users and their characteristics that might influence the choice of technology: self-management use, and adherence support use. In the first scenario, it is either the patient or the caregiver who might be interested in searching the repository for technologies the patient can use themselves, or the couple patient-caregiver can use in the shared management of medication intake, for example at home. In the second scenario, a healthcare (or social care) provider may be interested in technologies they can use themselves to facilitate adherence support. A technology can apply to both use scenarios, for example when a monitoring technology is used by both patients/caregivers and the professionals who accompany them in their treatment and information can be transmitted from one to another (each having their own interface). Thus, the set of descriptors regarding target users operates this basic distinction.

The use of medication adherence technologies may be influenced by several characteristics of the patients, such as their age group, functional status regarding mental functions (e.g. memory and perception), sensory functions (e.g. vision and hearing), and movement-related functions, as well as characteristics of their health condition or treatment (e.g. multimorbidity and polypharmacy). Literacy and health literacy (and specifically medication literacy) are also central to the appropriateness and effectiveness of self-management support. Thus, descriptors related to these characteristics were identified in available ontologies (e.g. SNOMED-CT, WHO International Classification of Function) and included in the list of descriptors.

According to the WHO client classification (regarding Digital Health Interventions; DHI), there are two categories of potential clients of digital health technologies in addition to patients and caregivers: healthcare providers and health system managers. These were included as sub-categories of the adherence support use scenario, since both types of professionals (including here social care organisations and providers) can initiate a search for technologies to integrate in their practice. No characteristics of these types of users/clients were considered relevant for the choice of the tool in this initial version of the list. The provider of an adherence support intervention and the setting in which this can be performed are the focus of separate descriptor sets, since they can be different from the user who initiates the search (who can perform this for an entire team, including the patient and their caregiver).

| Upper level                    | Definition                                                                                                                                                                                                 |
|--------------------------------|------------------------------------------------------------------------------------------------------------------------------------------------------------------------------------------------------------|
| Blood                          | Health condition category that refers to haematological diseases, anaemia, clotting (including thromboses and venous embolisms)                                                                            |
| Cancer and neoplasms           | Health condition category that refers to all types of neoplasms, including benign, potentially malignant, or malignant (cancer) cancer growths (including leukaemia and mesothelioma).                     |
| Cardiovascular                 | Health condition category that refers to coronary heart disease, diseases of the vasculature and circulation including the lymphatic system                                                                |
| Congenital disorder            | Health condition category that refers to physical abnormalities and syndromes that are not associated with a single type of disease or condition, including Down's syndrome and cystic fibrosis            |
| Ear                            | Health condition category that refers to diseases of the ear, such as deafness                                                                                                                             |
| Eye                            | Health condition category that refers to diseases of the eye                                                                                                                                               |
| Infection                      | Health condition category that refers to diseases caused by pathogens, acquired immune deficiency syndrome, sexually transmitted infections                                                                |
| Inflammatory and immune system | Health condition category that refers to rheumatoid arthritis, connective tissue diseases, autoimmune diseases, allergies. (includes transplants)                                                          |
| Injuries and accidents         | Fractures, poisoning and burns.                                                                                                                                                                            |
| Mental health                  | Health condition category that refers to depression, schizophrenia, psychosis and personality disorders, addiction, suicide, anxiety, eating disorders, learning disabilities, autistic spectrum disorders |
| Metabolic and endocrine        | Health condition category that refers to metabolic disorders (including diabetes, and diseases of the pineal, thyroid, parathyroid, pituitary and adrenal glands).                                         |
| Musculoskeletal                | Health condition category that refers to osteoporosis, osteoarthritis, muscular and skeletal disorders                                                                                                     |

|    |                                    |                                                                              |
|----|------------------------------------|------------------------------------------------------------------------------|
| 1  |                                    |                                                                              |
| 2  | Neurological                       | Health condition category that refers to dementias, transmissible            |
| 3  |                                    | spongiform encephalopathies, Parkinson's disease, neurodegenerative          |
| 4  |                                    | diseases, Alzheimer's disease, epilepsy, multiple sclerosis                  |
| 5  |                                    |                                                                              |
| 6  | Oral and gastrointestinal          | Health condition category that refers to inflammatory bowel disease,         |
| 7  |                                    | Crohn's disease, diseases of the mouth, teeth, oesophagus, digestive         |
| 8  |                                    | system including liver and colon                                             |
| 9  | Renal and urogenital               | Health condition category that refers to kidney disease, pelvic              |
| 10 |                                    | inflammatory disease, renal and genital disorders                            |
| 11 | Reproductive health and childbirth | Health condition category that refers to fertility, contraception, abortion, |
| 12 |                                    | in vitro fertilisation, pregnancy, mammary gland development,                |
| 13 |                                    | menstruation and menopause, breast feeding, antenatal care, childbirth       |
| 14 |                                    | and complications of newborns                                                |
| 15 |                                    |                                                                              |
| 16 | Respiratory                        | Health condition category that refers to asthma, chronic obstructive         |
| 17 |                                    | pulmonary disease, and other respiratory diseases                            |
| 18 | Skin                               | Health condition category that refers to dermatological conditions           |
| 19 | Stroke                             | Health condition category that refers to ischaemic stroke (caused by         |
| 20 |                                    | blood clots) and haemorrhagic stroke (caused by cerebral/intercranial        |
| 21 |                                    | haemorrhage).                                                                |
| 22 |                                    |                                                                              |
| 23 | Generic health relevance           | Health condition category that refers to technologies applicable to all      |
| 24 |                                    | diseases and conditions                                                      |
| 25 |                                    |                                                                              |
| 26 |                                    |                                                                              |
| 27 |                                    |                                                                              |
| 28 |                                    |                                                                              |
| 29 |                                    |                                                                              |
| 30 |                                    |                                                                              |
| 31 |                                    |                                                                              |
| 32 |                                    |                                                                              |
| 33 |                                    |                                                                              |
| 34 |                                    |                                                                              |
| 35 |                                    |                                                                              |
| 36 |                                    |                                                                              |
| 37 |                                    |                                                                              |
| 38 |                                    |                                                                              |
| 39 |                                    |                                                                              |
| 40 |                                    |                                                                              |
| 41 |                                    |                                                                              |
| 42 |                                    |                                                                              |
| 43 |                                    |                                                                              |
| 44 |                                    |                                                                              |
| 45 |                                    |                                                                              |
| 46 |                                    |                                                                              |

**DEVELOPMENT AND JUSTIFICATION**

Depending on the health conditions for which medication is prescribed, adherence behaviours may be influenced by different factors and therefore require condition-specific interventions. Adherence technologies are therefore usually developed and validated to be used in one or several clinical domains and potential users may search for technologies applicable to the health condition(s) they aim to manage.

The International Classification of Disease (ICD-11) is a global standard for diagnostic purposes, and groups diseases in over 17000 categories ([icd.who.int](http://icd.who.int)). In ICD-11, 21 groups of codes (chapters) are proposed to describe health conditions, among other groups of codes for related diagnostic purposes. While ICD-11 is an elaborate classification used for clinical documentation and monitoring globally, a simpler classification has been developed by the UK Clinical Research Collaboration for research purposes: the Health Research Classification System (HRCS) (<https://hrcsonline.net/health-categories>). The HRCS is inspired by ICD and includes 21 separate disease categories, 19 of which are disease specific whereas the other 2 have a broader focus (e.g. general health and epidemiology, conditions of unknown aetiology). Of the 20 HRCS categories, 18 correspond broadly to ICD-11 chapters (merging 3 chapters into one category for reproductive health and childbirth, and omitting sleep-wake disorders), while the 19th refers to stroke as a distinct group of conditions. For the purpose of the present repository, we have therefore selected HRCS as 1) it is likely that research on adherence technologies will increasingly use these codes to record the type of health conditions studies are performed on and thus would map easier on these categories, and 2) the labels and descriptions used are relatively less technical and therefore easier to understand by stakeholders with diverse backgrounds. We considered that the last category ('Disputed aetiology and other') is less relevant for medication adherence and thus we excluded it from our descriptors list. The HRCS classification system, based on the ICD classification, would allow repository users to quickly and efficiently identify the type of health condition of their interest.

| Upper level                     | Sub-level 1             | Definition                                                                                                                                                           |
|---------------------------------|-------------------------|----------------------------------------------------------------------------------------------------------------------------------------------------------------------|
| type of intention               | preventive              | The purpose for which the medication is prescribed.                                                                                                                  |
|                                 |                         | Medication are prescribed as prevention/prophylaxis against the occurrence of diseases or disease-related adverse events (e.g. exacerbations, organ rejections etc.) |
| duration of treatment           | therapeutic             | Medication is prescribed as treatment of a disease and its associated symptoms.                                                                                      |
|                                 | short-term              | The duration of treatment presents the intended interval of treatment and relates to the clinical course and disease conditions.                                     |
| route of administration         | long-term               | treatment is prescribed over a limited time-period, mostly to treat an acute disease of sudden-onset and predictable end.                                            |
|                                 | injections/subcutaneous | treatment is prescribed as a prolonged and persistently indicated therapy as it is the case in chronic, latent-progressive disease conditions.                       |
| number of monitored medications | oral                    | path by which medication is brought into contact with the body to unfold pharmacological effects.                                                                    |
|                                 | inhaled                 | Medications are administered as oral forms (tablets etc.) for drug reception via the mouth or gastro-intestinal tract.                                               |
| single medication               | injections/subcutaneous | Medications are administered as inhalation of aerosols, powders or gas via the respiratory tract.                                                                    |
|                                 | infusion/parenteral     | Medications are administered as injection in subcutaneous layer for a relative slow drug release.                                                                    |
| multiple medication             | patches                 | Medications are administered as parenteral infusion for direct intra-venous application.                                                                             |
|                                 | topical                 | Medications are administered as a dermal layer (e.g. patch) to achieve systemic drug-concentration and -efficacy.                                                    |
|                                 |                         | Medications are administered as topical forms for local effects on dermal or mucous surfaces/layers.                                                                 |
|                                 |                         | how many distinct medications are monitored by the technology, if applicable                                                                                         |
|                                 | single medication       | Only treatment of a single medication is monitored.                                                                                                                  |
|                                 | multiple medication     | A combination therapy of two or more medications is monitored.                                                                                                       |



1  
2  
3  
4  
5  
6  
7  
8  
9  
10  
11  
12  
13  
14  
15  
16  
17  
18  
19  
20  
21  
22  
23  
24  
25  
26  
27  
28  
29  
30  
31  
32  
33  
34  
35  
36  
37  
38  
39  
40  
41  
42  
43  
44  
45  
46

|                             |                                             |                                                                                                                                                    |
|-----------------------------|---------------------------------------------|----------------------------------------------------------------------------------------------------------------------------------------------------|
| prescribed dosing frequency |                                             | dose-taking patterns recommended for medicines administration, in which doses should be taken at defined time intervals over a defined time period |
|                             | once-daily dosing                           | Only one dose is prescribed at a certain time during the day.                                                                                      |
|                             | multiple daily dosing at fixed intervals    | Multiple doses are prescribed in a certain interval during the day.                                                                                |
|                             | once per week dosing                        | Only one dose is prescribed at a certain day during the week.                                                                                      |
|                             | multiple dosing per week in fixed intervals | Multiple doses are prescribed in a certain interval during the week.                                                                               |
|                             | dose adjustment recommendations             | The frequency or amount of a certain dose is adjusted to the newly prescribed treatment regimen.                                                   |
|                             |                                             |                                                                                                                                                    |
|                             |                                             |                                                                                                                                                    |
|                             |                                             |                                                                                                                                                    |
|                             |                                             |                                                                                                                                                    |
|                             |                                             |                                                                                                                                                    |
|                             |                                             |                                                                                                                                                    |
|                             |                                             |                                                                                                                                                    |
|                             |                                             |                                                                                                                                                    |
|                             |                                             |                                                                                                                                                    |
|                             |                                             |                                                                                                                                                    |
|                             |                                             |                                                                                                                                                    |
|                             |                                             |                                                                                                                                                    |
|                             |                                             |                                                                                                                                                    |
|                             |                                             |                                                                                                                                                    |
|                             |                                             |                                                                                                                                                    |
|                             |                                             |                                                                                                                                                    |
|                             |                                             |                                                                                                                                                    |
|                             |                                             |                                                                                                                                                    |
|                             |                                             |                                                                                                                                                    |
|                             |                                             |                                                                                                                                                    |
|                             |                                             |                                                                                                                                                    |
|                             |                                             |                                                                                                                                                    |
|                             |                                             |                                                                                                                                                    |







|    |  |
|----|--|
| 1  |  |
| 2  |  |
| 3  |  |
| 4  |  |
| 5  |  |
| 6  |  |
| 7  |  |
| 8  |  |
| 9  |  |
| 10 |  |
| 11 |  |
| 12 |  |
| 13 |  |
| 14 |  |
| 15 |  |
| 16 |  |
| 17 |  |
| 18 |  |
| 19 |  |
| 20 |  |
| 21 |  |
| 22 |  |
| 23 |  |
| 24 |  |
| 25 |  |
| 26 |  |
| 27 |  |
| 28 |  |
| 29 |  |
| 30 |  |
| 31 |  |
| 32 |  |
| 33 |  |
| 34 |  |
| 35 |  |
| 36 |  |
| 37 |  |
| 38 |  |
| 39 |  |
| 40 |  |
| 41 |  |
| 42 |  |
| 43 |  |
| 44 |  |
| 45 |  |
| 46 |  |

For peer review only













|    |  |
|----|--|
| 1  |  |
| 2  |  |
| 3  |  |
| 4  |  |
| 5  |  |
| 6  |  |
| 7  |  |
| 8  |  |
| 9  |  |
| 10 |  |
| 11 |  |
| 12 |  |
| 13 |  |
| 14 |  |
| 15 |  |
| 16 |  |
| 17 |  |
| 18 |  |
| 19 |  |
| 20 |  |
| 21 |  |
| 22 |  |
| 23 |  |
| 24 |  |
| 25 |  |
| 26 |  |
| 27 |  |
| 28 |  |
| 29 |  |
| 30 |  |
| 31 |  |
| 32 |  |
| 33 |  |
| 34 |  |
| 35 |  |
| 36 |  |
| 37 |  |
| 38 |  |
| 39 |  |
| 40 |  |
| 41 |  |
| 42 |  |
| 43 |  |
| 44 |  |
| 45 |  |
| 46 |  |

For peer review only



|    |  |
|----|--|
| 1  |  |
| 2  |  |
| 3  |  |
| 4  |  |
| 5  |  |
| 6  |  |
| 7  |  |
| 8  |  |
| 9  |  |
| 10 |  |
| 11 |  |
| 12 |  |
| 13 |  |
| 14 |  |
| 15 |  |
| 16 |  |
| 17 |  |
| 18 |  |
| 19 |  |
| 20 |  |
| 21 |  |
| 22 |  |
| 23 |  |
| 24 |  |
| 25 |  |
| 26 |  |
| 27 |  |
| 28 |  |
| 29 |  |
| 30 |  |
| 31 |  |
| 32 |  |
| 33 |  |
| 34 |  |
| 35 |  |
| 36 |  |
| 37 |  |
| 38 |  |
| 39 |  |
| 40 |  |
| 41 |  |
| 42 |  |
| 43 |  |
| 44 |  |
| 45 |  |
| 46 |  |

For peer review only



|    |  |
|----|--|
| 1  |  |
| 2  |  |
| 3  |  |
| 4  |  |
| 5  |  |
| 6  |  |
| 7  |  |
| 8  |  |
| 9  |  |
| 10 |  |
| 11 |  |
| 12 |  |
| 13 |  |
| 14 |  |
| 15 |  |
| 16 |  |
| 17 |  |
| 18 |  |
| 19 |  |
| 20 |  |
| 21 |  |
| 22 |  |
| 23 |  |
| 24 |  |
| 25 |  |
| 26 |  |
| 27 |  |
| 28 |  |
| 29 |  |
| 30 |  |
| 31 |  |
| 32 |  |
| 33 |  |
| 34 |  |
| 35 |  |
| 36 |  |
| 37 |  |
| 38 |  |
| 39 |  |
| 40 |  |
| 41 |  |
| 42 |  |
| 43 |  |
| 44 |  |
| 45 |  |
| 46 |  |

For peer review only













|    |  |
|----|--|
| 1  |  |
| 2  |  |
| 3  |  |
| 4  |  |
| 5  |  |
| 6  |  |
| 7  |  |
| 8  |  |
| 9  |  |
| 10 |  |
| 11 |  |
| 12 |  |
| 13 |  |
| 14 |  |
| 15 |  |
| 16 |  |
| 17 |  |
| 18 |  |
| 19 |  |
| 20 |  |
| 21 |  |
| 22 |  |
| 23 |  |
| 24 |  |
| 25 |  |
| 26 |  |
| 27 |  |
| 28 |  |
| 29 |  |
| 30 |  |
| 31 |  |
| 32 |  |
| 33 |  |
| 34 |  |
| 35 |  |
| 36 |  |
| 37 |  |
| 38 |  |
| 39 |  |
| 40 |  |
| 41 |  |
| 42 |  |
| 43 |  |
| 44 |  |
| 45 |  |
| 46 |  |

For peer review only



|    |  |
|----|--|
| 1  |  |
| 2  |  |
| 3  |  |
| 4  |  |
| 5  |  |
| 6  |  |
| 7  |  |
| 8  |  |
| 9  |  |
| 10 |  |
| 11 |  |
| 12 |  |
| 13 |  |
| 14 |  |
| 15 |  |
| 16 |  |
| 17 |  |
| 18 |  |
| 19 |  |
| 20 |  |
| 21 |  |
| 22 |  |
| 23 |  |
| 24 |  |
| 25 |  |
| 26 |  |
| 27 |  |
| 28 |  |
| 29 |  |
| 30 |  |
| 31 |  |
| 32 |  |
| 33 |  |
| 34 |  |
| 35 |  |
| 36 |  |
| 37 |  |
| 38 |  |
| 39 |  |
| 40 |  |
| 41 |  |
| 42 |  |
| 43 |  |
| 44 |  |
| 45 |  |
| 46 |  |

For peer review only













### DEVELOPMENT AND JUSTIFICATION

Factors related to the medication regimen are among the 5 main groups of determinants influencing medication adherence (WHO, 2003). The medication regimen for which adherence is to be managed can take different schematic forms and be of varying complexity, which may influence the complexity and extent of medication adherence. Medication adherence technologies may be developed for medications with different attributes, therefore ENABLE repository users should be able to indicate what type of medication regimen they are aiming to manage and how a technology fits these specific attributes.

We distinguished five descriptors relevant for medication adherence that refer to properties of medication regimens. The type of intention refers to the purpose of treatment as prevention or therapy, while the duration of treatment is related to the clinical course (e.g., acute/sudden-onset or chronic /latent-progressive course). Both depend on disease conditions and determine the purpose and duration of adherence management. The route of administration, the number of medications and the prescribed dosing frequency are the main components of the variability and complexity of prescribed regimens. Thus, descriptors related to these medication regimen attributes were identified in available ontologies (e.g., NCIT, MeSH and SNOMED-CT) and included in the list of descriptors.

It is important to note that we have selected, from among a broader range of routes of administration and types of dosing frequency, the ones we considered relevant for adherence to medication; for example, we have excluded 'as needed' dosing as it cannot be subject to a comparison between actual and prescribed dosing histories (the definition of adherence), and routes of administration likely to require a healthcare professional and thus be less influenced by adherence as a patient behavior.

| Upper Level                         | Sub-Level 1                   | Definition                                                                                                                                                                                                                        |
|-------------------------------------|-------------------------------|-----------------------------------------------------------------------------------------------------------------------------------------------------------------------------------------------------------------------------------|
| D2.4.1 Medication adherence phase   |                               | Time interval between the prescription start and end dates that is behaviorally distinct (i.e. linked with specific determinants)                                                                                                 |
|                                     | Initiation                    | Phase of adherence that covers the start of a prescribed treatment, i.e. the period from when the prescription is issued to the first dose taken (i.e. the initiation event)                                                      |
|                                     | Implementation                | Phase of adherence from the initiation until the last dose taken during which one can estimate the extent to which the patient's dose taking and timing are linked to the prescribed dosing                                       |
|                                     | Discontinuation (Persistence) | Phase of adherence that refers to the end of treatment execution and covers the period until last dose is taken, e.g. end of therapy or termination by patient. Persistence is the period between initiation and discontinuation. |
| D2.4.2 Type of adherence management |                               | The goal of adherence management that the technology is designed to address.                                                                                                                                                      |
|                                     | Monitoring/Measurement        | Type of adherence management that refers to estimating (repeatedly) medication adherence behaviours, determinants, and/or outcomes                                                                                                |
|                                     | Support/Intervention          | Type of adherence management that refers to generating change in medication adherence determinants and thus behaviours and outcomes.                                                                                              |
|                                     |                               |                                                                                                                                                                                                                                   |
|                                     |                               |                                                                                                                                                                                                                                   |
|                                     |                               |                                                                                                                                                                                                                                   |
|                                     |                               |                                                                                                                                                                                                                                   |
|                                     |                               |                                                                                                                                                                                                                                   |
|                                     |                               |                                                                                                                                                                                                                                   |
|                                     |                               |                                                                                                                                                                                                                                   |
|                                     |                               |                                                                                                                                                                                                                                   |
|                                     |                               |                                                                                                                                                                                                                                   |
|                                     |                               |                                                                                                                                                                                                                                   |
|                                     |                               |                                                                                                                                                                                                                                   |
|                                     |                               |                                                                                                                                                                                                                                   |
|                                     |                               |                                                                                                                                                                                                                                   |
|                                     |                               |                                                                                                                                                                                                                                   |
|                                     |                               |                                                                                                                                                                                                                                   |

1  
2  
3  
4  
5  
6  
7  
8  
9  
10  
11  
12  
13  
14  
15  
16  
17  
18  
19  
20  
21  
22  
23  
24  
25  
26  
27  
28  
29  
30  
31  
32  
33  
34  
35  
36  
37  
38  
39  
40  
41  
42  
43  
44  
45  
46































































1  
2  
3  
4  
5  
6  
7  
8  
9  
10  
11  
12  
13  
14  
15  
16  
17  
18  
19  
20  
21  
22  
23  
24  
25  
26  
27  
28  
29  
30  
31  
32  
33  
34  
35  
36  
37  
38  
39  
40  
41  
42  
43  
44  
45  
46

|  |  |
|--|--|
|  |  |
|  |  |
|  |  |
|  |  |
|  |  |
|  |  |
|  |  |

For peer review only

### DEVELOPMENT AND JUSTIFICATION

Technologies described in the ENABLE repository will be used either for self-management use by patients themselves or for supporting this process by health and social care providers within healthcare institutions or systems. The general term that describes both these use scenarios, according to the ABC taxonomy (Vrijens 2012), is “management of adherence”, i.e., “the process of monitoring and supporting patients' adherence to medications by health care systems, providers, patients, and or their social networks”. Thus, in this definition, a distinction is made between ‘monitoring’ (or measuring, which can target the behaviors themselves, their determinants, and/or their relevant outcomes), and ‘supporting’ adherence (or intervening to achieve best use of appropriately prescribed medicines by patients). As technologies may focus on one or both these goals, we have given the possibility for users to search for each goal/type of management (for example in situations when they would like to combine technologies into a broader adherence management solution). As both metrics and intervention may require different approaches depending on what phase of adherence is of concern, we have also given the possibility for users (and technologies) to specify which adherence phase they target, i.e.:

- 1) initiation, which “occurs when the patient takes the first dose of a prescribed medication”
- 2) implementation, which “is the extent to which a patient's actual dosing corresponds to the prescribed dosing regimen, from initiation until the last dose”

| Upper Level        | Sub-Level 1                  | Sub-level 2              | Sub-level 3   | Definition                                                                                                                                                                      |
|--------------------|------------------------------|--------------------------|---------------|---------------------------------------------------------------------------------------------------------------------------------------------------------------------------------|
| measurement method |                              |                          |               | the way in which information is gathered and summarized by the technology about the patient's medication adherence                                                              |
|                    | direct observation method    |                          |               | measurement method consisting in observing medication intake directly                                                                                                           |
|                    | pill count method            |                          |               | measurement method consisting in calculating left over pills in containers/blisters at a specific time point                                                                    |
|                    | self report method           |                          |               | measurement method using data reported by patients or caregivers about themselves                                                                                               |
|                    |                              | diary                    |               | self-report method in which the respondent records information about their current behaviors, determinants or outcomes at regular intervals                                     |
|                    |                              | questionnaire            |               | self-report method in which the respondent answers a set of pre-designed questions about their behaviors, determinants or outcomes                                              |
|                    |                              | interview / consultation |               | self-report method in which the respondent answers questions, either pre-defined or spontaneous, from another individual as part of a structured conversation                   |
|                    | Electronic monitoring method |                          |               | measurement method using data from devices that record medication taking events electronically                                                                                  |
|                    |                              | smart package            |               | electronic monitoring method that uses data from a container/dispenser in which the medication is packaged                                                                      |
|                    |                              |                          | smart box     | smart package that includes a method to record the opening and closing of the box in which the medication is stored for use                                                     |
|                    |                              |                          | smart inhaler | smart package that includes a method to record the use of the inhaler device in which medication is stored for use                                                              |
|                    |                              |                          | smart tube    | smart package that includes a method to record the use of the tube in which medication in ointment or liquid form is stored for use                                             |
|                    |                              |                          | smart button  | smart package that includes a device attached to private pillbox where medication is stored for use and includes a button on which the person can press to record a dose intake |
|                    |                              | smart pill               |               | electronic monitoring method that uses data from a mechanism integrated in the medication itself that records the ingestion of the medication                                   |

|                    |                                       |                             |                           |                                                                                                                                                                            |
|--------------------|---------------------------------------|-----------------------------|---------------------------|----------------------------------------------------------------------------------------------------------------------------------------------------------------------------|
|                    |                                       | digital event record system |                           | digital technologies recording taking events (App, other devices)                                                                                                          |
|                    | Electronic Healthcare Database method |                             |                           | measurement method using routinely collected data as part of a longitudinal healthcare process                                                                             |
|                    |                                       | Electronic medical records  |                           | EHD method using data recorded in patients' medical records                                                                                                                |
|                    |                                       | Claims / dispensing         |                           | EHD method using data recorded for insurance claims purposes based on medication dispensed as part of the patients' care process                                           |
|                    |                                       | Record linkage system       |                           | EHD method using data recorded in several linked databases                                                                                                                 |
|                    | Laboratory method                     |                             |                           | measurement method based on clinical assessment through invasive procedure (e.g. body fluids samples)                                                                      |
|                    |                                       | drug concentration          |                           | laboratory methods consisting in the detection of sufficient drug levels in blood                                                                                          |
|                    |                                       |                             | intra patient variability | laboratory method indicating the fluctuation of drug concentration levels over a specific time period                                                                      |
|                    |                                       | biomarker                   |                           | laboratory method representing a surrogate for drug intake                                                                                                                 |
|                    |                                       | treatment response          |                           | laboratory method assessing clinical status as a proxy for adherence behaviours, e.g. habitus, lab results (blood glucose, Hba1c,) vital signs (blood pressure)            |
| measurement target |                                       |                             |                           | the component of the adherence causal (logic) model measured by the technology                                                                                             |
|                    | determinant measure                   |                             |                           | measurement targeting causal influences on the behaviour that can be modifiable (amenable to intervention with a medication adherence technology)                          |
|                    | behaviour measure                     |                             |                           | measurement targeting a self-management behaviour                                                                                                                          |
|                    |                                       | adherence measure           |                           | behaviour measure assessing to the patient's medication intake as compared to the prescribed regimen                                                                       |
|                    |                                       | alcohol intake measure      |                           | behaviour measure assessing the patient's intake of alcohol (frequency, type) on its own or in relation to treatment recommendations                                       |
|                    |                                       | diet measure                |                           | behaviour measure assessing the patient's intake of food (frequency, type) on its own or in relation to treatment recommendations                                          |
|                    |                                       | physical activity measure   |                           | behaviour measure assessing the patient's musculo-skeletal movements requiring energy expenditure (frequency, type) on its own or in relation to treatment recommendations |
|                    |                                       | tobacco use measure         |                           | behaviour measure assessing the patient's use of tobacco products                                                                                                          |































































1  
2  
3  
4  
5  
6  
7  
8  
9  
10  
11  
12  
13  
14  
15  
16  
17  
18  
19  
20  
21  
22  
23  
24  
25  
26  
27  
28  
29  
30  
31  
32  
33  
34  
35  
36  
37  
38  
39  
40  
41  
42  
43  
44  
45  
46

|  |  |  |
|--|--|--|
|  |  |  |
|  |  |  |
|  |  |  |
|  |  |  |
|  |  |  |
|  |  |  |
|  |  |  |
|  |  |  |
|  |  |  |
|  |  |  |

For peer review only

### DEVELOPMENT AND JUSTIFICATION

Throughout the last decades of medication adherence research, the mode of medication adherence measurement has evolved.

If a technology aims to monitor or measure adherence as part of the adherence management process it aims to facilitate, a broad range of options opens in terms of the measurement methods it can adopt, and which elements it targets, among those included in the causal (logic) model at the 'scientific core' of this process. To measure medication adherence, numerous methods have been developed: observing patients' medication intake directly, counting the remaining medication after a period of treatment, as well as various methods using self-report, electronic monitoring, electronic healthcare databases or laboratory tests. Moreover, measurement can target not only adherence behaviours but also adherence determinants, other self-management behaviours common in chronic care interventions (as described by Train4Health, a recent competency framework for the management of chronic conditions), and outcome measures such as health and quality of life. Users of the ENABLE repository may be interested to search for technologies that implement one type of measurement method, depending on the specificities of the setting in which they work (resources, acceptability, local expertise), or of the medication (e.g., mode of administration, pre-packaging). They may also be interested not only in measuring adherence behaviours, but also in technologies that integrate other elements of the causal model of self-management specific to the health condition they need to manage. Therefore, we have selected a range of measurement models (some of them with corresponding codes in SNOMED-CT, some based on methodological work in relevant domains), and followed the BCIO ontology and the Train4Health selection of self-management behaviours to offer the possibility to describe technologies from a measurement perspective.

1  
2  
3  
4  
5  
6  
7  
8  
9  
10  
11  
12  
13  
14  
15  
16  
17  
18  
19  
20  
21  
22  
23  
24  
25  
26  
27  
28  
29  
30  
31  
32  
33  
34  
35  
36  
37  
38  
39  
40  
41  
42  
43  
44  
45  
46

For peer review only

1  
2  
3  
4  
5  
6  
7  
8  
9  
10  
11  
12  
13  
14  
15  
16  
17  
18  
19  
20  
21  
22  
23  
24  
25  
26  
27  
28  
29  
30  
31  
32  
33  
34  
35  
36  
37  
38  
39  
40  
41  
42  
43  
44  
45  
46



For peer review only

1  
2  
3  
4  
5  
6  
7  
8  
9  
10  
11  
12  
13  
14  
15  
16  
17  
18  
19  
20  
21  
22  
23  
24  
25  
26  
27  
28  
29  
30  
31  
32  
33  
34  
35  
36  
37  
38  
39  
40  
41  
42  
43  
44  
45  
46

| Upper level       | Sub-level 1                | Sub-level 2       | Sub-level 3                   | Definition                                                                                                                                                                                                                               |
|-------------------|----------------------------|-------------------|-------------------------------|------------------------------------------------------------------------------------------------------------------------------------------------------------------------------------------------------------------------------------------|
| Printed material  | Brochure                   |                   |                               | Mode of delivery that involves use of printed material                                                                                                                                                                                   |
|                   |                            |                   |                               | Printed material mode of delivery that involves use of a printed publication within a brochure                                                                                                                                           |
|                   | Printed media              |                   |                               | Printed material mode of delivery that uses formats of printed media to communicate and share information                                                                                                                                |
|                   |                            | Poster            |                               | Printed media mode of delivery that involves display of a poster in a public location.                                                                                                                                                   |
|                   |                            | Newspaper/leaflet |                               | Printed media mode of delivery that involves use of a printed publication in a newspaper or leaflet.                                                                                                                                     |
| Human interaction |                            |                   |                               | Mode of delivery that involves a person as intervention source who interacts with an intervention recipient                                                                                                                              |
|                   | Face to face consultations |                   |                               | Human interactional mode of delivery that involves an intervention source and recipient being together in the same location and communicating directly.                                                                                  |
|                   | Networks/patient groups    |                   |                               | are groups that meet in person to discuss their 'issues' or experiences related to their health condition and or medication                                                                                                              |
| Electronic        |                            |                   |                               | Mode of delivery that involves electronic technology in the presentation of information or the mode of motivation to an intervention recipient                                                                                           |
|                   | Smart phone/tablet         |                   |                               | Electronic mode of delivery that involves communication processes                                                                                                                                                                        |
|                   |                            |                   | Call                          | Electronic mode of delivery that involves a communication process in which a signal is sent by a caller to a recipient to alert them of the communication intent, giving the recipient the opportunity to engage with the communication. |
|                   |                            |                   | interactive messaging or chat | Call mode of delivery that involves textual information in the communication through interactive messaging or chat                                                                                                                       |
|                   |                            |                   | sms -short text message       | Call mode of delivery that involves textual information in the communication.                                                                                                                                                            |
|                   |                            |                   | audio                         | Call mode of delivery that involves only audio information in the communication                                                                                                                                                          |
|                   |                            |                   | video                         | Call mode of delivery that involves video and audio information in the communication                                                                                                                                                     |
|                   |                            |                   | email                         | Electronic mode of delivery that involves communication by email.                                                                                                                                                                        |
|                   |                            |                   | application                   | Electronic mode of delivery that involves the intervention recipient interacting with a mobile application                                                                                                                               |

1  
2  
3  
4  
5  
6  
7  
8  
9  
10  
11  
12  
13  
14  
15  
16  
17  
18  
19  
20  
21  
22  
23  
24  
25  
26  
27  
28  
29  
30  
31  
32  
33  
34  
35  
36  
37  
38  
39  
40  
41  
42  
43  
44  
45  
46

|  |                            |                 |                                                                                                                                                                                                                                                                                      |
|--|----------------------------|-----------------|--------------------------------------------------------------------------------------------------------------------------------------------------------------------------------------------------------------------------------------------------------------------------------------|
|  |                            | interactivity   | Application mode of delivery that is interactive                                                                                                                                                                                                                                     |
|  |                            | diary           | Application mode of delivery that uses a diary to delivery a medication adherence intervention                                                                                                                                                                                       |
|  |                            | reminder system | Application mode of delivery that uses a reminder system to delivery a medication adherence intervention                                                                                                                                                                             |
|  |                            | gaming          | Application mode of delivery that uses gaming features to delivery a medication adherence intervention                                                                                                                                                                               |
|  | Wearable electronic device |                 | Electronic mode of delivery that includes medication related devices to support users to adhere to their treatment                                                                                                                                                                   |
|  | smart box                  |                 | smart package that records the opening and closing of the box in which the medication is stored for use                                                                                                                                                                              |
|  | smart inhaler              |                 | smart package that records the use of the inhaler device in which medication is stored for use                                                                                                                                                                                       |
|  | smart tube                 |                 | smart package that includes a method to record the use of the tube in which medication in ointment or liquid form is stored for use                                                                                                                                                  |
|  | smart button               |                 | smart package that includes a device attached to private pillbox where medication is stored for use and includes a button on which the person can press to record a dose intake                                                                                                      |
|  | digital media              |                 | Electronic mode of delivery that includes the use of electronic devices commonly used for mass-media communication                                                                                                                                                                   |
|  | Internet                   |                 | Electronic mode of delivery that involves presentation of information through the internet                                                                                                                                                                                           |
|  |                            | patient portals | Internet mode of delivery that allows patients to interact and communicate with other patients having the same health condition, treatment, and so on. these patient portals are not controlled on the quality of information shared and are available on the Internet at all hours. |
|  |                            | website         | Electronic mode of delivery that involves the intervention recipient interacting with a website.                                                                                                                                                                                     |
|  | social media               |                 | Electronic mode of delivery defined as online communication channels disseminate information to a huge audience world wide                                                                                                                                                           |
|  | broadcast media            |                 | Electronic mode of delivery that involves presentation of information through different mediums of media through a radio, television or billboard receiver.                                                                                                                          |
|  |                            | Radio           | Electronic mode of delivery that involves presentation of audio information that is broadcast and received by a radio receive                                                                                                                                                        |

1  
2  
3  
4  
5  
6  
7  
8  
9  
10  
11  
12  
13  
14  
15  
16  
17  
18  
19  
20  
21  
22  
23  
24  
25  
26  
27  
28  
29  
30  
31  
32  
33  
34  
35  
36  
37  
38  
39  
40  
41  
42  
43  
44  
45  
46

TV

Electronic mode of delivery that involves presentation of information that is broadcast and displayed by television

Billboard

Electronic mode of delivery that involves presentation of information by an electronic screen positioned in a public location.

|  |  |
|--|--|
|  |  |
|  |  |
|  |  |
|  |  |
|  |  |
|  |  |
|  |  |
|  |  |
|  |  |
|  |  |

For peer review only

### DEVELOPMENT AND JUSTIFICATION

Effective behaviour change interventions depend on a thorough evaluation and thoughtful selection of the mode of delivery of that specific intervention. The mode of delivery is defined as the 'physical or informational medium through which a given behaviour change intervention is provided'. To date, no ontology or other classification systems exist, to our knowledge, that categorize the mode of delivery of a medication adherence interventions. The Human Behaviour Change project, a collaborative research project aiming to create a 'Knowledge System' for using existing behaviour change interventions, is in process of creating ontologies to generate new insights about behaviour change. Within this project, scientists develop the Behaviour Change Intervention Ontology (BCIO), which is 'a set of definitions for entities and relationships used to describe behaviour change interventions, their contexts, effects and evaluations'. The modes of delivery attributes for the present repository were inspired from BCIO.



1  
2  
3  
4  
5  
6  
7  
8  
9  
10  
11  
12  
13  
14  
15  
16  
17  
18  
19  
20  
21  
22  
23  
24  
25  
26  
27  
28  
29  
30  
31  
32  
33  
34  
35  
36  
37  
38  
39  
40  
41  
42  
43  
44  
45  
46

|  |
|--|
|  |
|  |
|  |
|  |
|  |

For peer review only

|  |
|--|
|  |
|  |

1  
2  
3  
4  
5  
6  
7  
8  
9  
10  
11  
12  
13  
14  
15  
16  
17  
18  
19  
20  
21  
22  
23  
24  
25  
26  
27  
28  
29  
30  
31  
32  
33  
34  
35  
36  
37  
38  
39  
40  
41  
42  
43  
44  
45  
46

|  |  |
|--|--|
|  |  |
|  |  |
|  |  |

For peer review only

1  
2  
3  
4  
5  
6  
7  
8  
9  
10  
11  
12  
13  
14  
15  
16  
17  
18  
19  
20  
21  
22  
23  
24  
25  
26  
27  
28  
29  
30  
31  
32  
33  
34  
35  
36  
37  
38  
39  
40  
41  
42  
43  
44  
45  
46

For peer review only

1  
2  
3  
4  
5  
6  
7  
8  
9  
10  
11  
12  
13  
14  
15  
16  
17  
18  
19  
20  
21  
22  
23  
24  
25  
26  
27  
28  
29  
30  
31  
32  
33  
34  
35  
36  
37  
38  
39  
40  
41  
42  
43  
44  
45  
46

For peer review only

|  |  |  |
|--|--|--|
|  |  |  |
|  |  |  |

1  
2  
3  
4  
5  
6  
7  
8  
9  
10  
11  
12  
13  
14  
15  
16  
17  
18  
19  
20  
21  
22  
23  
24  
25  
26  
27  
28  
29  
30  
31  
32  
33  
34  
35  
36  
37  
38  
39  
40  
41  
42  
43  
44  
45  
46

|  |  |  |  |
|--|--|--|--|
|  |  |  |  |
|  |  |  |  |
|  |  |  |  |
|  |  |  |  |

For peer review only

| Upper Level                            | Sub-level 1 | Sub-level 2                                                     | Sub-level 3                 |
|----------------------------------------|-------------|-----------------------------------------------------------------|-----------------------------|
| individual-level behaviour determinant |             |                                                                 |                             |
|                                        | Capability  |                                                                 |                             |
|                                        |             | psychological capability                                        |                             |
|                                        |             |                                                                 | knowledge                   |
|                                        |             |                                                                 | psychological skills        |
|                                        |             |                                                                 | memory, attention, decision |
|                                        |             |                                                                 |                             |
|                                        |             |                                                                 | behavioral regulation       |
|                                        |             | physical capability/skills                                      |                             |
|                                        | Opportunity |                                                                 |                             |
|                                        |             | social opportunity/influences                                   |                             |
|                                        |             | physical opportunity/<br>environmental context and<br>resources |                             |
|                                        | Motivation  |                                                                 |                             |
|                                        |             | reflective motivation                                           |                             |
|                                        |             |                                                                 | role & identity             |

For peer review only

1  
2  
3  
4  
5  
6  
7  
8  
9  
10  
11  
12  
13  
14  
15  
16  
17  
18  
19  
20  
21  
22  
23  
24  
25  
26  
27  
28  
29  
30  
31  
32  
33  
34  
35  
36  
37  
38  
39  
40  
41  
42  
43  
44  
45  
46

beliefs about capabilities

optimism

beliefs about consequences

intentions

goals

automatic motivation

reinforcement

emotion

For peer review only

**Definition**

modifiable causal influences on medication adherence that reside within an individual person

behaviour determinant referring to what an individual can do themselves to take medication as agreed

behaviour determinant referring to the mental capabilities that help individuals themselves take medication as agreed

psychological capability referring to what an individual knows about taking medication as agreed for their condition

psychological capability referring to what an individual is good at doing to take medication as agreed

psychological capability referring to the individual's abilities to retain information, to focus on specific things, and to choose between different things that help individuals take medication as agreed

psychological capability referring to what an individual can do themselves to keep track of taking medication and change their habitual ways of doing this

behaviour determinant referring to the physical capabilities that help the individual take medication as agreed

behaviour determinant referring to the conditions in the individual's external environment that can facilitate medication adherence

behaviour determinant referring to the conditions in the social environment

behaviour determinant referring to the conditions in the physical environment

behaviour determinant referring to what extent the individual feels driven/willing/energised to take medication as agreed

behaviour determinant referring to the extent of feeling motivated to take medication as agreed by thinking about it

reflective motivation referring to how the individual perceives what they need to do and how they are in their social personal and/or professional environment



1  
2 reflective motivation referring to how the individual thinks about  
3 whether they can take their medication as agreed in various  
4 situations

5 reflective motivation referring to the confidence that the individual  
6 will succeed in their efforts to take medication and manage their  
7 condition

8 reflective motivation referring to what the individual thinks about  
9 the effects of taking medication on their health and/or other life  
10 goals

11 reflective motivation referring to whether the individual has taken a  
12 conscious decision to take medication as agreed

13 reflective motivation referring to how the individual represents in  
14 their mind the fact of taking medication as agreed, or other life goals  
15 related to their treatment

16 behaviour determinant referring to the extent of feeling motivated  
17 to take medication as agreed by emotions and impulses occurring  
18 automatically

19 automatic motivation referring to how taking medication as agreed  
20 is associated repeatedly to external stimuli that make it more likely  
21 to happen

22 automatic motivation referring to how taking medication as agreed  
23 is associated to individual's reactions to cope with personally  
24 significant stimuli

## DEVELOPMENT AND JUSTIFICATION

Numerous factors influencing medication adherence have been identified in the research literature. The term commonly employed in research is 'determinants of behaviour', and an important distinction is made between modifiable and non-modifiable determinants, depending on whether these are amenable to change by an intervention within the specific context. Modifiable determinants are also named 'mechanisms of action' when they are part of a behaviour change intervention scenario as a process through which change is affected on a behaviour. Among the determinants studied and targeted by adherence support interventions/technologies, most are patient-related, although several may be related to the therapy/medication, condition, socio-economic context, or the healthcare system. Patient-related adherence determinants include for example the individual's beliefs about the medication, their health condition, their habits and ways of coping with changes in routine.

A substantial body of research has been conducted using a diverse range of concepts, theories and frameworks from health psychology and behavioural medicine. This research resulted in a vast number of constructs, not all relevant for adherence. Therefore, a selection was necessary for the purposes of the ENABLE repository. Recently, these have been systematized via literature review and expert consensus in the Capability, Opportunity, Motivation and Behaviour (COM-B) model, Behaviour Change Wheel and the Theoretical Domains framework, a group of related tools aimed to facilitate the description and development of interventions and the synthesis of scientific evidence on behaviour change. These tools have been increasingly used in health research, including in supporting medication adherence. Three main categories of individual determinants are proposed in the COM-B model, each with two subcategories: Capability (psychological and physical), Opportunity (social and physical), and Motivation (reflective and automatic). For each subcategory, up to six theoretical domains of behaviour determinants have been identified by grouping similar constructs from different sources, resulting in a total of 14 distinct domains.

The terminology of behaviour determinants is currently evolving. Recently, 12 new categories have been added to the 14 TDF domains resulting in 26 mechanisms of action mapped onto the current classification of behaviour change techniques for evidence synthesis purposes. The Mechanisms of Action (MoA) Ontology is currently under development. Some determinant categories are named and structured differently in the MoA ontology version 1 as compared with COM-B and TDF structures, and the terminology is likely to continue to evolve in the following years. Therefore, we have adopted the COM-B/TDF classification, as it has been in use for research for the last years. Some simplifications have been applied from the structure proposed by Cane et al. (2012) to avoid duplication (i.e., the categories of role and identity and optimism were considered only in the reflective motivation category, although they can pertain also to automatic motivation); we kept the distinction between psychological skills and physical skills, as these are likely to be targeted separately in adherence technologies.

1  
2  
3  
4  
5  
6  
7  
8  
9  
10  
11  
12  
13  
14  
15  
16  
17  
18  
19  
20  
21  
22  
23  
24  
25  
26  
27  
28  
29  
30  
31  
32  
33  
34  
35  
36  
37  
38  
39  
40  
41  
42  
43  
44  
45  
46



For peer review only

| Upper Level          | Sub-Level 1               | Sub-Level 2                              | Definition                                                                                                                                                                            |                                                                                                                                                                                                                                                |
|----------------------|---------------------------|------------------------------------------|---------------------------------------------------------------------------------------------------------------------------------------------------------------------------------------|------------------------------------------------------------------------------------------------------------------------------------------------------------------------------------------------------------------------------------------------|
| Acting on Capability | Feedback and monitoring   |                                          | Group of behaviour change techniques aiming to influence what an individual can do themselves to take medication as agreed with the healthcare provider                               |                                                                                                                                                                                                                                                |
|                      |                           |                                          | The technology includes options to record medication intake and its effects, and feed this information back to the user                                                               |                                                                                                                                                                                                                                                |
|                      |                           | Biofeedback                              | The technology includes an option/activity to record physiological/biochemical effects of taking medication as agreed with the healthcare provider.                                   |                                                                                                                                                                                                                                                |
|                      |                           | Feedback or self-monitoring on behaviour | The technology includes an option/activity to monitor and feedback on adherence behaviours (by the medication users themselves or other people who can relay the information to them) |                                                                                                                                                                                                                                                |
|                      | Repetition & substitution |                                          | Feedback or self-monitoring on outcomes                                                                                                                                               | The technology includes an option/activity to monitor and feedback on a positive outcome of adherence behaviours (by the medication users themselves or other people who can relay the information to them)                                    |
|                      |                           |                                          |                                                                                                                                                                                       | The technology includes options/activities to perform certain actions repeatedly and systematically in order to enforce medication adherence behaviours and replace other behaviours not beneficial for medication adherence                   |
|                      |                           |                                          | habit formation                                                                                                                                                                       | The technology includes ways to prompt rehearsal and repetition of medication intake in the same context repeatedly at the planned time for intake, so that the context elicits adherence                                                      |
|                      |                           |                                          | behavioral practice/ rehearsal                                                                                                                                                        | The technology includes ways to prompt practice or rehearsal of medication intake in a context or at a time when it may not be necessary, in order to increase adherence habit and skill                                                       |
|                      |                           |                                          | graded tasks                                                                                                                                                                          | The technology includes options to set easy-to-perform tasks related to medication intake, making them increasingly difficult until adherence becomes achievable in all situations                                                             |
|                      |                           |                                          | Shaping knowledge                                                                                                                                                                     | The technology includes options for the user to learn about how to take medication as agreed with the healthcare provider, what they can do themselves to stick to the schedule in difficult situations, and test different ways of doing this |

1  
2  
3  
4  
5  
6  
7  
8  
9  
10  
11  
12  
13  
14  
15  
16  
17  
18  
19  
20  
21  
22  
23  
24  
25  
26  
27  
28  
29  
30  
31  
32  
33  
34  
35  
36  
37  
38  
39  
40  
41  
42  
43  
44  
45  
46

Acting on Opportunity

Demonstration of behaviour

Group of behaviour change techniques aiming to influence the conditions in the individual's external environment that can facilitate medication adherence

The technology includes an observable sample of how to take medication as agreed, directly in person or indirectly (video, pictures, drawings)

Prompts & cues

The technology includes ways to prompt medication intake at the agreed time

Restructuring the physical environment & adding objects

The technology includes advice on how to change the environment to make it easier to take medication as agreed with the healthcare provider.

Identity

The technology includes ways of strengthening a positive identity that includes taking medication as agreed with the healthcare provider.

Acting on Motivation

Goals and planning

Group of behaviour change techniques aiming to influence to what extent the individual feels driven/willing/energised to take medication as agreed with the healthcare provider.

The technology includes options to encourage setting goals related to adherence and planning to achieve them

Action planning

The technology includes an option/activity for the user to plan concretely how they will take the medication.

Discrepancy between current behaviour and goals

The technology includes an option/activity to compare the user's adherence-related goals with their current adherence behaviour

Goal setting & reviewing (behaviour)

The technology includes an option/activity to set or agree on a goal in terms of an adherence behaviour, and review this goal in light of achievement

Goal setting & reviewing (outcome)

The technology includes an option/activity to set or agree on a goal in terms of an outcome of adherence, and review this goal in light of achievement

Problem solving

The technology includes an option/activity to identify barriers & facilitators of their own adherence and propose solutions to overcome / increase them

pros & cons

The technology includes ways to identify and compare reasons for wanting or not wanting to take medication as agreed with the healthcare provider.

|    |                       |                             |                                                                      |
|----|-----------------------|-----------------------------|----------------------------------------------------------------------|
| 1  |                       |                             |                                                                      |
| 2  |                       | Regulation                  | The technology includes advice and/or options/activities aiming to   |
| 3  |                       |                             | keep motivation for medication adherence within a range favourable   |
| 4  |                       |                             | for performing adherence-related behaviours.                         |
| 5  |                       | conserving mental resources | The technology includes advice on how to make taking medication      |
| 6  |                       |                             | less demanding for the person                                        |
| 7  |                       | reducing negative emotions  | The technology includes ways of reducing negative emotions in        |
| 8  |                       |                             | relation to taking medication                                        |
| 9  |                       | Self-belief                 | The technology includes ways of increasing the person's confidence   |
| 10 |                       |                             | they can take medication as agreed with the healthcare provider.     |
| 11 |                       |                             |                                                                      |
| 12 |                       | Imaginary reward            | The technology includes advice on how to imagine correct             |
| 13 |                       |                             | performance of medication intake                                     |
| 14 |                       |                             | Group of behaviour change techniques aiming to influence             |
| 15 | Acting across domains |                             | determinants from more than one determinant group (capability,       |
| 16 |                       |                             | opportunity, motivation)                                             |
| 17 |                       |                             |                                                                      |
| 18 |                       | Social support (emotional   | The technology includes options to advise, arrange or provide social |
| 19 |                       | and practical)              | support (practical, emotional, other), or praise/reward taking       |
| 20 |                       |                             | medication as agreed with the healthcare provider.                   |
| 21 |                       | Social reward               | The technology includes verbal/non-verbal rewards when the patient   |
| 22 |                       |                             | shows effort and/or progress in taking medication as agreed with the |
| 23 |                       |                             | healthcare provider.                                                 |
| 24 |                       |                             |                                                                      |
| 25 |                       | Information about           | The technology includes information about consequences (health-      |
| 26 |                       | consequences                | related, emotional, social, environmental) of medication adherence   |
| 27 |                       |                             | (or non-adherence), and emphasise their relevance for the person     |
| 28 |                       |                             |                                                                      |
| 29 |                       |                             |                                                                      |
| 30 |                       |                             |                                                                      |
| 31 |                       |                             |                                                                      |
| 32 |                       |                             |                                                                      |
| 33 |                       |                             |                                                                      |
| 34 |                       |                             |                                                                      |
| 35 |                       |                             |                                                                      |
| 36 |                       |                             |                                                                      |
| 37 |                       |                             |                                                                      |
| 38 |                       |                             |                                                                      |
| 39 |                       |                             |                                                                      |
| 40 |                       |                             |                                                                      |
| 41 |                       |                             |                                                                      |
| 42 |                       |                             |                                                                      |
| 43 |                       |                             |                                                                      |
| 44 |                       |                             |                                                                      |
| 45 |                       |                             |                                                                      |
| 46 |                       |                             |                                                                      |

---

## DEVELOPMENT AND JUSTIFICATION

To trigger/support change in a health behaviour like medication adherence, interventions (whether mediated by technologies or not) act by generating change in determinants of the target behaviour. They do so in the same way that medications act on improving health outcomes by triggering changes in pathophysiological mechanisms of the health condition they aim to treat. The 'active ingredients' for behavioural health interventions have been labelled behaviour change techniques (BCT). For example, a reminder set within a medication adherence app on the user's smartphone to prompt medication intake at the agreed time is an application of a BCT in the category 'Prompts & cues', that acts on the 'Opportunity' group of determinants as it modifies the conditions in the user's environment that can facilitate medication adherence.

Evidence on effects of these BCTs on different behaviours has been accumulating and has been recently systematized based on the BCT taxonomy, a consensus classification of 93 BCTs that organizes theoretical constructs in this field (ref). The BCT taxonomy is currently part of the Human Behaviour Change Project and interoperable with the models and ontologies used in the other descriptor groups. It has been used extensively in the last decade in intervention description, development, validation and implementation, as well as in evidence synthesis and training of healthcare professionals.

However, not all techniques included in this taxonomy are relevant for medication adherence support. The ENABLE repository would need to include only BCTs relevant for adherence support technologies and be compatible with other tools used for behaviour change training and practice in healthcare systems.

Two applications of the BCT taxonomy to healthcare professional training on behaviour change simplify the structure and provide solutions for the ENABLE repository. The first, Cards for Change, is a simplified version of the taxonomy for development of training content for HCP behaviour change that has been used already in several countries as part of the Change Exchange Initiative (ref). It builds on a tool developed for coding training sessions in healthcare professional continuous education (ref) and includes the most used techniques in healthcare settings with examples of possible training activities. The second is the Train4health competency framework, a consensus-based framework for professionals who support self-management of chronic conditions in Europe developed by the Train4Health project, funded via the Erasmus+ programme (ref). The framework identified a set of 12 foundational competencies and 14 behaviour change competencies, including knowledge and abilities to identify relevant behaviours, intervention models, BCTs and apply these collaboratively to develop and implement self-management programmes. A panel of experts selected the most relevant BCTs for the 5 priority behaviours, including medication adherence support, physical activity, diet, smoking cessation and symptom monitoring and management.

We have therefore selected 24 categories of BCTs consistent with the selections operated by the Train4Health consortium and the Cards for Change team, to align the terminology with healthcare professionals training programmes that are currently using or will be developed in the future using these tools. Some BCT categories were merged due to common co-occurrence (e.g., feedback and monitoring; shaping knowledge techniques), and some BCTs are present in C4C but not in T4H since the former is more comprehensive than the latter. The initial ENABLE descriptor list includes only user-level BCTs (i.e., BCTs that can be included in technologies that provide support to medication users); if considered relevant, future versions can include HCP-level interventions (e.g., training programmes) or organisation/system-level BCTs. To align this set of descriptors with the ones referring to adherence determinants, we have grouped the 24 categories into 4 dimensions (i.e., acting on Capability, Opportunity, Motivation, cross domains), using the theoretical mapping described by Cane et al. and previously applied in evidence synthesis in health behaviour change. Mapping work is ongoing and likely to be updated with further iterations of these ontologies. We have therefore chosen the terms most used currently and expect back-compatibility in future versions.

It is important to note that a new classification by WHO is currently under development for health interventions which includes terminology for behavioural interventions: International Classification of Health Interventions (ICHI). Currently, ICHI is designed to be interoperable with the COM-B model via a series of extension codes. However, for describing categories of health interventions, the ICHI classification uses over 20 terms, different from the behaviour change literature, that cover measurement (Assessment, Testing), several broader categories on individual-level intervention

1 from the behaviour change literature, that cover measurement (Assessment, Testing), several broader categories on individual-level intervention  
2 (Training, Education, Advising, Counselling, Emotional support, Provision of products to support, Provision of peer support), as well as health system and  
3 societal level interventions (Providing opportunities for participation, Advocacy, Building partnerships, Public facilities, Environment modification,  
4 Capacity building, Awareness raising, Public health surveillance, Health alerts, Enactment and enforcement of legislation, Economic and non-economic  
5 incentives, Policy change, Other). Ensuring interoperability between ICHI and the BCIO ontologies is under discussion.  
6  
7  
8  
9  
10  
11  
12  
13  
14  
15  
16  
17  
18  
19  
20  
21  
22  
23  
24  
25  
26  
27  
28  
29  
30  
31  
32  
33  
34  
35  
36  
37  
38  
39  
40  
41  
42  
43  
44  
45  
46

For peer review only



1  
2  
3  
4  
5  
6  
7  
8  
9  
10  
11  
12  
13  
14  
15  
16  
17  
18  
19  
20  
21  
22  
23  
24  
25  
26  
27  
28  
29  
30  
31  
32  
33  
34  
35  
36  
37  
38  
39  
40  
41  
42  
43  
44  
45  
46

| Upper level              | Sub-level 1                    | Sub-level 2                                          |
|--------------------------|--------------------------------|------------------------------------------------------|
| health care professional |                                |                                                      |
|                          | medical doctor                 |                                                      |
|                          |                                | generalist medical practitioner                      |
|                          |                                | specialist medical practitioner                      |
|                          | nursing professional           |                                                      |
|                          | midwifery professional         |                                                      |
|                          | pharmacist                     |                                                      |
|                          |                                | community pharmacist<br>hospital/clinical pharmacist |
|                          | dentist                        |                                                      |
|                          | associated health professional |                                                      |
|                          |                                | community healthcare worker                          |

For peer review only

1  
2  
3  
4  
5  
6  
7  
8  
9  
10  
11  
12  
13  
14  
15  
16  
17  
18  
19  
20  
21  
22  
23  
24  
25  
26  
27  
28  
29  
30  
31  
32  
33  
34  
35  
36  
37  
38  
39  
40  
41  
42  
43  
44  
45  
46

health care assistant

psychosocial care professional

psychologist

Personal care worker

Personal provider

family member

parent or guardian

spouse or partner

other

carer

friend

peer

For peer review only

**Definition**

An intervention provider that applies scientific knowledge in medicine, nursing, midwifery, pharmacy, dentistry and/or health promotion to support patients in

A health professional that studies, diagnoses, treats and prevents illness, disease, injury and other physical and mental impairments.

A medical doctor that does not limit their practice to certain disease categories or methods of treatment, and may assume responsibility for the provision of continuing and comprehensive medical care to individuals, families and communities

A medical doctor that specializes in certain disease categories, types of patients or methods of treatment and may conduct medical education and research in their chosen areas of specialization.

A health professional that provides treatment, support and care services for people who are in need of nursing care due to the effects of ageing, injury, illness or other physical or mental impairment, or potential risks to health.

A health professional that plans, manages, provides and evaluates midwifery care services before, during and after pregnancy and childbirth.

A health professional that stores, preserves, compounds and dispenses medicinal products and counsel on the proper use and adverse effects of drugs and medicines following prescriptions issued by medical doctors and other health professionals.

A pharmacist that practices in primary care/ community settings.

A pharmacist that practices in secondary care / hospital settings.

A health professional that diagnoses treats and prevents diseases, injuries and abnormalities of the teeth, mouth, jaws and associated tissues.

A health professional that performs technical and practical tasks to support diagnosis and treatment of illness, disease, injuries and impairments, and supports the implementation of health care usually established by medical, nursing and other health professionals

Associated health professional that provides health education, referral and follow-up, case management, basic preventive health care and home visiting services to specific communities.

1  
2 Associated health professional that provides basic care services for the  
3 prevention and treatment of diseases and disorders, according to care plans  
4 and procedures established by medical, nursing or other health professionals.  
5

6 An intervention provider that applies scientific knowledge in psychology,  
7 sociology and other social sciences to support individuals and families in a  
8 community in their well-being and life goals  
9

10 A social professional that studies the mental processes and behaviour of human  
11 beings as individuals or in groups, and applies this knowledge to promote  
12 personal, social, educational or occupational adjustment and development  
13

14 An intervention provider that delivers care, supervision and assistance for  
15 children, patients and elderly, convalescent or disabled persons in institutional  
16 and residential settings.  
17

18 an intervention provider that is related to the person to whom the intervention  
19 is targeted through aspects of their personal lives.

20 A personal provider who is related to another person as they are descended  
21 from a common progenitor, related by marriage or other legal tie, or by a  
22 feeling of closeness.

23 A family member that is a mother, father or legal carer of the person to whom  
24 the intervention is targeted

25 A family member that is an individual who is married or in a committed  
26 relationship with the person to whom the intervention is targeted

27 A family member that is a child, sibling or in the extended family (e.g. uncle,  
28 aunt, nephew) with the person to whom the intervention is targeted  
29

30  
31 A personal provider who is an individual who cares, unpaid, for a friend or  
32 family member who is the person to whom the intervention is targeted

33 A personal provider who is an individual who is known, liked and trusted by the  
34 person to whom the intervention is targeted, typically exclusive of sexual or  
35 family relations

36 A personal provider who is described as similar to the person to whom the  
37 intervention is targeted on the basis of similarities in age, social status, gender,  
38 experience, health status  
39  
40  
41  
42  
43  
44  
45  
46

1  
2  
3  
4  
5  
6  
7  
8  
9  
10  
11  
12  
13  
14  
15  
16  
17  
18  
19  
20  
21  
22  
23  
24  
25  
26  
27  
28  
29  
30  
31  
32  
33  
34  
35  
36  
37  
38  
39  
40  
41  
42  
43  
44  
45  
46

**DEVELOPMENT AND JUSTIFICATION**

The provider or source of intervention is a role played by a person, population or organization that provides/delivers a given intervention. This includes their occupational role, education, sociodemographic, knowledge, skills and any relatedness between them and the target population. In terms of medication adherence, the provider is often HCP. The quality of the HCP-patient relationships, especially communication skills, collaborative decision making, trust in the HCP and HCPs’ cultural competences, are in correlation with patients’ adherence. Several different professions of intervention providers were recognized as the most influential OR relevant in relation to medication adherence of patients using the Intervention Source Ontology Coding Guidelines and Gender, Sex, and Sexual Orientation (GSSO) ontology.

For peer review only

| Upper level      | Sub-level 1          | Sub-level 2                      | Sub-level 3                         | Definition                                                                                                                                                                                                  |
|------------------|----------------------|----------------------------------|-------------------------------------|-------------------------------------------------------------------------------------------------------------------------------------------------------------------------------------------------------------|
| Physical setting |                      |                                  |                                     | Intervention setting that consists in a physical environment where the medication adherence technology is used.                                                                                             |
|                  | Residential facility |                                  |                                     | A physical setting that has at least one housing unit as part in which a person to whom the intervention is targeted lives.                                                                                 |
|                  |                      | Household residence              |                                     | Residential facility where a person to whom the intervention is targeted lives alone or with one or more persons.                                                                                           |
|                  |                      |                                  | Residential care or assisted living | Household residence where many vulnerable persons live.                                                                                                                                                     |
|                  |                      |                                  | Student residence                   | Household residence where many students live.                                                                                                                                                               |
|                  | Healthcare facility  |                                  |                                     | A physical setting that is administered by a health care organisation for the purpose of providing health care to a patient population.                                                                     |
|                  |                      | Hospital facility                |                                     | healthcare facility that is run by a hospital organisation and is the bearer of a hospital function.                                                                                                        |
|                  |                      | Doctor-led primary care facility |                                     | A healthcare facility led by doctors                                                                                                                                                                        |
|                  |                      | Care home facility               |                                     | A healthcare facility that is run by a care home organization and is the bearer of a care home function                                                                                                     |
|                  |                      | Hospice facility                 |                                     | A healthcare facility that bears a function to provide healthcare to the sick or terminally ill                                                                                                             |
|                  |                      | Pharmacy facility                |                                     | A healthcare facility whose function is to store, prepare, dispense and monitor the usage of pharmaceutical drugs among patients in a given area or encountered in a given healthcare provider organization |
|                  |                      | Psychiatric facility             |                                     | A healthcare facility designed and staffed to house and treat individuals that need assistance with mental health                                                                                           |
|                  |                      | Community healthcare facility    |                                     | A healthcare facility providing healthcare services to people in a certain area.                                                                                                                            |
|                  | Educational facility | Dentist facility                 |                                     | A healthcare facility where dental healthcare is provided                                                                                                                                                   |
|                  |                      |                                  |                                     | A physical setting in which formal education is provided to a student population                                                                                                                            |

1  
2  
3  
4  
5  
6  
7  
8  
9  
10  
11  
12  
13  
14  
15  
16  
17  
18  
19  
20  
21  
22  
23  
24  
25  
26  
27  
28  
29  
30  
31  
32  
33  
34  
35  
36  
37  
38  
39  
40  
41  
42  
43  
44  
45  
46

Community facility

A physical setting used by a group of people living in the same area or having a particular characteristic in common

Social centre or Community Hall facility

A community facility used for socialising by those living in a given area.

Virtual setting

Intervention setting that consists in a virtual environment where the medication adherence technology is used.

Telemedicine

Virtual setting through which healthcare services are delivered by medical doctors

Telepharmacy

Virtual setting through which healthcare services are delivered by pharmacists

For peer review only

#### DEVELOPMENT AND JUSTIFICATION

Implementation and behavioral science emphasize the importance of understanding and describing the environment in which a certain intervention is delivered as it can significantly influence its outcomes. In addition, not every intervention is applicable or transferable to every setting. Similar to the mode of delivery, we can distinguish between physical and virtual settings. Healthcare services may be provided in different healthcare facilities using different technologies and adherence intervention models. Thus, the efficacy of direct in-person models of adherence intervention may be different than indirect interventions such as electronic strategies. Some interventions may be applicable in both types of settings, or require a combination of physical and virtual settings in order to be performed. The classification was made using the Intervention Setting Ontology, which is a component of the Behaviour Change Interventions Ontology (BCIO).

For peer review only



1  
2  
3  
4  
5  
6  
7  
8  
9  
10  
11  
12  
13  
14  
15  
16  
17  
18  
19  
20  
21  
22  
23  
24  
25  
26  
27  
28  
29  
30  
31  
32  
33  
34  
35  
36  
37  
38  
39  
40  
41  
42  
43  
44  
45  
46  
47  
48  
49  
50  
51  
52  
53  
54  
55  
56  
57  
58  
59  
60

| Upper Level                       | Sub-Level 1                         | Sub-Level 2                     |
|-----------------------------------|-------------------------------------|---------------------------------|
| D3.1.1 General quality indicators | ISO certification                   | Research base on development    |
|                                   | Evidence from scientific evaluation | Research base on effectiveness  |
|                                   |                                     | Ethical and legal aspects       |
|                                   | Development standards               | Development process             |
|                                   |                                     | User-centered design process    |
|                                   |                                     | Conflict of Interest            |
|                                   |                                     | Updating of information sources |
|                                   | Technological standards             | Performance                     |
|                                   |                                     | Data protection                 |

1  
2  
3  
4  
5  
6  
7  
8  
9  
10  
11  
12  
13  
14  
15  
16  
17  
18  
19  
20  
21  
22  
23  
24  
25  
26  
27  
28  
29  
30  
31  
32  
33  
34  
35  
36  
37  
38  
39  
40  
41  
42  
43  
44  
45  
46  
47  
48  
49  
50  
51  
52  
53  
54  
55  
56  
57  
58  
59  
60

D3.1.2 Research-related quality indicators



System integration testing

Inter-device portability

Theory base

Measurement validity

content validity

Intervention validity

coherence of the intervention model

Measurement reliability

Internal consistency

Inter-rater reliability

Test-retest reliability

D3.1.3 Policy-related quality indicators

Cost and economic evaluation

Cost-effectiveness

1  
2  
3  
4  
5  
6  
7  
8  
9  
10  
11  
12  
13  
14  
15  
16  
17  
18  
19  
20  
21  
22  
23  
24  
25  
26  
27  
28  
29  
30  
31  
32  
33  
34  
35  
36  
37  
38  
39  
40  
41  
42  
43  
44  
45  
46  
47  
48  
49  
50  
51  
52  
53  
54  
55  
56  
57  
58  
59  
60

- Cost-utility
- Cost-consequence
- Cost-benefit
- Cost-minimisation
- Budget impact
- Country(ies) where evaluation performed
- Current use of the technology
- Regulatory status
- Usability
  - Simplicity
  - Cleanliness
  - Intuitiveness
  - Reliability

D3.1.4 Use-related quality indicators

1  
2  
3  
4  
5  
6  
7  
8  
9  
10  
11  
12  
13  
14  
15  
16  
17  
18  
19  
20  
21  
22  
23  
24  
25  
26  
27  
28  
29  
30  
31  
32  
33  
34  
35  
36  
37  
38  
39  
40  
41  
42  
43  
44  
45  
46  
47  
48  
49  
50  
51  
52  
53  
54  
55  
56  
57  
58  
59  
60

Satisfaction

Satisfaction test

Customisation

Customisation of language

Aesthetics

Readability

For peer review only

1  
2  
3  
4  
5  
6  
7  
8  
9  
10  
11  
12  
13  
14  
15  
16  
17  
18  
19  
20  
21  
22  
23  
24  
25  
26  
27  
28  
29  
30  
31  
32  
33  
34  
35  
36  
37  
38  
39  
40  
41  
42  
43  
44  
45  
46  
47  
48  
49  
50  
51  
52  
53  
54  
55  
56  
57  
58  
59  
60

**Sub-Level 3**                      **Sub-Level 4**

Quality of evidence on development

Quality of evidence on effectiveness

Usability tests

Reliability of interactive components  
Design scalability of the technology

For peer review only

1  
2 Data encryption  
3

4  
5 Antivirus with supported  
6 maintenance  
7

8  
9 Data storage place  
10

11 Data storage capacity  
12 Protection against theft  
13 or physical attacks  
14  
15  
16  
17  
18  
19  
20  
21  
22  
23  
24  
25  
26  
27

28  
29 face validity  
30

31  
32 language validation  
33

34 target population  
35 validation  
36  
37  
38  
39  
40  
41  
42  
43  
44  
45  
46  
47  
48  
49  
50  
51  
52  
53  
54  
55  
56  
57  
58  
59  
60

For peer review only

1  
2 vs no intervention  
3  
4 vs other interventions  
5

6  
7  
8  
9  
10  
11  
12  
13  
14

15  
16  
17  
18  
19  
20  
21  
22  
23  
24  
25

26  
27  
28  
29  
30  
31  
32  
33

34  
35 Authorisation status  
36  
37 Country(ies) where  
38 approved  
39 Approval body(ies)

40  
41 Indication(s) approved  
42  
43 Reimbursement status  
44  
45 Country(ies) where  
46 Indication(s) reimbursed  
47  
48  
49

50  
51  
52  
53  
54  
55  
56  
57  
58  
59  
60

For peer review only

1  
2  
3  
4  
5  
6  
7  
8  
9  
10  
11  
12  
13  
14  
15  
16  
17  
18  
19  
20  
21  
22  
23  
24  
25  
26  
27  
28  
29  
30  
31  
32  
33  
34  
35  
36  
37  
38  
39  
40  
41  
42  
43  
44  
45  
46  
47  
48  
49  
50  
51  
52  
53  
54  
55  
56  
57  
58  
59  
60

For peer review only



**Definition**

Quality indicators that evaluate MATech characteristics relevant for all stages of the technology development, adoption and use.

General QI referring to whether the MATech has obtained one or more ISO certification labels relevant for its content and purpose.

General QI referring to whether the MATech has been evaluated through the systematic, rigorous, and meticulous application of scientific methods, and the evidence obtained

Evidence from scientific evaluation is available to support the design of the MATech.

Attribute of the research base on development referring to the "grade (or strength) of recommendation", decided based on levels of evidence (sometimes called hierarchy of evidence) assigned to studies based on the methodological quality of their design, validity, and applicability to patient care.

Evidence from scientific evaluation is available to support the effectiveness of the MATech (excluding cost-effectiveness, outlined in section D2.1.3 and implementation outcomes, outlined in section D3.2).

Attribute of the research base on effectiveness referring to the "grade (or strength) of recommendation", decided based on levels of evidence (sometimes called hierarchy of evidence) assigned to studies based on the methodological quality of their design, validity, and applicability to patient care.

Attribute of the scientific evaluation of the MATech referring to whether the research has ethical approval, has considered and addressed any risks for the target population, complies with the current laws on research on humans and data privacy and safety, and has shared information about how it meets these requirements.

General QI referring to whether the MATech has been developed according to standards established in the development of health technologies.

All development activities undertaken with respect to MATech are clearly described, such as activities related to preparation, development and optimization of product components as well as the manufacturing, validation and distribution process.

The MATech was developed in an iterative design process in which designers involved the target users and their needs in each phase of the design process. The users' requirements, objectives, and feedback were taken into account during the development process.

Usability tests were performed and the results are available (e.g., described or available on a link) with a statement, how the findings influenced the MATech.

The provider's conflicts of interest are clearly described, if any, to ensure trust and transparency.

Information sources are periodically verified (proven to still be correct and accurate) and updated (new information added or design changed).

General QI referring to whether a MATech corresponds to criteria commonly used to assess the technical functioning of electronic components, if applicable.

The MATech works fast and accurately without bugs or errors.

The interactive components (e.g. alarm system) are secure and these characteristics are maintained even when the system grows.

The MATech shows efficiency even with a large volume of users / data.

Collected data are properly protected to prevent sensible data leakage.

1  
2 Encrypting takes a part of the data and translates it into a new form so that only  
3 people with access to the key can read it, in order to protect the confidentiality of  
4 digital data.

5 The MATEch has software installed for data protection against online theft and  
6 attacks, and regularly revised to fulfil the function of acting against malicious code or  
7 programs.

8 Data storage on MATEch devices is not connected to network to further ensure data  
9 safety against network attacks.

10 How much storage space is provided by the MATEch to contain data.

11 The MATEch has measures in place for protection against burglary, theft, vandalism  
12 and terrorism.

13 The developed MATEch conforms to the requirements in terms of technical, privacy  
14 and security requirements of health care systems.

15 The MATEch can be connected with several other devices.

16 Quality indicators that evaluate if the research on the MATEch has been performed  
17 according to standards established in measurement and intervention research.

18 The MATEch is developed based on theory, evidence, and/or theoretical frameworks.

19 The MATEch measurement components measure exactly what they propose to  
20 measure (the used measure represents the intended variable)

21 Type of validity referring to the extent to which a measure in the MATEch “covers” the  
22 construct of interest

23 Type of content validity referring to the extent to which a measurement method in the  
24 MATEch appears “on its face” to measure the construct of interest.

25 Type of content validity referring to whether the MATEch and corresponding materials  
26 were validated for the available languages.

27 Type of content validity referring to the whether the MATEch was tested and validated  
28 for the target population.

29 The MATEch intervention components have the potential to influence the  
30 behaviour determinants they target.

31 The use of behaviour change techniques in the intervention components of the  
32 MATEch is evidence based, i.e. there is scientific evidence that the chosen techniques  
33 are likely to be effective in influencing the chosen behaviour determinants.

34 The MATEch measurement components reproduce a measurement result consistently  
35 in time and space.

36 Type of measurement reliability referring to the consistency across items or indicators  
37 of the same construct

38 Type of measurement reliability referring to consistency across different researchers

39 Type of measurement reliability referring to the consistency over time

40 Quality indicators related to Health Technology Assessment (HTA) procedures and  
41 concepts that inform decision-making regarding implementation and use of health  
42 technologies.

43 an economic analysis has been performed to inform value-for-money judgements  
44 about the MATEch with information about costs, health-related outcomes and  
45 economic efficiency

46 CEE that examines the costs and health outcomes of one or more interventions, to  
47 estimate how much it costs to gain a unit of a health outcome, like a life year gained or  
48 a death prevented.

1  
2 Cost-effectiveness analysis where the control group is represented by a population  
3 receiving no intervention (treatment as usual)  
4 Cost-effectiveness analysis where the control group is represented by a  
5 population receiving other interventions.  
6 CEE in which the incremental cost of a technology from a particular point of view is  
7 compared to the incremental health improvement expressed in the unit of quality  
8 adjusted life years (QALYs)  
9  
10 CEE in which a wide range of costs and consequences (effects) of the technology is  
11 assessed and reported separately. It includes all types of effects, including health, non-  
12 health, negative and positive effects, both to patients and other parties (e.g.,  
13 caregivers).  
14 CEE consisting of a systematic process to sum the potential rewards expected from the  
15 technology and then subtract the total costs associated with that technology; some  
16 analysts also build models to assign a monetary value on intangible items.  
17  
18 CEE consisting of applying basic rules to determine what mix of labor and capital  
19 produces output at the lowest cost, i.e., what the most cost-effective method of  
20 delivering goods and services would be while maintaining a desired level of quality.  
21  
22  
23 CEE that estimates the financial consequences of adopting a new technology which is  
24 usually performed in addition to a cost-effectiveness analysis; it evaluates whether the  
25 high-value intervention is affordable.  
26  
27 Healthcare system or country where the economic evaluation has been performed  
28  
29 Specifies the regulatory status (authorization and reimbursement) of the technology.  
30 These information are country or system specific, thus the repository also needs to  
31 specify where these indicators apply.  
32 The stage in which the MATech is in the process of obtaining necessary authorisations  
33 and being considered for reimbursement by authorities in order to be adopted in  
34 routine practice in a health system or country.  
35 HTA CUR indicator specifying whether the technology is approved for clinical use by an  
36 appropriate local regulator via marketing authorisation and/or CE marking.  
37 Healthcare system or country where the technology has received authorization.  
38  
39 Name of the body which has issued the technology approval for clinical use in the  
40 respective country (eg., NICE)  
41 Diagnoses, clinical conditions or social conditions for which the MATech has been  
42 approved for clinical use  
43 HTA CUR indicator specifying whether the technology cost is fully or partially covered  
44 for the patient by a reimbursement authority (eg., NHS, insurance company)  
45 Healthcare system or country where the technology is reimbursed.  
46 Diagnoses, clinical conditions or social conditions for which the technology is  
47 reimbursed  
48  
49 Quality indicators that evaluate if the MATech meets users expectations and provides  
50 a pleasurable experience of interaction with the technology.  
51 The MATech is easy to use, and easy to learn or understand, as assessed in objective  
52 ways (as opposed to user-friendliness, which is subjective).  
53 The interface is not overly complex, but instead is straightforward, providing quick  
54 access to common features or commands.  
55 The interface is well-organized, making it easy to locate different tools and options.  
56  
57  
58 The interface makes sense to the average user, requires minimal explanation for use,  
59 and provides clear explanations for how to use it.  
60 The MATech is reliable and does not malfunction or crash.

1  
2 The level of satisfaction of the end user with the MATEch has been explored and found  
3 appropriate.

4 The manner in which the level of satisfaction from the patient with the MATEch was  
5 assessed, e.g. online or telephone survey about satisfaction made by research staff.  
6

7 The MATEch or some parts of it can be customized to the needs of the individual user.  
8

9 The MATEch gives the option to customize language to adapt to different users.

10 The MATEch has been evaluated as aesthetic (size, layout, graphic, font size etc.  
11 support the use of MATEch) in a research project or external review.  
12

13 The text included in the MATEch is written in a style easy to understand, i.e. readers  
14 are able to recognize (decode) the words as well as comprehend the meaning of the  
15 text.  
16  
17  
18  
19  
20  
21  
22  
23  
24  
25  
26  
27  
28  
29  
30  
31  
32  
33  
34  
35  
36  
37  
38  
39  
40  
41  
42  
43  
44  
45  
46  
47  
48  
49  
50  
51  
52  
53  
54  
55  
56  
57  
58  
59  
60

For peer review only

---

### DEVELOPMENT AND JUSTIFICATION

Quality indicators are standardized, evidence-based, and measurable items for monitoring and evaluating the quality of healthcare performance. With their statement about the structure, process, or outcomes of care, review criteria and standards can be developed to help operationalize quality indicators.

No classification or list of criteria could be identified in the literature that provides a formal description of quality indicators specific to medication adherence technologies. However, several related sets of criteria refer to ehealth applications in general -such as the Mobile Application Rating Scale (MARS)- or guide reporting of research on ehealth applications -such as the Consort-EHEALTH guideline. These checklists and guidelines include relevant concepts of technology quality but are neither comprehensive nor specific to medication adherence technologies. MATech represent an important type of health technology and therefore should adopt HTA procedures and concepts to inform decision-making regarding their implementation and use. Two HTA domains were considered relevant for MATech: (i) Cost and economic evaluation (ECO) informs value-for-money appraisal with information about costs, health-related outcomes and economic efficiency; (ii) Current use of technology (CUR), specifies the authorization and reimbursement status of the technology. The indicators in both domains are often country or system specific, thus the repository also needs to specify where these indicators apply. Other HTA domains include assessment elements that are either captured in other attribute groups or not applicable to MATech. Therefore, we decided to develop a checklist for assessing the quality of ehealth applications, building on the work of an ongoing project involving a systematic review of existing items and criteria in the literature. We synthesized the quality indicators identified in this work into a comprehensive list and adapted the items to be appropriate for medication adherence technologies for the ENABLE repository. This new list of items was discussed, adjusted, concretized, and refined in several rounds with SC members, and additional constructs were generated until consensus was reached.

As MATech follow different stages of development and implementation and need to meet quality standards specific or common to all stages, from research to adoption by decision-makers to routine use in specific settings, we decided to group quality indicators according to their relevance to these stages. We considered some indicators relevant to all stages, while others would be likely to be more research-related, policy-related, or use-related.

1  
2  
3  
4  
5  
6  
7  
8  
9  
10  
11  
12  
13  
14  
15  
16  
17  
18  
19  
20  
21  
22  
23  
24  
25  
26  
27  
28  
29  
30  
31  
32  
33  
34  
35  
36  
37  
38  
39  
40  
41  
42  
43  
44  
45  
46  
47  
48  
49  
50  
51  
52  
53  
54  
55  
56  
57  
58  
59  
60

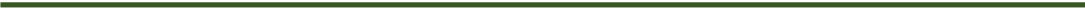

For peer review only

1  
2  
3  
4  
5  
6  
7  
8  
9  
10  
11  
12  
13  
14  
15  
16  
17  
18  
19  
20  
21  
22  
23  
24  
25  
26  
27  
28  
29  
30  
31  
32  
33  
34  
35  
36  
37  
38  
39  
40  
41  
42  
43  
44  
45  
46  
47  
48  
49  
50  
51  
52  
53  
54  
55  
56  
57  
58  
59  
60

For peer review only

1  
2  
3  
4  
5  
6  
7  
8  
9  
10  
11  
12  
13  
14  
15  
16  
17  
18  
19  
20  
21  
22  
23  
24  
25  
26  
27  
28  
29  
30  
31  
32  
33  
34  
35  
36  
37  
38  
39  
40  
41  
42  
43  
44  
45  
46  
47  
48  
49  
50  
51  
52  
53  
54  
55  
56  
57  
58  
59  
60

For peer review only



1  
2  
3  
4  
5  
6  
7  
8  
9  
10  
11  
12  
13  
14  
15  
16  
17  
18  
19  
20  
21  
22  
23  
24  
25  
26  
27  
28  
29  
30  
31  
32  
33  
34  
35  
36  
37  
38  
39  
40  
41  
42  
43  
44  
45  
46  
47  
48  
49  
50  
51  
52  
53  
54  
55  
56  
57  
58  
59  
60

For peer review only

1  
2  
3  
4  
5  
6  
7  
8  
9  
10  
11  
12  
13  
14  
15  
16  
17  
18  
19  
20  
21  
22  
23  
24  
25  
26  
27  
28  
29  
30  
31  
32  
33  
34  
35  
36  
37  
38  
39  
40  
41  
42  
43  
44  
45  
46  
47  
48  
49  
50  
51  
52  
53  
54  
55  
56  
57  
58  
59  
60

For peer review only

1  
2  
3  
4  
5  
6  
7  
8  
9  
10  
11  
12  
13  
14  
15  
16  
17  
18  
19  
20  
21  
22  
23  
24  
25  
26  
27  
28  
29  
30  
31  
32  
33  
34  
35  
36  
37  
38  
39  
40  
41  
42  
43  
44  
45  
46  
47  
48  
49  
50  
51  
52  
53  
54  
55  
56  
57  
58  
59  
60

For peer review only

1  
2  
3  
4  
5  
6  
7  
8  
9  
10  
11  
12  
13  
14  
15  
16  
17  
18  
19  
20  
21  
22  
23  
24  
25  
26  
27  
28  
29  
30  
31  
32  
33  
34  
35  
36  
37  
38  
39  
40  
41  
42  
43  
44  
45  
46  
47  
48  
49  
50  
51  
52  
53  
54  
55  
56  
57  
58  
59  
60

For peer review only

1  
2  
3  
4  
5  
6  
7  
8  
9  
10  
11  
12  
13  
14  
15  
16  
17  
18  
19  
20  
21  
22  
23  
24  
25  
26  
27  
28  
29  
30  
31  
32  
33  
34  
35  
36  
37  
38  
39  
40  
41  
42  
43  
44  
45  
46  
47  
48  
49  
50  
51  
52  
53  
54  
55  
56  
57  
58  
59  
60

For peer review only

1  
2  
3  
4  
5  
6  
7  
8  
9  
10  
11  
12  
13  
14  
15  
16  
17  
18  
19  
20  
21  
22  
23  
24  
25  
26  
27  
28  
29  
30  
31  
32  
33  
34  
35  
36  
37  
38  
39  
40  
41  
42  
43  
44  
45  
46  
47  
48  
49  
50  
51  
52  
53  
54  
55  
56  
57  
58  
59  
60

For peer review only

1  
2  
3  
4  
5  
6  
7  
8  
9  
10  
11  
12  
13  
14  
15  
16  
17  
18  
19  
20  
21  
22  
23  
24  
25  
26  
27  
28  
29  
30  
31  
32  
33  
34  
35  
36  
37  
38  
39  
40  
41  
42  
43  
44  
45  
46  
47  
48  
49  
50  
51  
52  
53  
54  
55  
56  
57  
58  
59  
60

For peer review only

| Upper Level             | Sub-Level 1           | Definition                                                                                                                                                                            |
|-------------------------|-----------------------|---------------------------------------------------------------------------------------------------------------------------------------------------------------------------------------|
| implementation outcome  |                       | characteristic of the technology regarding its implementability in clinical practice, as supported by evidence                                                                        |
|                         | Acceptability         | Implementation outcome referring to whether stakeholders reported satisfaction with various features of the technology and the experience of using it to support medication adherence |
|                         | Feasibility           | Implementation outcome referring to whether stakeholders perceived the technology as practical and fit for use in supporting medication adherence                                     |
| implementation strategy | Sustainability        | Implementation outcome referring to whether stakeholders perceived the technology as appropriate for routine sustained use in supporting medication adherence                         |
|                         |                       | characteristic of the technology that facilitate implementation and maintenance of the technology in a setting                                                                        |
|                         | training              | Implementation strategy referring to activities to teach stakeholders about the technology and how to use it and integrate in the medication adherence support processes              |
|                         | educational materials | Implementation strategy referring to materials stakeholders may consult to learn about the technology and how to use it and integrate in the medication adherence support processes   |
|                         | funding               | Implementation strategy referring to financial strategies and/or additional costs to facilitate adoption of the technology into medication adherence support practice                 |
|                         | expertise sharing     | Implementation strategy referring to information from previous implementations on what helped adopt the technology into medication adherence support practice                         |
|                         | technical assistance  | Implementation strategy referring to systems to support implementation of the technology into medication support practice                                                             |
|                         | consultation          | Implementation strategy referring to accessing direct support from experts for the implementation of the technology into medication support practice                                  |



1  
2  
3  
4  
5  
6  
7  
8  
9  
10  
11  
12  
13  
14  
15  
16  
17  
18  
19  
20  
21  
22  
23  
24  
25  
26  
27  
28  
29  
30  
31  
32  
33  
34  
35  
36  
37  
38  
39  
40  
41  
42  
43  
44  
45  
46

|                                 |                                                                                                                                                                                                      |
|---------------------------------|------------------------------------------------------------------------------------------------------------------------------------------------------------------------------------------------------|
| accreditation & legal approvals | Implementation strategy referring to credentials and/or licensing to acquire or prove to be able to use the technology in a setting in the conditions necessary for optimal safety and effectiveness |
| collaborations                  | Implementation strategy referring to involving multiple institutions in delivering the medication adherence support solution that uses the technology                                                |
| access to additional resources  | Implementation strategy referring to access to data, space, laboratory facilities                                                                                                                    |

For peer review only

## DEVELOPMENT AND JUSTIFICATION

Medication adherence support technologies (as medications themselves) work only if they are adopted by individual users or by a group of healthcare providers and users in a healthcare setting, if their use is maintained for the duration in which they are designed to be used to bring about the expected benefits, and if they are used as intended for this duration. Evidence in implementation sciences is accumulating in recent years on how to facilitate the adoption and use of technologies (or interventions) in real-world settings. This question needs to be addressed separately, as most interventions are developed in contexts not representative for real-world situations and many additional challenges occur, particularly when scaling-up such interventions within care delivery. To move from research/development settings into clinical care, researchers need to consider implementation challenges already from the technology development stage.

The field of implementation sciences is relatively new, and only recently efforts have been made to structure terminology and propose concepts to be used in a standardized way. To ascertain whether the implementation of an intervention has been successful, specific consideration needs to be given to implementation outcomes, i.e., “the effects of deliberate and purposive actions to implement new treatments, practices, and services”, which are intermediary to the service and client outcomes envisaged by an intervention. Among the 8 outcomes proposed in the taxonomy of Proctor et al (2011) following literature review and expert panel discussions, some refer primarily to the process of implementation and use (e.g. adoption, penetration, fidelity) and to the application of the technology in a specific setting (appropriateness, implementation cost), others can be construed as mostly referring to the technology itself across settings and were selected for the ENABLE repository. The Expert Recommendations for Implementing Change (ERIC) project has compiled a list of 73 implementation strategies, i.e., “methods or techniques used to enhance the adoption, implementation, and sustainability of a clinical program or practice”. This taxonomy, the result of a Delphi expert consensus process with input from numerous stakeholders, achieves a similar goal of aligning language and provides a comprehensive range of options from which implementers may choose strategies to boost the scaling-up of their innovation in a clinical setting. As for implementation outcomes, many of these strategies refer to the process of implementation itself and are highly dependent on the setting; thus, an implementation team may decide to start with assessing local needs, to conduct iterative tests of change, to create new clinical teams, to develop and implement tools for quality monitoring, etc. in response to barriers or facilitators identified during project planning. However, some implementation strategies are also dependent on the technology itself and can be addressed at least partly in the development and implementation of the technology across settings; we have therefore examined the ERIC compilation and selected strategies that could be technology-specific and addressed across settings. The conceptual structuring of this field is in constant evolution; however, these two classifications have already gained notoriety and are likely to be used by stakeholders to generate and use evidence on medication adherence technologies.

Following this preliminary work on the ENABLE repository, three implementation outcomes were selected and adapted from the taxonomy of implementation outcomes to target early-, mid-, and late-implementation phases. They refer to whether stakeholders are satisfied with the technology and using it (acceptability), whether they perceive it as practical and fit for use (feasibility) and appropriate for routine use on the long term (sustainability). Eight implementation strategies were selected and adapted from the ERIC compilation of implementation strategies, following the [interventienet.nl](http://www.interventienet.nl) format. Thus, the ENABLE repository will aim to collect information on whether there is any information available, any benefit/need, and any support already provided for the following topics: training stakeholders and users for working with the technology, accessing education materials about the technology, any financial strategies or additional costs applicable, any expertise to share from previous implementations, any consultation to access for support in implementation/use, any accreditation or legal approvals necessary, and whether the involvement of multiple institutions is needed for implementing the technology into clinical care.

1  
2  
3  
4  
5  
6  
7  
8  
9  
10  
11  
12  
13  
14  
15  
16  
17  
18  
19  
20  
21  
22  
23  
24  
25  
26  
27  
28  
29  
30  
31  
32  
33  
34  
35  
36  
37  
38  
39  
40  
41  
42  
43  
44  
45  
46



For peer review only



## ENABLE Repository Delphi survey - study information letter

### *What is this study about?*

Adherence to medication has been found to be suboptimal in numerous chronic conditions and to have a negative impact on chronic disease management, patient's general health status, quality of life and working abilities as well as health care costs and waste. Numerous technologies exist to support medication adherence, yet few are implemented into practice. An online interactive repository of available technologies may facilitate their selection and adoption by different stakeholders. Developing such repository is among the main tasks of the ENABLE COST Action (CA19132), within the remit of Working Group 2. To meet this challenge the ENABLE Action includes a large interdisciplinary network of experts in medication adherence from 39 European countries and has initiated several activities towards these goals. A definition of medication adherence technologies and a framework of attributes were developed. The framework was structured into three domains (product and provider information, medication adherence descriptors and evaluation and implementation) branching in attribute groups, which branch further into sublevels with related labels and definitions.

### *What to expect from study participation?*

The proposed definition and framework will be evaluated in a real-time online Delphi study by stakeholders from 39 countries with research, practice, policy, patient representation and technology development backgrounds. It is expected that you and other invited stakeholders evaluate the proposed the relevance, clarity and completeness of the definition and repository attributes. All participants have multiple opportunities to reconsider their evaluations based on aggregated feedback updated in real-time.

Participants are invited to rate the degree of relevance and clarity of the proposed definition of medication adherence technologies, and of each attribute group, by placing a dot on a 2D-grid; the position of the dot on the vertical axis indicates clarity (low to high = bottom to top), and its position on the horizontal axis indicates relevance (low to high = left to right). Participants are encouraged to provide their comments and suggestions (anonymously) on the comments section and engage with other participants' comments.

We will stop the survey when a predefined number of participants will respond, and when stability of responses will be reached. We will summarize the results descriptively and compare evaluations across stakeholder groups and countries. We will quantify agreement among stakeholders on proposed attribute groups using the IPRAS analysis technique from RAND/UCLA Appropriateness Method.





**ENABLE**  
ADHERENCE



### ***How to participate?***

Firstly, by this email we extended our invitation to you and are asking for authorization to use your email within the scope of this study. If after considering this information you agree to participate, please access directly the link provided in the email sent from the eDelphi.org. You will be formally asked about your consent to participate when you will access the survey after a brief introduction, and the questions will appear only once you will consent to this study.

### ***How are data collected and stored?***

For this study it is necessary to collect some personal data. This includes your name and email address, as well as your age, gender, field of work/expertise, country, education level and the role of your participation with years of experience in it (researcher/academic; healthcare practitioner; policy/decision maker; patient representation; eHealth/IT specialist). Your name and email address are not linked to other data you provide by answering the survey. The personal data will not be visible to other respondents. The personal data used for conducting this study will be stored until the end of the COST Action ENABLE (October 2024) and then erased.

### ***Ethical and data protection approvals***

This study obtained ethics approval from Malaga Regional Research Ethics Committee in April 2021. In addition, the Delphi protocol was determined as compliant regarding data protection and security by Data Protection Officer from University of Basel.

For more information about your rights on data processing, and further questions about the project please contact the ENABLE-R Delphi at [wg2enablecost@gmail.com](mailto:wg2enablecost@gmail.com).

On behalf of the ENABLE WG2 Steering Committee,

Alex Dima and Urska Nabergoj Makovec



## Summary of the Delphi survey

### Welcome

### Instructions for the Delphi survey (2 pages)

### Agreement with the GDPR statement

### Demographic information (gender, age, country, education, professional field)

### Through which perspective are you answering today?

|                               | Research/education professional | Healthcare practitioner | Policy/decision makers | Patient perspective | eHealth/ IT specialist |
|-------------------------------|---------------------------------|-------------------------|------------------------|---------------------|------------------------|
| Less than 5 years experience  |                                 |                         |                        |                     |                        |
| 10 to <15 years experience    |                                 |                         |                        |                     |                        |
| 15 to <20 years experience    |                                 |                         |                        |                     |                        |
| 20 to <30 years experience    |                                 |                         |                        |                     |                        |
| More than 30 years experience |                                 |                         |                        |                     |                        |

## What is a "medication adherence technology"?

*For the purpose of this repository, we propose the following definition: "Medication Adherence Technologies (MATech) are devices, procedures or systems developed based on evidence to support patients to take their medications as agreed with the healthcare providers (i.e. to initiate, implement, and persist with the medication regimen)."*

**1) Please rate your level of agreement with the proposed MATech definition (X axis).**

**2) Please rate the CLARITY of the MATech definition (Y axis).**

Detailed explanation of the definition and repository scope:

- **devices, procedures or systems** emphasize the inclusion of all technologies, irrespective of their mode of delivery (whether based on electronic or printed supports, delivered through human interaction, or a combination of these) with the aim to construct a comprehensive repository in which users can identify diverse technologies to fit their potentially diverse needs.
- **developed based on evidence** encompass the requirement of evidence/research that supports at least a potential contribution to either measurement or intervention on medication adherence (e.g., validation study on measurement of medication adherence, or pilot study with medication adherence among outcomes). Thus, technologies that are not (yet) supported by evidence (e.g., are in earlier stages of development and testing), or clinical practice protocols without an evidence base on at least one aspect (safety, efficacy, effectiveness, cost-effectiveness, appropriateness, social and ethical values or quality), will not be (yet) included in the repository until such evidence is produced and reported.
- **support patients to take their medications as agreed with the healthcare providers (i.e., to initiate, implement, and persist with the medication regimen)** encompass the contribution of the technology to medication adherence management – either directly in patients' self-management, or by supporting professionals to offer such services to patients through all phases of medication adherence. Thus, technologies that focus on other medication management goals, but do not target adherence specifically would be out of scope for this repository.

*The MATech definition and scope of the repository is based on the WHO definition of health technologies, the WHO publication "Adherence to long-term therapies: evidence for action", the ABC taxonomy and the European Commission definition of best practice.*

### D1.1 Product and provider information

The product and provider domain entails basic information about the product and provider organization as well as the description of the repository entry and source of information.

1) Please rate the **RELEVANCE** of this attribute group (X axis).

2) Please rate the **CLARITY** of this attribute group (Y axis).

#### Further explanation:

Domain 1 consists of one attribute group and includes the attributes for the description of basic product and manufacturer/developer information, as follows:

1. **Product** is a device, procedure or system, that could be used to manage adherence to medication described by its name, brand, type, release date, ...
2. **Provider organization** is the organization that produces and/or makes the product available for users described by its name, type, domain activity, contact details...
3. **Repository entry** is a description of a health technology by a repository author account (ID, date of entry, update, verification).
4. **Author of the product description** is a person or group of persons who enters information about at least one MATEch in the ENABLE-R database (ID, name, date, contact details).

*The definitions of domain 1 are based on the ITEMAS ontology. For a more detailed view of the respective sub-levels with labels and definitions please check the interactive graph or the Excel file under supporting information.*



## Table of contents for Domain 2 – medication adherence descriptors

### D2.1 Target use scenario

Target use scenario is the type of common adherence management activities that the technology is intended to be used for (i.e., for self-management of adherence or support service use).

1. Please rate the **RELEVANCE** of this attribute group (X axis).
2. Please rate the **CLARITY** of this attribute group (Y axis).

#### Further explanation:

Target use scenario entails:

1. **Adherence self-management** is the scenario in which the technology is used for adherence self-management activities and can be further defined by:
  - Person in the healthcare environment (*patient or caregiver*)
  - Patient age group (*adult, adolescent, child, infant*)
  - Patient functional status (*mental functions, sensory functions, movement-related functions*)
  - Patient literacy (health literacy, including medication literacy)
  - Patient polypharmacy
  - Patient multimorbidity
2. **Adherence support use** is the scenario in which the technology is used for activities supporting taking medication in a health/social care provision setting and can be further specified by the following user types:
  - Professional health and social care provider
  - Health (system) manager

*The definitions of target use scenarios are based on several taxonomies -SNOMED-CT, and WHO International Classification of Functioning, Disability and Health (ICF), and Digital Health Interventions (DHI)- and research literature sources. For a more detailed view of the respective sub-levels with labels and definitions please check the interactive graph or the Excel file under supporting information.*

### D2.2 Target health conditions

Target health conditions are the type of diseases or health problems the technology is intended for.

1. Please rate the **RELEVANCE** of this attribute group (X axis).
2. Please rate the **CLARITY** of this attribute group (Y axis).

#### Further explanation:

Target health conditions entail:

1. Blood
2. Cancer and neoplasms
3. Cardiovascular
4. Congenital disorder
5. Ear
6. Eye
7. Infection

8. Inflammatory and immune system
9. Injuries and accidents
10. Mental health
11. Metabolic and endocrine
12. Musculoskeletal
13. Neurological
14. Oral and gastrointestinal
15. Renal and urogenital
16. Reproductive health and childbirth
17. Respiratory
18. Skin
19. Stroke
20. Generic health relevance

*The definitions of target health conditions are based on The International Classification of Disease (ICD-11) and The Health Research Classification System (HRCS) from the UK clinical research association. For a more detailed view of the respective sub-levels with labels and definitions please check the interactive graph or the Excel file under supporting information.*

### **D2.3. Medication regimen**

**Medication regimen attributes are the prescribed schematic form/therapeutic plan of medication therapy that the technology is intended for.**

- 1. Please rate the RELEVANCE of this attribute group (X axis).**
- 2. Please rate the CLARITY of this attribute group (Y axis).**

#### **Further explanation:**

Medication regimen attributes entail:

1. **Type of intention** as the purpose for which the medication is prescribed (*e.g., preventive or therapeutic*).
2. **Duration of treatment** presents the intended interval of treatment and relates to the clinical course and disease conditions (*e.g., short or long-term*).
3. **Route of administration** is the route in which medications/doses are administered to unfold pharmacological effects (*e.g., oral, inhaled, injections/subcutaneous, infusion/parenteral, patches, topical*).
4. **Number of monitored medications** defines how many distinct medications are monitored by the technology, if applicable (*e.g., single medication, multiple medication*).
5. **Prescribed dosing frequency** defines the dose-taking patterns recommended for medicines administration, in which doses should be taken at defined time intervals over a defined time period (*e.g., once-daily, multiple daily dosing at fixed intervals, once per week dosing, multiple dosing per week in fixed intervals, dose adjustment recommendations*).

*The definitions of medication regimen attributes are based on several taxonomies: SNOMED-CT; National Cancer Institute Thesaurus (NCIT) and Medical Subject Headings (MeSH). For a more detailed view of the respective sub-levels with labels and definitions please check the interactive graph or the Excel file under supporting information.*

#### **D2.4.1. Phase of medication adherence**

**A medication adherence phase is a time interval between the prescription start and end dates that is behaviourally (i.e., linked with specific determinants and outcomes) and metrically (i.e., requires specific estimation methods) distinct.**

1. Please rate the **RELEVANCE** of this attribute group (X axis).
2. Please rate the **CLARITY** of this attribute group (Y axis).

#### Further explanation

Medication adherence phases include

1. **Initiation** is the phase of adherence that covers the start of a prescribed treatment, i.e., the period from when the prescription is issued to the first dose taken (i.e., the initiation event)
2. **Implementation** is the phase of adherence from the initiation until the last dose taken during which one can estimate the extent to which the patient's dose taking and timing are linked to the prescribed dosing regimen.
3. **Discontinuation (Persistence)** is the phase of adherence that refers to the end of treatment execution and covers the period until last dose is taken, e.g. end of therapy or termination by patient. Persistence is the period between initiation and discontinuation.

*The definitions of adherence management are based on the ABC Taxonomy. For a more detailed view of the respective sub-levels with labels and definitions please check the interactive graph or the Excel file under supporting information.*

#### D2.4.2.A Monitoring/measurement type of management

**Medication adherence monitoring, or measurement, is type of adherence management that refers to estimating (repeatedly) medication adherence behaviours, determinants, and/or outcomes.**

1. Please rate the **RELEVANCE** of this attribute group (X axis).
2. Please rate the **CLARITY** of this attribute group (Y axis).

#### Further explanation

Medication adherence monitoring/measurement entails:

1. **Measurement method** is a way in which information is gathered and summarized by the technology about the patient's medication adherence. It is further specified into the following:
  - **Direct observation method** is a measurement method consisting in observing medication intake directly.
  - **Pill count method** is a measurement method consisting in calculating left over pills in containers/blisters at a specific time point.
  - **Self-report method** is a measurement method using data reported by patients or caregivers about themselves (e.g., diary, questionnaire, interview/consultation).
  - **Electronic monitoring method** is a measurement method using data from devices that record medication taking events electronically (e.g., smart packages, smart pill, digital event record system).
  - **Electronic healthcare database method** is a measurement method using routinely collected data as part of a longitudinal healthcare process (e.g., electronic medical records, claims/dispensing, record linkage system).
  - **Laboratory method** is a measurement method based on clinical assessment through invasive procedure (e.g., measuring drug concentration, biomarker or treatment response in samples from body fluids).
2. **Measurement target** is a component of the adherence causal (logic) model measured by the technology. It is further defined by:
  - **Determinant measure** is measurement targeting causal influences on the behaviour that can be modifiable (amenable to intervention with a medication adherence technology).

- **Behaviour measure** is measurement targeting a self-management behaviour (e.g., adherence, diet, physical activity, tobacco use, symptom monitoring and management).
- **Outcome measure** is the measurement targeting the effects of the behaviour or change of behaviour on the patient's status (e.g., health outcome, quality of life).

The definition of adherence monitoring/measurement is based on the ABC Taxonomy. The definitions of measurement methods and targets are based on several taxonomies -SNOMED-CT, the Train4Health (T4H) behaviour change competency framework and the behaviour change intervention ontology (BCIO)-, as well as scientific literature and the methodological expertise of the repository Steering Committee. For a more detailed view of the respective sub-levels with labels and definitions please check the interactive graph or the Excel file under supporting information.

#### D2.4.2.B Support/intervention type of management

**Medication adherence support and/or intervention is a type of adherence management that refers to generating change in medication adherence determinants and thus behaviours and outcomes.**

1. Please rate the **RELEVANCE** of this attribute (X axis).
2. Please rate the **CLARITY** of this attribute (Y axis).

Attribute groups further describing medication adherence support/intervention type of management are presented for your review in the next pages.

*The definitions of adherence management types are based on the ABC Taxonomy.*

##### D2.4.2.B.1 Intervention modes of delivery

**Intervention modes of delivery are the ways used to deliver a medication adherence intervention.**

1. Please rate the **RELEVANCE** of this attribute group (X axis).
2. Please rate the **CLARITY** of this attribute group (Y axis).

##### Further explanation

Intervention modes of delivery entails:

1. **Printed material** is the mode of delivery involving use of printed material (e.g., brochure or printed media such as poster, newspaper/leaflet)
2. **Human interaction** is the mode of delivery involving a person as intervention source who interacts with an intervention recipient (e.g., face to face consultations or network/patient groups)
3. **Electronic mode** is the mode involving electronic technology in the presentation of information or the mode of motivation to an intervention recipient (e.g., smartphone/tablet, wearable electronic device like smart box, smart inhaler, smart tube, smart button or digital media like internet, social media, broadcast media, billboard).

*The definitions of intervention modes of delivery are based on the Behaviour Change Intervention Ontology (BCIO), specifically a taxonomy of mode of delivery of behaviour change interventions (BCI). For a more detailed view of the respective sub-levels with labels and definitions please check the interactive graph or the Excel file under supporting information.*

### D2.4.2.B.2 Target behaviour determinants

Target behaviour determinants are causal influences on medication adherence that can be modifiable (amenable to intervention with a medication adherence technology).

1. Please rate the **RELEVANCE** of this attribute group (X axis).
2. Please rate the **CLARITY** of this attribute group (Y axis).

#### Further explanation

Target behaviour determinants entails:

1. **Capability** is a group of determinants referring to what an individual can do themselves to take medication as agreed with the healthcare provider (e.g., *psychological/cognitive capability or physical capability/skills*)
2. **Opportunity** is a group of determinants referring to the conditions in the individual's external environment that can facilitate medication adherence (e.g., *social opportunity/influences or physical opportunity/environmental context and resources*)
3. **Motivation** is a group of determinants referring to what extent the individual feels driven/willing/energized to take medication as agreed with the healthcare provider (e.g., *reflective motivation or automatic motivation*)

*The definitions of target behaviour determinants are based on the Capability, Opportunity, Motivation and Behaviour (COM-B) model, the Theoretical Domains Framework (TDF) and the Behaviour Change Intervention Ontology (BCIO), specifically The Mechanisms of Action (MoA) Ontology currently in development. For a more detailed view of the respective sub-levels with labels and definitions please check the interactive graph or the Excel file under supporting information.*

### D2.4.2.B.3 Behaviour change techniques

Behaviour change techniques (BCTs) are options/activities included in the technology that aim to influence determinants (barriers and facilitators) of medication adherence behaviours.

1. Please rate the **RELEVANCE** of this attribute group (X axis).
2. Please rate the **CLARITY** of this attribute group (Y axis).

#### Further explanation

BCTs entails:

1. **BCTs acting on capability:**
  - **feedback and monitoring** means the technology includes options to record medication intake and its effects and feed this info back to the user (e.g., *biofeedback, feedback or self-monitoring on behaviour, feedback or self-monitoring on outcomes*).
  - **repetition and substitution** means the technology includes options/activities to perform certain actions repeatedly and systematically in order to enforce medication adherence behaviours and replace other behaviours not beneficial for medication adherence (e.g., *habit formation, behavioural practice, graded tasks*).
  - **shaping knowledge** means the technology includes options for the user to learn about how to take medication as agreed with the healthcare provider, what they can do themselves to stick to the schedule in difficult situations, and test different ways of doing this.

1  
2  
3  
4  
5  
6  
7  
8  
9  
10  
11  
12  
13  
14  
15  
16  
17  
18  
19  
20  
21  
22  
23  
24  
25  
26  
27  
28  
29  
30  
31  
32  
33  
34  
35  
36  
37  
38  
39  
40  
41  
42  
43  
44  
45  
46  
47  
48  
49  
50  
51  
52  
53  
54  
55  
56  
57  
58  
59  
60

## 2. BCTs acting on opportunity:

- **demonstration of behaviour** means the technology includes an observable sample of how to take medication as agreed with the healthcare provider, directly in person or indirectly (video, pictures, drawings).
- **prompts & cues** means the technology includes ways to prompt medication intake at the agreed time. restructuring the physical environment & adding objects means the technology includes advice on how to change the environment to make it easier to take medication as agreed with the healthcare provider.
- **identity** means the technology includes ways of strengthening a positive identity that includes taking medications agreed with the healthcare provider.

## 3. BCTs acting on motivation:

- **goals and planning** means the technology includes options to encourage setting goals related to adherence and planning to achieve them (*e.g., action planning, discrepancy between behaviour and goals, goals setting and reviewing, problem solving*).
- **pros & cons** means the technology includes ways to identify and compare reasons for wanting or not wanting to take medication as agreed with the healthcare provider.
- **regulation** means the technology includes advice and/or options/activities aiming to keep motivation for medication adherence within a range favourable for performing adherence-related behaviours (*e.g., conserving mental resources, reducing negative emotions*).
- **self-belief means** the technology includes ways of increasing the person's confidence they can take medication as agreed with the healthcare provider.
- **imaginary reward** means the technology includes advice on how to imagine correct performance of medication intake.

## 4. BCTs acting across all three determinant groups:

- **social support** means the technology includes options to advise, arrange or provide social support (practical, emotional, other), or praise/reward taking medication as agreed with the healthcare provider. social reward means the technology includes verbal/non-verbal rewards when the patient shows effort and/or progress in taking medication as agreed with the healthcare provider.
- **information about consequences** means the technology includes information about consequences (health-related, emotional, social, environmental) of medication adherence (or non-adherence) and emphasize their relevance for the person.

*The definitions of behaviour change techniques are based on the Capability, Opportunity, Motivation and Behaviour (COM-B) model, the Theoretical Domains Framework (TDF), the Behaviour Change Techniques (BCT) taxonomy v1, and the Behaviour Change Intervention Ontology (BCIO). For a more detailed view of the respective sub-levels with labels and definitions please check the interactive graph or the Excel file under supporting information.*

#### D2.4.2.B.4 Intervention provider

Intervention provider is a role played by a person who uses the technology to assist the patient in their self-management of medication adherence.

1. Please rate the **RELEVANCE** of this attribute group (X axis).
2. Please rate the **CLARITY** of this attribute group (Y axis).

##### Further explanation

Intervention provider entails:

1. **Health care professional** is an intervention provider that applies scientific knowledge in medicine, nursing, midwifery, pharmacy, dentistry and/or health promotion to support patients in managing their health (e.g., medical doctor, nursing professional, pharmacist, dentist, associated health professional).
2. **Psychosocial care professional** is an intervention provider that applies scientific knowledge in psychology, sociology and other social sciences to support individual and families in a community in their well-being and life goals (e.g., psychologist).
3. **Personal care worker** is an intervention provider that delivers care, supervision and assistance for children, patients and elderly, convalescent or disabled persons in institutional and residential settings.
4. **Personal provider** is an intervention provider that is related to the person to whom the intervention is targeted through aspects of their personal lives (e.g., family member, carer, friend, peer).

The definitions of the intervention provider attributes are based on several taxonomies: BCIO, in particular the Intervention Source Ontology, and Gender, Sex and Sexual Orientation Ontology (GSSO). For a more detailed view of the respective sub-levels with labels and definitions please check the interactive graph or the Excel file under supporting information.

#### D2.4.2.B.5 Intervention setting

Intervention setting is the social and physical environment in which the technology is or can be used to manage medication adherence.

1. Please rate the **RELEVANCE** of this attribute group (X axis).
2. Please rate the **CLARITY** of this attribute group (Y axis).

##### Further explanation

Intervention setting entails:

**Physical setting** is an intervention setting that consists in a physical environment where the medication adherence technology is used (e.g., residential facility, healthcare facility, educational facility, community facility).

**Virtual setting** is an intervention setting that consists in a virtual environment where the medication adherence technology is used (e.g., telemedicine, telepharmacy).

An intervention can be applied or applicable to one type of settings, or to both.

The definitions of the intervention setting attributes group are based on the BCIO, in particular the Intervention Setting Ontology. For a more detailed view of the respective sub-levels with labels and definitions please check the interactive graph or the Excel file under supporting information.



## Table of contents for Domain 3 – evaluation and implementation

### D3.1.1.A ISO certification

ISO certification is a general quality indicator referring to whether the MATEch has obtained one or more ISO certification labels relevant for its content and purpose.

1. Please rate the **RELEVANCE** of this attribute (X axis).
2. Please rate the **CLARITY** of this attribute (Y axis).

*The definitions of quality indicators are based on a checklist of e-health quality criteria (under development), Mobile Application Rating Scale (MARS), and the Consort-EHEALTH guideline.*

### D3.1.1.B Evidence from scientific evaluation

Evidence from scientific evaluation is a group of general quality indicators referring to whether the evaluation of MATEch has been performed through the systematic, rigorous, and meticulous application of scientific methods, and the evidence obtained.

1. Please rate the **RELEVANCE** of this attribute group (X axis).
2. Please rate the **CLARITY** of this attribute group (Y axis).

#### Further explanation

The evidence from scientific evaluation entails:

1. **Research on development** means evidence from scientific evaluation is available to support the design of the MATEch. This also encompasses the classification of quality of the presented evidence.
2. **Research on effectiveness** means evidence from scientific evaluation is available to support the effectiveness of the MATEch (excluding cost-effectiveness, outlined in section D2.1.3 and implementation outcomes, outlined in section D3.2). This also encompasses the classification of quality of the presented evidence.
3. **Ethical and legal aspects** means the MATEch research has ethical approval, has considered and addressed any risks for the target population, complies with the current laws on research on humans and data privacy and safety, and has shared information about how it meets these requirements.

*The definitions of quality indicators are based on a checklist of e-health quality criteria (under development), the Mobile Application Rating Scale (MARS), and the Consort-EHEALTH guidelines. For a more detailed view of the respective sub-levels with labels and definitions please check the interactive graph or the Excel file under supporting information.*

### D3.1.1.C Development standards

Development standards are a group of general quality indicators referring to whether the MATEch has been developed according to standards established in the development of health technologies.

1. Please rate the **RELEVANCE** of this attribute group (X axis).
2. Please rate the **CLARITY** of this attribute group (Y axis).



### Further explanation

The development standards entail:

1. **Development process** means all development activities undertaken with respect to MATEch are clearly described, such as activities related to preparation, development and optimization of product components as well as the manufacturing, validation and distribution process of the MATEch.
2. **User-centred design process** means the MATEch was developed in an iterative design process in which designers involved the target users and their needs in each phase of the design process. The users' requirements, objectives, and feedback were taken into account during the development process.
3. **Conflict of interest** means the provider's conflict of interests are clearly described to assure trust and transparency.
4. **Updates of information sources** means information sources are periodically verified (proven to still be correct and accurate) and updated (new information added or design changed).

*The definitions of quality indicators are based on a checklist of e-health quality criteria (under development), Mobile Application Rating Scale (MARS), Consort-EHEALTH guideline. For a more detailed view of the respective sub-levels with labels and definitions please check the interactive graph or the Excel file under supporting information.*

#### D3.1.1.D Technological standards

**Technological standards are a group of general quality indicators referring to whether a MATEch corresponds to criteria commonly used to assess the technical functioning of electronic/digital components, if applicable.**

1. Please rate the **RELEVANCE** of this attribute group (X axis).
2. Please rate the **CLARITY** of this attribute group (Y axis).

### Further explanation

The technological standards entail:

1. **Performance** - the MATEch works fast and accurately without bugs or errors (*e.g., reliability of the interactive components, design scalability*).
2. **Data protection** - collected data is properly protected to prevent sensible data leakage (*e.g., data encryptions, antivirus supported maintenance, data storage place and capacity and protection against theft or physical attacks*).
3. **System integration** - evidence of MATEch meeting the technical, privacy and security requirements of health care systems.
4. **Inter-devices portability** - the MATEch can be connected with several devices.

*The definitions of quality indicators are based on a checklist of e-health quality criteria (under development), Mobile Application Rating Scale (MARS), Consort-EHEALTH guideline. For a more detailed view of the respective sub-levels with labels and definitions please check the interactive graph or the Excel file under supporting information.*

#### D3.1.2 Research-related quality indicators

**Quality indicators that evaluate if the research on the MATEch has been performed according to standards established in measurement and intervention research.**

1. Please rate the **RELEVANCE** of this attribute group (X axis).
2. Please rate the **CLARITY** of this attribute group (Y axis).

### Further explanation

The research-related quality indicators entail:

1. **Theory base** means the MATech is developed based on theory, evidence, theoretical framework.
2. **Validity of measurement** means the MATech is valid for certain conditions, populations, etc. (content validity)
3. **Validity of intervention** means the use of BCTs in the MATech is evidence based, i.e., there is scientific evidence that the chosen BCTs are likely to be effective in influencing the chosen behaviour determinants.
4. **Reliability of measurement** means the MATech shows a high test-retest reliability, internal consistency, and inter-rater reliability.

*The definitions of quality indicators are based on a checklist of e-health quality criteria (under development), Mobile Application Rating Scale (MARS), Consort-EHEALTH guideline. For a more detailed view of the respective sub-levels with labels and definitions please check the interactive graph or the Excel file under supporting information.*

### D3.1.3 Policy-related quality indicators

**Quality indicators related to Health Technology Assessment (HTA) procedures and concepts that inform decision-making regarding implementation and use of health technologies.**

1. Please rate the **RELEVANCE** of this attribute group (X axis).
2. Please rate the **CLARITY** of this attribute group (Y axis).

### Further explanation

The policy-related quality indicators entail:

1. **Economic and cost evaluation (ECO)** means an economic analysis has been performed to inform value-for-money judgements about the MATech with information about costs, health-related outcomes and economic efficiency. It entails several types of analysis (e.g., cost-effectiveness, cost-utility, cost-benefit, budget impact), which can be country or system specific, thus the repository also needs to specify where these indicators apply.
2. **Current use of technology (CUR)** specifies the regulatory status (authorization and reimbursement) of the technology. These information are country or system specific, thus the repository also needs to specify where these indicators apply.

*The definitions of policy-related quality indicators are based on Health Technology Assessment (HTA) Core Model, version 3.0 and O'Rourke et al. (2020). "The new definition of health technology assessment". For a more detailed view of the respective sub-levels with labels and definitions please check the interactive graph or the Excel file under supporting information.*

### D3.1.4 Use-related quality indicators

**Quality indicators that evaluate if the MATech use meets users' expectations and provides a pleasurable experience of interaction with the technology.**

1. Please rate the **RELEVANCE** of this attribute group (X axis).
2. Please rate the **CLARITY** of this attribute group (Y axis).

### Further explanation

The use-related quality indicators entail:

1. **Usability** means MATech qualities such as simplicity, organization, intuitiveness and reliability. High usability is indicated when MATech is simple, well organized, intuitive and reliable.
2. **Satisfaction** means satisfaction with MATech assessments were performed to control the level of satisfaction of the end user.
3. **Customization** means the MATech or some parts of it can be customized to the needs of the individual user.
4. **Aesthetics** is the perception of the product, which can be described as aesthetic (size, layout, graphic, font size etc.) as this was evaluated in a research project or external review.
5. **Readability** means the ease of understanding or comprehension achieved by the style of writing. The reader must be able to recognize (decode) the words in the medical device patient labelling as well as comprehend the meaning of the text.

*The definitions of quality indicators are based on a checklist of e-health quality criteria (under development), the Mobile Application Rating Scale (MARS), and the Consort-EHEALTH guideline. For a more detailed view of the respective sub-levels with labels and definitions please check the interactive graph or the Excel file under supporting information.*

### D3.2.1 Implementation outcomes

**Implementation outcomes are characteristics of the technology regarding its implementability in clinical practice, as supported by evidence.**

1. **Please rate the RELEVANCE of this attribute group (X axis).**
2. **Please rate the CLARITY of this attribute group (Y axis).**

### Further explanation

Implementation outcomes entail:

**Acceptability** means whether stakeholders reported satisfaction with various features of the technology and the experience of using it to support medication adherence

**Feasibility** means whether stakeholders perceived the technology as practical and fit for use in supporting medication adherence

**Sustainability** means whether stakeholders perceived the technology as appropriate for routine sustained use in supporting medication adherence

*Definitions of implementation outcomes and strategies are based on Proctor et al. (2011) "Outcomes for Implementation Research: Conceptual Distinctions, Measurement Challenges, and Research Agenda", the Consolidated framework for advancing implementation science (CFIR), the Expert Recommendations for Implementing Change (ERIC) and the Interventienet.nl website. For a more detailed view of the respective sub-levels with labels and definitions please check the interactive graph or the Excel file under supporting information.*

### D3.2.2 Implementation strategies

**Implementation strategies are characteristics of the technology that facilitate implementation and maintenance of the technology in a setting.**

1. **Please rate the RELEVANCE of this attribute group (X axis).**
2. **Please rate the CLARITY of this attribute group (Y axis).**

### Further explanation

Implementation strategies entail:

1. **Training** are activities to teach stakeholders about the technology and how to use it and integrate in the medication adherence support processes.
2. **Educational materials** are materials stakeholders may consult to learn about the technology and how to use it and integrate in the medication adherence support processes.
3. **Funding** are financial strategies and/or additional costs to facilitate adoption of the technology into medication adherence support practice.
4. **Expertise sharing** are information from previous implementations on what helped adopt the technology into medication adherence support practice.
5. **Technical assistance** are systems to support implementation of the technology into medication support practice
6. **Consultation** means accessing direct support from experts for the implementation of the technology into medication support practice.
7. **Accreditation & legal approvals** are credentials and/or licensing to acquire or prove to be able to use the technology in a setting in the conditions necessary for optimal safety and effectiveness.
8. **Collaborations** means involving multiple institutions in delivering the medication adherence support solution that uses the technology.
9. **Access to additional resources** means access to data, space, laboratory facilities.

*Definitions of implementation outcomes and strategies are based on Proctor et al. (2011) "Outcomes for Implementation Research: Conceptual Distinctions, Measurement Challenges, and Research Agenda", the Consolidated framework for advancing implementation science (CFIR), the Expert Recommendations for Implementing Change (ERIC) and the Interventienet.nl website. For a more detailed view of the respective sub-levels with labels and definitions please check the interactive graph or the Excel file under supporting information.*

1  
2  
3 **Thank you and see you soon!**  
4

5 Dear panellist,  
6

7 you have made it to the end of the survey. We appreciate your effort and valuable contribution to  
8 development of the ENABLE repository of medication adherence technologies.  
9

10 **Please remember to visit the survey several times during the study period** to reconsider your  
11 answers based on the aggregated feedback and discussions with the other anonymous panellists.  
12 Reminders will be sent every 2 weeks to remind you to log in and participate again.  
13

14  
15 Please don't hesitate to contact us on [wg2costenable@gmail.com](mailto:wg2costenable@gmail.com) in case of any questions.  
16

17 Best wishes,  
18

19 The ENABLE WG2 Steering Committee  
20





## General data protection statement (GDPR)

By continuing the survey, you declare that you have read, understood and agreed with the following statements:

- 1. This Delphi survey is performed by the COST Action ENABLE (CA19132) Working group 2 with principal investigators Alexandra Lelia Dima and Urska Nabergoj Makovec.*
- 2. The aim of the study is to explore the level of agreement on the proposed structure for a repository of medication adherence technologies*
- 3. Participation in the survey is voluntary and the study is designed to ensure participants' anonymity as one of the key features of the Delphi approach.*
- 4. The collected personal data will be used exclusively for conducting the study and analysing and reporting results in an aggregated form.*
- 5. In order to illustrate some study findings, we might quote statements provided by individual respondents in open text fields; however, the Delphi platform ensures that no personal data can linked to such statements.*
- 6. A data protection assessment was carried out by the Data Protection Officer at the University of Basel. According to this instance the Delphi study protocol was determined as compliant with data protection and security standards.*
- 7. The personal data used for conducting this study will be stored until the end of the COST Action ENABLE (October 2024). You can address your rights regarding access to, correction of or limitation of use of your personal data through the email [wq2enablecost@gmail.com](mailto:wq2enablecost@gmail.com) anytime during that time period.*



Welcome to the ENABLE-R real time Delphi survey!

**ENABLE** is a European Cooperation In Science and Technology (COST) project ("[CA19132 - European Network to Advance Best practices & technology on medication adherence](#)") that aims to raise awareness of medication adherence technologies and best practices, and to foster and extend multidisciplinary knowledge on medication adherence at patient, treatment and system levels. COST is supported by the EU Framework Programme Horizon 2020. ENABLE currently has members from 39 European countries.

**ENABLE-R** will be an online repository of medication adherence technologies (**ENABLE-R**), which will describe a wide range of technologies relevant for different potential users: patients, healthcare professionals, managers of healthcare organisations, policy makers, researchers. The aim is to develop a user-friendly repository, where users will be able to search technologies with specific attributes, that would fit their context and needs.

**This Delphi survey aims to explore the level of agreement with the proposed scope and structure of the repository.** A steering committee has been working since October 2020 to define medication adherence technologies and propose a repository structure that considers many aspects of such technologies and their use in different settings. To ensure that the scope and structure is in line with stakeholders' needs and expectations, we created this Delphi survey to consult with stakeholders across Europe on several key elements of the proposed scope and structure. The study obtained ethical approval and positive data protection assessment. Please consult the survey information letter or contact us at [wg2costenable@gmail.com](mailto:wg2costenable@gmail.com) if you have any questions.

*You were recognized as a stakeholder in the area of medication adherence and are invited to participate in this Delphi survey. Thank you for taking time to complete this survey. We value your contribution.*

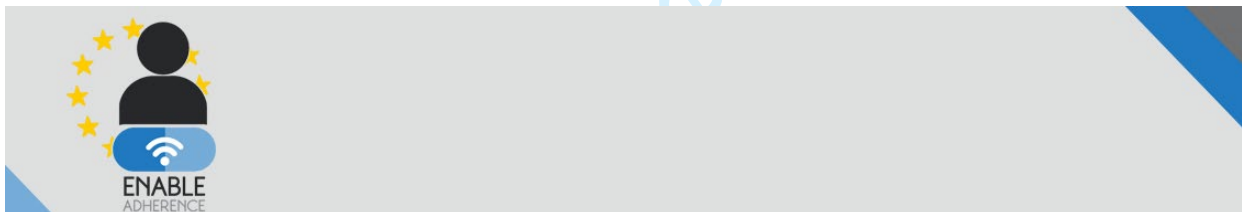



## Instruction for the Delphi survey

### The content and structure of the survey

The survey includes **23 questions** related to repository structure, each presented on a separate page. Before starting the survey, we request some **basic information** about you and your experience in medication adherence.

- We present the proposed **definition of the medication adherence technologies (MATech)** for your consideration.
- We invite you to take some time **to explore the full framework of attributes**. It consists of **three domains** (D1. Product & provider information; D2. Medication adherence descriptors; D3. Evaluation & implementation) with underlying attribute groups. Each attribute group branches further in sublevels with related labels and definitions and is labeled with domain number and consecutive number according to the level it represents (e.g. D2.1 or D2.1.1). The complete framework is presented in an interactive graph and in a Excel document detailing proposed structure, labels, definitions and justifications; you may open these documents in separate windows so that you can consult them throughout the survey. After familiarizing yourself with the framework, we ask you to **provide general comments about any missing attributes** relevant for a future MATech repository.
- We describe each domain on one page and present each attribute group and respective sublevels for your consideration on separate pages and ask you to rate **their overall relevance and clarity** and provide **comments or suggestions for improvement** of attribute labels or definitions, and any specific thoughts about any missing attributes in this particular group.

---

### The real time Delphi approach

This survey uses a **real-time approach**, which means that, once you answer a question, you will immediately see other's responses and comments and aggregated feedback on your screen. The strength of the Delphi approach lies in participants having the opportunity to revisit their answers based on other's answers and comments. Hence, it is very important that you **visit the survey two or more times during the study period and reconsider your answers based on the aggregated results and discussions in the comments section**. You are also encouraged to engage in the discussion by explaining the reasons for your responses and making suggestions for improvement. These will also appear in real-time and allow (anonymous) exchanges among stakeholders.

We will regularly check the platform, send updates on the study progress and reminders to (re)visit the survey.

---

### Completing the survey

It should take you **45 to 60 minutes** to complete the survey the first time, and approximately **30 to 60 minutes** for revisiting your answers at a later moment (depending on the level of engagement in discussions you prefer).

You can **navigate across pages** in the survey by clicking on the **blue arrow above the page number**. An index window opens and you can choose which questions you would like to answer. For the first



visit to the survey, we recommend following the order provided. You can **log in and out of the survey** and upon return continue answering where you stopped the last time.

---

## Format of the questions

For each attribute, an **interactive 2D grid with two axes** (*see below*) will appear:

- the **horizontal (X) axis** represents **RELEVANCE** of the proposed attribute group for the repository structure on a scale from **1-9 (left-right)**, where 1 indicates extremely not relevant (*far left*) and 9 indicates extremely relevant (*far right*). By relevance, we mean **the extent to which these attributes are important in order to make informed choices regarding their adoption and use.**
- the **vertical (Y) axis** represents **CLARITY** of the attribute group labels and definitions on a scale from **1-9 (bottom-top)**, where 1 indicates extremely not clear (*bottom*) and 9 indicates extremely clear (*top*). By clarity, we mean **the extent to which the labels and definitions of these attributes are easy to understand and apply by repository users.**
- after deciding on your rating on both axes, you can mark your answer in the grid and a **blinking dot** will appear representing both your ratings. **One dot for two ratings: left-right RELEVANCE, bottom-up CLARITY.**
- the scale is continuous, which means you can click anywhere in the grid and thus rate using decimal values (e.g. 4.7)
- after providing your answer, you will be able **to see other participants' ratings represented as dots on the same grid**, and aggregated feedback on the right side of the 2D grid.
- You can change your ratings any time during the study period, by **moving the blinking dot on the grid**. Moreover, you are **encouraged to revisit your answers** on multiple occasions in light of other participants' answers.

Each attribute page also contains a **comments section**. Below the 2D grid you can find open text fields to provide comments or suggestions on the attribute and related sublevels. All comments are displayed anonymously. Please provide your comments in the relevant pre-defined category:

- revisions of attribute labels and definitions
- missing attributes in this group

There you can also see other participants' comments and suggestions and respond to them. Please remember to **save your comments** before leaving a page so that they can be recorded and displayed.

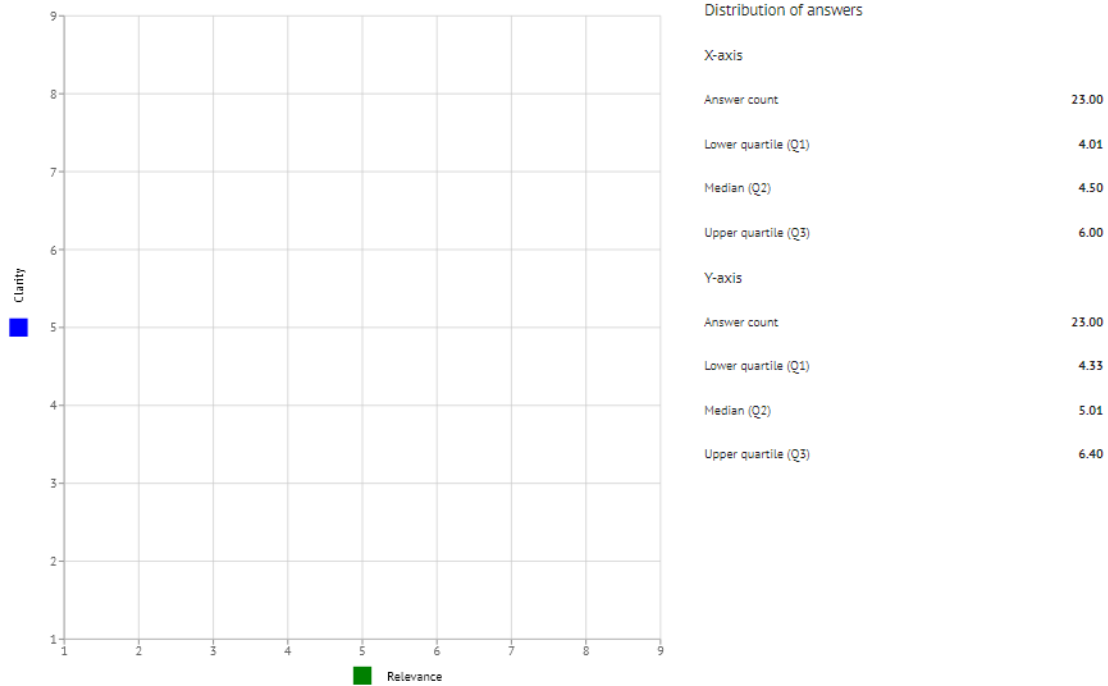

Revisions of attribute labels and definitions | Missing attributes in this group

### REVISIONS OF ATTRIBUTE LABELS AND DEFINITIONS

### COMMENTS

Select the amount of shown comments:   Newest first  Oldest first

Peer review only



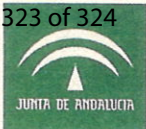

Servicio Andaluz de Salud  
CONSEJERÍA DE SALUD

Dra. Dña. Gloria Luque Fernández, Secretaria del CEI Provincial de Málaga

CERTIFICA:

Que en la sesión de CEI de fecha: 29/04/2021 ha evaluado la propuesta de D/Dña.: Pilar Barnestein Fonseca, referido a la MS1 del Proyecto de Investigación: "COST Action "European Network to Advance Best practices & technoLogY on medication adherence" (ENABLE) ".

Este Comité lo considera ética y metodológicamente correcto.

La composición del CEI en esta sesión es la siguiente:

|                                                               |                                              |
|---------------------------------------------------------------|----------------------------------------------|
| Dra. Ana Alonso Torres (UGC Neurociencias)                    | Dra. Elena Sánchez Yáñez                     |
| Dra. Encarnación Blanco Reina (Farmacología Clínica)          | Dr. Antonio López Téllez (Médico de Familia) |
| Dra. Begoña Jiménez Rodríguez (UGC Oncología)                 |                                              |
| Dra. Marta Blasco Alonso (Obst. y Ginecología)                |                                              |
| Dr. Rafael Carvia Ponsaille (Anatomía Patológica)             |                                              |
| D <sup>a</sup> . Ana Díaz Ruíz (Licenciada en Derecho)        |                                              |
| Dr. José C. Fernández García (UGC Endocrinología y Nutrición) |                                              |
| Dr. Manuel Herrera Gutiérrez (UGC UCI)                        |                                              |
| Dra. M <sup>a</sup> . Victoria de la Torre Prados (UMA)       |                                              |
| Dr. José Leiva Fernández (Médico Familia)                     |                                              |
| Dra. M <sup>a</sup> Dolores López Carmona (Medicina Interna)  |                                              |
| Dr. Jesús López del Peral (Esp. Protec. Datos)                |                                              |
| Dña. Carmen López Gálvez del Postigo (Miembro Lego)           |                                              |
| D <sup>a</sup> . Inmaculada Doña Díaz (Alergología)           |                                              |
| Dra. Gloria Luque Fernández (Investigación)                   |                                              |
| Dra. Cristobalina Mayorga Mayorga (Laboratorio)               |                                              |
| Dra. M <sup>a</sup> Angeles Rosado Souvirón (UGC Farmacia)    |                                              |
| Dra. Leonor Ruíz Sicilia (UGC Salud Menta.)                   |                                              |

Lo que firmo en Málaga, a 29 de abril de 2021

Fdo.: Dra. Gloria Luque Fernández  
Secretaria del CEI



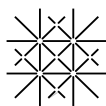

Universität  
Basel

Verwaltungsdirektion

Universität Basel, Verwaltungsdirektion, Postfach, 4001 Basel

Mrs Janette Ribaut  
Bernoullistrasse 28  
4056 Basel

Basel, 25. Mai 2021

**Data Protection Assessment of your project “Developing a medication adherence technologies repository: an online real-time Delphi survey protocol”**

Dear Ms. Ribaut

I would like to confirm, that we have reviewed your project with regard to data protection and data security. Based on the documents provided to us, we can confirm that data protection is complied with in your project. In particular, since you collect the survey responses exclusively anonymously and no conclusions can be drawn about individual persons.

Yours sincerely,

Danielle Kaufmann  
Data Protection Officer

Seite 1/2

Universität Basel  
Verwaltungsdirektion  
Petersgraben 35, Postfach 2148  
4001 Basel, Switzerland

Danielle Kaufmann, lic. iur.  
Datenschutzbeauftragte  
T +41 61 207 30 22  
M +41 79 381 20 72  
Danielle.kaufmann@unibas.ch

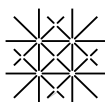

**Universität  
Basel**

Verwaltungsdirektion

1  
2  
3  
4  
5  
6  
7  
8  
9  
10  
11  
12  
13  
14  
15  
16  
17  
18  
19  
20  
21  
22  
23  
24  
25  
26  
27  
28  
29  
30  
31  
32  
33  
34  
35  
36  
37  
38  
39  
40  
41  
42  
43  
44  
45  
46  
47  
48  
49  
50  
51  
52  
53  
54  
55  
56  
57  
58  
59  
60

For peer review only
