# Supplementary material for: Developing a medication adherence technologies repository: proposed structure and protocol for an online real-time Delphi study
Source: PubMed Central journal article supplement — BMJ Open. 2022 Apr 22;12(4):e059674. doi: 10.1136/bmjopen-2021-059674 (PMC9074304; doi:10.1136/bmjopen-2021-059674), 2022-04-22

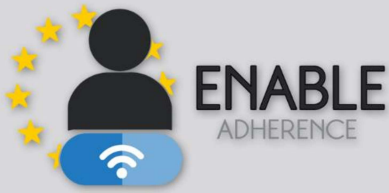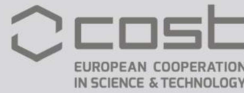

## General data protection statement (GDPR)

By continuing the survey, you declare that you have read, understood and agreed with the following statements:

1. *This Delphi survey is performed by the COST Action ENABLE (CA19132) Working group 2 with principal investigators Alexandra Lelia Dima and Urska Nabergoj Makovec.*
2. *The aim of the study is to explore the level of agreement on the proposed structure for a repository of medication adherence technologies*
3. *Participation in the survey is voluntary and the study is designed to ensure participants' anonymity as one of the key features of the Delphi approach.*
4. *The collected personal data will be used exclusively for conducting the study and analysing and reporting results in an aggregated form.*
5. *In order to illustrate some study findings, we might quote statements provided by individual respondents in open text fields; however, the Delphi platform ensures that no personal data can linked to such statements.*
6. *A data protection assessment was carried out by the Data Protection Officer at the University of Basel. According to this instance the Delphi study protocol was determined as compliant with data protection and security standards.*
7. *The personal data used for conducting this study will be stored until the end of the COST Action ENABLE (October 2024). You can address your rights regarding access to, correction of or limitation of use of your personal data through the email [wq2enablecost@gmail.com](mailto:wq2enablecost@gmail.com) anytime during that time period.*

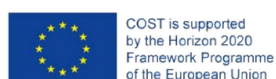

Supplement: bmjopen-2021-059674supp005.pdf [file bmjopen-2021-059674supp005.pdf]
