# Supplementary material for: Developing a medication adherence technologies repository: proposed structure and protocol for an online real-time Delphi study
Source: PubMed Central journal article supplement — BMJ Open. 2022 Apr 22;12(4):e059674. doi: 10.1136/bmjopen-2021-059674 (PMC9074304; doi:10.1136/bmjopen-2021-059674), 2022-04-22
Supplement: bmjopen-2021-059674supp007.pdf [file bmjopen-2021-059674supp007.pdf]

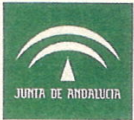

Servicio Andaluz de Salud  
CONSEJERÍA DE SALUD

*Comité de Ética de la Investigación Provincial de Málaga*

Dra. Dña. Gloria Luque Fernández, Secretaria del CEI Provincial de Málaga

CERTICA:

Que en la sesión de CEI de fecha: 29/04/2021 ha evaluado la propuesta de D/Dña.: Pilar Barnestein Fonseca, referido a la MS1 del Proyecto de Investigación: "COST Action "European Network to Advance Best practices & technoLOGY on medication adherence" (ENABLE) ".

Este Comité lo considera ética y metodológicamente correcto.

La composición del CEI en esta sesión es la siguiente:

- |                                                               |                                              |
|---------------------------------------------------------------|----------------------------------------------|
| Dra. Ana Alonso Torres (UGC Neurociencias)                    | Dra. Elena Sánchez Yáñez                     |
| Dra. Encarnación Blanco Reina (Farmacología Clínica)          | Dr. Antonio López Téllez (Médico de Familia) |
| Dra. Begoña Jiménez Rodríguez (UGC Oncología)                 |                                              |
| Dra. Marta Blasco Alonso (Obst. y Ginecología)                |                                              |
| Dr. Rafael Carvia Ponsaille (Anatomía Patológica)             |                                              |
| Dña. Ana Díaz Ruíz (Licenciada en Derecho)                    |                                              |
| Dr. José C. Fernández García (UGC Endocrinología y Nutrición) |                                              |
| Dr. Manuel Herrera Gutiérrez (UGC UCI)                        |                                              |
| Dra. M <sup>a</sup> Victoria de la Torre Prados (UMA)         |                                              |
| Dr. José Leiva Fernández (Médico Familia)                     |                                              |
| Dra. M <sup>a</sup> Dolores López Carmona (Medicina Interna)  |                                              |
| Dr. Jesús López del Peral (Esp. Protec. Datos)                |                                              |
| Dña. Carmen López Gálvez del Postigo (Miembro Lego)           |                                              |
| Dña. Inmaculada Doña Díaz (Alergología)                       |                                              |
| Dra. Gloria Luque Fernández (Investigación)                   |                                              |
| Dra. Cristobalina Mayorga Mayorga (Laboratorio)               |                                              |
| Dra. M <sup>a</sup> Angeles Rosado Souvirón (UGC Farmacia)    |                                              |
| Dra. Leonor Ruíz Sicilia (UGC Salud Menta.)                   |                                              |

Lo que firmo en Málaga, a 29 de abril de 2021

Fdo.: Dra. Gloria Luque Fernández  
Secretaria del CEI
