# Supplementary material for: Developing a medication adherence technologies repository: proposed structure and protocol for an online real-time Delphi study
Source: HighWire-hosted journal article supplement (doi:10.1136/bmjopen-2021-059674), 2022-04-01
Supplement: bmjopen-2021-059674supp008_data_supplement.pdf [file bmjopen-2021-059674supp008_data_supplement.pdf]

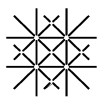

Universität  
Basel

Verwaltungsdirektion

Universität Basel, Verwaltungsdirektion, Postfach, 4001 Basel

Mrs Janette Ribaut  
Bernoullistrasse 28  
4056 Basel

Basel, 25. Mai 2021

**Data Protection Assessment of your project “Developing a medication adherence technologies repository: an online real-time Delphi survey protocol”**

Dear Ms. Ribaut

I would like to confirm, that we have reviewed your project with regard to data protection and data security. Based on the documents provided to us, we can confirm that data protection is complied with in your project. In particular, since you collect the survey responses exclusively anonymously and no conclusions can be drawn about individual persons.

Yours sincerely,

Danielle Kaufmann  
Data Protection Officer

Seite 1/2

Universität Basel  
Verwaltungsdirektion  
Petersgraben 35, Postfach 2148  
4001 Basel, Switzerland

Danielle Kaufmann, lic. iur.  
Datenschutzbeauftragte  
T +41 61 207 30 22  
M +41 79 381 20 72  
Danielle.kaufmann@unibas.ch

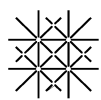

**Universität  
Basel**

Verwaltungsdirektion
